# Supplementary material
Source: PubMed Central journal article supplement (PMC7592383)
Supplement: 13073_2020_790_MOESM2_ESM.pdf [file 13073_2020_790_MOESM2_ESM.pdf]

**Table S1:** Characteristics of the UK Biobank serology sub-cohort consisting of predominantly European ancestry participants that remained after quality control filters.

| Characteristic                                    | Serology Data<br>(N=7948) |         | No Serology Data<br>(N=405,857) |        |
|---------------------------------------------------|---------------------------|---------|---------------------------------|--------|
|                                                   | N                         | (%)     | N                               | (%)    |
| Age at assessment                                 |                           |         |                                 |        |
| Mean (SD)                                         | 56.74                     | (8.07)  | 56.74                           | (8.00) |
| Sex                                               |                           |         |                                 |        |
| Male                                              | 3519                      | (44.3)  | 187685                          | (46.2) |
| Smoking status                                    |                           |         |                                 |        |
| Never smoker                                      | 4348                      | (55.0)  | 218228                          | (54.0) |
| Former smoker                                     | 2774                      | (35.1)  | 143908                          | (35.6) |
| Current smoker                                    | 789                       | (14.48) | 42285                           | (10.5) |
| Body-mass index (BMI) in kg/m <sup>2</sup>        |                           |         |                                 |        |
| Mean (SD)                                         | 27.36                     | (4.82)  | 27.41                           | (4.77) |
| Townsend deprivation index                        |                           |         |                                 |        |
| Mean (SD)                                         | -1.52                     | (2.96)  | -1.47                           | (2.99) |
| Autoimmune or chronic inflammatory condition      | 1033                      | (13.0)  | 50467                           | (12.4) |
| Any type of immune deficiency                     | 1223                      | (0.3)   | 24                              | (0.3)  |
| Cancer (prevalent or incident)                    | 1069                      | (13.4)  | 52971                           | (13.1) |
| Included in genetic association analyses (N=7985) |                           |         |                                 |        |
| <i>Human Herpes viruses</i>                       |                           |         |                                 |        |
|                                                   | Seropositive              | (%)     |                                 |        |
| Cytomegalovirus (CMV)                             | 4437                      | (56.2)  |                                 |        |
| CMV pp28                                          | 4461                      | (56.5)  |                                 |        |
| CMV pp52                                          | 5000                      | (63.3)  |                                 |        |
| CMV pp150                                         | 4526                      | (57.3)  |                                 |        |
| Epstein-Barr virus (EBV)                          | 7470                      | (94.6)  |                                 |        |
| EBV EA-D                                          | 6806                      | (86.2)  |                                 |        |
| EBV EBNA                                          | 7003                      | (88.7)  |                                 |        |
| EBV VCA p18                                       | 7492                      | (94.9)  |                                 |        |
| EBV ZEBRA                                         | 7197                      | (91.2)  |                                 |        |
| Human Herpesvirus-6 (HHV6)                        | 7156                      | (90.6)  |                                 |        |
| HHV6 IE1A                                         | 6077                      | (77.0)  |                                 |        |
| HHV6 IE1B                                         | 6237                      | (79.0)  |                                 |        |
| HHV6 p101 k                                       | 6188                      | (78.4)  |                                 |        |
| Human Herpesvirus-7 (HHV7) U14                    | 7481                      | (94.8)  |                                 |        |
| Herpes Simplex virus-1 (HSV1) 1gG                 | 5468                      | (69.3)  |                                 |        |
| Herpes Simplex virus-2 (HSV2) 2mgG                | 1214                      | (15.4)  |                                 |        |
| Kaposi's Sarcoma-Associated Herpesvirus (KSHV)    | 607                       | (7.7)   |                                 |        |
| KSHV K.81                                         | 219                       | (2.8)   |                                 |        |
| KSHV LANA                                         | 432                       | (5.5)   |                                 |        |
| VZV gE/Ig                                         | 7316                      | (92.3)  |                                 |        |

*Human Polyomaviruses*

|                                |      |        |
|--------------------------------|------|--------|
| BKV                            | 7523 | (95.3) |
| JCV                            | 4471 | (56.6) |
| Merkel Cell Polyomavirus (MCV) | 5219 | (66.1) |

*Human Papillomaviruses*

|                               |     |       |
|-------------------------------|-----|-------|
| HPV16 E6 or E7 (oncoproteins) | 371 | (4.7) |
| HPV16 L1                      | 341 | (4.3) |
| HPV18 L1                      | 190 | (2.4) |

*Hepatitis viruses*

|                   |     |       |
|-------------------|-----|-------|
| Hepatitis B (HBV) | 128 | (1.6) |
| HBV HBc           | 158 | (2.0) |
| HBV HBe           | 423 | (5.4) |
| Hepatitis C (HCV) | 23  | (0.3) |
| HCV Core          | 164 | (2.1) |
| HCV NS3           | 104 | (1.3) |

*Human T-lymphotropic viruses*

|                                      |     |       |
|--------------------------------------|-----|-------|
| Human T-lymphotropic Virus-1 (HTLV1) | 128 | (1.6) |
| HTLV1 env                            | 70  | (0.9) |
| HTLV1 gag                            | 59  | (0.3) |

**Table S2:** Odds ratios (OR) for lead variants associated with seropositivity for each antigen. Linkage disequilibrium (LD)  $r^2$  was calculated with respect to the lead variant for the continuous seroreactivity phenotype for the same antigen, if applicable.

| Antigen            | Chr   | Position | Variant   | Alleles      |        | EAF | OR    | P     | Function              | Nearest Gene | INFO                   | LD ( $r^2$ /D') with Seroreactivity Variant |                           |
|--------------------|-------|----------|-----------|--------------|--------|-----|-------|-------|-----------------------|--------------|------------------------|---------------------------------------------|---------------------------|
|                    |       |          |           | Effect       | Other  |     |       |       |                       |              |                        |                                             |                           |
| CMV                | pp150 | 10       | 71789604  | rs1181430303 | CAAT   | C   | 0.988 | 0.362 | $1.3 \times 10^{-8}$  | intergenic   | <i>RP11-262I2.2</i>    | 0.974                                       | -                         |
| EBV                | EA-D  | 6        | 32447644  | rs2395192    | C      | T   | 0.447 | 0.656 | $4.0 \times 10^{-19}$ | intergenic   | <i>HLA-DRB9</i>        | 0.983                                       | rs34825357: 0.669 / 0.880 |
| EBV                | EBNA  | 6        | 32429303  | rs9268848    | G      | A   | 0.449 | 1.598 | $1.2 \times 10^{-18}$ | intronic     | <i>HLA-DRB9</i>        | 0.992                                       | rs9269233: 0.293 / 0.854  |
| EBV                | ZEBRA | 6        | 32578323  | rs17211342   | A      | G   | 0.542 | 0.623 | $1.6 \times 10^{-15}$ | intergenic   | <i>HLA-DRB1</i>        | 0.999                                       | rs9274728: 0.387 / 0.913  |
| HHV6               | IE1B  | 4        | 111337175 | rs72666167   | G      | A   | 0.952 | 1.588 | $3.2 \times 10^{-8}$  | intronic     | <i>ENPEP / ZNF969P</i> | 0.950                                       | -                         |
| HHV6               | p101k | 6        | 31352446  | rs7775759    | G      | A   | 0.730 | 0.785 | $2.1 \times 10^{-8}$  | intergenic   | <i>HLA-S</i>           | 1.000                                       | -                         |
| HSV2               | 2mgG  | 17       | 3707723   | rs2116443    | C      | T   | 0.485 | 1.279 | $4.5 \times 10^{-8}$  | upstream     | <i>ITGAE</i>           | 0.993                                       | -                         |
| KSHV               | K8.1  | 1        | 94134854  | rs75175947   | G      | C   | 0.988 | 0.221 | $2.2 \times 10^{-8}$  | intronic     | <i>BCAR3</i>           | 0.924                                       | -                         |
|                    |       | 7        | 67785001  | rs553306098  | ATATAT | A   | 0.983 | 0.242 | $4.1 \times 10^{-8}$  | upstream     | <i>LOC105375341</i>    | 0.790                                       | -                         |
| KSHV               | LANA  | 22       | 19399297  | rs138358091  | A      | C   | 0.983 | 0.344 | $1.2 \times 10^{-8}$  | intronic     | <i>HIRA</i>            | 0.938                                       | -                         |
| VZV                | gE/Ig | 6        | 32161034  | rs3096688    | C      | T   | 0.301 | 0.701 | $3.7 \times 10^{-8}$  | intronic     | <i>GPSM3</i>           | 0.995                                       | rs9273325: 0.074 / 0.910  |
| HPV16              | E6/E7 | 6        | 32573265  | rs601148     | G      | T   | 0.805 | 0.603 | $3.3 \times 10^{-9}$  | intergenic   | <i>HLA-DRB1</i>        | 0.973                                       | -                         |
|                    |       | 19       | 30611215  | rs144341759  | G      | A   | 0.975 | 0.383 | $4.0 \times 10^{-8}$  | intergenic   | <i>CTC-448F2.6</i>     | 0.920                                       | -                         |
| HPV16              | L1    | 9        | 1061974   | rs200104414  | A      | ATG | 0.981 | 0.295 | $4.9 \times 10^{-8}$  | intergenic   | <i>RPS27AP14</i>       | 0.822                                       | -                         |
|                    |       | 5        | 139338366 | rs142237244  | G      | A   | 0.987 | 0.201 | $3.4 \times 10^{-8}$  | intronic     | <i>NRG2</i>            | 0.890                                       | -                         |
| HPV18              | L1    | 14       | 77060652  | rs4243652    | G      | A   | 0.035 | 3.132 | $7.0 \times 10^{-10}$ | intronic     | <i>LOC105370576</i>    | 0.987                                       | -                         |
|                    |       | X        | 12493856  | rs187318482  | C      | G   | 0.989 | 0.271 | $3.6 \times 10^{-8}$  | intronic     | <i>FRMPD4</i>          | 0.750                                       | -                         |
| HBV                | HBc   | 19       | 22899930  | rs111736095  | C      | T   | 0.984 | 0.217 | $8.3 \times 10^{-9}$  | upstream     | <i>CTC-457E21.9</i>    | 0.898                                       | -                         |
| HCV                | Core  | 2        | 112655155 | rs199913364  | CAG    | C   | 0.980 | 0.248 | $1.2 \times 10^{-8}$  | upstream     | <i>MERTK</i>           | 0.942                                       | -                         |
|                    |       | 11       | 75259052  | rs79794175   | C      | T   | 0.933 | 0.406 | $1.2 \times 10^{-8}$  | intergenic   | <i>SERPINH1</i>        | 1                                           | -                         |
| HCV                | NS3   | 6        | 115406379 | rs549795309  | C      | T   | 0.979 | 0.204 | $2.5 \times 10^{-8}$  | intergenic   | <i>RP11-282C5.1</i>    | 0.886                                       | -                         |
|                    |       | 10       | 82580895  | rs144432266  | A      | C   | 0.989 | 0.158 | $1.7 \times 10^{-8}$  | intergenic   | <i>FARSBP1</i>         | 0.874                                       | -                         |
| JCV                | VP1   | 6        | 32577385  | rs9271147    | T      | C   | 0.152 | 0.536 | $1.3 \times 10^{-42}$ | intergenic   | <i>HLA-DQA1</i>        | 0.998                                       | rs9271525: 0.940 / 1.000  |
| MCV                | VP1   | 6        | 32621980  | rs17613347   | T      | C   | 0.150 | 0.613 | $1.2 \times 10^{-26}$ | intergenic   | <i>HLA-DQB1</i>        | 0.995                                       | rs9268847: 0.055 / 0.975  |
|                    |       | 5        | 138845045 | 5: 138845045 | TTATC  | T   | 0.259 | 1.259 | $7.2 \times 10^{-9}$  | intergenic   | <i>ECSCR</i>           | 0.985                                       | rs7444313: 0.946 / 0.981  |
| HTLV1 <sup>1</sup> |       | 9        | 15483425  | rs16933318   | G      | C   | 0.990 | 0.153 | $3.3 \times 10^{-8}$  | intronic     | <i>PSIP1</i>           | 0.948                                       | -                         |

<sup>1</sup> Case counts for HTLV1 env and HTLV1 gag antigens were <100, therefore results are presented for HTLV1 based on seropositivity for at least one antigen

**Table S3:** Functional annotations for lead genome-wide significant variants ( $P < 5.0 \times 10^{-8}$ ) associated with antibody response. Expression (eQTL) and splicing quantitative trait loci (sQTL) associations with  $FDR < 0.05$  were obtained in GTEx v8 and DICE (Database of Immune Cell Expression). Plasma protein (pQTL) associations with  $P < 5.0 \times 10^{-8}$  were obtained from the Human Plasma Proteome atlas.

| Phenotype              | Chr | Position  | Variant     | Alleles |       | CADD <sup>1</sup> | RegulomeDB         |                   | eQTL (GTEx) |         | eQTL (DICE) |       | sQTL (GTEx) | pQTL     |
|------------------------|-----|-----------|-------------|---------|-------|-------------------|--------------------|-------------------|-------------|---------|-------------|-------|-------------|----------|
|                        |     |           |             | Effect  | Other |                   | Score <sup>2</sup> | Rank <sup>3</sup> | Genes       | Tissues | Genes       | Cells | Genes       | Proteins |
| CMV pp52               | 6   | 32301427  | rs115378818 | C       | T     | 4.55              | 0.29               | 5                 | -           | -       | -           | -     | -           | -        |
| EBV EA-D               | 6   | 32665840  | rs34825357  | T       | TC    | 10.63             | 0.63               | 5                 | 25          | 49      | -           | -     | -           | 12       |
| EBV EBNA               | 3   | 151114852 | rs67886110  | G       | T     | 1.55              | 0.20               | 6                 | 2           | 29      | 1           | 1     | -           | -        |
|                        | 6   | 32451762  | rs9269233   | A       | C     | 0.60              | 0.13               | 5                 | 27          | 48      | 4           | 10    | 13          | 4        |
| EBV p18                | 6   | 31486158  | 6:31486158  | GT      | G     | 0.02              | -                  | -                 | -           | -       | 1           | 5     | -           | -        |
| EBV ZEBRA              | 6   | 32637772  | rs9274728   | A       | G     | 7.92              | 0.95               | 5                 | 22          | 49      | 8           | 15    | 9           | 5        |
| HHV6 IE1A              | 7   | 139985625 | rs2429218   | T       | C     | 0.64              | 0.61               | 4                 | 1           | 1       | -           | -     | -           | -        |
|                        | 6   | 32602665  | rs139299944 | C       | CT    | 12.15             | 0.72               | 5                 | 15          | 48      | -           | -     | 9           | -        |
| HHV7 U14               | 11  | 118767564 | rs75438046  | G       | A     | 7.00              | 0.61               | 4                 | 2           | 6       | -           | -     | -           | -        |
|                        | 17  | 45794706  | rs1808192   | A       | G     | 4.18              | 0.55               | 1f                | 6           | 35      | 2           | 11    | 5           | -        |
| HSV1 1gG               | 6   | 32627852  | rs1130420   | G       | A     | 9.73              | 0.74               | 2b                | -           | -       | 8           | 15    | -           | 2        |
|                        | 10  | 91189187  | rs11203123  | A       | C     | 1.41              | 0.53               | 5                 | -           | -       | -           | -     | -           | -        |
| VZV gE/Ig <sup>1</sup> | 6   | 32623193  | rs9273325   | G       | A     | 4.91              | 0.13               | 5                 | -           | -       | 1           | 1     | -           | 15       |
| BKV VP1                | 19  | 49206462  | rs681343    | C       | T     | 0.06              | 0.13               | 5                 | 8           | 40      | 1           | 7     | 3           | 16       |
| JCV VP1                | 6   | 32589842  | rs9271525   | G       | A     | 10.73             | 0.15               | 3a                | 35          | 49      | 8           | 15    | 14          | 4        |
|                        | 3   | 18238783  | rs776170649 | CT      | C     | 15.61             | 0.35               | 6                 | -           | -       | -           | -     | -           | -        |
| MCV VP1                | 5   | 138865423 | rs7444313   | G       | A     | 1.89              | 0.36               | 6                 | 7           | 31      | -           | -     | 3           | -        |
|                        | 6   | 32429277  | rs9268847   | A       | G     | 5.57              | 0.18               | 7                 | 16          | 28      | -           | -     | 8           | -        |

<sup>1</sup> Combined Annotation Dependent Depletion (CADD) score: >10 corresponds to the top 10% most deleterious substitutions in the genome

<sup>2</sup> Score: ranges from 0 to 1, with 1 being most likely to be a regulatory variant. This score is based on a model that integrates functional genomics features with continuous values such as ChIP-seq signal, DNase-seq signal, information content change, and DeepSEA scores

<sup>3</sup> Rank: 1f = eQTL + TF binding / DNase peak; 2b = TF binding + any motif + DNase Footprint + DNase peak; 3a = TF binding + any motif + DNase peak; 4 = TF binding + DNase peak; 5 = TF binding or DNase peak; 6 or greater = minimal evidence

**Table S4:** Significant effects ( $P < 5.0 \times 10^{-8}$ ) on plasma protein levels (pQTL) observed for genome-wide significant variants for viral antigen IgG levels using data from the Human Plasma Proteome atlas.

| Phenotype                                       | Variant              | Target Protein                                            | $P_{pQTL}$            | Source Dataset [PMID] |
|-------------------------------------------------|----------------------|-----------------------------------------------------------|-----------------------|-----------------------|
| EBV<br>EA-D                                     | rs34825357           | Glutamate receptor 4                                      | $1.5 \times 10^{-28}$ | Sun et al. [29875488] |
|                                                 |                      | T-cell surface protein tactile                            | $6.5 \times 10^{-21}$ |                       |
|                                                 |                      | Complement C4                                             | $1.2 \times 10^{-20}$ |                       |
|                                                 |                      | cAMP-specific 3,5-cyclic phosphodiesterase 4D             | $2.8 \times 10^{-20}$ |                       |
|                                                 |                      | HLA class II histocompatibility antigen, DQ alpha 2 chain | $1.1 \times 10^{-19}$ |                       |
|                                                 |                      | Vesicle-fusing ATPase                                     | $5.9 \times 10^{-12}$ |                       |
|                                                 |                      | Beta-defensin 119                                         | $1.0 \times 10^{-10}$ |                       |
|                                                 |                      | Killer cell immunoglobulin-like receptor 2DS2             | $4.0 \times 10^{-10}$ |                       |
|                                                 |                      | Interleukin-21                                            | $4.6 \times 10^{-10}$ |                       |
|                                                 |                      | GDH/6PGL endoplasmic bifunctional protein                 | $5.9 \times 10^{-10}$ |                       |
|                                                 |                      | MHC class I polypeptide-related sequence B                | $8.3 \times 10^{-10}$ |                       |
| Trypsin-3                                       | $2.9 \times 10^{-8}$ |                                                           |                       |                       |
| EBV<br>EBNA                                     | rs9269233            | HLA class II histocompatibility antigen, DQ alpha 2 chain | $2.0 \times 10^{-21}$ | Sun et al. [29875488] |
|                                                 |                      | GDH/6PGL endoplasmic bifunctional protein                 | $3.2 \times 10^{-13}$ |                       |
|                                                 |                      | Killer cell immunoglobulin-like receptor 2DS2             | $1.3 \times 10^{-10}$ |                       |
|                                                 |                      | Ameloblastin                                              | $3.7 \times 10^{-8}$  |                       |
| EBV<br>ZEBRA                                    | rs9274728            | Complement C4                                             | $6.9 \times 10^{-16}$ | Sun et al. [29875488] |
|                                                 |                      | MHC class I polypeptide-related sequence B                | $6.6 \times 10^{-11}$ |                       |
|                                                 |                      | Interleukin-21                                            | $2.2 \times 10^{-10}$ |                       |
|                                                 |                      | Ubiquitin carboxyl-terminal hydrolase 25                  | $8.9 \times 10^{-10}$ |                       |
|                                                 |                      | T-cell surface protein tactile                            | $3.8 \times 10^{-8}$  |                       |
| HSV1                                            | rs1130420            | Trypsin-3                                                 | $7.2 \times 10^{-15}$ | Sun et al. [29875488] |
|                                                 |                      | Rac GTPase-activating protein 1                           | $1.7 \times 10^{-13}$ |                       |
| VZV                                             | rs9273325            | HLA class II histocompatibility antigen, DQ alpha 2 chain | $4.9 \times 10^{-38}$ | Sun et al. [29875488] |
|                                                 |                      | Glutamate receptor 4                                      | $6.8 \times 10^{-26}$ |                       |
|                                                 |                      | cAMP-specific 3,5-cyclic phosphodiesterase 4D             | $1.7 \times 10^{-24}$ |                       |
|                                                 |                      | MHC class I polypeptide-related sequence B                | $8.3 \times 10^{-22}$ |                       |
|                                                 |                      | Complement C4                                             | $2.0 \times 10^{-18}$ |                       |
|                                                 |                      | T-cell surface protein tactile                            | $7.6 \times 10^{-16}$ |                       |
|                                                 |                      | Trypsin-3                                                 | $2.0 \times 10^{-13}$ |                       |
|                                                 |                      | Rac GTPase-activating protein 1                           | $4.5 \times 10^{-11}$ |                       |
|                                                 |                      | Beta-defensin 119                                         | $3.6 \times 10^{-10}$ |                       |
|                                                 |                      | Interleukin-21                                            | $1.9 \times 10^{-9}$  |                       |
|                                                 |                      | Tenascin-X                                                | $2.0 \times 10^{-9}$  |                       |
|                                                 |                      | Ubiquitin-like protein ISG15                              | $3.9 \times 10^{-9}$  |                       |
|                                                 |                      | Palmitoyl-protein thioesterase 1                          | $4.5 \times 10^{-9}$  |                       |
| Polypeptide N-acetylgalactosaminyltransferase 1 | $4.6 \times 10^{-9}$ |                                                           |                       |                       |
| Coiled-coil domain-containing protein 134       | $4.6 \times 10^{-8}$ |                                                           |                       |                       |

|               |                      |                                                                         |                        |                             |
|---------------|----------------------|-------------------------------------------------------------------------|------------------------|-----------------------------|
| BKV           | rs681343             | Protein FAM3D                                                           | $1.8 \times 10^{-110}$ | Sun et al. [29875488]       |
|               |                      | Golgi membrane protein 1                                                | $1.5 \times 10^{-28}$  |                             |
|               |                      | C-C motif chemokine 15                                                  | $2.2 \times 10^{-27}$  |                             |
|               |                      | Transcobalamin-1                                                        | $1.8 \times 10^{-21}$  | Yao et al. [30111768]       |
|               |                      | Secreted and transmembrane protein 1                                    | $7.2 \times 10^{-20}$  |                             |
|               |                      | Lithostathine-1-alpha                                                   | $2.3 \times 10^{-18}$  |                             |
|               |                      | Protein FAM177A1                                                        | $5.5 \times 10^{-18}$  | Sun et al. [29875488]       |
|               |                      | Galactoside 3(4)-L-fucosyltransferase                                   | $4.0 \times 10^{-16}$  |                             |
|               |                      | Intestinal-type alkaline phosphatase                                    | $1.3 \times 10^{-15}$  |                             |
|               |                      | C-C motif chemokine 25                                                  | $1.4 \times 10^{-13}$  | Sun et al. [29875488]       |
|               |                      | Fibroblast growth factor 19 (FGF19)                                     | $2.6 \times 10^{-13}$  |                             |
|               |                      | BPI fold-containing family B member 1 (BPIFB1)                          | $5.4 \times 10^{-10}$  |                             |
|               |                      | N-acetyllactosaminide beta-1,3-N-acetylglucosaminyltransferase 2 (FUT3) | $6.8 \times 10^{-9}$   | Sun et al. [29875488]       |
|               |                      | Lactase-phlorizin hydrolase                                             | $1.2 \times 10^{-8}$   | Folkersen et al. [28369058] |
|               |                      | Tissue factor                                                           | $8.7 \times 10^{-9}$   |                             |
| Stromelysin-2 | $3.5 \times 10^{-8}$ |                                                                         |                        |                             |
| JCV           | rs9271525            | GDH/6PGL endoplasmic bifunctional protein                               | $4.2 \times 10^{-26}$  | Sun et al. [29875488]       |
|               |                      | Killer cell immunoglobulin-like receptor 2DS2                           | $2.2 \times 10^{-11}$  |                             |
|               |                      | Osteocalcin                                                             | $6.5 \times 10^{-9}$   |                             |
|               |                      | Complement factor B                                                     | $3.1 \times 10^{-8}$   |                             |

**Table S5:** Odds ratios (OR) for the effect of top seroreactivity variants on selected cancers, schizophrenia, and Alzheimer's disease (AD). Associations with  $P < 7.3 \times 10^{-4}$  were considered statistically significant after Bonferroni correction for the number of genetic variants and phenotypes tested.

| Antigen | Chr                | Position | Variant   | Alleles                  |       | Effect on antibody response (MFI) |        | Hematologic cancers <sup>1</sup> |       | Melanoma             |       | Schizophrenia <sup>2</sup> |       | AD <sup>3</sup>       |                      |
|---------|--------------------|----------|-----------|--------------------------|-------|-----------------------------------|--------|----------------------------------|-------|----------------------|-------|----------------------------|-------|-----------------------|----------------------|
|         |                    |          |           | Effect                   | Other | Beta                              | (SE)   | OR                               | P     | OR                   | P     | OR                         | P     | P                     |                      |
| CMV     | pp52               | 6        | 32301427  | rs115378818              | C     | T                                 | 0.633  | (0.095)                          | 0.809 | 0.058                | 0.886 | 0.12                       | 0.989 | 0.84                  | 0.44                 |
| EBV     | EA-D               | 6        | 32665840  | rs34825357 <sup>†</sup>  | T     | TC                                | -0.114 | (0.017)                          | 0.978 | 0.45                 | 1.054 | 0.017                      | 0.960 | $2.7 \times 10^{-4}$  | 0.75                 |
| EBV     | EBNA               | 3        | 151114852 | rs67886110*              | G     | T                                 | 0.103  | (0.017)                          | 0.960 | 0.11                 | 0.993 | 0.68                       | 1.023 | 0.037                 | 0.068                |
|         |                    | 6        | 32451762  | rs9269233 <sup>†</sup>   | A     | C                                 | 0.315  | (0.019)                          | 0.878 | $2.7 \times 10^{-4}$ | 1.078 | $2.8 \times 10^{-3}$       | 1.034 | $6.2 \times 10^{-3}$  | 0.28                 |
| EBV     | VCA p18            | 6        | 31486158  | 6:31486158 <sup>†</sup>  | GT    | G                                 | 0.197  | (0.018)                          | 0.921 | $6.1 \times 10^{-3}$ | 0.993 | 0.75                       | 1.030 | 0.020                 | 0.016                |
| EBV     | ZEBRA              | 6        | 32637772  | rs9274728                | A     | G                                 | -0.315 | (0.018)                          | 0.975 | 0.35                 | 1.060 | $3.3 \times 10^{-3}$       | 0.993 | 0.59                  | $1.7 \times 10^{-3}$ |
| HHV6    | IE1A               | 7        | 139985625 | rs2429218                | T     | C                                 | 0.106  | (0.019)                          | 1.035 | 0.19                 | 0.990 | 0.58                       | 1.024 | 0.041                 | 0.24                 |
|         |                    | 6        | 32602665  | rs139299944              | C     | CT                                | 0.114  | (0.017)                          | 1.079 | $4.1 \times 10^{-3}$ | 0.986 | 0.43                       | 0.990 | 0.38                  | -                    |
| HHV7    | U14                | 11       | 118767564 | rs75438046               | G     | A                                 | 0.280  | (0.049)                          | 0.913 | 0.22                 | 0.919 | 0.11                       | 0.955 | 0.18                  | $4.1 \times 10^{-3}$ |
|         |                    | 17       | 45794706  | rs1808192 <sup>†</sup>   | A     | G                                 | -0.099 | (0.017)                          | 0.989 | 0.69                 | 0.981 | 0.32                       | 1.000 | 0.99                  | 0.029                |
| HSV1    | 1gG                | 6        | 32627852  | rs1130420 <sup>†</sup>   | G     | A                                 | -0.122 | (0.019)                          | 0.888 | $3.5 \times 10^{-6}$ | 1.023 | 0.22                       | 1.055 | $1.8 \times 10^{-5}$  | $1.2 \times 10^{-4}$ |
|         |                    | 10       | 91189187  | rs11203123 <sup>†*</sup> | A     | C                                 | 0.512  | (0.093)                          | 0.948 | 0.71                 | 0.966 | 0.75                       | 0.985 | 0.70                  | 0.85                 |
| VZV     | gE/Ig <sup>1</sup> | 6        | 32623193  | rs9273325                | G     | A                                 | -0.232 | (0.021)                          | 0.876 | $4.4 \times 10^{-5}$ | 0.965 | 0.12                       | 1.131 | $4.3 \times 10^{-15}$ | 0.16                 |
| BKV     | VP1                | 19       | 49206462  | rs681343                 | C     | T                                 | -0.125 | (0.016)                          | 1.004 | 0.87                 | 1.037 | 0.040                      | 0.960 | $2.5 \times 10^{-4}$  | 0.16                 |
| JCV     | VP1                | 6        | 32589842  | rs9271525                | G     | A                                 | -0.318 | (0.031)                          | 0.925 | 0.026                | 1.015 | 0.53                       | 1.060 | $6.8 \times 10^{-5}$  | $4.7 \times 10^{-3}$ |
|         |                    | 3        | 18238783  | rs776170649 <sup>†</sup> | CT    | C                                 | -0.134 | (0.024)                          | 1.006 | 0.86                 | 0.975 | 0.23                       | 1.045 | $9.0 \times 10^{-4}$  | 0.83                 |
| MCV     | VP1                | 5        | 138865423 | rs7444313                | G     | A                                 | 0.169  | (0.021)                          | 0.957 | 0.13                 | 1.026 | 0.21                       | 1.019 | 0.12                  | 0.033                |
|         |                    | 6        | 32429277  | rs9268847                | A     | G                                 | -0.195 | (0.022)                          | 1.018 | 0.54                 | 0.949 | $8.3 \times 10^{-3}$       | 0.968 | $8.4 \times 10^{-3}$  | 0.14                 |

<sup>1</sup> Cancer types included: non-Hodgkin lymphoma and lymphocytic leukemia

<sup>2</sup> Estimates obtained from a meta-analysis of the UK Biobank and Genetic Epidemiology Research on Aging cohorts [Rashkin et al. (2019) *bioRxiv* 635367]

<sup>3</sup> Summary statistics for European ancestry subjects were obtained from Lam, Chen et al. *Nat Genet.* (2019) 51(12):1670-1678 [PMID: 31740837]

<sup>4</sup> Summary statistics obtained from Jun et al. *Mol Psychiatry.* (2016) 21(1):108-17 [PMID: 25778476]

<sup>†</sup> Proxies for unavailable variants: rs2647006 for rs34825357 (schizophrenia and AD; LD  $r^2=0.99$ ); rs7755774 for rs9269233 (AD; LD  $r^2=0.71$ ); rs3093986 for 6:31486158\_GT\_G (AD; LD  $r^2=0.74$ ); rs7219420 for rs1808192 (AD; LD  $r^2=0.87$ ); rs4713572 for rs1130420 (AD; LD  $r^2=0.91$ ); rs11203124 for rs11203123 (AD; LD  $r^2=1.00$ ); rs7618405 for rs776170649 (AD; LD  $r^2=0.99$ )

\* Multi-allelic variants: rs67886110 (G/T and G/C) and rs11203123 (A/C and A/AC)

**Table S6:** Independent sentinel variants in the HLA region identified by clumping (LD  $r^2 < 0.05 \pm 500\text{kb}$ ) associations with  $P < 5 \times 10^{-8}$  for each antigen response phenotype.

| Antigen  | Chr     | Position | Variant     | Alleles   |       | EAF   | Beta   | (SE)    | P                     | INFO                  | Clump Size <sup>1</sup> |
|----------|---------|----------|-------------|-----------|-------|-------|--------|---------|-----------------------|-----------------------|-------------------------|
|          |         |          |             | Effect    | Other |       |        |         |                       |                       |                         |
| CMV pp52 | 6       | 32301427 | rs115378818 | C         | T     | 0.986 | 0.633  | (0.095) | $2.8 \times 10^{-11}$ | 0.731                 | 2                       |
|          | 6       | 32665840 | rs34825357  | T         | TC    | 0.409 | -0.114 | (0.017) | $2.0 \times 10^{-11}$ | 0.998                 | 779                     |
| EBV EA-D | 6       | 31451370 | rs3132470   | A         | G     | 0.855 | 0.159  | (0.024) | $3.4 \times 10^{-11}$ | 1.000                 | 207                     |
|          | 6       | 29842444 | rs1611657   | G         | A     | 0.458 | 0.105  | (0.017) | $6.9 \times 10^{-10}$ | 0.996                 | 19                      |
|          | 6       | 32583876 | rs117503706 | G         | A     | 0.986 | -0.423 | (0.072) | $4.8 \times 10^{-9}$  | 0.912                 | 15                      |
|          | 6       | 30764907 | rs1264377   | G         | A     | 0.818 | 0.119  | (0.022) | $4.7 \times 10^{-8}$  | 1                     | 0                       |
|          | 6       | 32451762 | rs9269233   | A         | C     | 0.249 | 0.315  | (0.019) | $3.5 \times 10^{-61}$ | 0.961                 | 3885                    |
| EBV EBNA | 6       | 32628432 | rs9273507   | A         | G     | 0.570 | 0.167  | (0.017) | $7.5 \times 10^{-23}$ | 0.994                 | 228                     |
|          | 6       | 31884823 | rs3130682   | T         | C     | 0.148 | 0.220  | (0.023) | $3.0 \times 10^{-21}$ | 0.993                 | 269                     |
|          | 6       | 32390436 | rs143810596 | T         | G     | 0.977 | -0.538 | (0.058) | $1.3 \times 10^{-20}$ | 0.989                 | 51                      |
|          | 6       | 31297772 | rs9265517   | C         | T     | 0.233 | 0.172  | (0.020) | $4.5 \times 10^{-18}$ | 0.975                 | 967                     |
|          | 6       | 33048628 | rs1042136   | A         | C     | 0.838 | 0.176  | (0.023) | $1.3 \times 10^{-14}$ | 0.991                 | 158                     |
|          | 6       | 31835164 | rs693906    | G         | C     | 0.842 | 0.177  | (0.023) | $2.0 \times 10^{-14}$ | 0.984                 | 130                     |
|          | 6       | 31892641 | rs9267677   | T         | C     | 0.905 | 0.206  | (0.028) | $3.6 \times 10^{-13}$ | 1                     | 58                      |
|          | 6       | 32201469 | rs41315395  | C         | A     | 0.855 | -0.167 | (0.023) | $1.2 \times 10^{-12}$ | 0.997                 | 3                       |
|          | 6       | 32387809 | rs2395163   | T         | C     | 0.779 | 0.144  | (0.020) | $2.0 \times 10^{-12}$ | 1                     | 25                      |
|          | 6       | 29822779 | 6:29822779  | AAAAC     | A     | 0.365 | 0.114  | (0.017) | $4.1 \times 10^{-11}$ | 0.999                 | 113                     |
|          | 6       | 33083096 | rs6457714   | T         | A     | 0.789 | -0.132 | (0.020) | $6.8 \times 10^{-11}$ | 0.997                 | 35                      |
|          | 6       | 32609147 | rs12722051  | A         | T     | 0.795 | 0.127  | (0.021) | $1.3 \times 10^{-9}$  | 0.989                 | 7                       |
|          | 6       | 31198786 | rs3130935   | A         | G     | 0.621 | 0.098  | (0.017) | $1.5 \times 10^{-8}$  | 1.000                 | 7                       |
|          | 6       | 32623017 | rs28468461  | T         | C     | 0.969 | -0.256 | (0.046) | $2.9 \times 10^{-8}$  | 0.993                 | 0                       |
|          | 6       | 32542378 | rs116206645 | T         | A     | 0.979 | 0.403  | (0.074) | $5.0 \times 10^{-8}$  | 0.699                 | 0                       |
|          | 6       | 31486158 | 6:31486158  | GT        | G     | 0.245 | 0.197  | (0.018) | $7.1 \times 10^{-27}$ | 0.994                 | 1651                    |
|          | 6       | 32589978 | rs9271536   | A         | T     | 0.179 | 0.200  | (0.020) | $3.9 \times 10^{-23}$ | 0.999                 | 2455                    |
|          | 6       | 32069806 | rs3096695   | G         | C     | 0.145 | 0.208  | (0.022) | $1.6 \times 10^{-20}$ | 0.997                 | 16                      |
|          | 6       | 30921417 | 6:30921417  | GA        | G     | 0.119 | 0.165  | (0.025) | $2.7 \times 10^{-11}$ | 0.975                 | 42                      |
|          | EBV p18 | 6        | 30727983    | rs3095339 | A     | G     | 0.722  | 0.112   | (0.017)               | $7.3 \times 10^{-11}$ | 1.000                   |
| 6        |         | 32797876 | rs241436    | A         | G     | 0.549 | 0.099  | (0.016) | $2.4 \times 10^{-10}$ | 1                     | 2                       |
| 6        |         | 31379391 | rs3828879   | C         | T     | 0.876 | 0.147  | (0.024) | $5.1 \times 10^{-10}$ | 1.000                 | 3                       |
| 6        |         | 32206539 | rs3134937   | C         | T     | 0.751 | 0.112  | (0.018) | $6.3 \times 10^{-10}$ | 0.981                 | 20                      |
| 6        |         | 33073440 | rs2064475   | G         | A     | 0.768 | 0.111  | (0.019) | $2.2 \times 10^{-9}$  | 1.000                 | 21                      |
| 6        |         | 32045864 | rs781341398 | GAA       | G     | 0.966 | -0.277 | (0.046) | $2.7 \times 10^{-9}$  | 0.922                 | 2                       |
| 6        |         | 32754876 | rs116309362 | T         | C     | 0.976 | -0.335 | (0.057) | $3.5 \times 10^{-9}$  | 0.895                 | 1                       |
| 6        |         | 26370707 | rs9379862   | T         | C     | 0.743 | 0.103  | (0.018) | $5.6 \times 10^{-9}$  | 1.000                 | 1                       |
| 6        |         | 31448564 | rs3099843   | G         | T     | 0.855 | 0.126  | (0.022) | $1.1 \times 10^{-8}$  | 1.000                 | 12                      |
| 6        |         | 31362207 | rs1052409   | T         | C     | 0.845 | 0.125  | (0.022) | $1.2 \times 10^{-8}$  | 0.978                 | 7                       |
| 6        |         | 28039586 | rs4713135   | G         | A     | 0.761 | 0.102  | (0.019) | $3.4 \times 10^{-8}$  | 1                     | 0                       |
| 6        |         | 32637772 | rs9274728   | A         | G     | 0.718 | -0.315 | (0.018) | $4.7 \times 10^{-67}$ | 0.995                 | 3836                    |



|              |          |            |             |             |       |       |         |                      |                       |                       |       |      |
|--------------|----------|------------|-------------|-------------|-------|-------|---------|----------------------|-----------------------|-----------------------|-------|------|
| EBV<br>ZEBRA | 6        | 32045864   | rs781341398 | GAA         | G     | 0.966 | -0.428  | (0.048)              | $5.1 \times 10^{-19}$ | 0.922                 | 20    |      |
|              | 6        | 32211085   | rs412657    | T           | G     | 0.622 | 0.145   | (0.017)              | $1.0 \times 10^{-17}$ | 1                     | 321   |      |
|              | 6        | 32774954   | rs6917611   | G           | C     | 0.608 | 0.142   | (0.017)              | $1.9 \times 10^{-17}$ | 1.000                 | 198   |      |
|              | 6        | 32634588   | rs113140854 | C           | T     | 0.983 | -0.534  | (0.067)              | $1.5 \times 10^{-15}$ | 0.827                 | 253   |      |
|              | 6        | 31672242   | rs28366157  | A           | G     | 0.937 | -0.266  | (0.034)              | $2.3 \times 10^{-15}$ | 0.997                 | 374   |      |
|              | 6        | 31418810   | rs3131623   | T           | A     | 0.817 | 0.167   | (0.021)              | $2.6 \times 10^{-15}$ | 0.992                 | 610   |      |
|              | 6        | 29923351   | rs2904758   | G           | A     | 0.280 | 0.144   | (0.018)              | $5.0 \times 10^{-15}$ | 0.990                 | 97    |      |
|              | 6        | 32635948   | rs541213498 | C           | T     | 0.987 | -0.586  | (0.078)              | $4.8 \times 10^{-14}$ | 0.780                 | 5     |      |
|              | 6        | 32626702   | rs35779483  | A           | G     | 0.693 | -0.135  | (0.018)              | $6.1 \times 10^{-14}$ | 0.999                 | 33    |      |
|              | 6        | 30820373   | rs2263298   | C           | T     | 0.849 | 0.154   | (0.023)              | $2.4 \times 10^{-11}$ | 1.000                 | 200   |      |
|              | 6        | 33017502   | rs3130177   | G           | A     | 0.717 | -0.121  | (0.018)              | $3.1 \times 10^{-11}$ | 0.996                 | 5     |      |
|              | 6        | 31150844   | rs138206303 | A           | AGT   | 0.883 | -0.167  | (0.025)              | $4.8 \times 10^{-11}$ | 0.975                 | 22    |      |
|              | 6        | 31928799   | rs419788    | T           | C     | 0.324 | -0.113  | (0.017)              | $1.0 \times 10^{-10}$ | 1                     | 8     |      |
|              | 6        | 32581008   | rs3129747   | T           | C     | 0.698 | -0.108  | (0.018)              | $1.2 \times 10^{-9}$  | 0.989                 | 8     |      |
|              | 6        | 30434999   | rs2516670   | G           | A     | 0.160 | 0.132   | (0.022)              | $3.3 \times 10^{-9}$  | 1                     | 2     |      |
|              | 6        | 33045823   | rs2073520   | A           | G     | 0.868 | 0.145   | (0.025)              | $5.7 \times 10^{-9}$  | 0.972                 | 1     |      |
|              | 6        | 32707395   | rs28371351  | G           | A     | 0.988 | -0.519  | (0.095)              | $4.2 \times 10^{-8}$  | 0.647                 | 0     |      |
|              | HHV7     | 6          | 32602665    | rs139299944 | C     | CT    | 0.655   | 0.114                | (0.017)               | $1.5 \times 10^{-11}$ | 0.998 | 437  |
| HSV1         | 6        | 32627852   | rs1130420   | G           | A     | 0.583 | -0.122  | (0.019)              | $2.5 \times 10^{-10}$ | 0.976                 | 61    |      |
| VZV          | 6        | 32623193   | rs9273325   | G           | A     | 0.831 | -0.232  | (0.021)              | $8.2 \times 10^{-28}$ | 0.998                 | 2708  |      |
|              | 6        | 31323506   | rs4990036   | C           | T     | 0.851 | -0.240  | (0.023)              | $4.5 \times 10^{-26}$ | 0.997                 | 972   |      |
|              | 6        | 32014828   | rs433061    | G           | A     | 0.869 | -0.249  | (0.024)              | $6.5 \times 10^{-26}$ | 0.999                 | 69    |      |
|              | 6        | 30743729   | rs3130668   | G           | A     | 0.855 | -0.228  | (0.023)              | $1.9 \times 10^{-22}$ | 0.978                 | 271   |      |
|              | 6        | 29986324   | rs3115631   | T           | A     | 0.873 | -0.229  | (0.025)              | $4.1 \times 10^{-20}$ | 0.955                 | 1442  |      |
|              | 6        | 29356331   | rs9257809   | A           | G     | 0.875 | -0.216  | (0.024)              | $1.5 \times 10^{-18}$ | 1                     | 147   |      |
|              | 6        | 28734676   | rs1233604   | G           | A     | 0.882 | -0.215  | (0.025)              | $2.5 \times 10^{-17}$ | 1                     | 291   |      |
|              | 6        | 28214698   | rs17720293  | C           | T     | 0.866 | -0.191  | (0.024)              | $2.1 \times 10^{-15}$ | 1                     | 192   |      |
|              | 6        | 27556141   | rs13201294  | A           | T     | 0.870 | -0.182  | (0.024)              | $7.1 \times 10^{-14}$ | 0.996                 | 94    |      |
|              | 6        | 26743531   | rs13211434  | G           | C     | 0.878 | -0.188  | (0.025)              | $1.1 \times 10^{-13}$ | 0.938                 | 241   |      |
|              | 6        | 26189356   | rs13204572  | G           | C     | 0.896 | -0.166  | (0.027)              | $5.8 \times 10^{-10}$ | 0.996                 | 37    |      |
|              | 6        | 32589842   | rs9271525   | G           | A     | 0.163 | -0.137  | (0.022)              | $1.0 \times 10^{-9}$  | 0.977                 | 229   |      |
|              | 6        | 30020252   | rs546626159 | A           | ATT   | 0.749 | 0.108   | (0.020)              | $3.0 \times 10^{-8}$  | 0.968                 | 0     |      |
|              | JCV      | 6          | 32589842    | rs9271525   | G     | A     | 0.163   | -0.318               | (0.031)               | $3.9 \times 10^{-24}$ | 0.977 | 2335 |
|              |          | 6          | 32080146    | rs3130342   | A     | C     | 0.149   | -0.245               | (0.032)               | $1.3 \times 10^{-14}$ | 1     | 43   |
|              |          | 6          | 31574306    | rs372079459 | T     | TAA   | 0.198   | -0.163               | (0.028)               | $5.0 \times 10^{-9}$  | 0.972 | 2    |
|              | MCV      | 6          | 32429277    | rs9268847   | A     | G     | 0.750   | -0.195               | (0.022)               | $2.4 \times 10^{-19}$ | 0.995 | 2450 |
|              |          | 6          | 32760665    | rs113322198 | C     | CACTT | 0.224   | -0.196               | (0.024)               | $2.3 \times 10^{-16}$ | 0.996 | 328  |
| 6            |          | 32232358   | rs9268070   | T           | C     | 0.149 | -0.216  | (0.029)              | $5.0 \times 10^{-14}$ | 0.999                 | 38    |      |
| 6            |          | 29924127   | rs148584120 | T           | C     | 0.958 | 0.375   | (0.052)              | $7.7 \times 10^{-13}$ | 0.972                 | 160   |      |
| 6            |          | 30475514   | 6:30475514  | TGTGC       | T     | 0.959 | 0.320   | (0.052)              | $9.6 \times 10^{-10}$ | 0.966                 | 10    |      |
| 6            |          | 31561211   | rs2736190   | T           | C     | 0.269 | -0.134  | (0.022)              | $2.1 \times 10^{-9}$  | 0.993                 | 5     |      |
| 6            | 27763714 | rs76148407 | C           | G           | 0.966 | 0.299 | (0.055) | $4.8 \times 10^{-8}$ | 0.971                 | 0                     |       |      |

**Table S7:** Forty independent sentinel variants in the HLA region identified by clumping (LD  $r^2 < 0.05$   $\pm 500$ kb) associations with  $P < 5 \times 10^{-8}$  across 10 antigen response phenotypes.

| Primary Phenotype | Chr | Position | Variant     | Alleles |       | EAF   | Beta   | (SE)    | P                     | INFO  | Clump Size <sup>1</sup> |
|-------------------|-----|----------|-------------|---------|-------|-------|--------|---------|-----------------------|-------|-------------------------|
|                   |     |          |             | Effect  | Other |       |        |         |                       |       |                         |
| EBV ZEBRA         | 6   | 32637772 | rs9274728   | G       | A     | 0.718 | -0.315 | (0.018) | $4.7 \times 10^{-67}$ | 0.995 | 14065                   |
| EBV EBNA          | 6   | 32633879 | rs9274490   | G       | A     | 0.742 | 0.259  | (0.019) | $1.6 \times 10^{-40}$ | 0.997 | 4788                    |
| EBV EBNA          | 6   | 32608521 | rs6907155   | A       | C     | 0.907 | -0.317 | (0.029) | $2.9 \times 10^{-27}$ | 0.945 | 152                     |
| EBV p18           | 6   | 31486158 | 6:31486158  | G       | GT    | 0.245 | 0.197  | (0.018) | $7.1 \times 10^{-27}$ | 0.994 | 4087                    |
| VZV               | 6   | 31323506 | rs4990036   | T       | C     | 0.851 | -0.240 | (0.023) | $4.5 \times 10^{-26}$ | 0.997 | 1022                    |
| VZV               | 6   | 32014828 | rs433061    | A       | G     | 0.869 | -0.249 | (0.024) | $6.5 \times 10^{-26}$ | 0.999 | 323                     |
| VZV               | 6   | 30743729 | rs3130668   | A       | G     | 0.855 | -0.228 | (0.023) | $1.9 \times 10^{-22}$ | 0.978 | 509                     |
| EBV EBNA          | 6   | 32006317 | rs6468      | T       | C     | 0.197 | 0.195  | (0.021) | $1.4 \times 10^{-20}$ | 0.963 | 353                     |
| VZV               | 6   | 29986324 | rs3115631   | A       | T     | 0.873 | -0.229 | (0.025) | $4.1 \times 10^{-20}$ | 0.955 | 1499                    |
| EBV ZEBRA         | 6   | 32045864 | rs781341398 | G       | GAA   | 0.966 | -0.428 | (0.048) | $5.1 \times 10^{-19}$ | 0.922 | 9                       |
| VZV               | 6   | 29356331 | rs9257809   | G       | A     | 0.875 | -0.216 | (0.024) | $1.5 \times 10^{-18}$ | 1     | 147                     |
| EBV p18           | 6   | 32786917 | rs3763354   | A       | G     | 0.225 | 0.160  | (0.018) | $4.6 \times 10^{-18}$ | 1     | 687                     |
| VZV               | 6   | 28734676 | rs1233604   | A       | G     | 0.882 | -0.215 | (0.025) | $2.5 \times 10^{-17}$ | 1     | 291                     |
| EBV ZEBRA         | 6   | 32634588 | rs113140854 | T       | C     | 0.983 | -0.534 | (0.067) | $1.5 \times 10^{-15}$ | 0.827 | 257                     |
| VZV               | 6   | 28214698 | rs17720293  | T       | C     | 0.866 | -0.191 | (0.024) | $2.1 \times 10^{-15}$ | 1     | 193                     |
| EBV ZEBRA         | 6   | 31672242 | rs28366157  | G       | A     | 0.937 | -0.266 | (0.034) | $2.3 \times 10^{-15}$ | 0.997 | 197                     |
| EBV EBNA          | 6   | 33048628 | rs1042136   | C       | A     | 0.838 | 0.176  | (0.023) | $1.3 \times 10^{-14}$ | 0.991 | 185                     |
| MCV               | 6   | 32630837 | 6:32630837  | T       | G     | 0.891 | -0.233 | (0.030) | $1.5 \times 10^{-14}$ | 0.959 | 162                     |
| EBV EBNA          | 6   | 32551368 | rs138008524 | G       | A     | 0.985 | -0.625 | (0.081) | $1.9 \times 10^{-14}$ | 0.666 | 0                       |
| EBV ZEBRA         | 6   | 32635948 | rs541213498 | T       | C     | 0.987 | -0.586 | (0.078) | $4.8 \times 10^{-14}$ | 0.780 | 2                       |
| VZV               | 6   | 27556141 | rs13201294  | T       | A     | 0.870 | -0.182 | (0.024) | $7.1 \times 10^{-14}$ | 0.996 | 94                      |
| VZV               | 6   | 26743531 | rs13211434  | C       | G     | 0.878 | -0.188 | (0.025) | $1.1 \times 10^{-13}$ | 0.938 | 243                     |
| EBV ZEBRA         | 6   | 29796768 | rs1632940   | C       | T     | 0.227 | 0.145  | (0.020) | $2.3 \times 10^{-13}$ | 0.991 | 268                     |
| EBV EBNA          | 6   | 31892641 | rs9267677   | C       | T     | 0.905 | 0.206  | (0.028) | $3.6 \times 10^{-13}$ | 1     | 53                      |
| EBV p18           | 6   | 30921417 | 6:30921417  | G       | GA    | 0.119 | 0.165  | (0.025) | $2.7 \times 10^{-11}$ | 0.975 | 40                      |
| EBV EBNA          | 6   | 32598090 | rs1281943   | C       | T     | 0.913 | 0.211  | (0.032) | $4.0 \times 10^{-11}$ | 0.919 | 16                      |
| EBV ZEBRA         | 6   | 31150844 | rs138206303 | AGT     | A     | 0.883 | -0.167 | (0.025) | $4.8 \times 10^{-11}$ | 0.975 | 31                      |
| MCV               | 6   | 30364587 | rs2516687   | T       | A     | 0.960 | 0.341  | (0.052) | $5.3 \times 10^{-11}$ | 1     | 26                      |
| EBV EBNA          | 6   | 33083096 | rs6457714   | A       | T     | 0.789 | -0.132 | (0.020) | $6.8 \times 10^{-11}$ | 0.997 | 39                      |
| VZV               | 6   | 32853288 | rs2244447   | G       | C     | 0.592 | -0.106 | (0.017) | $2.9 \times 10^{-10}$ | 0.995 | 3                       |
| EBV EBNA          | 6   | 32965942 | rs176248    | A       | G     | 0.707 | 0.115  | (0.018) | $3.2 \times 10^{-10}$ | 1     | 1                       |
| EBV p18           | 6   | 31379391 | rs3828879   | T       | C     | 0.876 | 0.147  | (0.024) | $5.1 \times 10^{-10}$ | 1.000 | 0                       |
| VZV               | 6   | 26189356 | rs13204572  | C       | G     | 0.896 | -0.166 | (0.027) | $5.8 \times 10^{-10}$ | 0.996 | 37                      |
| EBV EA-D          | 6   | 32583876 | rs117503706 | A       | G     | 0.986 | -0.423 | (0.072) | $4.8 \times 10^{-9}$  | 0.912 | 15                      |
| EBV EBNA          | 6   | 32587835 | rs71542419  | A       | C     | 0.916 | -0.168 | (0.029) | $9.5 \times 10^{-9}$  | 0.973 | 6                       |
| EBV p18           | 6   | 31362207 | rs1052409   | C       | T     | 0.845 | 0.125  | (0.022) | $1.2 \times 10^{-8}$  | 0.978 | 7                       |
| EBV EBNA          | 6   | 32722961 | rs71565347  | A       | G     | 0.983 | 0.374  | (0.067) | $2.7 \times 10^{-8}$  | 0.991 | 3                       |

|           |   |          |             |   |   |       |        |         |                      |       |   |
|-----------|---|----------|-------------|---|---|-------|--------|---------|----------------------|-------|---|
| EBV ZEBRA | 6 | 32707395 | rs28371351  | A | G | 0.988 | -0.519 | (0.095) | $4.2 \times 10^{-8}$ | 0.647 | 0 |
| MCV       | 6 | 27763714 | rs76148407  | G | C | 0.966 | 0.299  | (0.055) | $4.8 \times 10^{-8}$ | 0.971 | 0 |
| EBV EBNA  | 6 | 32542378 | rs116206645 | A | T | 0.979 | 0.403  | (0.074) | $5.0 \times 10^{-8}$ | 0.699 | 0 |

<sup>1</sup> Clump size refers to the number of non-independent (LD  $r^2 > 0.05$ ) variants clumped together with the sentinel variant

**Table S8:** Conditionally independent genome-wide significant ( $P_{\text{cond}} < 5 \times 10^{-8}$ ) variants in the HLA identified through forward iterative conditional analyses for each antigen response phenotype.

| Antigen      | Round <sup>1</sup> | Chr | Position | Variant     | Alleles |       | EAF   | Beta   | (SE)    | $P_{\text{cond}}$     | INFO  |
|--------------|--------------------|-----|----------|-------------|---------|-------|-------|--------|---------|-----------------------|-------|
|              |                    |     |          |             | Effect  | Other |       |        |         |                       |       |
| EBV<br>EBNA  | 0                  | 6   | 32451762 | rs9269233   | A       | C     | 0.249 | 0.315  | (0.019) | $3.5 \times 10^{-61}$ | 0.961 |
|              | 1                  | 6   | 32602665 | rs139299944 | C       | CT    | 0.655 | -0.160 | (0.017) | $5.9 \times 10^{-21}$ | 0.998 |
|              | 2                  | 6   | 33045272 | rs6457711   | C       | A     | 0.752 | -0.129 | (0.019) | $1.3 \times 10^{-11}$ | 0.994 |
|              | 3                  | 6   | 32626019 | rs9273358   | C       | T     | 0.548 | 0.110  | (0.017) | $9.0 \times 10^{-11}$ | 0.996 |
|              | 4                  | 6   | 32626451 | rs28414666  | G       | A     | 0.789 | 0.221  | (0.035) | $4.8 \times 10^{-10}$ | 0.997 |
|              | 5                  | 6   | 33047612 | rs3097671   | G       | C     | 0.835 | 0.133  | (0.022) | $2.1 \times 10^{-9}$  | 1     |
| EBV<br>ZEBRA | 0                  | 6   | 32637772 | rs9274728   | A       | G     | 0.718 | -0.315 | (0.018) | $4.7 \times 10^{-67}$ | 0.995 |
|              | 1                  | 6   | 29923351 | rs2904758   | G       | A     | 0.280 | 0.115  | (0.018) | $2.2 \times 10^{-10}$ | 0.990 |
|              | 2                  | 6   | 33034507 | rs35683320  | G       | A     | 0.825 | 0.129  | (0.022) | $1.9 \times 10^{-9}$  | 0.982 |
|              | 3                  | 6   | 32783405 | rs1383258   | C       | T     | 0.962 | 0.235  | (0.042) | $3.3 \times 10^{-8}$  | 1.000 |
| EBV p18      | 0                  | 6   | 31486158 | 6:31486158  | GT      | G     | 0.245 | 0.197  | (0.018) | $7.1 \times 10^{-27}$ | 0.994 |
|              | 1                  | 6   | 31247169 | rs6917363   | G       | A     | 0.431 | 0.102  | (0.016) | $2.7 \times 10^{-10}$ | 0.999 |
|              | 2                  | 6   | 32582513 | rs9271325   | C       | G     | 0.527 | 0.099  | (0.016) | $7.3 \times 10^{-10}$ | 1.000 |
|              | 3                  | 6   | 31356536 | rs66479476  | A       | G     | 0.784 | 0.110  | (0.020) | $3.9 \times 10^{-8}$  | 0.963 |
| MCV          | 0                  | 6   | 32429277 | rs9268847   | A       | G     | 0.750 | -0.195 | (0.022) | $2.4 \times 10^{-19}$ | 0.995 |
|              | 1                  | 6   | 29924127 | rs148584120 | T       | C     | 0.958 | 0.350  | (0.052) | $1.6 \times 10^{-11}$ | 0.972 |
|              | 2                  | 6   | 32797488 | rs4148874   | C       | T     | 0.264 | -0.158 | (0.022) | $1.1 \times 10^{-12}$ | 1     |
| EBV EA-D     | 0                  | 6   | 32665840 | rs34825357  | T       | TC    | 0.409 | -0.114 | (0.017) | $2.0 \times 10^{-11}$ | 0.998 |
|              | 1                  | 6   | 32655730 | rs3129783   | A       | G     | 0.471 | 0.100  | (0.017) | $8.4 \times 10^{-9}$  | 0.980 |
| CMV pp52     | 0                  | 6   | 32301427 | rs115378818 | C       | T     | 0.978 | 0.633  | (0.095) | $2.8 \times 10^{-11}$ | 0.731 |
| HHV7         | 0                  | 6   | 32602665 | rs139299944 | C       | CT    | 0.655 | 0.114  | (0.017) | $1.5 \times 10^{-11}$ | 0.998 |
| HSV1         | 0                  | 6   | 32627852 | rs1130420   | G       | A     | 0.583 | -0.122 | (0.019) | $2.5 \times 10^{-10}$ | 0.976 |
| VZV          | 0                  | 6   | 32589842 | rs9271525   | G       | A     | 0.831 | -0.318 | (0.031) | $3.9 \times 10^{-24}$ | 0.977 |
| JCV          | 0                  | 6   | 32623193 | rs9273325   | G       | A     | 0.163 | -0.232 | (0.021) | $8.2 \times 10^{-28}$ | 0.998 |

<sup>1</sup> Conditional analysis round. Round 0 corresponds to results from unconditional analyses (not adjusted for any SNPs/indels).

**Table S9:** Associations from conditional analyses of classical HLA alleles associated with EBV ZEBRA antigen response at the Bonferroni-corrected threshold of  $P < 4.6 \times 10^{-5}$ . Independent alleles identified at each round are in bold.

| Allele            | Unconditional (Round 0) |                |                                         | Conditional Round 1 |                |                                         | Conditional Round 2 |                |                                         | Conditional Round 3 |                |                                         | Conditional Round 4 |                |                                        | Conditional Round 5 |         |                      |
|-------------------|-------------------------|----------------|-----------------------------------------|---------------------|----------------|-----------------------------------------|---------------------|----------------|-----------------------------------------|---------------------|----------------|-----------------------------------------|---------------------|----------------|----------------------------------------|---------------------|---------|----------------------|
|                   | Beta                    | (SE)           | P                                       | Beta                | (SE)           | $P_{cond}$                              | Beta                | (S)E           | $P_{cond}$                              | Beta                | (SE)           | $P_{cond}$                              | Beta                | (SE)           | $P_{cond}$                             | Beta                | (SE)    | $P_{cond}$           |
| <b>DRB4*00:00</b> | <b>-0.246</b>           | <b>(0.017)</b> | <b><math>1.4 \times 10^{-46}</math></b> | -                   | -              | -                                       | -                   | -              | -                                       | -                   | -              | -                                       | -                   | -              | -                                      | -                   | -       | -                    |
| <b>DQB1*04:02</b> | 0.415                   | (0.056)        | $1.3 \times 10^{-13}$                   | <b>0.504</b>        | <b>(0.055)</b> | <b><math>1.0 \times 10^{-19}</math></b> | -                   | -              | -                                       | -                   | -              | -                                       | -                   | -              | -                                      | -                   | -       | -                    |
| <b>DRB1*04:04</b> | 0.508                   | (0.042)        | $6.8 \times 10^{-34}$                   | 0.378               | (0.043)        | $1.1 \times 10^{-18}$                   | <b>0.376</b>        | <b>(0.042)</b> | <b><math>1.1 \times 10^{-18}</math></b> | -                   | -              | -                                       | -                   | -              | -                                      | -                   | -       | -                    |
| <b>DQA1*02:01</b> | 0.254                   | (0.023)        | $4.9 \times 10^{-27}$                   | 0.096               | (0.028)        | $6.3 \times 10^{-4}$                    | 0.098               | (0.028)        | $4.4 \times 10^{-4}$                    | <b>0.187</b>        | <b>(0.029)</b> | <b><math>1.1 \times 10^{-10}</math></b> | -                   | -              | -                                      | -                   | -       | -                    |
| <b>A*03:01</b>    | 0.107                   | (0.024)        | $6.2 \times 10^{-6}$                    | 0.125               | (0.023)        | $8.4 \times 10^{-8}$                    | 0.128               | (0.023)        | $3.2 \times 10^{-8}$                    | 0.125               | (0.023)        | $5.8 \times 10^{-8}$                    | <b>0.129</b>        | <b>(0.023)</b> | <b><math>1.9 \times 10^{-8}</math></b> | -                   | -       | -                    |
| DRB3*00:00        | 0.202                   | (0.017)        | $7.4 \times 10^{-32}$                   | 0.100               | (0.020)        | $6.7 \times 10^{-7}$                    | 0.067               | (0.020)        | $9.5 \times 10^{-4}$                    | 0.063               | (0.020)        | $2.0 \times 10^{-3}$                    | 0.060               | (0.020)        | $2.7 \times 10^{-3}$                   | 0.043               | (0.020) | 0.036                |
| DRB1*07:01        | 0.251                   | (0.023)        | $1.3 \times 10^{-26}$                   | 0.093               | (0.028)        | $9.2 \times 10^{-4}$                    | 0.094               | (0.028)        | $7.1 \times 10^{-4}$                    | 0.184               | (0.029)        | $2.4 \times 10^{-10}$                   | -0.038              | (0.185)        | 0.84                                   | -0.050              | (0.184) | 0.79                 |
| DQB1*02:02        | 0.300                   | (0.030)        | $4.5 \times 10^{-23}$                   | 0.128               | (0.034)        | $1.5 \times 10^{-4}$                    | 0.135               | (0.034)        | $6.1 \times 10^{-5}$                    | 0.217               | (0.034)        | $2.8 \times 10^{-10}$                   | 0.115               | (0.053)        | 0.029                                  | 0.120               | (0.053) | 0.022                |
| DRB4*01:01        | 0.293                   | (0.030)        | $7.9 \times 10^{-22}$                   | 0.137               | (0.033)        | $3.2 \times 10^{-5}$                    | 0.139               | (0.033)        | $2.3 \times 10^{-5}$                    | 0.200               | (0.033)        | $1.9 \times 10^{-9}$                    | 0.114               | (0.040)        | $4.7 \times 10^{-3}$                   | 0.112               | (0.040) | $5.7 \times 10^{-3}$ |
| DQB1*03:02        | 0.251                   | (0.027)        | $5.2 \times 10^{-21}$                   | 0.103               | (0.029)        | $4.4 \times 10^{-4}$                    | 0.107               | (0.029)        | $2.6 \times 10^{-4}$                    | -0.057              | (0.035)        | 0.10                                    | 0.060               | (0.040)        | 0.13                                   | 0.057               | (0.040) | 0.15                 |
| DRB4*01:03        | 0.173                   | (0.019)        | $7.0 \times 10^{-20}$                   | -0.142              | (0.032)        | $1.1 \times 10^{-5}$                    | -0.144              | (0.032)        | $8.1 \times 10^{-6}$                    | -0.194              | (0.032)        | $2.2 \times 10^{-9}$                    | -0.112              | (0.039)        | $3.9 \times 10^{-3}$                   | -0.110              | (0.039) | $4.7 \times 10^{-3}$ |
| DQA1*05:01        | -0.169                  | (0.019)        | $5.7 \times 10^{-18}$                   | -0.067              | (0.021)        | $1.4 \times 10^{-3}$                    | -0.043              | (0.021)        | 0.043                                   | -0.039              | (0.021)        | 0.066                                   | -0.038              | (0.021)        | 0.074                                  | -0.019              | (0.021) | 0.36                 |
| DQA1*03:01        | 0.168                   | (0.020)        | $1.3 \times 10^{-16}$                   | -0.044              | (0.027)        | 0.10                                    | -0.047              | (0.027)        | 0.080                                   | -0.145              | (0.028)        | $2.8 \times 10^{-7}$                    | 0.153               | (0.073)        | 0.036                                  | 0.148               | (0.073) | 0.043                |
| DRB1*03:01        | -0.172                  | (0.023)        | $5.1 \times 10^{-14}$                   | -0.077              | (0.024)        | $1.2 \times 10^{-3}$                    | -0.058              | (0.024)        | 0.015                                   | -0.055              | (0.024)        | 0.020                                   | -0.055              | (0.024)        | 0.019                                  | -0.037              | (0.024) | 0.12                 |
| DQB1*02:01        | -0.170                  | (0.023)        | $9.8 \times 10^{-14}$                   | -0.078              | (0.024)        | $9.3 \times 10^{-4}$                    | -0.059              | (0.024)        | 0.012                                   | -0.057              | (0.023)        | 0.016                                   | -0.057              | (0.023)        | 0.014                                  | -0.039              | (0.024) | 0.097                |
| DRB3*01:01        | -0.154                  | (0.022)        | $1.3 \times 10^{-12}$                   | -0.054              | (0.023)        | 0.018                                   | -0.033              | (0.023)        | 0.15                                    | -0.031              | (0.023)        | 0.17                                    | -0.031              | (0.023)        | 0.17                                   | -0.014              | (0.023) | 0.52                 |
| DQA1*04:01        | 0.402                   | (0.057)        | $1.9 \times 10^{-12}$                   | 0.506               | (0.057)        | $4.2 \times 10^{-19}$                   | 0.114               | (0.232)        | 0.62                                    | 0.107               | (0.231)        | 0.64                                    | 0.064               | (0.230)        | 0.78                                   | 0.073               | (0.230) | 0.75                 |
| DRB1*08:01        | 0.409                   | (0.059)        | $3.9 \times 10^{-12}$                   | 0.519               | (0.058)        | $7.2 \times 10^{-19}$                   | 0.118               | (0.204)        | 0.56                                    | 0.125               | (0.203)        | 0.54                                    | 0.093               | (0.203)        | 0.65                                   | 0.088               | (0.202) | 0.66                 |
| B*08:01           | -0.157                  | (0.023)        | $2.1 \times 10^{-11}$                   | -0.080              | (0.024)        | $7.3 \times 10^{-4}$                    | -0.062              | (0.024)        | $9.2 \times 10^{-3}$                    | -0.062              | (0.024)        | $9.0 \times 10^{-3}$                    | -0.062              | (0.024)        | $8.8 \times 10^{-3}$                   | -0.040              | (0.024) | 0.093                |
| C*07:01           | -0.135                  | (0.021)        | $2.6 \times 10^{-10}$                   | -0.072              | (0.022)        | $8.0 \times 10^{-4}$                    | -0.057              | (0.022)        | $7.9 \times 10^{-3}$                    | -0.055              | (0.021)        | $9.9 \times 10^{-3}$                    | -0.053              | (0.021)        | 0.013                                  | -0.034              | (0.022) | 0.12                 |
| B*44:03           | 0.215                   | (0.034)        | $4.4 \times 10^{-10}$                   | 0.101               | (0.035)        | $3.8 \times 10^{-3}$                    | 0.102               | (0.035)        | $3.5 \times 10^{-3}$                    | 0.140               | (0.035)        | $6.1 \times 10^{-5}$                    | 0.076               | (0.037)        | 0.039                                  | 0.089               | (0.037) | 0.016                |
| DPB1*06:01        | 0.550                   | (0.091)        | $1.7 \times 10^{-9}$                    | 0.386               | (0.091)        | $2.1 \times 10^{-5}$                    | 0.379               | (0.090)        | $2.7 \times 10^{-5}$                    | 0.019               | (0.101)        | 0.85                                    | 0.027               | (0.101)        | 0.79                                   | 0.028               | (0.101) | 0.78                 |
| DRB3*02:02        | -0.142                  | (0.024)        | $4.3 \times 10^{-9}$                    | -0.055              | (0.025)        | 0.026                                   | -0.034              | (0.025)        | 0.17                                    | -0.031              | (0.025)        | 0.21                                    | -0.029              | (0.025)        | 0.24                                   | -0.020              | (0.025) | 0.41                 |
| DQA1*01:02        | -0.116                  | (0.021)        | $2.2 \times 10^{-8}$                    | -0.015              | (0.022)        | 0.48                                    | 0.008               | (0.022)        | 0.72                                    | 0.011               | (0.022)        | 0.60                                    | 0.014               | (0.022)        | 0.52                                   | -0.002              | (0.022) | 0.92                 |
| C*16:01           | 0.219                   | (0.040)        | $3.0 \times 10^{-8}$                    | 0.111               | (0.040)        | $5.4 \times 10^{-3}$                    | 0.109               | (0.040)        | $6.1 \times 10^{-3}$                    | 0.142               | (0.040)        | $3.5 \times 10^{-4}$                    | 0.082               | (0.041)        | 0.045                                  | 0.092               | (0.041) | 0.024                |
| A*29:02           | 0.209                   | (0.042)        | $6.6 \times 10^{-7}$                    | 0.130               | (0.042)        | $1.9 \times 10^{-3}$                    | 0.127               | (0.042)        | $2.4 \times 10^{-3}$                    | 0.151               | (0.042)        | $2.9 \times 10^{-4}$                    | 0.109               | (0.042)        | $9.5 \times 10^{-3}$                   | 0.126               | (0.042) | $2.8 \times 10^{-3}$ |

|            |        |         |                      |        |         |                      |        |         |       |        |         |       |        |         |      |        |         |       |
|------------|--------|---------|----------------------|--------|---------|----------------------|--------|---------|-------|--------|---------|-------|--------|---------|------|--------|---------|-------|
| DRB3*03:01 | -0.181 | (0.042) | $1.5 \times 10^{-5}$ | -0.092 | (0.042) | 0.028                | -0.073 | (0.042) | 0.079 | -0.069 | (0.041) | 0.097 | -0.066 | (0.041) | 0.11 | -0.069 | (0.041) | 0.096 |
| DRB1*13:02 | -0.178 | (0.042) | $2.0 \times 10^{-5}$ | -0.090 | (0.042) | 0.032                | -0.070 | (0.042) | 0.091 | -0.066 | (0.041) | 0.11  | -0.063 | (0.041) | 0.13 | -0.065 | (0.041) | 0.11  |
| B*40:01    | 0.150  | (0.036) | $3.7 \times 10^{-5}$ | 0.109  | (0.036) | $2.5 \times 10^{-3}$ | 0.092  | (0.036) | 0.010 | 0.011  | (0.037) | 0.77  | 0.024  | (0.037) | 0.52 | 0.031  | (0.037) | 0.39  |

**Table S10:** Associations from conditional analyses of classical HLA alleles associated with EBV EBNA antigen response at the Bonferroni-corrected threshold of  $P < 4.6 \times 10^{-5}$ . Independent alleles identified at each round are in bold.

| Allele            | Unconditional (Round 0) |                |                                         | Conditional Round 1 |                |                                         | Conditional Round 2 |                |                                         | Conditional Round 3 |                |                                         | Conditional Round 4 |                |                                         | Conditional Round 5 |         |                      |
|-------------------|-------------------------|----------------|-----------------------------------------|---------------------|----------------|-----------------------------------------|---------------------|----------------|-----------------------------------------|---------------------|----------------|-----------------------------------------|---------------------|----------------|-----------------------------------------|---------------------|---------|----------------------|
|                   | Beta                    | SE             | P                                       | Beta                | SE             | $P_{\text{cond}}$                       | Beta                | SE             | $P_{\text{cond}}$                       | Beta                | SE             | $P_{\text{cond}}$                       | Beta                | SE             | $P_{\text{cond}}$                       | Beta                | SE      | $P_{\text{cond}}$    |
| <b>DRB5*00:00</b> | <b>-0.255</b>           | <b>(0.022)</b> | <b><math>8.7 \times 10^{-30}</math></b> | -                   | -              | -                                       | -                   | -              | -                                       | -                   | -              | -                                       | -                   | -              | -                                       | -                   | -       | -                    |
| <b>DRB3*02:02</b> | 0.224                   | (0.024)        | $2.2 \times 10^{-20}$                   | <b>0.276</b>        | <b>(0.024)</b> | <b><math>6.8 \times 10^{-30}</math></b> | -                   | -              | -                                       | -                   | -              | -                                       | -                   | -              | -                                       | -                   | -       | -                    |
| <b>DQB1*02:01</b> | -0.217                  | (0.023)        | $2.4 \times 10^{-20}$                   | -0.174              | (0.024)        | $2.0 \times 10^{-13}$                   | <b>-0.164</b>       | <b>(0.023)</b> | <b><math>3.6 \times 10^{-12}</math></b> | -                   | -              | -                                       | -                   | -              | -                                       | -                   | -       | -                    |
| <b>DRB4*00:00</b> | 0.198                   | (0.018)        | $6.6 \times 10^{-29}$                   | 0.150               | (0.018)        | $3.8 \times 10^{-16}$                   | 0.092               | (0.019)        | $2.1 \times 10^{-6}$                    | <b>0.176</b>        | <b>(0.021)</b> | <b><math>8.3 \times 10^{-17}</math></b> | -                   | -              | -                                       | -                   | -       | -                    |
| <b>DPB1*03:01</b> | -0.215                  | (0.030)        | $5.7 \times 10^{-13}$                   | -0.199              | (0.030)        | $1.8 \times 10^{-11}$                   | -0.201              | (0.029)        | $6.9 \times 10^{-12}$                   | -0.206              | (0.029)        | $1.7 \times 10^{-12}$                   | <b>-0.220</b>       | <b>(0.029)</b> | <b><math>4.7 \times 10^{-14}</math></b> | -                   | -       | -                    |
| DRB1*15:01        | 0.253                   | (0.023)        | $7.8 \times 10^{-28}$                   | 0.025               | (0.079)        | 0.75                                    | 0.052               | (0.079)        | 0.51                                    | 0.048               | (0.078)        | 0.54                                    | 0.027               | (0.078)        | 0.73                                    | 0.025               | (0.078) | 0.75                 |
| DQA1*01:02        | 0.221                   | (0.020)        | $4.1 \times 10^{-27}$                   | 0.085               | (0.039)        | 0.027                                   | 0.138               | (0.038)        | $3.3 \times 10^{-4}$                    | 0.110               | (0.039)        | $4.5 \times 10^{-3}$                    | 0.018               | (0.040)        | 0.65                                    | 0.046               | (0.040) | 0.26                 |
| DRB5*01:01        | 0.248                   | (0.023)        | $5.2 \times 10^{-27}$                   | -0.049              | (0.085)        | 0.57                                    | -0.016              | (0.085)        | 0.85                                    | -0.016              | (0.084)        | 0.85                                    | -0.036              | (0.084)        | 0.66                                    | -0.036              | (0.084) | 0.67                 |
| DQB1*06:02        | 0.244                   | (0.023)        | $8.5 \times 10^{-26}$                   | -0.024              | (0.067)        | 0.72                                    | 0.006               | (0.066)        | 0.92                                    | 0.001               | (0.066)        | 0.99                                    | -0.028              | (0.066)        | 0.67                                    | -0.037              | (0.065) | 0.57                 |
| DQA1*02:01        | -0.231                  | (0.024)        | $3.1 \times 10^{-21}$                   | -0.188              | (0.025)        | $1.9 \times 10^{-14}$                   | -0.142              | (0.025)        | $9.1 \times 10^{-9}$                    | -0.190              | (0.025)        | $6.3 \times 10^{-14}$                   | -0.113              | (0.029)        | $9.2 \times 10^{-5}$                    | -0.117              | (0.029) | $4.9 \times 10^{-5}$ |
| DRB1*07:01        | -0.230                  | (0.024)        | $3.8 \times 10^{-21}$                   | -0.188              | (0.024)        | $1.9 \times 10^{-14}$                   | -0.142              | (0.025)        | $9.8 \times 10^{-9}$                    | -0.189              | (0.025)        | $6.4 \times 10^{-14}$                   | -0.113              | (0.029)        | $9.1 \times 10^{-5}$                    | -0.117              | (0.029) | $4.7 \times 10^{-5}$ |
| DRB1*03:01        | -0.211                  | (0.023)        | $3.4 \times 10^{-19}$                   | -0.168              | (0.024)        | $1.4 \times 10^{-12}$                   | -0.157              | (0.024)        | $2.8 \times 10^{-11}$                   | 0.119               | (0.127)        | 0.35                                    | 0.003               | (0.127)        | 0.98                                    | -0.005              | (0.126) | 0.97                 |
| DRB4*01:03        | -0.171                  | (0.020)        | $5.0 \times 10^{-18}$                   | -0.123              | (0.020)        | $1.4 \times 10^{-9}$                    | -0.067              | (0.021)        | $1.3 \times 10^{-3}$                    | -0.125              | (0.022)        | $1.0 \times 10^{-8}$                    | 0.029               | (0.033)        | 0.38                                    | 0.035               | (0.033) | 0.29                 |
| DRB1*12:01        | 0.578                   | (0.071)        | $3.5 \times 10^{-16}$                   | 0.617               | (0.070)        | $1.6 \times 10^{-18}$                   | 0.422               | (0.073)        | $7.1 \times 10^{-9}$                    | 0.393               | (0.073)        | $6.9 \times 10^{-8}$                    | 0.365               | (0.072)        | $4.8 \times 10^{-7}$                    | 0.360               | (0.072) | $6.4 \times 10^{-7}$ |
| DQB1*02:02        | -0.242                  | (0.031)        | $1.5 \times 10^{-14}$                   | -0.194              | (0.032)        | $7.5 \times 10^{-10}$                   | -0.144              | (0.032)        | $5.1 \times 10^{-6}$                    | -0.196              | (0.032)        | $1.1 \times 10^{-9}$                    | -0.105              | (0.035)        | $2.6 \times 10^{-3}$                    | -0.106              | (0.035) | $2.4 \times 10^{-3}$ |
| B*07:02           | 0.162                   | (0.023)        | $5.4 \times 10^{-12}$                   | 0.038               | (0.027)        | 0.16                                    | 0.038               | (0.027)        | 0.16                                    | 0.027               | (0.027)        | 0.31                                    | 0.020               | (0.027)        | 0.46                                    | 0.023               | (0.026) | 0.38                 |
| C*07:02           | 0.144                   | (0.023)        | $2.1 \times 10^{-10}$                   | 0.030               | (0.026)        | 0.24                                    | 0.031               | (0.025)        | 0.23                                    | 0.020               | (0.025)        | 0.43                                    | 0.007               | (0.025)        | 0.77                                    | 0.012               | (0.025) | 0.62                 |
| DPB1*04:02        | 0.165                   | (0.027)        | $1.3 \times 10^{-9}$                    | 0.187               | (0.027)        | $4.2 \times 10^{-12}$                   | 0.167               | (0.027)        | $4.4 \times 10^{-10}$                   | 0.159               | (0.027)        | $2.7 \times 10^{-9}$                    | 0.140               | (0.027)        | $1.7 \times 10^{-7}$                    | 0.116               | (0.027) | $1.6 \times 10^{-5}$ |
| DRB1*11:01        | 0.264                   | (0.046)        | $8.1 \times 10^{-9}$                    | 0.312               | (0.045)        | $6.9 \times 10^{-12}$                   | 0.082               | (0.052)        | 0.11                                    | 0.051               | (0.052)        | 0.32                                    | 0.034               | (0.051)        | 0.51                                    | 0.024               | (0.051) | 0.64                 |
| B*08:01           | -0.136                  | (0.024)        | $1.5 \times 10^{-8}$                    | -0.105              | (0.024)        | $1.1 \times 10^{-5}$                    | -0.066              | (0.024)        | $6.3 \times 10^{-3}$                    | 0.112               | (0.034)        | $1.1 \times 10^{-3}$                    | 0.082               | (0.034)        | 0.017                                   | 0.076               | (0.034) | 0.027                |
| DQA1*03:01        | -0.117                  | (0.021)        | $4.5 \times 10^{-8}$                    | -0.067              | (0.022)        | $1.9 \times 10^{-3}$                    | -0.010              | (0.022)        | 0.65                                    | -0.054              | (0.023)        | 0.018                                   | 0.084               | (0.028)        | $2.6 \times 10^{-3}$                    | 0.085               | (0.028) | $2.3 \times 10^{-3}$ |
| A*03:01           | 0.130                   | (0.024)        | $4.6 \times 10^{-8}$                    | 0.092               | (0.024)        | $1.1 \times 10^{-4}$                    | 0.100               | (0.024)        | $2.5 \times 10^{-5}$                    | 0.085               | (0.024)        | $3.1 \times 10^{-4}$                    | 0.073               | (0.024)        | $2.1 \times 10^{-3}$                    | 0.075               | (0.023) | $1.4 \times 10^{-3}$ |
| DRB4*01:01        | -0.168                  | (0.032)        | $9.4 \times 10^{-8}$                    | -0.126              | (0.032)        | $6.9 \times 10^{-5}$                    | -0.078              | (0.032)        | 0.014                                   | -0.117              | (0.032)        | $2.4 \times 10^{-4}$                    | -0.025              | (0.034)        | 0.46                                    | -0.032              | (0.034) | 0.35                 |
| DRB1*14:01        | 0.291                   | (0.060)        | $1.2 \times 10^{-6}$                    | 0.315               | (0.059)        | $1.2 \times 10^{-7}$                    | 0.120               | (0.062)        | 0.053                                   | 0.097               | (0.062)        | 0.118                                   | 0.075               | (0.062)        | 0.22                                    | 0.090               | (0.061) | 0.14                 |
| DRB3*01:01        | -0.107                  | (0.022)        | $1.3 \times 10^{-6}$                    | -0.060              | (0.022)        | $7.1 \times 10^{-3}$                    | -0.003              | (0.023)        | 0.90                                    | 0.279               | (0.035)        | $1.5 \times 10^{-15}$                   | 0.197               | (0.038)        | $1.6 \times 10^{-7}$                    | 0.187               | (0.037) | $5.8 \times 10^{-7}$ |
| DQB1*06:03        | 0.167                   | (0.036)        | $4.3 \times 10^{-6}$                    | 0.207               | (0.036)        | $9.0 \times 10^{-9}$                    | 0.140               | (0.036)        | $1.1 \times 10^{-4}$                    | 0.112               | (0.036)        | $2.1 \times 10^{-3}$                    | 0.047               | (0.037)        | 0.21                                    | 0.048               | (0.037) | 0.19                 |

|            |        |         |                      |        |         |                      |        |         |                      |        |         |                      |       |         |                      |       |         |                      |
|------------|--------|---------|----------------------|--------|---------|----------------------|--------|---------|----------------------|--------|---------|----------------------|-------|---------|----------------------|-------|---------|----------------------|
| DRB1*04:01 | -0.122 | (0.027) | $9.3 \times 10^{-6}$ | -0.074 | (0.028) | $7.4 \times 10^{-3}$ | -0.022 | (0.028) | 0.44                 | -0.061 | (0.028) | 0.031                | 0.045 | (0.031) | 0.15                 | 0.035 | (0.031) | 0.26                 |
| DQB1*05:03 | 0.243  | (0.055) | $1.1 \times 10^{-5}$ | 0.266  | (0.055) | $1.3 \times 10^{-6}$ | 0.078  | (0.057) | 0.17                 | 0.053  | (0.057) | 0.35                 | 0.034 | (0.057) | 0.55                 | 0.047 | (0.057) | 0.41                 |
| C*07:01    | -0.094 | (0.022) | $1.7 \times 10^{-5}$ | -0.065 | (0.022) | $3.0 \times 10^{-3}$ | -0.039 | (0.022) | 0.07                 | 0.086  | (0.027) | $1.7 \times 10^{-3}$ | 0.066 | (0.027) | 0.015                | 0.064 | (0.027) | 0.020                |
| DPB1*05:01 | 0.243  | (0.058) | $2.9 \times 10^{-5}$ | 0.226  | (0.057) | $8.6 \times 10^{-5}$ | 0.219  | (0.057) | $1.2 \times 10^{-4}$ | 0.201  | (0.057) | $4.2 \times 10^{-4}$ | 0.169 | (0.057) | $2.8 \times 10^{-3}$ | 0.148 | (0.057) | $8.8 \times 10^{-3}$ |
| DRB1*13:01 | 0.150  | (0.037) | $4.3 \times 10^{-5}$ | 0.198  | (0.036) | $5.6 \times 10^{-8}$ | 0.133  | (0.037) | $3.0 \times 10^{-4}$ | 0.104  | (0.037) | $4.7 \times 10^{-3}$ | 0.037 | (0.038) | 0.33                 | 0.038 | (0.038) | 0.31                 |
| B*51:01    | 0.183  | (0.045) | $4.6 \times 10^{-5}$ | 0.194  | (0.044) | $1.2 \times 10^{-5}$ | 0.164  | (0.044) | $2.0 \times 10^{-4}$ | 0.144  | (0.044) | $1.1 \times 10^{-3}$ | 0.135 | (0.044) | $2.1 \times 10^{-3}$ | 0.144 | (0.044) | $1.0 \times 10^{-3}$ |



**Table S11:** Associations from conditional analyses of classical HLA alleles associated with EBV p18 antigen response at the Bonferroni-corrected threshold of  $P < 4.6 \times 10^{-5}$ . Independent alleles identified at each round are in bold.

| Allele            | Unconditional (Round 0) |                |                                         | Conditional Round 1 |                |                                         | Conditional Round 2 |         |                      |
|-------------------|-------------------------|----------------|-----------------------------------------|---------------------|----------------|-----------------------------------------|---------------------|---------|----------------------|
|                   | Beta                    | (SE)           | P                                       | Beta                | (SE)           | $P_{\text{cond}}$                       | Beta                | (SE)    | $P_{\text{cond}}$    |
| <b>DRB5*00:00</b> | <b>-0.210</b>           | <b>(0.021)</b> | <b><math>1.7 \times 10^{-22}</math></b> | -                   | -              | -                                       | -                   | -       | -                    |
| <b>DRB1*04:04</b> | 0.319                   | (0.041)        | $4.7 \times 10^{-15}$                   | <b>0.357</b>        | <b>(0.040)</b> | <b><math>1.3 \times 10^{-18}</math></b> | -                   | -       | -                    |
| DRB5*01:01        | 0.211                   | (0.022)        | $1.4 \times 10^{-21}$                   | 0.041               | (0.083)        | 0.62                                    | 0.042               | (0.082) | 0.61                 |
| DRB1*15:01        | 0.209                   | (0.022)        | $4.2 \times 10^{-21}$                   | 0.022               | (0.077)        | 0.78                                    | 0.026               | (0.077) | 0.73                 |
| DQA1*01:02        | 0.181                   | (0.020)        | $2.7 \times 10^{-20}$                   | 0.067               | (0.037)        | 0.069                                   | 0.085               | (0.037) | 0.020                |
| C*07:02           | 0.196                   | (0.022)        | $9.7 \times 10^{-20}$                   | 0.125               | (0.024)        | $2.9 \times 10^{-7}$                    | 0.117               | (0.024) | $1.4 \times 10^{-6}$ |
| DQB1*06:02        | 0.199                   | (0.022)        | $4.7 \times 10^{-19}$                   | -0.043              | (0.064)        | 0.50                                    | -0.039              | (0.064) | 0.54                 |
| B*07:02           | 0.195                   | (0.022)        | $2.2 \times 10^{-18}$                   | 0.115               | (0.026)        | $8.1 \times 10^{-6}$                    | 0.106               | (0.026) | $3.3 \times 10^{-5}$ |
| B*08:01           | -0.119                  | (0.022)        | $8.3 \times 10^{-8}$                    | -0.094              | (0.022)        | $2.4 \times 10^{-5}$                    | -0.079              | (0.022) | $3.6 \times 10^{-4}$ |
| DPB1*03:01        | -0.143                  | (0.028)        | $2.1 \times 10^{-7}$                    | -0.129              | (0.027)        | $2.9 \times 10^{-6}$                    | -0.126              | (0.027) | $4.0 \times 10^{-6}$ |
| DQB1*02:01        | -0.105                  | (0.022)        | $1.3 \times 10^{-6}$                    | -0.069              | (0.022)        | $1.7 \times 10^{-3}$                    | -0.047              | (0.022) | 0.031                |
| DRB1*03:01        | -0.102                  | (0.022)        | $2.2 \times 10^{-6}$                    | -0.067              | (0.022)        | $2.2 \times 10^{-3}$                    | -0.045              | (0.022) | 0.040                |
| DPB1*04:01        | 0.076                   | (0.016)        | $2.5 \times 10^{-6}$                    | 0.046               | (0.016)        | $5.0 \times 10^{-3}$                    | 0.052               | (0.016) | $1.5 \times 10^{-3}$ |
| C*07:01           | -0.093                  | (0.020)        | $4.0 \times 10^{-6}$                    | -0.070              | (0.020)        | $5.8 \times 10^{-4}$                    | -0.056              | (0.020) | $5.7 \times 10^{-3}$ |
| DRB3*00:00        | 0.075                   | (0.016)        | $5.5 \times 10^{-6}$                    | 0.031               | (0.017)        | 0.074                                   | 0.001               | (0.017) | 0.95                 |
| DQA1*05:01        | -0.084                  | (0.019)        | $6.0 \times 10^{-6}$                    | -0.045              | (0.019)        | 0.017                                   | -0.020              | (0.019) | 0.29                 |
| B*14:02           | -0.212                  | (0.048)        | $8.8 \times 10^{-6}$                    | -0.199              | (0.047)        | $2.7 \times 10^{-5}$                    | -0.183              | (0.047) | $1.1 \times 10^{-4}$ |
| C*08:02           | -0.181                  | (0.041)        | $9.2 \times 10^{-6}$                    | -0.165              | (0.041)        | $4.8 \times 10^{-5}$                    | -0.149              | (0.040) | $2.2 \times 10^{-4}$ |
| DPB1*06:01        | 0.379                   | (0.089)        | $2.0 \times 10^{-5}$                    | 0.424               | (0.088)        | $1.7 \times 10^{-6}$                    | 0.077               | (0.100) | 0.44                 |
| DQA1*02:01        | -0.096                  | (0.023)        | $2.5 \times 10^{-5}$                    | -0.059              | (0.023)        | 0.010                                   | -0.038              | (0.023) | 0.099                |
| DRB1*07:01        | -0.095                  | (0.023)        | $3.1 \times 10^{-5}$                    | -0.058              | (0.023)        | 0.011                                   | -0.037              | (0.023) | 0.11                 |
| C*04:01           | -0.117                  | (0.028)        | $4.1 \times 10^{-5}$                    | -0.093              | (0.028)        | $1.1 \times 10^{-3}$                    | -0.081              | (0.028) | $4.0 \times 10^{-3}$ |
| C*03:03           | -0.139                  | (0.034)        | $4.2 \times 10^{-5}$                    | -0.130              | (0.034)        | $1.1 \times 10^{-4}$                    | -0.142              | (0.034) | $2.2 \times 10^{-5}$ |

**Table S12:** Associations from conditional analyses of classical HLA alleles associated with antigen response at the Bonferroni-corrected threshold of  $P < 4.6 \times 10^{-5}$ . Independent alleles identified at each round are in bold. Results are presented for antigens with a single conditionally independent classical allele.

| Antigen    | Allele            | Unconditional (Round 0) |                |                                         | Conditional Round 1                    |         |                      |
|------------|-------------------|-------------------------|----------------|-----------------------------------------|----------------------------------------|---------|----------------------|
|            |                   | Beta                    | (SE)           | P                                       | Beta                                   | SE      | $P_{\text{cond}}$    |
| CMV pp52   | <b>DRB1*01:03</b> | <b>-0.538</b>           | <b>(0.075)</b> | <b><math>9.4 \times 10^{-13}</math></b> | -                                      | -       | -                    |
|            | C*07:01           | -0.091                  | (0.025)        | $2.7 \times 10^{-4}$                    | -0.099                                 | (0.025) | $6.4 \times 10^{-5}$ |
|            | DPB1*03:01        | 0.121                   | (0.034)        | $3.7 \times 10^{-4}$                    | 0.112                                  | (0.034) | $8.9 \times 10^{-4}$ |
| EBV EA-D   | <b>DQB1*02:01</b> | <b>-0.154</b>           | <b>(0.024)</b> | <b><math>8.4 \times 10^{-11}</math></b> | -                                      | -       | -                    |
|            | DRB1*03:01        | -0.147                  | (0.024)        | $5.5 \times 10^{-10}$                   | 0.109                                  | (0.124) | 0.38                 |
|            | B*08:01           | -0.144                  | (0.024)        | $2.7 \times 10^{-9}$                    | -0.064                                 | (0.035) | 0.068                |
|            | DRB1*09:01        | 0.407                   | (0.073)        | $3.2 \times 10^{-8}$                    | 0.383                                  | (0.073) | $1.9 \times 10^{-7}$ |
|            | DQA1*03:01        | 0.110                   | (0.021)        | $1.1 \times 10^{-7}$                    | 0.085                                  | (0.021) | $6.6 \times 10^{-5}$ |
|            | DRB4*00:00        | -0.088                  | (0.018)        | $5.8 \times 10^{-7}$                    | -0.058                                 | (0.018) | $1.5 \times 10^{-3}$ |
|            | C*07:01           | -0.109                  | (0.022)        | $7.7 \times 10^{-7}$                    | -0.032                                 | (0.028) | 0.25                 |
|            | DRB3*00:00        | 0.087                   | (0.018)        | $9.0 \times 10^{-7}$                    | 0.033                                  | (0.021) | 0.12                 |
|            | A*03:01           | 0.114                   | (0.024)        | $2.4 \times 10^{-6}$                    | 0.098                                  | (0.024) | $5.6 \times 10^{-5}$ |
|            | DRB4*01:03        | 0.085                   | (0.019)        | $1.1 \times 10^{-5}$                    | 0.057                                  | (0.020) | $4.4 \times 10^{-3}$ |
|            | DQA1*05:01        | -0.088                  | (0.020)        | $1.4 \times 10^{-5}$                    | 0.026                                  | (0.031) | 0.40                 |
|            | DQB1*03:03        | 0.164                   | (0.038)        | $1.4 \times 10^{-5}$                    | 0.142                                  | (0.038) | $1.9 \times 10^{-4}$ |
|            | DRB3*01:01        | -0.096                  | (0.022)        | $2.0 \times 10^{-5}$                    | 0.035                                  | (0.034) | 0.32                 |
|            | DQB1*03:01        | 0.094                   | (0.022)        | $2.1 \times 10^{-5}$                    | 0.069                                  | (0.023) | $2.2 \times 10^{-3}$ |
|            | HHV7              | <b>DQB1*05:01</b>       | <b>-0.139</b>  | <b>(0.025)</b>                          | <b><math>2.8 \times 10^{-8}</math></b> | -       | -                    |
| DQA1*01:01 |                   | -0.125                  | (0.023)        | $8.2 \times 10^{-8}$                    | -0.045                                 | (0.053) | 0.40                 |
| DRB1*01:01 |                   | -0.146                  | (0.028)        | $2.3 \times 10^{-7}$                    | -0.049                                 | (0.052) | 0.35                 |
| DRB4*00:00 |                   | -0.085                  | (0.017)        | $4.5 \times 10^{-7}$                    | -0.066                                 | (0.017) | $1.6 \times 10^{-4}$ |
| DPB1*04:02 |                   | -0.133                  | (0.026)        | $4.8 \times 10^{-7}$                    | -0.115                                 | (0.027) | $1.5 \times 10^{-5}$ |
| DRB1*04:01 |                   | 0.128                   | (0.026)        | $7.3 \times 10^{-7}$                    | 0.110                                  | (0.026) | $2.3 \times 10^{-5}$ |
| DRB4*01:03 |                   | 0.077                   | (0.019)        | $3.0 \times 10^{-5}$                    | 0.058                                  | (0.019) | $2.0 \times 10^{-3}$ |
| HSV1       | <b>DQB1*02:01</b> | <b>0.145</b>            | <b>(0.026)</b> | <b><math>2.1 \times 10^{-8}</math></b>  | -                                      | -       | -                    |
|            | DRB1*03:01        | 0.140                   | (0.026)        | $6.3 \times 10^{-8}$                    | -0.090                                 | (0.147) | 0.54                 |
|            | DQA1*01:02        | -0.110                  | (0.024)        | $3.1 \times 10^{-6}$                    | -0.086                                 | (0.024) | $3.7 \times 10^{-4}$ |
|            | DQB1*06:02        | -0.115                  | (0.027)        | $1.7 \times 10^{-5}$                    | -0.091                                 | (0.027) | $7.9 \times 10^{-4}$ |
|            | DRB5*00:00        | 0.110                   | (0.026)        | $2.3 \times 10^{-5}$                    | 0.086                                  | (0.026) | $1.2 \times 10^{-3}$ |
|            | DRB1*15:01        | -0.110                  | (0.027)        | $3.6 \times 10^{-5}$                    | -0.086                                 | (0.027) | $1.5 \times 10^{-3}$ |
|            | DRB3*01:01        | 0.102                   | (0.025)        | $3.6 \times 10^{-5}$                    | -0.011                                 | (0.038) | 0.78                 |
|            | DRB5*01:01        | -0.109                  | (0.026)        | $3.7 \times 10^{-5}$                    | -0.085                                 | (0.027) | $1.5 \times 10^{-3}$ |
| VZV        | <b>DRB1*03:01</b> | <b>0.236</b>            | <b>(0.022)</b> | <b><math>7.3 \times 10^{-26}</math></b> | -                                      | -       | -                    |
|            | DQB1*02:01        | 0.236                   | (0.022)        | $7.5 \times 10^{-26}$                   | 0.117                                  | (0.126) | 0.35                 |
|            | B*08:01           | 0.238                   | (0.023)        | $4.7 \times 10^{-25}$                   | 0.131                                  | (0.034) | $1.2 \times 10^{-4}$ |

|     |                   |              |                |                                         |        |         |                      |
|-----|-------------------|--------------|----------------|-----------------------------------------|--------|---------|----------------------|
|     | DRB3*01:01        | 0.197        | (0.021)        | $3.7 \times 10^{-20}$                   | 0.053  | (0.034) | 0.12                 |
|     | C*07:01           | 0.194        | (0.021)        | $4.6 \times 10^{-20}$                   | 0.088  | (0.027) | $1.4 \times 10^{-3}$ |
|     | A*01:01           | 0.181        | (0.021)        | $1.9 \times 10^{-18}$                   | 0.104  | (0.023) | $6.9 \times 10^{-6}$ |
|     | DQA1*05:01        | 0.153        | (0.019)        | $2.8 \times 10^{-15}$                   | -0.013 | (0.031) | 0.67                 |
|     | DRB3*00:00        | -0.114       | (0.017)        | $3.2 \times 10^{-11}$                   | -0.013 | (0.021) | 0.54                 |
|     | DRB5*00:00        | 0.136        | (0.023)        | $2.3 \times 10^{-9}$                    | 0.096  | (0.023) | $3.1 \times 10^{-5}$ |
|     | DRB5*01:01        | -0.135       | (0.023)        | $7.1 \times 10^{-9}$                    | -0.095 | (0.023) | $5.1 \times 10^{-5}$ |
|     | DQB1*06:02        | -0.133       | (0.023)        | $1.6 \times 10^{-8}$                    | -0.095 | (0.024) | $5.4 \times 10^{-5}$ |
|     | DRB1*15:01        | -0.132       | (0.023)        | $1.8 \times 10^{-8}$                    | -0.092 | (0.024) | $1.0 \times 10^{-4}$ |
|     | A*02:01           | -0.103       | (0.019)        | $4.1 \times 10^{-8}$                    | -0.079 | (0.019) | $3.0 \times 10^{-5}$ |
|     | DQA1*01:02        | -0.099       | (0.021)        | $1.4 \times 10^{-6}$                    | -0.057 | (0.021) | $6.7 \times 10^{-3}$ |
|     | <b>DRB5*00:00</b> | <b>0.305</b> | <b>(0.032)</b> | <b><math>1.2 \times 10^{-21}</math></b> | -      | -       | -                    |
|     | DRB5*01:01        | -0.309       | (0.033)        | $4.8 \times 10^{-21}$                   | -0.097 | (0.120) | 0.42                 |
|     | DQB1*06:02        | -0.310       | (0.033)        | $7.2 \times 10^{-21}$                   | -0.116 | (0.093) | 0.21                 |
| JCV | DRB1*15:01        | -0.309       | (0.033)        | $9.0 \times 10^{-21}$                   | -0.082 | (0.112) | 0.46                 |
|     | DQA1*01:02        | -0.218       | (0.028)        | $8.5 \times 10^{-15}$                   | 0.006  | (0.049) | 0.89                 |
|     | DQB1*03:01        | 0.133        | (0.027)        | $1.1 \times 10^{-6}$                    | 0.086  | (0.028) | $1.7 \times 10^{-3}$ |
|     | B*07:02           | -0.132       | (0.031)        | $2.8 \times 10^{-5}$                    | 0.012  | (0.035) | 0.73                 |

**Table S13:** Associations from conditional analyses of classical HLA alleles associated with MCV antigen response at the Bonferroni-corrected threshold of  $P < 4.6 \times 10^{-5}$ . Independent alleles identified at each round are in bold.

| Allele            | Unconditional (Round 0) |                |                                         | Conditional Round 1 |                |                                         | Conditional Round 2 |                |                                         | Conditional Round 3 |                |                                         | Conditional Round 4 |         |                      |
|-------------------|-------------------------|----------------|-----------------------------------------|---------------------|----------------|-----------------------------------------|---------------------|----------------|-----------------------------------------|---------------------|----------------|-----------------------------------------|---------------------|---------|----------------------|
|                   | Beta                    | (SE)           | P                                       | Beta                | (SE)           | $P_{\text{cond}}$                       | Beta                | (SE)           | $P_{\text{cond}}$                       | Beta                | (SE)           | $P_{\text{cond}}$                       | Beta                | (SE)    | $P_{\text{cond}}$    |
| <b>DQA1*01:01</b> | <b>0.215</b>            | <b>(0.027)</b> | <b><math>1.1 \times 10^{-15}</math></b> | -                   | -              | -                                       | -                   | -              | -                                       | -                   | -              | -                                       | -                   | -       | -                    |
| <b>DRB1*04:04</b> | -0.390                  | (0.054)        | $8.6 \times 10^{-13}$                   | <b>-0.362</b>       | <b>(0.054)</b> | <b><math>3.0 \times 10^{-11}</math></b> | -                   | -              | -                                       | -                   | -              | -                                       | -                   | -       | -                    |
| <b>A*29:02</b>    | -0.359                  | (0.052)        | $4.5 \times 10^{-12}$                   | -0.342              | (0.052)        | $3.7 \times 10^{-11}$                   | <b>-0.350</b>       | <b>(0.051)</b> | <b><math>1.0 \times 10^{-11}</math></b> | -                   | -              | -                                       | -                   | -       | -                    |
| <b>DRB1*15:01</b> | -0.213                  | (0.029)        | $2.1 \times 10^{-13}$                   | -0.178              | (0.029)        | $1.1 \times 10^{-9}$                    | -0.199              | (0.029)        | $1.0 \times 10^{-11}$                   | <b>-0.203</b>       | <b>(0.029)</b> | <b><math>3.7 \times 10^{-12}</math></b> | -                   | -       | -                    |
| DQB1*05:01        | 0.220                   | (0.029)        | $1.6 \times 10^{-14}$                   | 0.070               | (0.066)        | 0.29                                    | 0.070               | (0.066)        | 0.29                                    | 0.070               | (0.065)        | 0.29                                    | 0.066               | (0.065) | 0.31                 |
| DQB1*06:02        | -0.213                  | (0.029)        | $2.5 \times 10^{-13}$                   | -0.179              | (0.029)        | $1.2 \times 10^{-9}$                    | -0.199              | (0.029)        | $1.2 \times 10^{-11}$                   | -0.204              | (0.029)        | $3.7 \times 10^{-12}$                   | -0.103              | (0.124) | 0.41                 |
| DRB5*01:01        | -0.210                  | (0.029)        | $3.7 \times 10^{-13}$                   | -0.176              | (0.029)        | $1.8 \times 10^{-9}$                    | -0.196              | (0.029)        | $1.9 \times 10^{-11}$                   | -0.200              | (0.029)        | $7.2 \times 10^{-12}$                   | 0.067               | (0.227) | 0.77                 |
| DRB1*01:01        | 0.216                   | (0.032)        | $1.3 \times 10^{-11}$                   | 0.046               | (0.050)        | 0.35                                    | 0.044               | (0.050)        | 0.38                                    | 0.044               | (0.050)        | 0.37                                    | 0.041               | (0.049) | 0.41                 |
| DRB5*00:00        | 0.185                   | (0.028)        | $4.8 \times 10^{-11}$                   | 0.152               | (0.028)        | $7.4 \times 10^{-8}$                    | 0.173               | (0.028)        | $1.1 \times 10^{-9}$                    | 0.177               | (0.028)        | $3.8 \times 10^{-10}$                   | -0.094              | (0.089) | 0.29                 |
| DQA1*01:02        | -0.151                  | (0.025)        | $1.9 \times 10^{-9}$                    | -0.113              | (0.026)        | $9.8 \times 10^{-6}$                    | -0.136              | (0.026)        | $1.1 \times 10^{-7}$                    | -0.143              | (0.026)        | $2.5 \times 10^{-8}$                    | 0.004               | (0.044) | 0.93                 |
| DPB1*06:01        | -0.591                  | (0.122)        | $1.2 \times 10^{-6}$                    | -0.556              | (0.121)        | $4.4 \times 10^{-6}$                    | -0.228              | (0.137)        | 0.095                                   | -0.208              | (0.136)        | 0.13                                    | -0.217              | (0.136) | 0.11                 |
| DRB3*02:02        | 0.129                   | (0.028)        | $3.0 \times 10^{-6}$                    | 0.131               | (0.028)        | $1.9 \times 10^{-6}$                    | 0.118               | (0.027)        | $1.9 \times 10^{-5}$                    | 0.109               | (0.027)        | $6.8 \times 10^{-5}$                    | 0.081               | (0.028) | $3.4 \times 10^{-3}$ |
| DQB1*03:01        | 0.108                   | (0.025)        | $1.9 \times 10^{-5}$                    | 0.153               | (0.026)        | $2.1 \times 10^{-9}$                    | 0.139               | (0.026)        | $6.0 \times 10^{-8}$                    | 0.131               | (0.025)        | $2.7 \times 10^{-7}$                    | 0.096               | (0.026) | $2.3 \times 10^{-4}$ |
| C*07:02           | -0.118                  | (0.028)        | $2.7 \times 10^{-5}$                    | -0.116              | (0.028)        | $3.0 \times 10^{-5}$                    | -0.117              | (0.028)        | $2.5 \times 10^{-5}$                    | -0.128              | (0.028)        | $3.7 \times 10^{-6}$                    | -0.051              | (0.031) | 0.096                |
| B*07:02           | -0.121                  | (0.029)        | $3.4 \times 10^{-5}$                    | -0.116              | (0.029)        | $6.3 \times 10^{-5}$                    | -0.118              | (0.029)        | $4.4 \times 10^{-5}$                    | -0.127              | (0.029)        | $1.0 \times 10^{-5}$                    | -0.039              | (0.033) | 0.23                 |
| C*16:01           | -0.178                  | (0.048)        | $2.1 \times 10^{-4}$                    | -0.154              | (0.048)        | $1.3 \times 10^{-3}$                    | -0.164              | (0.048)        | $5.7 \times 10^{-4}$                    | 0.096               | (0.064)        | 0.13                                    | 0.073               | (0.064) | 0.25                 |
| DQB1*03:02        | -0.114                  | (0.033)        | $4.8 \times 10^{-4}$                    | -0.080              | (0.033)        | 0.015                                   | 0.064               | (0.040)        | 0.11                                    | 0.051               | (0.040)        | 0.20                                    | 0.024               | (0.040) | 0.55                 |

**Table S14:** Associations for HLA amino acid (AA) sequence substitutions that were significantly associated ( $P < 4.6 \times 10^{-5}$ ) with seroreactivity to EBV p18. At each position that contained a significantly associated allele and >2 possible substitutions, we tested all common (frequency  $\geq 0.01$ ) haplotypes at that position using the omnibus test ( $P_{\text{omni}}$ ) in the conditional haplotype module of PLINK 1.07. Variants and haplotypes with the lowest p-value are indicated in bold and shaded.

| Gene | AA position | AA  | A1 | A2 | FRQ   | BETA   | SE    | P        | $P_{\text{omni}}$ | INFO  |
|------|-------------|-----|----|----|-------|--------|-------|----------|-------------------|-------|
| B    | 9           | D   | P  | A  | 0.146 | -0.117 | 0.022 | 1.23E-07 |                   | 0.999 |
| B    | 11          |     | S  | A  | 0.306 | 0.110  | 0.017 | 2.88E-10 |                   | 0.931 |
| B    | 12          |     | V  | M  | 0.321 | 0.097  | 0.017 | 7.39E-09 |                   | 0.997 |
| B    | 24          | A   | P  | A  | 0.251 | -0.087 | 0.019 | 2.90E-06 |                   | 0.964 |
| B    | 45          | MG  | P  | A  | 0.128 | -0.104 | 0.024 | 1.61E-05 |                   | 0.949 |
| B    | 45          | M   | P  | A  | 0.126 | -0.103 | 0.024 | 2.15E-05 |                   | 0.962 |
| B    | 46          |     | A  | E  | 0.126 | -0.103 | 0.024 | 2.15E-05 |                   | 0.962 |
| B    | 67          | Y   | P  | A  | 0.170 | 0.154  | 0.022 | 9.30E-13 |                   | 0.939 |
| B    | 67          | YS  | P  | A  | 0.573 | 0.109  | 0.016 | 1.66E-11 |                   | 0.932 |
| B    | 67          | FC  | P  | A  | 0.371 | -0.099 | 0.017 | 6.77E-09 |                   | 0.875 |
| B    | 67          | FM  | P  | A  | 0.301 | -0.100 | 0.017 | 9.02E-09 | 5.80E-14          | 0.950 |
| B    | 67          | YM  | P  | A  | 0.225 | 0.104  | 0.020 | 2.55E-07 |                   | 0.859 |
| B    | 67          | F   | P  | A  | 0.246 | -0.094 | 0.019 | 9.50E-07 |                   | 0.881 |
| B    | 67          | YC  | P  | A  | 0.295 | 0.078  | 0.018 | 1.01E-05 |                   | 0.933 |
| B    | 69          | A   | P  | A  | 0.279 | 0.091  | 0.018 | 8.00E-07 |                   | 0.883 |
| B    | 69          | T   | P  | A  | 0.718 | -0.091 | 0.019 | 1.09E-06 |                   | 0.871 |
| B    | 70          | Q   | P  | A  | 0.169 | 0.154  | 0.021 | 8.43E-13 |                   | 0.944 |
| B    | 70          | QK  | P  | A  | 0.226 | 0.126  | 0.019 | 7.04E-11 | 9.52E-12          | 0.943 |
| B    | 70          | QS  | P  | A  | 0.225 | 0.104  | 0.020 | 2.38E-07 |                   | 0.863 |
| B    | 70          | N   | P  | A  | 0.718 | -0.091 | 0.019 | 1.09E-06 |                   | 0.871 |
| B    | 71          |     | A  | T  | 0.282 | 0.091  | 0.019 | 1.08E-06 |                   | 0.871 |
| B    | 103         | VM  | P  | A  | 0.834 | 0.134  | 0.030 | 9.74E-06 |                   | 0.407 |
| B    | 103         | V   | P  | A  | 0.833 | 0.133  | 0.030 | 1.13E-05 |                   | 0.408 |
| B    | 116         | S   | P  | A  | 0.175 | -0.175 | 0.027 | 1.05E-10 |                   | 0.539 |
| B    | 116         | Sx  | P  | A  | 0.194 | -0.154 | 0.024 | 1.25E-10 |                   | 0.640 |
| B    | 116         | YFD | P  | A  | 0.732 | 0.152  | 0.024 | 3.68E-10 |                   | 0.471 |
| B    | 116         | LS  | P  | A  | 0.249 | -0.167 | 0.027 | 6.15E-10 | 2.37E-08          | 0.388 |
| B    | 116         | YD  | P  | A  | 0.632 | 0.116  | 0.019 | 1.85E-09 |                   | 0.673 |
| B    | 116         | YDL | P  | A  | 0.706 | 0.108  | 0.018 | 4.02E-09 |                   | 0.863 |
| B    | 116         | YDx | P  | A  | 0.650 | 0.117  | 0.020 | 1.04E-08 |                   | 0.597 |
| B    | 116         | FS  | P  | A  | 0.275 | -0.110 | 0.019 | 1.76E-08 |                   | 0.780 |
| B    | 152         | E   | P  | A  | 0.292 | 0.177  | 0.024 | 1.22E-13 |                   | 0.484 |

|      |     |    |   |   |       |        |       |          |          |       |
|------|-----|----|---|---|-------|--------|-------|----------|----------|-------|
| B    | 152 | V  | P | A | 0.689 | -0.134 | 0.022 | 8.79E-10 |          | 0.559 |
| B    | 156 | R  | P | A | 0.141 | 0.200  | 0.027 | 4.84E-14 |          | 0.710 |
| B    | 156 | Rx | P | A | 0.160 | 0.180  | 0.027 | 1.51E-11 |          | 0.604 |
| B    | 156 | RW | P | A | 0.184 | 0.139  | 0.025 | 3.16E-08 | 3.22E-12 | 0.623 |
| B    | 156 | DL | P | A | 0.797 | -0.100 | 0.023 | 1.32E-05 |          | 0.715 |
| B    | 156 | RL | P | A | 0.670 | 0.086  | 0.020 | 2.10E-05 |          | 0.579 |
| B    | 163 | E  | P | A | 0.287 | 0.130  | 0.019 | 4.83E-12 |          | 0.824 |
| B    | 163 | Ex | P | A | 0.305 | 0.123  | 0.019 | 1.08E-10 | 9.76E-12 | 0.747 |
| B    | 163 | EL | P | A | 0.701 | 0.113  | 0.019 | 1.81E-09 |          | 0.804 |
| B    | 163 | T  | P | A | 0.280 | -0.099 | 0.018 | 8.06E-08 |          | 0.881 |
| B    | 178 | K  | P | A | 0.210 | 0.165  | 0.021 | 5.06E-15 |          | 0.800 |
| B    | 178 | T  | P | A | 0.771 | -0.155 | 0.021 | 3.48E-13 |          | 0.712 |
| C    | -15 | L  | P | A | 0.419 | 0.072  | 0.016 | 8.83E-06 |          | 1.000 |
| C    | -15 | I  | P | A | 0.580 | -0.071 | 0.016 | 9.26E-06 |          | 0.997 |
| C    | 1   | C  | P | A | 0.774 | 0.094  | 0.019 | 5.42E-07 |          | 1.000 |
| C    | 1   | G  | P | A | 0.226 | -0.094 | 0.019 | 5.57E-07 |          | 0.997 |
| C    | 14  |    | W | R | 0.085 | -0.116 | 0.028 | 4.37E-05 |          | 1.000 |
| C    | 49  |    | E | A | 0.085 | -0.116 | 0.028 | 4.37E-05 |          | 0.999 |
| C    | 99  | S  | P | A | 0.157 | 0.192  | 0.021 | 4.70E-19 |          | 0.998 |
| C    | 99  | YF | P | A | 0.808 | -0.171 | 0.020 | 7.91E-18 | 6.01E-19 | 0.998 |
| C    | 99  | Y  | P | A | 0.714 | -0.088 | 0.017 | 3.12E-07 |          | 0.998 |
| C    | 99  | YC | P | A | 0.749 | -0.090 | 0.018 | 5.32E-07 |          | 0.998 |
| C    | 116 | SL | P | A | 0.585 | 0.069  | 0.017 | 3.03E-05 |          | 0.929 |
| C    | 219 | W  | P | A | 0.264 | -0.080 | 0.018 | 8.01E-06 |          | 0.998 |
| C    | 219 | R  | P | A | 0.735 | 0.079  | 0.018 | 8.53E-06 |          | 0.995 |
| C    | 303 | M  | P | A | 0.084 | -0.118 | 0.029 | 3.70E-05 |          | 0.987 |
| DPB1 | 8   |    | V | L | 0.280 | -0.094 | 0.017 | 7.50E-08 |          | 0.998 |
| DPB1 | 9   | F  | P | A | 0.720 | 0.094  | 0.017 | 7.50E-08 |          | 0.998 |
| DPB1 | 9   | Y  | P | A | 0.237 | -0.076 | 0.018 | 3.39E-05 |          | 0.995 |
| DPB1 | 11  |    | L | G | 0.216 | -0.078 | 0.019 | 4.37E-05 |          | 0.994 |
| DPB1 | 55  | D  | P | A | 0.402 | -0.068 | 0.017 | 3.82E-05 |          | 0.921 |
| DPB1 | 56  |    | E | A | 0.402 | -0.068 | 0.017 | 3.82E-05 |          | 0.921 |
| DPB1 | 76  | V  | P | A | 0.201 | -0.131 | 0.021 | 2.61E-10 |          | 0.881 |
| DPB1 | 76  | M  | P | A | 0.779 | 0.119  | 0.020 | 2.52E-09 |          | 0.888 |
| DPB1 | 84  | D  | P | A | 0.307 | -0.084 | 0.017 | 7.58E-07 |          | 0.997 |
| DPB1 | 84  | G  | P | A | 0.686 | 0.077  | 0.017 | 4.74E-06 |          | 0.997 |
| DPB1 | 85  |    | E | G | 0.307 | -0.084 | 0.017 | 7.64E-07 |          | 0.997 |
| DPB1 | 86  |    | P | A | 0.693 | 0.084  | 0.017 | 7.65E-07 |          | 0.997 |
| DPB1 | 87  |    | V | M | 0.307 | -0.084 | 0.017 | 7.62E-07 |          | 0.997 |
| DPB1 | 96  | K  | P | A | 0.302 | -0.071 | 0.017 | 3.34E-05 |          | 0.991 |

|      |     |    |   |   |       |        |       |          |          |       |
|------|-----|----|---|---|-------|--------|-------|----------|----------|-------|
| DPB1 | 96  | R  | P | A | 0.696 | 0.070  | 0.017 | 3.60E-05 |          | 0.996 |
| DPB1 | 170 | I  | P | A | 0.302 | -0.071 | 0.017 | 3.35E-05 |          | 0.991 |
| DPB1 | 170 | T  | P | A | 0.696 | 0.071  | 0.017 | 3.57E-05 |          | 0.996 |
| DPB1 | 194 | R  | P | A | 0.857 | 0.106  | 0.025 | 1.60E-05 |          | 0.782 |
| DQA1 | -16 | M  | P | A | 0.580 | -0.098 | 0.016 | 8.92E-10 |          | 0.998 |
| DQA1 | -16 | L  | P | A | 0.420 | 0.097  | 0.016 | 1.04E-09 |          | 0.999 |
| DQA1 | 11  | C  | P | A | 0.396 | 0.087  | 0.016 | 6.25E-08 |          | 0.999 |
| DQA1 | 11  | Y  | P | A | 0.604 | -0.087 | 0.016 | 6.25E-08 |          | 0.999 |
| DQA1 | 18  |    | F | S | 0.396 | 0.087  | 0.016 | 6.25E-08 |          | 0.999 |
| DQA1 | 41  |    | K | R | 0.171 | 0.148  | 0.023 | 5.90E-11 |          | 0.816 |
| DQA1 | 45  |    | A | V | 0.396 | 0.087  | 0.016 | 6.30E-08 |          | 0.999 |
| DQA1 | 47  | RQ | P | A | 0.600 | 0.100  | 0.016 | 6.26E-10 |          | 0.986 |
| DQA1 | 47  | R  | P | A | 0.395 | 0.087  | 0.016 | 6.48E-08 | 2.05E-09 | 0.997 |
| DQA1 | 47  | K  | P | A | 0.136 | -0.096 | 0.023 | 3.14E-05 |          | 0.979 |
| DQA1 | 48  |    | W | L | 0.396 | 0.087  | 0.016 | 6.20E-08 |          | 0.999 |
| DQA1 | 50  | E  | P | A | 0.396 | 0.087  | 0.016 | 6.37E-08 |          | 0.998 |
| DQA1 | 52  | S  | P | A | 0.396 | 0.087  | 0.016 | 6.31E-08 |          | 0.999 |
| DQA1 | 52  | H  | P | A | 0.136 | -0.096 | 0.023 | 3.14E-05 |          | 0.979 |
| DQA1 | 53  | K  | P | A | 0.396 | 0.087  | 0.016 | 6.20E-08 |          | 0.999 |
| DQA1 | 54  |    | L | F | 0.136 | -0.096 | 0.023 | 3.14E-05 |          | 0.979 |
| DQA1 | 55  |    | G | R | 0.396 | 0.087  | 0.016 | 6.36E-08 |          | 0.998 |
| DQA1 | 56  | x  | P | A | 0.400 | -0.100 | 0.016 | 6.42E-10 |          | 0.985 |
| DQA1 | 56  | G  | P | A | 0.396 | 0.087  | 0.016 | 6.36E-08 |          | 0.998 |
| DQA1 | 61  |    | G | F | 0.396 | 0.087  | 0.016 | 6.20E-08 |          | 0.999 |
| DQA1 | 64  |    | R | T | 0.396 | 0.087  | 0.016 | 6.37E-08 |          | 0.998 |
| DQA1 | 66  |    | M | I | 0.396 | 0.087  | 0.016 | 6.20E-08 |          | 0.999 |
| DQA1 | 69  | L  | P | A | 0.580 | -0.097 | 0.016 | 1.01E-09 |          | 0.998 |
| DQA1 | 69  | A  | P | A | 0.396 | 0.087  | 0.016 | 6.20E-08 |          | 0.999 |
| DQA1 | 75  |    | S | I | 0.240 | -0.084 | 0.018 | 4.44E-06 |          | 0.995 |
| DQA1 | 76  | L  | P | A | 0.400 | -0.100 | 0.016 | 6.37E-10 |          | 0.985 |
| DQA1 | 76  | M  | P | A | 0.396 | 0.087  | 0.016 | 6.31E-08 |          | 0.998 |
| DQA1 | 80  |    | Y | S | 0.396 | 0.087  | 0.016 | 6.20E-08 |          | 0.999 |
| DQA1 | 107 | T  | P | A | 0.758 | 0.085  | 0.018 | 3.78E-06 |          | 0.986 |
| DQA1 | 107 | I  | P | A | 0.240 | -0.084 | 0.018 | 4.48E-06 |          | 0.995 |
| DQA1 | 130 | S  | P | A | 0.829 | -0.148 | 0.023 | 5.21E-11 |          | 0.817 |
| DQA1 | 130 | A  | P | A | 0.172 | 0.148  | 0.023 | 5.87E-11 |          | 0.818 |
| DQA1 | 156 | F  | P | A | 0.760 | 0.084  | 0.018 | 4.49E-06 |          | 0.994 |
| DQA1 | 156 | L  | P | A | 0.240 | -0.084 | 0.018 | 4.49E-06 |          | 0.994 |
| DQA1 | 161 | D  | P | A | 0.760 | 0.084  | 0.018 | 4.48E-06 |          | 0.995 |
| DQA1 | 161 | E  | P | A | 0.240 | -0.084 | 0.018 | 4.50E-06 |          | 0.994 |

|      |     |    |   |   |       |        |       |          |          |       |
|------|-----|----|---|---|-------|--------|-------|----------|----------|-------|
| DQA1 | 163 | I  | P | A | 0.760 | 0.084  | 0.018 | 4.48E-06 |          | 0.994 |
| DQA1 | 163 | S  | P | A | 0.240 | -0.084 | 0.018 | 4.49E-06 |          | 0.995 |
| DQA1 | 175 | Qx | P | A | 0.396 | 0.088  | 0.016 | 5.49E-08 | 1.83E-08 | 0.999 |
| DQA1 | 175 | Q  | P | A | 0.396 | 0.088  | 0.016 | 5.54E-08 |          | 0.999 |
| DQA1 | 175 | K  | P | A | 0.240 | -0.084 | 0.018 | 4.49E-06 |          | 0.995 |
| DQA1 | 175 | QE | P | A | 0.760 | 0.084  | 0.018 | 4.65E-06 |          | 0.995 |
| DQA1 | 207 | M  | P | A | 0.085 | 0.168  | 0.034 | 9.79E-07 |          | 0.593 |
| DQA1 | 207 | V  | P | A | 0.915 | -0.167 | 0.034 | 9.99E-07 |          | 0.593 |
| DQA1 | 218 | R  | P | A | 0.603 | -0.089 | 0.016 | 3.54E-08 |          | 0.999 |
| DQA1 | 218 | Q  | P | A | 0.397 | 0.089  | 0.016 | 3.68E-08 |          | 0.999 |
| DQB1 | -4  | V  | P | A | 0.607 | -0.090 | 0.016 | 2.23E-08 |          | 0.997 |
| DQB1 | -4  | L  | P | A | 0.361 | 0.085  | 0.017 | 3.07E-07 |          | 0.976 |
| DQB1 | -5  | PS | P | A | 0.757 | -0.134 | 0.018 | 9.65E-14 | 1.84E-12 | 0.997 |
| DQB1 | -5  | L  | P | A | 0.211 | 0.139  | 0.019 | 5.97E-13 |          | 0.970 |
| DQB1 | -5  | P  | P | A | 0.607 | -0.090 | 0.016 | 2.24E-08 |          | 0.996 |
| DQB1 | -5  | Px | P | A | 0.639 | -0.085 | 0.017 | 3.07E-07 |          | 0.976 |
| DQB1 | -6  | T  | P | A | 0.605 | -0.092 | 0.016 | 1.36E-08 | 1.66E-07 | 0.988 |
| DQB1 | -6  | TA | P | A | 0.607 | -0.090 | 0.016 | 2.26E-08 |          | 0.996 |
| DQB1 | -6  | Tx | P | A | 0.637 | -0.087 | 0.017 | 1.93E-07 |          | 0.967 |
| DQB1 | -6  | S  | P | A | 0.361 | 0.085  | 0.017 | 3.07E-07 |          | 0.976 |
| DQB1 | -10 | S  | P | A | 0.254 | -0.117 | 0.018 | 7.14E-11 |          | 0.999 |
| DQB1 | -10 | A  | P | A | 0.714 | 0.099  | 0.017 | 1.40E-08 |          | 0.974 |
| DQB1 | -18 | A  | P | A | 0.434 | -0.121 | 0.016 | 3.25E-14 |          | 0.990 |
| DQB1 | -18 | V  | P | A | 0.534 | 0.111  | 0.016 | 2.97E-12 |          | 0.971 |
| DQB1 | -21 | G  | P | A | 0.607 | -0.090 | 0.016 | 2.25E-08 |          | 0.996 |
| DQB1 | -21 | D  | P | A | 0.361 | 0.085  | 0.017 | 3.07E-07 |          | 0.976 |
| DQB1 | 9   | YL | P | A | 0.836 | -0.201 | 0.022 | 3.01E-20 | 4.35E-19 | 0.912 |
| DQB1 | 9   | F  | P | A | 0.164 | 0.201  | 0.022 | 3.02E-20 |          | 0.912 |
| DQB1 | 9   | Y  | P | A | 0.833 | -0.193 | 0.022 | 3.91E-19 |          | 0.913 |
| DQB1 | 9   | Yx | P | A | 0.833 | -0.193 | 0.022 | 3.91E-19 |          | 0.913 |
| DQB1 | 28  |    | S | T | 0.254 | -0.117 | 0.018 | 7.01E-11 |          | 1.000 |
| DQB1 | 30  | S  | P | A | 0.254 | -0.117 | 0.018 | 7.01E-11 |          | 1.000 |
| DQB1 | 30  | Y  | P | A | 0.500 | 0.101  | 0.016 | 2.69E-10 |          | 0.939 |
| DQB1 | 37  | Y  | P | A | 0.743 | 0.119  | 0.018 | 2.85E-11 |          | 0.999 |
| DQB1 | 37  | I  | P | A | 0.254 | -0.117 | 0.018 | 7.01E-11 |          | 1.000 |
| DQB1 | 38  |    | V | A | 0.409 | -0.109 | 0.016 | 7.37E-12 |          | 0.996 |
| DQB1 | 46  |    | E | V | 0.254 | -0.117 | 0.018 | 7.05E-11 |          | 0.999 |
| DQB1 | 47  |    | F | Y | 0.254 | -0.117 | 0.018 | 7.02E-11 |          | 0.999 |
| DQB1 | 52  |    | L | P | 0.254 | -0.117 | 0.018 | 7.02E-11 |          | 0.999 |
| DQB1 | 53  |    | Q | L | 0.395 | 0.088  | 0.016 | 5.31E-08 |          | 0.997 |



|      |     |    |   |   |       |        |       |          |          |       |
|------|-----|----|---|---|-------|--------|-------|----------|----------|-------|
| DQB1 | 55  | L  | P | A | 0.254 | -0.117 | 0.018 | 7.02E-11 |          | 0.999 |
| DQB1 | 55  | R  | P | A | 0.417 | 0.099  | 0.016 | 6.64E-10 |          | 0.997 |
| DQB1 | 57  | AV | P | A | 0.552 | -0.078 | 0.016 | 1.58E-06 |          | 0.952 |
| DQB1 | 57  | A  | P | A | 0.401 | -0.073 | 0.016 | 6.35E-06 | 3.21E-05 | 0.982 |
| DQB1 | 57  | D  | P | A | 0.438 | 0.069  | 0.016 | 2.13E-05 |          | 0.950 |
| DQB1 | 66  |    | D | E | 0.281 | -0.097 | 0.017 | 3.28E-08 |          | 0.998 |
| DQB1 | 67  |    | I | V | 0.281 | -0.096 | 0.017 | 3.30E-08 |          | 0.998 |
| DQB1 | 70  | R  | P | A | 0.618 | -0.099 | 0.016 | 2.15E-09 |          | 0.966 |
| DQB1 | 70  | G  | P | A | 0.358 | 0.086  | 0.017 | 2.45E-07 |          | 0.965 |
| DQB1 | 71  | KA | P | A | 0.404 | -0.108 | 0.016 | 9.86E-12 |          | 0.996 |
| DQB1 | 71  | K  | P | A | 0.254 | -0.117 | 0.018 | 7.02E-11 | 2.00E-12 | 0.999 |
| DQB1 | 71  | T  | P | A | 0.572 | 0.093  | 0.016 | 3.90E-09 |          | 0.995 |
| DQB1 | 71  | KD | P | A | 0.278 | -0.094 | 0.018 | 7.17E-08 |          | 0.998 |
| DQB1 | 74  | A  | P | A | 0.254 | -0.117 | 0.018 | 7.02E-11 |          | 0.999 |
| DQB1 | 74  | E  | P | A | 0.572 | 0.093  | 0.016 | 3.84E-09 |          | 0.995 |
| DQB1 | 75  |    | V | L | 0.428 | -0.093 | 0.016 | 3.88E-09 |          | 0.995 |
| DQB1 | 77  |    | R | T | 0.406 | -0.107 | 0.016 | 1.88E-11 |          | 0.995 |
| DQB1 | 84  | Q  | P | A | 0.605 | -0.088 | 0.016 | 5.41E-08 |          | 0.996 |
| DQB1 | 84  | E  | P | A | 0.393 | 0.087  | 0.016 | 8.65E-08 |          | 0.996 |
| DQB1 | 85  | L  | P | A | 0.605 | -0.088 | 0.016 | 5.38E-08 |          | 0.997 |
| DQB1 | 85  | V  | P | A | 0.393 | 0.087  | 0.016 | 8.66E-08 |          | 0.996 |
| DQB1 | 86  | E  | P | A | 0.605 | -0.088 | 0.016 | 5.44E-08 |          | 0.996 |
| DQB1 | 86  | Ex | P | A | 0.607 | -0.087 | 0.016 | 8.62E-08 | 4.05E-07 | 0.996 |
| DQB1 | 86  | EG | P | A | 0.637 | -0.085 | 0.017 | 3.71E-07 |          | 0.965 |
| DQB1 | 86  | A  | P | A | 0.361 | 0.083  | 0.017 | 5.87E-07 |          | 0.965 |
| DQB1 | 87  | LY | P | A | 0.786 | -0.137 | 0.019 | 8.99E-13 |          | 0.956 |
| DQB1 | 87  | F  | P | A | 0.212 | 0.137  | 0.019 | 1.57E-12 | 5.29E-12 | 0.955 |
| DQB1 | 87  | L  | P | A | 0.605 | -0.088 | 0.016 | 5.34E-08 |          | 0.997 |
| DQB1 | 87  | Lx | P | A | 0.606 | -0.087 | 0.016 | 8.54E-08 |          | 0.997 |
| DQB1 | 89  | T  | P | A | 0.605 | -0.088 | 0.016 | 5.41E-08 |          | 0.997 |
| DQB1 | 89  | G  | P | A | 0.393 | 0.087  | 0.016 | 8.62E-08 |          | 0.996 |
| DQB1 | 90  | T  | P | A | 0.605 | -0.088 | 0.016 | 5.31E-08 |          | 0.997 |
| DQB1 | 90  | I  | P | A | 0.394 | 0.087  | 0.016 | 8.51E-08 |          | 0.997 |
| DQB1 | 125 | AS | P | A | 0.752 | -0.130 | 0.018 | 4.75E-13 |          | 0.989 |
| DQB1 | 125 | G  | P | A | 0.244 | 0.130  | 0.018 | 7.12E-13 | 1.99E-12 | 0.998 |
| DQB1 | 125 | A  | P | A | 0.605 | -0.088 | 0.016 | 5.33E-08 |          | 0.998 |
| DQB1 | 125 | Ax | P | A | 0.606 | -0.087 | 0.016 | 8.54E-08 |          | 0.997 |
| DQB1 | 203 | I  | P | A | 0.606 | -0.091 | 0.016 | 2.31E-08 |          | 0.991 |
| DQB1 | 203 | V  | P | A | 0.391 | 0.089  | 0.016 | 3.54E-08 |          | 0.997 |
| DQB1 | 220 | H  | P | A | 0.603 | -0.088 | 0.016 | 6.00E-08 |          | 0.985 |

|             |            |          |          |          |              |               |              |                 |              |       |
|-------------|------------|----------|----------|----------|--------------|---------------|--------------|-----------------|--------------|-------|
| DQB1        | 220        | R        | P        | A        | 0.394        | 0.087         | 0.016        | 8.02E-08        | 0.996        |       |
| DQB1        | 221        | H        | P        | A        | 0.604        | -0.088        | 0.016        | 6.93E-08        | 0.986        |       |
| DQB1        | 221        | Q        | P        | A        | 0.394        | 0.087         | 0.016        | 7.62E-08        | 0.995        |       |
| DRB1        | -1         | A        | P        | A        | 0.814        | -0.196        | 0.021        | 3.01E-21        | 0.921        |       |
| DRB1        | -1         | S        | P        | A        | 0.149        | 0.198         | 0.022        | 1.27E-19        | 0.994        |       |
| <b>DRB1</b> | <b>-17</b> | <b>A</b> | <b>P</b> | <b>A</b> | <b>0.801</b> | <b>-0.194</b> | <b>0.020</b> | <b>1.03E-21</b> | <b>0.911</b> |       |
| DRB1        | -17        | T        | P        | A        | 0.162        | 0.195         | 0.021        | 6.16E-20        | 0.977        |       |
| DRB1        | -25        | R        | P        | A        | 0.462        | -0.085        | 0.016        | 1.24E-07        | 0.944        |       |
| DRB1        | -25        | K        | P        | A        | 0.501        | 0.071         | 0.016        | 6.80E-06        | 0.986        |       |
| DRB1        | 4          | R        | P        | A        | 0.846        | 0.098         | 0.022        | 8.38E-06        | 0.974        |       |
| DRB1        | 4          | Q        | P        | A        | 0.151        | -0.097        | 0.022        | 9.89E-06        | 1.000        |       |
| DRB1        | 9          | W        | P        | A        | 0.300        | 0.071         | 0.017        | 3.05E-05        | 0.985        |       |
| DRB1        | 10         | Q        | P        | A        | 0.501        | 0.070         | 0.016        | 6.88E-06        | 0.987        |       |
| DRB1        | 10         | Y        | P        | A        | 0.493        | -0.066        | 0.016        | 2.43E-05        | 0.987        |       |
| DRB1        | 11         | P        | P        | A        | 0.156        | 0.201         | 0.021        | 8.06E-21        | 1.000        |       |
| DRB1        | 11         | PL       | P        | A        | 0.162        | 0.195         | 0.021        | 6.16E-20        | 0.977        |       |
| DRB1        | 11         | PD       | P        | A        | 0.168        | 0.181         | 0.021        | 3.17E-18        | 1.000        |       |
| DRB1        | 11         | SVG      | P        | A        | 0.826        | -0.176        | 0.021        | 1.81E-17        | 0.978        |       |
| DRB1        | 11         | PV       | P        | A        | 0.350        | 0.129         | 0.016        | 3.94E-15        | 0.999        |       |
| DRB1        | 11         | SGD      | P        | A        | 0.644        | -0.127        | 0.016        | 1.02E-14        | 0.986        |       |
| DRB1        | 11         | SGL      | P        | A        | 0.638        | -0.122        | 0.016        | 5.98E-14        | 0.999        |       |
| DRB1        | 11         | SG       | P        | A        | 0.632        | -0.120        | 0.016        | 1.45E-13        | 0.986        |       |
| DRB1        | 11         | SLD      | P        | A        | 0.511        | -0.072        | 0.016        | 4.17E-06        | 0.999        |       |
| DRB1        | 11         | SPV      | P        | A        | 0.844        | 0.099         | 0.022        | 5.48E-06        | 7.87E-21     | 0.975 |
| DRB1        | 11         | SD       | P        | A        | 0.506        | -0.071        | 0.016        | 6.66E-06        | 0.987        |       |
| DRB1        | 11         | GD       | P        | A        | 0.151        | -0.097        | 0.022        | 9.89E-06        | 1.000        |       |
| DRB1        | 11         | SL       | P        | A        | 0.499        | -0.067        | 0.016        | 1.57E-05        | 0.999        |       |
| DRB1        | 11         | GL       | P        | A        | 0.144        | -0.097        | 0.022        | 1.70E-05        | 0.974        |       |
| DRB1        | 11         | PG       | P        | A        | 0.295        | 0.074         | 0.017        | 1.75E-05        | 1.000        |       |
| DRB1        | 11         | S        | P        | A        | 0.493        | -0.066        | 0.016        | 2.43E-05        | 0.987        |       |
| DRB1        | 11         | G        | P        | A        | 0.138        | -0.095        | 0.023        | 3.00E-05        | 1.000        |       |
| DRB1        | 11         | SVD      | P        | A        | 0.700        | -0.071        | 0.017        | 3.05E-05        | 0.985        |       |
| DRB1        | 12         |          | T        | K        | 0.493        | -0.066        | 0.016        | 2.43E-05        | 0.987        |       |
| DRB1        | 13         | R        | P        | A        | 0.156        | 0.201         | 0.021        | 8.06E-21        | 1.000        |       |
| DRB1        | 13         | RG       | P        | A        | 0.204        | 0.178         | 0.020        | 1.73E-19        | 0.932        |       |
| DRB1        | 13         | SYF      | P        | A        | 0.607        | -0.137        | 0.016        | 3.46E-17        | 0.953        |       |
| DRB1        | 13         | RH       | P        | A        | 0.345        | 0.134         | 0.016        | 2.90E-16        | 4.46E-22     | 1.000 |
| DRB1        | 13         | RF       | P        | A        | 0.180        | 0.165         | 0.020        | 8.99E-16        | 0.978        |       |
| DRB1        | 13         | SHY      | P        | A        | 0.772        | -0.151        | 0.019        | 2.90E-15        | 0.919        |       |
| DRB1        | 13         | SY       | P        | A        | 0.584        | -0.124        | 0.016        | 1.57E-14        | 0.941        |       |

|      |    |     |   |   |       |        |       |          |       |
|------|----|-----|---|---|-------|--------|-------|----------|-------|
| DRB1 | 13 | SYG | P | A | 0.632 | -0.120 | 0.016 | 1.45E-13 | 0.986 |
| DRB1 | 13 | SF  | P | A | 0.469 | -0.084 | 0.016 | 1.15E-07 | 0.955 |
| DRB1 | 13 | SFG | P | A | 0.517 | -0.076 | 0.016 | 1.06E-06 | 1.000 |
| DRB1 | 13 | YF  | P | A | 0.162 | -0.104 | 0.021 | 1.19E-06 | 0.976 |
| DRB1 | 13 | S   | P | A | 0.445 | -0.075 | 0.016 | 3.33E-06 | 0.942 |
| DRB1 | 13 | SHF | P | A | 0.657 | -0.076 | 0.017 | 5.54E-06 | 0.950 |
| DRB1 | 13 | RY  | P | A | 0.295 | 0.074  | 0.017 | 1.75E-05 | 1.000 |
| DRB1 | 13 | SG  | P | A | 0.493 | -0.066 | 0.016 | 2.43E-05 | 0.987 |
| DRB1 | 13 | Y   | P | A | 0.138 | -0.095 | 0.023 | 3.00E-05 | 1.000 |
| DRB1 | 13 | SRH | P | A | 0.790 | 0.082  | 0.020 | 3.84E-05 | 0.912 |
| DRB1 | 14 |     | K | E | 0.138 | -0.095 | 0.023 | 3.00E-05 | 1.000 |
| DRB1 | 16 | V   | P | A | 0.462 | -0.085 | 0.016 | 1.24E-07 | 0.944 |
| DRB1 | 16 | A   | P | A | 0.501 | 0.071  | 0.016 | 6.80E-06 | 0.986 |
| DRB1 | 25 |     | Q | R | 0.138 | -0.095 | 0.023 | 3.00E-05 | 1.000 |
| DRB1 | 26 | F   | P | A | 0.837 | 0.160  | 0.030 | 1.31E-07 | 0.343 |
| DRB1 | 28 | D   | P | A | 0.812 | 0.115  | 0.021 | 5.52E-08 | 0.882 |
| DRB1 | 28 | E   | P | A | 0.175 | -0.114 | 0.022 | 1.97E-07 | 0.876 |
| DRB1 | 30 | YH  | P | A | 0.838 | 0.104  | 0.021 | 1.19E-06 | 0.976 |
| DRB1 | 30 | Y   | P | A | 0.815 | 0.102  | 0.021 | 1.47E-06 | 0.898 |
| DRB1 | 30 | YCH | P | A | 0.844 | 0.102  | 0.022 | 2.20E-06 | 1.000 |
| DRB1 | 30 | YC  | P | A | 0.821 | 0.100  | 0.021 | 2.76E-06 | 0.918 |
| DRB1 | 30 | YHG | P | A | 0.850 | 0.102  | 0.022 | 3.79E-06 | 0.974 |
| DRB1 | 30 | YG  | P | A | 0.827 | 0.100  | 0.022 | 4.88E-06 | 0.893 |
| DRB1 | 30 | YHR | P | A | 0.844 | 0.099  | 0.022 | 5.48E-06 | 0.975 |
| DRB1 | 30 | YR  | P | A | 0.821 | 0.096  | 0.021 | 6.66E-06 | 0.896 |
| DRB1 | 30 | LR  | P | A | 0.144 | -0.100 | 0.022 | 6.87E-06 | 0.999 |
| DRB1 | 30 | YCG | P | A | 0.833 | 0.097  | 0.022 | 8.96E-06 | 0.913 |
| DRB1 | 30 | LG  | P | A | 0.151 | -0.097 | 0.022 | 9.89E-06 | 1.000 |
| DRB1 | 30 | YCR | P | A | 0.826 | 0.094  | 0.022 | 1.22E-05 | 0.916 |
| DRB1 | 30 | LC  | P | A | 0.144 | -0.097 | 0.022 | 1.70E-05 | 0.974 |
| DRB1 | 30 | YGR | P | A | 0.833 | 0.094  | 0.022 | 2.14E-05 | 0.890 |
| DRB1 | 30 | L   | P | A | 0.138 | -0.095 | 0.023 | 3.00E-05 | 1.000 |
| DRB1 | 30 | LH  | P | A | 0.161 | -0.092 | 0.022 | 3.86E-05 | 0.910 |
| DRB1 | 32 | NA  | H | Y | 0.392 | -0.099 | 0.019 | 8.47E-08 | 0.734 |
| DRB1 | 37 | S   | P | A | 0.169 | 0.197  | 0.021 | 4.65E-20 | 0.934 |
| DRB1 | 37 | SY  | P | A | 0.469 | 0.156  | 0.018 | 9.52E-18 | 0.714 |
| DRB1 | 37 | SL  | P | A | 0.184 | 0.177  | 0.021 | 2.59E-17 | 0.911 |
| DRB1 | 37 | NF  | P | A | 0.516 | -0.149 | 0.018 | 2.79E-16 | 0.703 |
| DRB1 | 37 | NL  | P | A | 0.376 | -0.100 | 0.019 | 1.57E-07 | 0.675 |
| DRB1 | 37 | N   | P | A | 0.361 | -0.094 | 0.019 | 1.14E-06 | 0.664 |

|      |     |    |   |   |       |        |       |          |          |       |
|------|-----|----|---|---|-------|--------|-------|----------|----------|-------|
| DRB1 | 37  | FL | P | A | 0.170 | -0.105 | 0.022 | 1.53E-06 |          | 0.885 |
| DRB1 | 37  | F  | P | A | 0.155 | -0.101 | 0.023 | 8.59E-06 |          | 0.898 |
| DRB1 | 57  | DS | P | A | 0.819 | 0.107  | 0.021 | 4.63E-07 |          | 0.895 |
| DRB1 | 57  | V  | P | A | 0.166 | -0.103 | 0.021 | 1.56E-06 |          | 0.969 |
| DRB1 | 60  | Y  | P | A | 0.819 | 0.107  | 0.021 | 4.63E-07 |          | 0.895 |
| DRB1 | 60  | S  | P | A | 0.166 | -0.103 | 0.021 | 1.56E-06 |          | 0.969 |
| DRB1 | 70  | Q  | P | A | 0.444 | 0.125  | 0.021 | 1.55E-09 |          | 0.471 |
| DRB1 | 70  | D  | P | A | 0.523 | -0.102 | 0.020 | 6.40E-07 |          | 0.488 |
| DRB1 | 71  | A  | P | A | 0.127 | 0.248  | 0.026 | 6.63E-21 |          | 0.785 |
| DRB1 | 71  | KA | P | A | 0.367 | 0.180  | 0.025 | 7.46E-13 | 7.18E-21 | 0.328 |
| DRB1 | 71  | KR | P | A | 0.632 | -0.103 | 0.021 | 1.27E-06 |          | 0.478 |
| DRB1 | 73  | NA | G | A | 0.259 | -0.142 | 0.022 | 1.08E-10 |          | 0.542 |
| DRB1 | 74  | AL | P | A | 0.700 | 0.146  | 0.021 | 9.98E-12 |          | 0.540 |
| DRB1 | 74  | RQ | P | A | 0.259 | -0.142 | 0.022 | 1.08E-10 |          | 0.542 |
| DRB1 | 74  | A  | P | A | 0.674 | 0.118  | 0.021 | 1.32E-08 |          | 0.554 |
| DRB1 | 74  | AE | P | A | 0.715 | 0.112  | 0.021 | 1.32E-07 | 1.11E-07 | 0.558 |
| DRB1 | 74  | QE | P | A | 0.180 | -0.103 | 0.022 | 3.32E-06 |          | 0.825 |
| DRB1 | 74  | RE | P | A | 0.162 | -0.140 | 0.032 | 1.51E-05 |          | 0.321 |
| DRB1 | 74  | Q  | P | A | 0.138 | -0.095 | 0.023 | 3.00E-05 |          | 1.000 |
| DRB1 | 78  | NA | V | Y | 0.151 | -0.097 | 0.022 | 9.89E-06 |          | 1.000 |
| DRB1 | 96  | Qx | P | A | 0.175 | 0.191  | 0.021 | 4.25E-19 |          | 0.910 |
| DRB1 | 96  | Q  | P | A | 0.162 | 0.188  | 0.021 | 7.37E-19 |          | 0.999 |
| DRB1 | 96  | QE | P | A | 0.186 | 0.183  | 0.021 | 9.58E-18 |          | 0.864 |
| DRB1 | 96  | HY | P | A | 0.801 | -0.183 | 0.021 | 1.34E-17 |          | 0.796 |
| DRB1 | 96  | HE | P | A | 0.637 | -0.134 | 0.017 | 9.51E-16 | 1.05E-19 | 0.946 |
| DRB1 | 96  | QY | P | A | 0.350 | 0.130  | 0.016 | 2.20E-15 |          | 0.997 |
| DRB1 | 96  | H  | P | A | 0.612 | -0.132 | 0.017 | 5.05E-15 |          | 0.867 |
| DRB1 | 96  | Hx | P | A | 0.626 | -0.129 | 0.017 | 7.53E-15 |          | 0.912 |
| DRB1 | 133 | R  | P | A | 0.818 | -0.205 | 0.022 | 4.34E-21 |          | 0.834 |
| DRB1 | 133 | L  | P | A | 0.156 | 0.201  | 0.021 | 7.00E-21 |          | 0.999 |
| DRB1 | 142 | V  | P | A | 0.818 | -0.205 | 0.022 | 4.34E-21 |          | 0.834 |
| DRB1 | 142 | M  | P | A | 0.156 | 0.201  | 0.021 | 7.00E-21 |          | 0.999 |
| DRB1 | 149 | H  | P | A | 0.449 | -0.072 | 0.017 | 1.61E-05 |          | 0.837 |
| DRB1 | 149 | Q  | P | A | 0.525 | 0.068  | 0.016 | 2.18E-05 |          | 0.919 |
| DRB1 | 181 | M  | P | A | 0.163 | -0.104 | 0.022 | 1.69E-06 |          | 0.949 |
| DRB1 | 233 | R  | P | A | 0.335 | -0.085 | 0.017 | 6.11E-07 |          | 0.954 |
| DRB1 | 233 | T  | P | A | 0.626 | 0.069  | 0.016 | 2.51E-05 |          | 0.985 |

**Table S15:** Associations for HLA amino acid (AA) sequence substitutions that were significantly associated ( $P < 4.6 \times 10^{-5}$ ) with seroreactivity to MCV. At each position that contained a significantly associated allele and >2 possible substitutions, we tested all common (frequency  $\geq 0.01$ ) haplotypes at that position using the omnibus test ( $P_{\text{omni}}$ ) in the conditional haplotype module of PLINK 1.07. Variants and haplotypes with the lowest p-value are indicated in bold and shaded.

| Gene | AA position | AA | A1 | A2 | FRQ   | BETA   | SE    | P        | $P_{\text{omni}}$ | INFO  |
|------|-------------|----|----|----|-------|--------|-------|----------|-------------------|-------|
| A    | 9           | T  | P  | A  | 0.077 | -0.204 | 0.037 | 2.69E-08 |                   | 0.996 |
| A    | 9           | FY | P  | A  | 0.805 | 0.124  | 0.025 | 5.37E-07 |                   | 0.991 |
| A    | 62          | L  | P  | A  | 0.040 | -0.360 | 0.050 | 9.71E-13 |                   | 0.998 |
| A    | 62          | EL | P  | A  | 0.135 | -0.178 | 0.029 | 5.32E-10 | 1.10E-12          | 0.999 |
| A    | 62          | QG | P  | A  | 0.768 | 0.105  | 0.024 | 8.24E-06 |                   | 0.940 |
| A    | 63          | Q  | P  | A  | 0.040 | -0.360 | 0.050 | 1.06E-12 |                   | 0.997 |
| A    | 77          | N  | P  | A  | 0.366 | -0.086 | 0.021 | 3.43E-05 |                   | 0.872 |
| A    | 97          | M  | P  | A  | 0.235 | -0.101 | 0.023 | 1.55E-05 |                   | 0.945 |
| A    | 97          | IR | P  | A  | 0.765 | 0.101  | 0.023 | 1.59E-05 |                   | 0.945 |
| B    | 143         | S  | P  | A  | 0.073 | -0.221 | 0.054 | 4.60E-05 |                   | 0.416 |
| B    | 147         | L  | P  | A  | 0.073 | -0.221 | 0.054 | 4.62E-05 |                   | 0.415 |
| B    | 178         | K  | P  | A  | 0.210 | -0.128 | 0.027 | 2.14E-06 |                   | 0.800 |
| B    | 178         | T  | P  | A  | 0.771 | 0.121  | 0.027 | 1.05E-05 |                   | 0.712 |
| C    | 99          | S  | P  | A  | 0.157 | -0.118 | 0.028 | 2.18E-05 |                   | 0.998 |
| C    | 116         | S  | P  | A  | 0.571 | -0.089 | 0.020 | 9.84E-06 |                   | 0.939 |
| C    | 116         | SL | P  | A  | 0.585 | -0.086 | 0.020 | 2.02E-05 | 1.11E-04          | 0.929 |
| C    | 152         | A  | P  | A  | 0.403 | -0.082 | 0.020 | 3.82E-05 |                   | 0.999 |
| DQA1 | 25          |    | F  | Y  | 0.310 | -0.111 | 0.022 | 6.43E-07 |                   | 0.858 |
| DQA1 | 41          |    | K  | R  | 0.171 | -0.155 | 0.029 | 6.74E-08 |                   | 0.816 |
| DQA1 | 129         | Q  | P  | A  | 0.224 | 0.152  | 0.024 | 3.32E-10 |                   | 0.831 |
| DQA1 | 129         | H  | P  | A  | 0.776 | -0.152 | 0.024 | 3.33E-10 |                   | 0.831 |
| DQA1 | 130         | S  | P  | A  | 0.829 | 0.155  | 0.029 | 6.53E-08 |                   | 0.817 |
| DQA1 | 130         | A  | P  | A  | 0.172 | -0.155 | 0.029 | 6.75E-08 |                   | 0.818 |
| DQB1 | -5          | S  | P  | A  | 0.150 | 0.210  | 0.026 | 1.07E-15 |                   | 0.992 |
| DQB1 | -5          | PL | P  | A  | 0.819 | -0.183 | 0.025 | 1.44E-13 |                   | 0.959 |
| DQB1 | -5          | L  | P  | A  | 0.211 | -0.138 | 0.024 | 1.73E-08 | 2.64E-17          | 0.970 |
| DQB1 | -5          | PS | P  | A  | 0.757 | 0.124  | 0.023 | 5.77E-08 |                   | 0.997 |
| DQB1 | -9          | I  | P  | A  | 0.150 | 0.210  | 0.026 | 1.07E-15 |                   | 0.992 |
| DQB1 | -9          | M  | P  | A  | 0.819 | -0.183 | 0.025 | 1.46E-13 |                   | 0.959 |
| DQB1 | -27         | S  | P  | A  | 0.150 | 0.210  | 0.026 | 1.06E-15 |                   | 0.992 |
| DQB1 | -27         | A  | P  | A  | 0.819 | -0.183 | 0.025 | 1.45E-13 |                   | 0.959 |
| DQB1 | 9           | YL | P  | A  | 0.836 | 0.201  | 0.028 | 1.07E-12 |                   | 0.912 |
| DQB1 | 9           | F  | P  | A  | 0.164 | -0.201 | 0.028 | 1.07E-12 | 2.11E-12          | 0.912 |

|             |           |          |          |          |              |               |              |                 |          |              |
|-------------|-----------|----------|----------|----------|--------------|---------------|--------------|-----------------|----------|--------------|
| DQB1        | 9         | Y        | P        | A        | 0.833        | 0.196         | 0.028        | 2.42E-12        |          | 0.913        |
| DQB1        | 9         | Yx       | P        | A        | 0.833        | 0.196         | 0.028        | 2.42E-12        |          | 0.913        |
| DQB1        | 14        | L        | P        | A        | 0.152        | 0.209         | 0.026        | 1.31E-15        |          | 0.992        |
| DQB1        | 14        | M        | P        | A        | 0.848        | -0.209        | 0.026        | 1.31E-15        |          | 0.992        |
| <b>DQB1</b> | <b>26</b> | <b>L</b> | <b>P</b> | <b>A</b> | <b>0.646</b> | <b>-0.173</b> | <b>0.020</b> | <b>7.03E-18</b> |          | <b>0.990</b> |
| DQB1        | 26        | G        | P        | A        | 0.174        | 0.176         | 0.025        | 1.74E-12        |          | 0.991        |
| DQB1        | 30        | H        | P        | A        | 0.246        | 0.154         | 0.023        | 1.44E-11        |          | 0.918        |
| DQB1        | 30        | Y        | P        | A        | 0.500        | -0.085        | 0.020        | 1.57E-05        |          | 0.939        |
| DQB1        | 38        |          | V        | A        | 0.409        | 0.087         | 0.019        | 7.43E-06        |          | 0.996        |
| DQB1        | 57        | AD       | P        | A        | 0.839        | -0.183        | 0.026        | 2.61E-12        |          | 0.937        |
| DQB1        | 57        | V        | P        | A        | 0.151        | 0.185         | 0.027        | 4.41E-12        |          | 0.939        |
| DQB1        | 71        | A        | P        | A        | 0.150        | 0.210         | 0.026        | 1.07E-15        |          | 0.992        |
| DQB1        | 71        | KT       | P        | A        | 0.827        | -0.176        | 0.025        | 1.70E-12        | 3.29E-14 | 0.992        |
| DQB1        | 71        | KA       | P        | A        | 0.404        | 0.086         | 0.019        | 8.82E-06        |          | 0.996        |
| DQB1        | 74        | S        | P        | A        | 0.173        | 0.176         | 0.025        | 1.72E-12        |          | 0.992        |
| DQB1        | 77        |          | R        | T        | 0.406        | 0.086         | 0.019        | 8.67E-06        |          | 0.995        |
| DQB1        | 87        | Y        | P        | A        | 0.182        | 0.185         | 0.025        | 9.74E-14        |          | 0.945        |
| DQB1        | 87        | LF       | P        | A        | 0.816        | -0.184        | 0.025        | 1.16E-13        | 8.92E-16 | 0.945        |
| DQB1        | 87        | F        | P        | A        | 0.212        | -0.139        | 0.025        | 1.71E-08        |          | 0.955        |
| DQB1        | 87        | LY       | P        | A        | 0.786        | 0.137         | 0.024        | 2.18E-08        |          | 0.956        |
| DQB1        | 116       | I        | P        | A        | 0.150        | 0.210         | 0.026        | 1.06E-15        |          | 0.992        |
| DQB1        | 116       | V        | P        | A        | 0.849        | -0.209        | 0.026        | 1.28E-15        |          | 0.992        |
| DQB1        | 125       | S        | P        | A        | 0.150        | 0.210         | 0.026        | 1.06E-15        |          | 0.992        |
| DQB1        | 125       | AG       | P        | A        | 0.849        | -0.209        | 0.026        | 1.28E-15        | 1.98E-17 | 0.992        |
| DQB1        | 125       | G        | P        | A        | 0.244        | -0.123        | 0.023        | 7.22E-08        |          | 0.998        |
| DQB1        | 125       | AS       | P        | A        | 0.752        | 0.122         | 0.023        | 7.50E-08        |          | 0.989        |
| DQB1        | 224       | Q        | P        | A        | 0.848        | -0.211        | 0.026        | 9.21E-16        |          | 0.975        |
| DQB1        | 224       | R        | P        | A        | 0.150        | 0.210         | 0.026        | 1.06E-15        |          | 0.992        |
| DRB1        | -1        | S        | P        | A        | 0.149        | -0.208        | 0.029        | 4.04E-13        |          | 0.994        |
| DRB1        | -1        | A        | P        | A        | 0.814        | 0.186         | 0.027        | 3.97E-12        |          | 0.921        |
| DRB1        | -16       | V        | P        | A        | 0.462        | 0.136         | 0.020        | 4.39E-12        |          | 0.944        |
| DRB1        | -16       | A        | P        | A        | 0.501        | -0.128        | 0.019        | 2.59E-11        |          | 0.986        |
| DRB1        | -17       | T        | P        | A        | 0.162        | -0.177        | 0.028        | 2.12E-10        |          | 0.977        |
| DRB1        | -17       | A        | P        | A        | 0.801        | 0.161         | 0.026        | 7.95E-10        |          | 0.911        |
| DRB1        | -25       | R        | P        | A        | 0.462        | 0.136         | 0.020        | 4.39E-12        |          | 0.944        |
| DRB1        | -25       | K        | P        | A        | 0.501        | -0.128        | 0.019        | 2.59E-11        |          | 0.986        |
| DRB1        | 9         | W        | P        | A        | 0.300        | -0.125        | 0.021        | 6.54E-09        |          | 0.985        |
| DRB1        | 9         | E        | P        | A        | 0.687        | 0.119         | 0.021        | 2.22E-08        |          | 0.985        |
| DRB1        | 10        | Q        | P        | A        | 0.501        | -0.128        | 0.019        | 2.61E-11        |          | 0.987        |
| DRB1        | 10        | Y        | P        | A        | 0.493        | 0.123         | 0.019        | 1.64E-10        |          | 0.987        |

|      |    |     |   |   |       |        |       |          |       |
|------|----|-----|---|---|-------|--------|-------|----------|-------|
| DRB1 | 11 | P   | P | A | 0.156 | -0.188 | 0.028 | 2.06E-11 | 1.000 |
| DRB1 | 11 | SLD | P | A | 0.511 | 0.128  | 0.019 | 2.13E-11 | 0.999 |
| DRB1 | 11 | SL  | P | A | 0.499 | 0.126  | 0.019 | 5.02E-11 | 0.999 |
| DRB1 | 11 | SD  | P | A | 0.506 | 0.125  | 0.019 | 7.20E-11 | 0.987 |
| DRB1 | 11 | S   | P | A | 0.493 | 0.123  | 0.019 | 1.64E-10 | 0.987 |
| DRB1 | 11 | PL  | P | A | 0.162 | -0.177 | 0.028 | 2.12E-10 | 0.977 |
| DRB1 | 11 | PD  | P | A | 0.168 | -0.171 | 0.027 | 2.87E-10 | 1.000 |
| DRB1 | 11 | PV  | P | A | 0.350 | -0.129 | 0.020 | 3.07E-10 | 0.999 |
| DRB1 | 11 | SGL | P | A | 0.638 | 0.124  | 0.020 | 9.28E-10 | 0.999 |
| DRB1 | 11 | SGD | P | A | 0.644 | 0.124  | 0.020 | 1.22E-09 | 0.986 |
| DRB1 | 11 | PG  | P | A | 0.295 | -0.130 | 0.021 | 1.63E-09 | 1.000 |
| DRB1 | 11 | SVG | P | A | 0.826 | 0.161  | 0.027 | 2.28E-09 | 0.978 |
| DRB1 | 11 | SG  | P | A | 0.632 | 0.120  | 0.020 | 3.47E-09 | 0.986 |
| DRB1 | 11 | SVL | P | A | 0.693 | 0.124  | 0.021 | 6.00E-09 | 1.000 |
| DRB1 | 11 | SVD | P | A | 0.700 | 0.125  | 0.021 | 6.54E-09 | 0.985 |
| DRB1 | 11 | SV  | P | A | 0.687 | 0.119  | 0.021 | 2.22E-08 | 0.985 |
| DRB1 | 12 |     | T | K | 0.493 | 0.123  | 0.019 | 1.64E-10 | 0.987 |
| DRB1 | 13 | SFG | P | A | 0.517 | 0.134  | 0.019 | 3.08E-12 | 1.000 |
| DRB1 | 13 | SF  | P | A | 0.469 | 0.131  | 0.019 | 1.52E-11 | 0.955 |
| DRB1 | 13 | R   | P | A | 0.156 | -0.188 | 0.028 | 2.06E-11 | 1.000 |
| DRB1 | 13 | RH  | P | A | 0.345 | -0.136 | 0.020 | 3.75E-11 | 1.000 |
| DRB1 | 13 | SG  | P | A | 0.493 | 0.123  | 0.019 | 1.64E-10 | 0.987 |
| DRB1 | 13 | S   | P | A | 0.445 | 0.121  | 0.020 | 6.14E-10 | 0.942 |
| DRB1 | 13 | SYF | P | A | 0.607 | 0.124  | 0.020 | 7.54E-10 | 0.953 |
| DRB1 | 13 | RY  | P | A | 0.295 | -0.130 | 0.021 | 1.63E-09 | 1.000 |
| DRB1 | 13 | SYG | P | A | 0.632 | 0.120  | 0.020 | 3.47E-09 | 0.986 |
| DRB1 | 13 | RG  | P | A | 0.204 | -0.144 | 0.025 | 1.71E-08 | 0.932 |
| DRB1 | 13 | SHF | P | A | 0.657 | 0.116  | 0.021 | 3.35E-08 | 0.950 |
| DRB1 | 13 | RF  | P | A | 0.180 | -0.147 | 0.027 | 3.44E-08 | 0.978 |
| DRB1 | 13 | SY  | P | A | 0.584 | 0.110  | 0.020 | 3.87E-08 | 0.941 |
| DRB1 | 13 | SHG | P | A | 0.682 | 0.111  | 0.021 | 1.40E-07 | 0.985 |
| DRB1 | 13 | SH  | P | A | 0.634 | 0.100  | 0.021 | 1.48E-06 | 0.938 |
| DRB1 | 13 | SHY | P | A | 0.772 | 0.115  | 0.025 | 3.01E-06 | 0.919 |
| DRB1 | 26 | F   | P | A | 0.837 | -0.229 | 0.037 | 4.19E-10 | 0.343 |
| DRB1 | 32 |     | H | Y | 0.392 | 0.144  | 0.023 | 2.22E-10 | 0.734 |
| DRB1 | 37 | S   | P | A | 0.169 | -0.169 | 0.028 | 1.60E-09 | 0.934 |
| DRB1 | 37 | SL  | P | A | 0.184 | -0.152 | 0.027 | 2.42E-08 | 0.911 |
| DRB1 | 37 | NL  | P | A | 0.376 | 0.124  | 0.023 | 1.20E-07 | 0.675 |
| DRB1 | 37 | N   | P | A | 0.361 | 0.121  | 0.024 | 3.22E-07 | 0.664 |
| DRB1 | 37 | SF  | P | A | 0.323 | -0.109 | 0.022 | 7.27E-07 | 0.898 |

|      |     |    |   |   |       |        |       |          |        |       |
|------|-----|----|---|---|-------|--------|-------|----------|--------|-------|
| DRB1 | 37  | SY | P | A | 0.469 | -0.110 | 0.023 | 1.05E-06 |        | 0.714 |
| DRB1 | 37  | NY | P | A | 0.662 | 0.102  | 0.022 | 2.83E-06 |        | 0.889 |
| DRB1 | 37  | NF | P | A | 0.516 | 0.105  | 0.023 | 3.25E-06 |        | 0.703 |
| DRB1 | 71  | A  | P | A | 0.127 | -0.232 | 0.035 | 2.30E-11 |        | 0.785 |
| DRB1 | 71  | KE | P | A | 0.481 | 0.111  | 0.026 | 2.27E-05 |        | 0.480 |
| DRB1 | 74  | RE | P | A | 0.162 | 0.226  | 0.039 | 9.06E-09 |        | 0.321 |
| DRB1 | 74  | AQ | P | A | 0.812 | -0.171 | 0.035 | 1.21E-06 | 0.0119 | 0.378 |
| DRB1 | 74  | RL | P | A | 0.146 | 0.174  | 0.040 | 1.35E-05 |        | 0.314 |
| DRB1 | 96  | QY | P | A | 0.350 | -0.129 | 0.020 | 2.54E-10 |        | 0.997 |
| DRB1 | 96  | Q  | P | A | 0.162 | -0.171 | 0.028 | 6.19E-10 |        | 0.999 |
| DRB1 | 96  | HE | P | A | 0.637 | 0.124  | 0.021 | 2.48E-09 |        | 0.946 |
| DRB1 | 96  | Qx | P | A | 0.175 | -0.157 | 0.028 | 1.98E-08 |        | 0.910 |
| DRB1 | 96  | Hx | P | A | 0.626 | 0.110  | 0.021 | 1.33E-07 |        | 0.912 |
| DRB1 | 96  | H  | P | A | 0.612 | 0.102  | 0.021 | 1.25E-06 |        | 0.867 |
| DRB1 | 96  | QE | P | A | 0.186 | -0.130 | 0.028 | 3.00E-06 |        | 0.864 |
| DRB1 | 133 | L  | P | A | 0.156 | -0.188 | 0.028 | 2.35E-11 |        | 0.999 |
| DRB1 | 133 | R  | P | A | 0.818 | 0.156  | 0.028 | 4.76E-08 |        | 0.834 |
| DRB1 | 140 | A  | P | A | 0.331 | -0.103 | 0.022 | 2.26E-06 |        | 0.907 |
| DRB1 | 142 | M  | P | A | 0.156 | -0.188 | 0.028 | 2.35E-11 |        | 0.999 |
| DRB1 | 142 | V  | P | A | 0.818 | 0.156  | 0.028 | 4.76E-08 |        | 0.834 |
| DRB1 | 149 | Q  | P | A | 0.525 | -0.113 | 0.020 | 1.12E-08 |        | 0.919 |
| DRB1 | 149 | H  | P | A | 0.449 | 0.102  | 0.021 | 6.48E-07 |        | 0.837 |



**Table S16:** Associations for HLA amino acid (AA) sequence substitutions that were significantly associated ( $P < 4.6 \times 10^{-5}$ ) with seroreactivity to HHV7. At each position that contained a significantly associated allele and >2 possible substitutions, we tested all common (frequency  $\geq 0.01$ ) haplotypes at that position using the omnibus test ( $P_{\text{omni}}$ ) in the conditional haplotype module of PLINK 1.07. Variants and haplotypes with the lowest p-value are indicated in bold and shaded.

| Gene | AA position | AA  | A1 | A2 | FRQ   | BETA   | SE    | P        | $P_{\text{omni}}$ | INFO  |
|------|-------------|-----|----|----|-------|--------|-------|----------|-------------------|-------|
| B    | 67          | SC  | P  | A  | 0.528 | -0.075 | 0.017 | 6.25E-06 |                   | 0.924 |
| B    | 116         | YDS | P  | A  | 0.807 | 0.142  | 0.032 | 7.34E-06 |                   | 0.324 |
| B    | 116         | Fx  | P  | A  | 0.119 | -0.139 | 0.034 | 3.83E-05 |                   | 0.427 |
| DPB1 | 178         | M   | P  | A  | 0.106 | -0.131 | 0.026 | 4.01E-07 |                   | 0.991 |
| DPB1 | 178         | L   | P  | A  | 0.892 | 0.131  | 0.026 | 4.38E-07 |                   | 0.975 |
| DQA1 | -16         | L   | P  | A  | 0.420 | -0.088 | 0.016 | 5.70E-08 |                   | 0.999 |
| DQA1 | -16         | M   | P  | A  | 0.580 | 0.088  | 0.016 | 6.46E-08 |                   | 0.998 |
| DQA1 | 11          | C   | P  | A  | 0.396 | -0.088 | 0.016 | 9.68E-08 |                   | 0.999 |
| DQA1 | 11          | Y   | P  | A  | 0.604 | 0.088  | 0.016 | 9.69E-08 |                   | 0.999 |
| DQA1 | 18          |     | F  | S  | 0.396 | -0.088 | 0.016 | 9.69E-08 |                   | 0.999 |
| DQA1 | 45          |     | A  | V  | 0.396 | -0.088 | 0.016 | 9.56E-08 |                   | 0.999 |
| DQA1 | 47          | R   | P  | A  | 0.395 | -0.088 | 0.016 | 9.46E-08 |                   | 0.997 |
| DQA1 | 47          | RC  | P  | A  | 0.660 | -0.085 | 0.017 | 3.59E-07 |                   | 0.996 |
| DQA1 | 48          |     | W  | L  | 0.396 | -0.088 | 0.016 | 9.65E-08 |                   | 0.999 |
| DQA1 | 50          | E   | P  | A  | 0.396 | -0.088 | 0.016 | 9.51E-08 |                   | 0.998 |
| DQA1 | 50          | L   | P  | A  | 0.340 | 0.085  | 0.017 | 3.60E-07 |                   | 0.996 |
| DQA1 | 52          | S   | P  | A  | 0.396 | -0.088 | 0.016 | 9.56E-08 |                   | 0.999 |
| DQA1 | 53          | K   | P  | A  | 0.396 | -0.088 | 0.016 | 9.65E-08 |                   | 0.999 |
| DQA1 | 53          | R   | P  | A  | 0.340 | 0.085  | 0.017 | 3.60E-07 |                   | 0.996 |
| DQA1 | 55          |     | G  | R  | 0.396 | -0.088 | 0.016 | 9.53E-08 |                   | 0.998 |
| DQA1 | 56          | G   | P  | A  | 0.396 | -0.088 | 0.016 | 9.53E-08 |                   | 0.998 |
| DQA1 | 61          |     | G  | F  | 0.396 | -0.088 | 0.016 | 9.65E-08 |                   | 0.999 |
| DQA1 | 64          |     | R  | T  | 0.396 | -0.088 | 0.016 | 9.53E-08 |                   | 0.998 |
| DQA1 | 66          |     | M  | I  | 0.396 | -0.088 | 0.016 | 9.65E-08 |                   | 0.999 |
| DQA1 | 69          | L   | P  | A  | 0.580 | 0.088  | 0.016 | 5.55E-08 |                   | 0.998 |
| DQA1 | 69          | A   | P  | A  | 0.396 | -0.088 | 0.016 | 9.65E-08 |                   | 0.999 |
| DQA1 | 76          | M   | P  | A  | 0.396 | -0.088 | 0.016 | 9.60E-08 |                   | 0.998 |
| DQA1 | 80          |     | Y  | S  | 0.396 | -0.088 | 0.016 | 9.65E-08 |                   | 0.999 |
| DQA1 | 129         | H   | P  | A  | 0.776 | 0.109  | 0.021 | 1.21E-07 |                   | 0.831 |
| DQA1 | 129         | Q   | P  | A  | 0.224 | -0.109 | 0.021 | 1.21E-07 |                   | 0.831 |
| DQA1 | 175         | Qx  | P  | A  | 0.396 | -0.088 | 0.016 | 9.83E-08 |                   | 0.999 |
| DQA1 | 175         | Q   | P  | A  | 0.396 | -0.088 | 0.016 | 9.87E-08 | 1.04E-07          | 0.999 |
| DQA1 | 175         | E   | P  | A  | 0.364 | 0.081  | 0.017 | 1.12E-06 |                   | 0.996 |

|             |           |          |          |          |              |               |              |                 |                   |
|-------------|-----------|----------|----------|----------|--------------|---------------|--------------|-----------------|-------------------|
| DQA1        | 175       | QK       | P        | A        | 0.636        | -0.081        | 0.017        | 1.12E-06        | 0.996             |
| DQA1        | 215       | L        | P        | A        | 0.339        | 0.084         | 0.017        | 5.26E-07        | 0.996             |
| DQA1        | 215       | F        | P        | A        | 0.661        | -0.084        | 0.017        | 5.27E-07        | 0.996             |
| DQA1        | 218       | R        | P        | A        | 0.603        | 0.086         | 0.016        | 1.63E-07        | 0.999             |
| DQA1        | 218       | Q        | P        | A        | 0.397        | -0.086        | 0.016        | 1.66E-07        | 0.999             |
| DQB1        | -4        | L        | P        | A        | 0.361        | -0.095        | 0.017        | 2.40E-08        | 0.976             |
| DQB1        | -4        | V        | P        | A        | 0.607        | 0.088         | 0.017        | 8.73E-08        | 0.997             |
| DQB1        | -5        | Px       | P        | A        | 0.639        | 0.095         | 0.017        | 2.40E-08        | 0.976             |
| DQB1        | -5        | P        | P        | A        | 0.607        | 0.088         | 0.017        | 8.72E-08        | 0.996             |
| DQB1        | -5        | S        | P        | A        | 0.150        | -0.120        | 0.023        | 1.45E-07        | 2.44E-08<br>0.992 |
| DQB1        | -5        | PL       | P        | A        | 0.819        | 0.103         | 0.021        | 1.48E-06        | 0.959             |
| DQB1        | -6        | Tx       | P        | A        | 0.637        | 0.095         | 0.017        | 2.23E-08        | 0.967             |
| DQB1        | -6        | S        | P        | A        | 0.361        | -0.095        | 0.017        | 2.40E-08        | 3.27E-07<br>0.976 |
| DQB1        | -6        | T        | P        | A        | 0.605        | 0.089         | 0.017        | 8.11E-08        | 0.988             |
| DQB1        | -6        | TA       | P        | A        | 0.607        | 0.088         | 0.017        | 8.72E-08        | 0.996             |
| DQB1        | -9        | I        | P        | A        | 0.150        | -0.120        | 0.023        | 1.45E-07        | 0.992             |
| DQB1        | -9        | M        | P        | A        | 0.819        | 0.103         | 0.021        | 1.48E-06        | 0.959             |
| DQB1        | -18       | V        | P        | A        | 0.534        | -0.066        | 0.016        | 4.27E-05        | 0.971             |
| DQB1        | -21       | D        | P        | A        | 0.361        | -0.095        | 0.017        | 2.40E-08        | 0.976             |
| DQB1        | -21       | G        | P        | A        | 0.607        | 0.089         | 0.017        | 8.59E-08        | 0.996             |
| DQB1        | -27       | S        | P        | A        | 0.150        | -0.120        | 0.023        | 1.45E-07        | 0.992             |
| DQB1        | -27       | A        | P        | A        | 0.819        | 0.103         | 0.021        | 1.47E-06        | 0.959             |
| DQB1        | 14        | L        | P        | A        | 0.152        | -0.114        | 0.023        | 4.75E-07        | 0.992             |
| DQB1        | 14        | M        | P        | A        | 0.848        | 0.114         | 0.023        | 4.78E-07        | 0.992             |
| DQB1        | 26        | G        | P        | A        | 0.174        | -0.101        | 0.021        | 2.28E-06        | 0.991             |
| <b>DQB1</b> | <b>30</b> | <b>H</b> | <b>P</b> | <b>A</b> | <b>0.246</b> | <b>-0.111</b> | <b>0.019</b> | <b>1.16E-08</b> | <b>0.918</b>      |
| DQB1        | 53        |          | Q        | L        | 0.395        | -0.088        | 0.016        | 9.66E-08        | 0.997             |
| DQB1        | 55        | R        | P        | A        | 0.417        | -0.086        | 0.016        | 1.43E-07        | 0.997             |
| DQB1        | 57        | V        | P        | A        | 0.151        | -0.123        | 0.023        | 8.14E-08        | 0.939             |
| DQB1        | 57        | AD       | P        | A        | 0.839        | 0.112         | 0.022        | 6.03E-07        | 2.48E-08<br>0.937 |
| DQB1        | 57        | AS       | P        | A        | 0.411        | 0.069         | 0.017        | 2.67E-05        | 0.981             |
| DQB1        | 70        | G        | P        | A        | 0.358        | -0.095        | 0.017        | 2.63E-08        | 0.965             |
| DQB1        | 70        | R        | P        | A        | 0.618        | 0.089         | 0.017        | 1.11E-07        | 0.966             |
| DQB1        | 71        | A        | P        | A        | 0.150        | -0.120        | 0.023        | 1.45E-07        | 0.992             |
| DQB1        | 71        | KT       | P        | A        | 0.827        | 0.101         | 0.021        | 2.27E-06        | 0.992             |
| DQB1        | 74        | S        | P        | A        | 0.173        | -0.101        | 0.021        | 2.28E-06        | 0.992             |
| DQB1        | 84        | E        | P        | A        | 0.393        | -0.091        | 0.017        | 3.98E-08        | 0.996             |
| DQB1        | 84        | Q        | P        | A        | 0.605        | 0.088         | 0.016        | 9.58E-08        | 0.996             |
| DQB1        | 85        | V        | P        | A        | 0.393        | -0.091        | 0.017        | 3.98E-08        | 0.996             |
| DQB1        | 85        | L        | P        | A        | 0.605        | 0.088         | 0.016        | 9.60E-08        | 0.997             |

|      |     |     |   |   |       |        |       |          |          |       |
|------|-----|-----|---|---|-------|--------|-------|----------|----------|-------|
| DQB1 | 86  | A   | P | A | 0.361 | -0.095 | 0.017 | 2.89E-08 |          | 0.965 |
| DQB1 | 86  | Ex  | P | A | 0.607 | 0.091  | 0.017 | 3.98E-08 | 5.71E-07 | 0.996 |
| DQB1 | 86  | EG  | P | A | 0.637 | 0.092  | 0.017 | 7.25E-08 |          | 0.965 |
| DQB1 | 86  | E   | P | A | 0.605 | 0.088  | 0.016 | 9.66E-08 |          | 0.996 |
| DQB1 | 87  | Lx  | P | A | 0.606 | 0.091  | 0.017 | 4.04E-08 |          | 0.997 |
| DQB1 | 87  | L   | P | A | 0.605 | 0.088  | 0.016 | 9.73E-08 | 2.41E-08 | 0.997 |
| DQB1 | 87  | Y   | P | A | 0.182 | -0.109 | 0.021 | 3.59E-07 |          | 0.945 |
| DQB1 | 87  | LF  | P | A | 0.816 | 0.104  | 0.021 | 1.04E-06 |          | 0.945 |
| DQB1 | 89  | G   | P | A | 0.393 | -0.091 | 0.017 | 3.97E-08 |          | 0.996 |
| DQB1 | 89  | T   | P | A | 0.605 | 0.088  | 0.016 | 9.59E-08 |          | 0.997 |
| DQB1 | 90  | I   | P | A | 0.394 | -0.091 | 0.017 | 4.01E-08 |          | 0.997 |
| DQB1 | 90  | T   | P | A | 0.605 | 0.088  | 0.016 | 9.66E-08 |          | 0.997 |
| DQB1 | 116 | I   | P | A | 0.150 | -0.120 | 0.023 | 1.46E-07 |          | 0.992 |
| DQB1 | 116 | V   | P | A | 0.849 | 0.114  | 0.023 | 4.75E-07 |          | 0.992 |
| DQB1 | 125 | Ax  | P | A | 0.606 | 0.091  | 0.017 | 4.01E-08 |          | 0.997 |
| DQB1 | 125 | A   | P | A | 0.605 | 0.088  | 0.016 | 9.64E-08 | 5.63E-09 | 0.998 |
| DQB1 | 125 | S   | P | A | 0.150 | -0.120 | 0.023 | 1.46E-07 |          | 0.992 |
| DQB1 | 125 | AG  | P | A | 0.849 | 0.114  | 0.023 | 4.75E-07 |          | 0.992 |
| DQB1 | 203 | V   | P | A | 0.391 | -0.091 | 0.017 | 3.70E-08 |          | 0.997 |
| DQB1 | 203 | I   | P | A | 0.606 | 0.088  | 0.017 | 1.03E-07 |          | 0.991 |
| DQB1 | 220 | R   | P | A | 0.394 | -0.090 | 0.017 | 4.47E-08 |          | 0.996 |
| DQB1 | 220 | H   | P | A | 0.603 | 0.089  | 0.017 | 9.20E-08 |          | 0.985 |
| DQB1 | 221 | Q   | P | A | 0.394 | -0.090 | 0.017 | 4.81E-08 |          | 0.995 |
| DQB1 | 221 | H   | P | A | 0.604 | 0.089  | 0.017 | 7.19E-08 |          | 0.986 |
| DQB1 | 224 | R   | P | A | 0.150 | -0.120 | 0.023 | 1.46E-07 |          | 0.992 |
| DQB1 | 224 | Q   | P | A | 0.848 | 0.117  | 0.023 | 2.78E-07 |          | 0.975 |
| DRB1 | -16 | A   | P | A | 0.501 | 0.067  | 0.016 | 2.69E-05 |          | 0.986 |
| DRB1 | -25 | K   | P | A | 0.501 | 0.067  | 0.016 | 2.69E-05 |          | 0.986 |
| DRB1 | 10  | Q   | P | A | 0.501 | 0.067  | 0.016 | 2.65E-05 |          | 0.987 |
| DRB1 | 11  | VG  | P | A | 0.332 | 0.085  | 0.017 | 4.64E-07 |          | 0.999 |
| DRB1 | 11  | SPL | P | A | 0.655 | -0.080 | 0.017 | 1.74E-06 |          | 0.999 |
| DRB1 | 11  | SLD | P | A | 0.511 | -0.075 | 0.016 | 3.04E-06 |          | 0.999 |
| DRB1 | 11  | SPD | P | A | 0.662 | -0.077 | 0.017 | 4.48E-06 | 3.68E-07 | 0.986 |
| DRB1 | 11  | SL  | P | A | 0.499 | -0.071 | 0.016 | 8.07E-06 |          | 0.999 |
| DRB1 | 11  | SP  | P | A | 0.650 | -0.072 | 0.017 | 1.46E-05 |          | 0.986 |
| DRB1 | 11  | SD  | P | A | 0.506 | -0.068 | 0.016 | 2.07E-05 |          | 0.987 |
| DRB1 | 13  | HY  | P | A | 0.327 | 0.088  | 0.017 | 1.80E-07 |          | 0.999 |
| DRB1 | 13  | SFG | P | A | 0.517 | -0.077 | 0.016 | 1.46E-06 | 7.25E-07 | 1     |
| DRB1 | 13  | SRF | P | A | 0.625 | -0.075 | 0.017 | 7.74E-06 |          | 0.952 |
| DRB1 | 13  | SRG | P | A | 0.650 | -0.072 | 0.017 | 1.46E-05 |          | 0.986 |

|      |     |    |   |   |       |        |       |          |       |
|------|-----|----|---|---|-------|--------|-------|----------|-------|
| DRB1 | 13  | SF | P | A | 0.469 | -0.069 | 0.016 | 2.43E-05 | 0.955 |
| DRB1 | 98  | E  | P | A | 0.339 | 0.083  | 0.017 | 6.70E-07 | 0.998 |
| DRB1 | 98  | K  | P | A | 0.648 | -0.081 | 0.017 | 1.78E-06 | 0.946 |
| DRB1 | 104 | A  | P | A | 0.339 | 0.083  | 0.017 | 6.70E-07 | 0.998 |
| DRB1 | 104 | S  | P | A | 0.638 | -0.079 | 0.017 | 4.15E-06 | 0.906 |

**Table S17:** Associations for HLA amino acid (AA) sequence substitutions that were significantly associated ( $P < 4.6 \times 10^{-5}$ ) with seroreactivity to HHV6 IE1A and HHV6 IE1B. At each position that contained a significantly associated allele and >2 possible substitutions, we tested all common (frequency  $\geq 0.01$ ) haplotypes at that position using the omnibus test ( $P_{\text{omni}}$ ) in the conditional haplotype module of PLINK 1.07. Variants and haplotypes with the lowest p-value are indicated in bold and shaded.

| Phenotype        | Gene     | AA position | AA       | A1       | A2       | FRQ          | BETA          | SE           | P               | $P_{\text{omni}}$ | INFO  |
|------------------|----------|-------------|----------|----------|----------|--------------|---------------|--------------|-----------------|-------------------|-------|
| HHV6 IE1A        | B        | 97          | SWV      | P        | A        | 0.355        | -0.088        | 0.020        | 8.91E-06        |                   | 0.919 |
| HHV6 IE1A        | B        | 97          | RN       | P        | A        | 0.534        | 0.088         | 0.020        | 9.71E-06        |                   | 0.780 |
| HHV6 IE1A        | B        | 97          | SV       | P        | A        | 0.350        | -0.088        | 0.020        | 9.87E-06        |                   | 0.924 |
| HHV6 IE1A        | B        | 97          | STV      | P        | A        | 0.461        | -0.088        | 0.020        | 1.03E-05        |                   | 0.782 |
| HHV6 IE1A        | B        | 97          | R        | P        | A        | 0.478        | 0.085         | 0.020        | 1.85E-05        | 4.43E-04          | 0.776 |
| HHV6 IE1A        | B        | 97          | RW       | P        | A        | 0.483        | 0.085         | 0.020        | 2.00E-05        |                   | 0.779 |
| HHV6 IE1A        | B        | 97          | RT       | P        | A        | 0.589        | 0.081         | 0.019        | 2.86E-05        |                   | 0.916 |
| HHV6 IE1A        | B        | 97          | SW       | P        | A        | 0.318        | -0.086        | 0.021        | 3.10E-05        |                   | 0.908 |
| HHV6 IE1A        | B        | 97          | SNV      | P        | A        | 0.407        | -0.081        | 0.019        | 3.20E-05        |                   | 0.921 |
| HHV6 IE1A        | B        | 97          | S        | P        | A        | 0.313        | -0.084        | 0.021        | 3.92E-05        |                   | 0.926 |
| <b>HHV6 IE1A</b> | <b>C</b> | <b>116</b>  | <b>S</b> | <b>P</b> | <b>A</b> | <b>0.571</b> | <b>-0.099</b> | <b>0.019</b> | <b>1.80E-07</b> |                   | 0.939 |
| HHV6 IE1A        | C        | 116         | SL       | P        | A        | 0.585        | -0.094        | 0.019        | 8.69E-07        | <b>4.56E-06</b>   | 0.929 |
| HHV6 IE1A        | C        | 116         | SY       | P        | A        | 0.727        | -0.085        | 0.020        | 2.96E-05        |                   | 0.993 |
| HHV6 IE1A        | C        | 156         | RD       | P        | A        | 0.282        | 0.094         | 0.021        | 5.99E-06        | 2.94E-04          | 0.944 |
| HHV6 IE1A        | C        | 156         | R        | P        | A        | 0.265        | 0.091         | 0.021        | 1.47E-05        |                   | 0.943 |
| HHV6 IE1B        | DQA1     | 25          |          | F        | Y        | 0.310        | 0.083         | 0.020        | 4.40E-05        |                   | 0.858 |
| HHV6 IE1B        | DQA1     | 47          | K        | P        | A        | 0.136        | 0.125         | 0.026        | 1.42E-06        |                   | 0.979 |
| HHV6 IE1B        | DQA1     | 52          | H        | P        | A        | 0.136        | 0.125         | 0.026        | 1.42E-06        |                   | 0.979 |
| HHV6 IE1B        | DQA1     | 54          |          | L        | F        | 0.136        | 0.125         | 0.026        | 1.42E-06        |                   | 0.979 |
| HHV6 IE1B        | DQB1     | 135         | G        | P        | A        | 0.100        | 0.126         | 0.029        | 1.70E-05        |                   | 0.993 |
| HHV6 IE1B        | DQB1     | 135         | D        | P        | A        | 0.898        | -0.118        | 0.029        | 4.15E-05        |                   | 0.991 |
| HHV6 IE1B        | DRB1     | 4           | Q        | P        | A        | 0.151        | 0.106         | 0.025        | 1.60E-05        |                   | 1.000 |
| HHV6 IE1B        | DRB1     | 4           | R        | P        | A        | 0.846        | -0.106        | 0.025        | 1.65E-05        |                   | 0.974 |
| HHV6 IE1B        | DRB1     | 11          | G        | P        | A        | 0.138        | 0.120         | 0.025        | 2.62E-06        |                   | 1.000 |
| HHV6 IE1B        | DRB1     | 11          | GL       | P        | A        | 0.144        | 0.112         | 0.025        | 9.45E-06        | 1.46E-05          | 0.974 |
| HHV6 IE1B        | DRB1     | 11          | GD       | P        | A        | 0.151        | 0.106         | 0.025        | 1.60E-05        |                   | 1.000 |
| HHV6 IE1B        | DRB1     | 13          | Y        | P        | A        | 0.138        | 0.120         | 0.025        | 2.62E-06        |                   | 1.000 |
| HHV6 IE1B        | DRB1     | 13          | YG       | P        | A        | 0.186        | 0.097         | 0.023        | 3.37E-05        | <b>1.14E-05</b>   | 0.924 |
| HHV6 IE1B        | DRB1     | 13          | YF       | P        | A        | 0.162        | 0.099         | 0.024        | 4.19E-05        |                   | 0.976 |
| HHV6 IE1B        | DRB1     | 14          | NA       | K        | E        | 0.138        | 0.120         | 0.025        | 2.62E-06        |                   | 1.000 |
| HHV6 IE1B        | DRB1     | 25          | NA       | Q        | R        | 0.138        | 0.120         | 0.025        | 2.62E-06        |                   | 1.000 |
| HHV6 IE1B        | DRB1     | 28          | E        | P        | A        | 0.175        | 0.106         | 0.025        | 1.64E-05        |                   | 0.876 |
| HHV6 IE1B        | DRB1     | 30          | LR       | P        | A        | 0.144        | 0.118         | 0.025        | 2.35E-06        | 1.53E-04          | 0.999 |

|                  |             |           |          |          |          |              |              |              |                 |              |
|------------------|-------------|-----------|----------|----------|----------|--------------|--------------|--------------|-----------------|--------------|
| HHV6 IE1B        | DRB1        | 30        | L        | P        | A        | 0.138        | 0.120        | 0.025        | 2.62E-06        | 1.000        |
| HHV6 IE1B        | DRB1        | 30        | YCG      | P        | A        | 0.833        | -0.111       | 0.025        | 7.40E-06        | 0.913        |
| HHV6 IE1B        | DRB1        | 30        | YHG      | P        | A        | 0.850        | -0.111       | 0.025        | 8.29E-06        | 0.974        |
| HHV6 IE1B        | DRB1        | 30        | LH       | P        | A        | 0.161        | 0.112        | 0.025        | 8.43E-06        | 0.910        |
| HHV6 IE1B        | DRB1        | 30        | LC       | P        | A        | 0.144        | 0.112        | 0.025        | 9.45E-06        | 0.974        |
| HHV6 IE1B        | DRB1        | 30        | YCH      | P        | A        | 0.844        | -0.105       | 0.024        | 1.39E-05        | 1.000        |
| HHV6 IE1B        | DRB1        | 30        | LG       | P        | A        | 0.151        | 0.106        | 0.025        | 1.60E-05        | 1.000        |
| HHV6 IE1B        | DRB1        | 30        | YG       | P        | A        | 0.827        | -0.104       | 0.025        | 2.35E-05        | 0.893        |
| HHV6 IE1B        | DRB1        | 30        | YGR      | P        | A        | 0.833        | -0.105       | 0.025        | 2.71E-05        | 0.890        |
| HHV6 IE1B        | DRB1        | 30        | YC       | P        | A        | 0.821        | -0.099       | 0.024        | 3.60E-05        | 0.918        |
| HHV6 IE1B        | DRB1        | 30        | YH       | P        | A        | 0.838        | -0.099       | 0.024        | 4.19E-05        | 0.976        |
| HHV6 IE1B        | DRB1        | 30        | YCR      | P        | A        | 0.826        | -0.099       | 0.024        | 4.20E-05        | 0.916        |
| HHV6 IE1B        | DRB1        | 37        | F        | P        | A        | 0.155        | 0.118        | 0.025        | 3.63E-06        | 0.898        |
| HHV6 IE1B        | DRB1        | 37        | FL       | P        | A        | 0.170        | 0.107        | 0.025        | 1.44E-05        | 0.885        |
| HHV6 IE1B        | DRB1        | 57        | V        | P        | A        | 0.166        | 0.098        | 0.024        | 4.62E-05        | 0.969        |
| HHV6 IE1B        | DRB1        | 60        | S        | P        | A        | 0.166        | 0.098        | 0.024        | 4.62E-05        | 0.969        |
| <b>HHV6 IE1B</b> | <b>DRB1</b> | <b>67</b> | <b>I</b> | <b>P</b> | <b>A</b> | <b>0.526</b> | <b>0.131</b> | <b>0.023</b> | <b>1.57E-08</b> | <b>0.496</b> |
| HHV6 IE1B        | DRB1        | 67        | L        | P        | A        | 0.344        | -0.116       | 0.023        | 6.80E-07        | 0.524        |
| HHV6 IE1B        | DRB1        | 70        | D        | P        | A        | 0.523        | 0.125        | 0.023        | 8.81E-08        | 0.488        |
| HHV6 IE1B        | DRB1        | 70        | Q        | P        | A        | 0.444        | -0.123       | 0.024        | 1.73E-07        | 0.471        |
| HHV6 IE1B        | DRB1        | 71        | KA       | P        | A        | 0.367        | -0.117       | 0.028        | 4.00E-05        | 0.328        |
| HHV6 IE1B        | DRB1        | 74        | Q        | P        | A        | 0.138        | 0.120        | 0.025        | 2.62E-06        | 1.000        |
| HHV6 IE1B        | DRB1        | 74        | QL       | P        | A        | 0.164        | 0.106        | 0.024        | 1.04E-05        | 0.988        |
| HHV6 IE1B        | DRB1        | 78        |          | V        | Y        | 0.151        | 0.106        | 0.025        | 1.60E-05        | 1.000        |
| HHV6 IE1B        | DRB1        | 180       | V        | P        | A        | 0.752        | 0.095        | 0.023        | 2.86E-05        | 0.780        |
| HHV6 IE1B        | DRB1        | 181       | M        | P        | A        | 0.163        | 0.106        | 0.024        | 1.44E-05        | 0.949        |

8.68E-05

**Table S18:** Associations for HLA amino acid (AA) sequence substitutions that were significantly associated ( $P < 4.6 \times 10^{-5}$ ) with seroreactivity to EBV ZEBRA. At each position that contained a significantly associated allele and >2 possible substitutions, we tested all common (frequency  $\geq 0.01$ ) haplotypes at that position using the omnibus test ( $P_{\text{omni}}$ ) in the conditional haplotype module of PLINK 1.07. Variants and haplotypes with the lowest p-value are indicated in bold and shaded.

| Gene | AA position | AA | A1 | A2 | FRQ   | BETA   | SE    | P        | $P_{\text{omni}}$ | INFO  |
|------|-------------|----|----|----|-------|--------|-------|----------|-------------------|-------|
| A    | -11         | L  | P  | A  | 0.111 | 0.142  | 0.026 | 5.87E-08 |                   | 0.996 |
| A    | -11         | S  | P  | A  | 0.888 | -0.141 | 0.026 | 7.34E-08 |                   | 0.983 |
| A    | 9           | T  | P  | A  | 0.077 | 0.161  | 0.030 | 1.20E-07 |                   | 0.996 |
| A    | 9           | FY | P  | A  | 0.805 | -0.089 | 0.021 | 1.64E-05 |                   | 0.991 |
| A    | 62          | L  | P  | A  | 0.040 | 0.193  | 0.041 | 2.75E-06 |                   | 0.998 |
| A    | 63          | Q  | P  | A  | 0.040 | 0.193  | 0.041 | 2.86E-06 |                   | 0.997 |
| A    | 70          |    | Q  | H  | 0.301 | 0.087  | 0.019 | 3.19E-06 |                   | 0.905 |
| A    | 144         | Q  | P  | A  | 0.189 | 0.117  | 0.022 | 1.16E-07 |                   | 0.913 |
| A    | 144         | K  | P  | A  | 0.811 | -0.117 | 0.022 | 1.18E-07 |                   | 0.913 |
| A    | 151         |    | R  | H  | 0.145 | 0.147  | 0.025 | 2.02E-09 |                   | 0.885 |
| A    | 152         | AV | P  | A  | 0.791 | -0.094 | 0.021 | 6.40E-06 |                   | 0.946 |
| A    | 152         | ER | P  | A  | 0.200 | 0.092  | 0.021 | 1.75E-05 | 3.84E-06          | 0.892 |
| A    | 152         | EW | P  | A  | 0.197 | 0.091  | 0.022 | 2.39E-05 |                   | 0.892 |
| A    | 156         | L  | P  | A  | 0.556 | 0.080  | 0.018 | 7.73E-06 |                   | 0.851 |
| A    | 161         |    | D  | E  | 0.146 | 0.106  | 0.023 | 6.47E-06 |                   | 0.999 |
| A    | 246         | A  | P  | A  | 0.845 | -0.105 | 0.023 | 4.26E-06 |                   | 0.998 |
| A    | 246         | S  | P  | A  | 0.155 | 0.105  | 0.023 | 4.28E-06 |                   | 0.999 |
| A    | 298         | F  | P  | A  | 0.110 | 0.136  | 0.026 | 2.23E-07 |                   | 1.000 |
| A    | 298         | I  | P  | A  | 0.877 | -0.125 | 0.026 | 1.47E-06 |                   | 0.880 |
| A    | 299         | A  | P  | A  | 0.155 | 0.105  | 0.023 | 4.50E-06 |                   | 0.999 |
| A    | 299         | T  | P  | A  | 0.832 | -0.098 | 0.023 | 1.76E-05 |                   | 0.906 |
| A    | 307         | R  | P  | A  | 0.110 | 0.136  | 0.026 | 2.23E-07 |                   | 1.000 |
| A    | 307         | M  | P  | A  | 0.877 | -0.125 | 0.026 | 1.46E-06 |                   | 0.880 |
| A    | 334         | M  | P  | A  | 0.155 | 0.105  | 0.023 | 4.17E-06 |                   | 0.999 |
| A    | 334         | V  | P  | A  | 0.833 | -0.098 | 0.023 | 1.68E-05 |                   | 0.906 |
| B    | 9           | D  | P  | A  | 0.146 | -0.155 | 0.023 | 3.84E-11 |                   | 0.999 |
| B    | 24          | T  | P  | A  | 0.333 | 0.116  | 0.017 | 1.66E-11 |                   | 0.988 |
| B    | 24          | S  | P  | A  | 0.416 | -0.077 | 0.017 | 4.02E-06 |                   | 0.982 |
| B    | 32          |    | L  | Q  | 0.313 | 0.115  | 0.018 | 6.95E-11 |                   | 0.988 |
| B    | 41          |    | T  | A  | 0.276 | 0.111  | 0.018 | 1.29E-09 |                   | 0.977 |
| B    | 45          | K  | P  | A  | 0.257 | 0.111  | 0.019 | 3.52E-09 |                   | 0.975 |
| B    | 45          | KG | P  | A  | 0.259 | 0.111  | 0.019 | 3.81E-09 | 3.84E-08          | 0.968 |
| B    | 45          | KM | P  | A  | 0.383 | 0.094  | 0.017 | 3.25E-08 |                   | 0.963 |

|      |     |     |   |   |       |        |       |          |          |       |
|------|-----|-----|---|---|-------|--------|-------|----------|----------|-------|
| B    | 45  | ET  | P | A | 0.615 | -0.094 | 0.017 | 3.39E-08 |          | 0.957 |
| B    | 63  |     | E | N | 0.480 | 0.105  | 0.017 | 1.78E-09 |          | 0.869 |
| B    | 67  | F   | P | A | 0.246 | -0.138 | 0.020 | 7.87E-12 |          | 0.881 |
| B    | 67  | FM  | P | A | 0.301 | -0.121 | 0.018 | 3.81E-11 |          | 0.950 |
| B    | 67  | SC  | P | A | 0.528 | 0.096  | 0.017 | 1.94E-08 |          | 0.924 |
| B    | 67  | YF  | P | A | 0.416 | -0.096 | 0.018 | 5.27E-08 | 3.79E-10 | 0.873 |
| B    | 67  | YS  | P | A | 0.573 | 0.092  | 0.017 | 7.57E-08 |          | 0.932 |
| B    | 67  | FC  | P | A | 0.371 | -0.095 | 0.018 | 1.45E-07 |          | 0.875 |
| B    | 67  | S   | P | A | 0.403 | 0.086  | 0.017 | 8.36E-07 |          | 0.903 |
| B    | 67  | SM  | P | A | 0.458 | 0.081  | 0.018 | 4.74E-06 |          | 0.855 |
| B    | 80  | T   | P | A | 0.236 | 0.100  | 0.023 | 1.06E-05 |          | 0.675 |
| B    | 97  | SW  | P | A | 0.318 | -0.084 | 0.019 | 5.69E-06 |          | 0.908 |
| B    | 97  | S   | P | A | 0.313 | -0.083 | 0.019 | 7.85E-06 | 2.54E-04 | 0.926 |
| B    | 97  | SWV | P | A | 0.355 | -0.077 | 0.018 | 1.99E-05 |          | 0.919 |
| B    | 97  | SV  | P | A | 0.350 | -0.076 | 0.018 | 2.43E-05 |          | 0.924 |
| B    | 113 | H   | P | A | 0.712 | -0.085 | 0.020 | 1.61E-05 |          | 0.798 |
| B    | 113 | Y   | P | A | 0.269 | 0.083  | 0.019 | 1.97E-05 |          | 0.877 |
| B    | 116 | YFS | P | A | 0.707 | -0.096 | 0.020 | 1.16E-06 |          | 0.769 |
| B    | 116 | DL  | P | A | 0.275 | 0.094  | 0.020 | 1.57E-06 |          | 0.843 |
| B    | 116 | Dx  | P | A | 0.219 | 0.111  | 0.024 | 4.38E-06 | 5.88E-05 | 0.596 |
| B    | 116 | D   | P | A | 0.201 | 0.109  | 0.024 | 5.23E-06 |          | 0.675 |
| B    | 116 | YS  | P | A | 0.606 | -0.083 | 0.020 | 3.52E-05 |          | 0.648 |
| B    | 143 | S   | P | A | 0.073 | 0.207  | 0.045 | 4.00E-06 |          | 0.416 |
| B    | 143 | T   | P | A | 0.909 | -0.199 | 0.044 | 5.80E-06 |          | 0.320 |
| B    | 147 | L   | P | A | 0.073 | 0.208  | 0.045 | 3.94E-06 |          | 0.415 |
| B    | 147 | W   | P | A | 0.909 | -0.199 | 0.044 | 5.79E-06 |          | 0.319 |
| B    | 156 | DW  | P | A | 0.311 | -0.096 | 0.022 | 1.72E-05 |          | 0.529 |
| B    | 156 | Dx  | P | A | 0.287 | -0.097 | 0.023 | 1.94E-05 | 0.41     | 0.529 |
| B    | 156 | D   | P | A | 0.268 | -0.094 | 0.022 | 2.59E-05 |          | 0.587 |
| B    | 163 | EL  | P | A | 0.701 | 0.119  | 0.020 | 1.75E-09 | 5.6E-08  | 0.804 |
| B    | 163 | T   | P | A | 0.280 | -0.116 | 0.019 | 2.78E-09 |          | 0.881 |
| B    | 163 | Ex  | P | A | 0.305 | 0.082  | 0.020 | 4.58E-05 |          | 0.747 |
| C    | 66  |     | N | K | 0.201 | -0.114 | 0.021 | 3.04E-08 |          | 0.998 |
| C    | 156 | Q   | P | A | 0.043 | 0.221  | 0.041 | 9.05E-08 |          | 0.918 |
| C    | 156 | DQ  | P | A | 0.060 | 0.154  | 0.035 | 1.10E-05 | 1.26E-06 | 0.938 |
| C    | 156 | WQ  | P | A | 0.207 | 0.085  | 0.020 | 2.79E-05 |          | 0.997 |
| C    | 193 | P   | P | A | 0.954 | -0.205 | 0.038 | 8.07E-08 |          | 0.995 |
| C    | 193 | L   | P | A | 0.046 | 0.204  | 0.038 | 9.05E-08 |          | 0.998 |
| DPA1 | 31  |     | Q | M | 0.174 | -0.091 | 0.022 | 2.64E-05 |          | 0.987 |
| DPA1 | 50  |     | R | Q | 0.174 | -0.092 | 0.022 | 2.32E-05 |          | 0.987 |



|      |     |    |   |   |       |        |       |          |          |       |
|------|-----|----|---|---|-------|--------|-------|----------|----------|-------|
| DPA1 | 83  |    | A | T | 0.175 | -0.090 | 0.022 | 3.12E-05 |          | 0.986 |
| DPA1 | 111 | R  | P | A | 0.174 | -0.091 | 0.022 | 2.64E-05 |          | 0.987 |
| DPA1 | 111 | K  | P | A | 0.825 | 0.090  | 0.022 | 3.53E-05 |          | 0.986 |
| DPA1 | 127 | P  | P | A | 0.174 | -0.092 | 0.022 | 2.31E-05 |          | 0.986 |
| DPA1 | 127 | L  | P | A | 0.825 | 0.090  | 0.022 | 3.11E-05 |          | 0.986 |
| DPA1 | 160 | V  | P | A | 0.174 | -0.092 | 0.022 | 2.32E-05 |          | 0.987 |
| DPA1 | 160 | F  | P | A | 0.825 | 0.090  | 0.022 | 3.14E-05 |          | 0.986 |
| DPA1 | 228 | P  | P | A | 0.174 | -0.092 | 0.022 | 2.34E-05 |          | 0.986 |
| DPA1 | 228 | T  | P | A | 0.825 | 0.090  | 0.022 | 3.15E-05 |          | 0.987 |
| DQA1 | -16 | M  | P | A | 0.580 | 0.112  | 0.017 | 1.53E-11 |          | 0.998 |
| DQA1 | -16 | L  | P | A | 0.420 | -0.112 | 0.017 | 1.66E-11 |          | 0.999 |
| DQA1 | 11  | C  | P | A | 0.396 | -0.148 | 0.017 | 1.88E-18 |          | 0.999 |
| DQA1 | 11  | Y  | P | A | 0.604 | 0.148  | 0.017 | 1.88E-18 |          | 0.999 |
| DQA1 | 18  |    | F | S | 0.396 | -0.148 | 0.017 | 1.89E-18 |          | 0.999 |
| DQA1 | 25  |    | F | Y | 0.310 | 0.087  | 0.019 | 3.98E-06 |          | 0.858 |
| DQA1 | 26  |    | S | T | 0.204 | 0.164  | 0.020 | 6.12E-16 |          | 0.980 |
| DQA1 | 34  |    | E | Q | 0.484 | 0.184  | 0.016 | 1.87E-29 |          | 0.989 |
| DQA1 | 40  |    | G | E | 0.264 | -0.117 | 0.019 | 4.09E-10 |          | 0.995 |
| DQA1 | 41  |    | K | R | 0.171 | -0.114 | 0.024 | 1.59E-06 |          | 0.816 |
| DQA1 | 45  |    | A | V | 0.396 | -0.148 | 0.017 | 1.85E-18 |          | 0.999 |
| DQA1 | 47  | RC | P | A | 0.660 | -0.252 | 0.017 | 2.71E-49 |          | 0.996 |
| DQA1 | 47  | K  | P | A | 0.136 | 0.262  | 0.024 | 6.18E-28 |          | 0.979 |
| DQA1 | 47  | R  | P | A | 0.395 | -0.148 | 0.017 | 1.83E-18 | 6.10E-50 | 0.997 |
| DQA1 | 47  | Q  | P | A | 0.204 | 0.164  | 0.020 | 6.12E-16 |          | 0.980 |
| DQA1 | 47  | C  | P | A | 0.264 | -0.117 | 0.019 | 4.12E-10 |          | 0.996 |
| DQA1 | 48  |    | W | L | 0.396 | -0.148 | 0.017 | 1.85E-18 |          | 0.999 |
| DQA1 | 50  | L  | P | A | 0.340 | 0.252  | 0.017 | 2.70E-49 |          | 0.996 |
| DQA1 | 50  | E  | P | A | 0.396 | -0.148 | 0.017 | 1.84E-18 | 1.54E-48 | 0.998 |
| DQA1 | 50  | V  | P | A | 0.264 | -0.117 | 0.019 | 4.13E-10 |          | 0.995 |
| DQA1 | 51  |    | L | F | 0.264 | -0.116 | 0.019 | 4.13E-10 |          | 0.996 |
| DQA1 | 52  | H  | P | A | 0.136 | 0.262  | 0.024 | 6.18E-28 |          | 0.979 |
| DQA1 | 52  | S  | P | A | 0.396 | -0.148 | 0.017 | 1.85E-18 |          | 0.999 |
| DQA1 | 53  | R  | P | A | 0.340 | 0.252  | 0.017 | 2.70E-49 |          | 0.996 |
| DQA1 | 53  | K  | P | A | 0.396 | -0.148 | 0.017 | 1.85E-18 | 1.54E-48 | 0.999 |
| DQA1 | 53  | Q  | P | A | 0.264 | -0.117 | 0.019 | 4.13E-10 |          | 0.995 |
| DQA1 | 54  |    | L | F | 0.136 | 0.262  | 0.024 | 6.18E-28 |          | 0.979 |
| DQA1 | 55  |    | G | R | 0.396 | -0.148 | 0.017 | 1.84E-18 |          | 0.998 |
| DQA1 | 56  | G  | P | A | 0.396 | -0.148 | 0.017 | 1.84E-18 |          | 0.998 |
| DQA1 | 56  | R  | P | A | 0.204 | 0.164  | 0.020 | 6.12E-16 |          | 0.980 |
| DQA1 | 61  |    | G | F | 0.396 | -0.148 | 0.017 | 1.85E-18 |          | 0.999 |

|             |            |          |          |          |              |              |              |                 |          |              |
|-------------|------------|----------|----------|----------|--------------|--------------|--------------|-----------------|----------|--------------|
| DQA1        | 64         |          | R        | T        | 0.396        | -0.148       | 0.017        | 1.84E-18        |          | 0.998        |
| DQA1        | 66         |          | M        | I        | 0.396        | -0.148       | 0.017        | 1.85E-18        |          | 0.999        |
| DQA1        | 69         | A        | P        | A        | 0.396        | -0.148       | 0.017        | 1.85E-18        |          | 0.999        |
| DQA1        | 69         | L        | P        | A        | 0.580        | 0.112        | 0.017        | 1.54E-11        | 2.92E-23 | 0.998        |
| DQA1        | 69         | T        | P        | A        | 0.024        | 0.327        | 0.053        | 1.04E-09        |          | 0.996        |
| DQA1        | 75         |          | S        | I        | 0.240        | -0.167       | 0.019        | 4.32E-18        |          | 0.995        |
| DQA1        | 76         | M        | P        | A        | 0.396        | -0.148       | 0.017        | 1.85E-18        |          | 0.998        |
| DQA1        | 76         | V        | P        | A        | 0.204        | 0.164        | 0.020        | 6.12E-16        |          | 0.980        |
| DQA1        | 80         |          | Y        | S        | 0.396        | -0.148       | 0.017        | 1.85E-18        |          | 0.999        |
| DQA1        | 107        | I        | P        | A        | 0.240        | -0.167       | 0.019        | 4.42E-18        |          | 0.995        |
| DQA1        | 107        | T        | P        | A        | 0.758        | 0.166        | 0.019        | 6.60E-18        |          | 0.986        |
| DQA1        | 129        | H        | P        | A        | 0.776        | 0.141        | 0.021        | 2.36E-11        |          | 0.831        |
| DQA1        | 129        | Q        | P        | A        | 0.224        | -0.141       | 0.021        | 2.36E-11        |          | 0.831        |
| DQA1        | 130        | A        | P        | A        | 0.172        | -0.114       | 0.024        | 1.57E-06        |          | 0.818        |
| DQA1        | 130        | S        | P        | A        | 0.829        | 0.114        | 0.024        | 1.66E-06        |          | 0.817        |
| DQA1        | 156        | F        | P        | A        | 0.760        | 0.167        | 0.019        | 4.55E-18        |          | 0.994        |
| DQA1        | 156        | L        | P        | A        | 0.240        | -0.167       | 0.019        | 4.81E-18        |          | 0.994        |
| DQA1        | 161        | D        | P        | A        | 0.760        | 0.167        | 0.019        | 4.75E-18        |          | 0.995        |
| DQA1        | 161        | E        | P        | A        | 0.240        | -0.167       | 0.019        | 4.86E-18        |          | 0.994        |
| DQA1        | 163        | I        | P        | A        | 0.760        | 0.167        | 0.019        | 4.84E-18        |          | 0.994        |
| DQA1        | 163        | S        | P        | A        | 0.240        | -0.167       | 0.019        | 4.85E-18        |          | 0.995        |
| <b>DQA1</b> | <b>175</b> | <b>E</b> | <b>P</b> | <b>A</b> | <b>0.364</b> | <b>0.279</b> | <b>0.017</b> | <b>1.14E-61</b> |          | <b>0.996</b> |
| DQA1        | 175        | QK       | P        | A        | 0.636        | -0.279       | 0.017        | 1.15E-61        |          | 0.996        |
| DQA1        | 175        | Qx       | P        | A        | 0.396        | -0.148       | 0.017        | 1.99E-18        | 8.35E-62 | 0.999        |
| DQA1        | 175        | Q        | P        | A        | 0.396        | -0.148       | 0.017        | 2.03E-18        |          | 0.999        |
| DQA1        | 175        | K        | P        | A        | 0.240        | -0.167       | 0.019        | 4.93E-18        |          | 0.995        |
| DQA1        | 175        | QE       | P        | A        | 0.760        | 0.166        | 0.019        | 6.20E-18        |          | 0.995        |
| DQA1        | 187        | T        | P        | A        | 0.206        | 0.166        | 0.020        | 2.23E-16        |          | 0.971        |
| DQA1        | 187        | A        | P        | A        | 0.795        | -0.165       | 0.020        | 4.95E-16        |          | 0.971        |
| DQA1        | 207        | V        | P        | A        | 0.915        | 0.186        | 0.036        | 2.24E-07        |          | 0.593        |
| DQA1        | 207        | M        | P        | A        | 0.085        | -0.186       | 0.036        | 2.31E-07        |          | 0.593        |
| DQA1        | 215        | L        | P        | A        | 0.339        | 0.251        | 0.017        | 1.28E-48        |          | 0.996        |
| DQA1        | 215        | F        | P        | A        | 0.661        | -0.251       | 0.017        | 1.30E-48        |          | 0.996        |
| DQA1        | 218        | R        | P        | A        | 0.603        | 0.146        | 0.017        | 4.43E-18        |          | 0.999        |
| DQA1        | 218        | Q        | P        | A        | 0.397        | -0.146       | 0.017        | 5.20E-18        |          | 0.999        |
| DQB1        | -4         | V        | P        | A        | 0.607        | 0.144        | 0.017        | 1.27E-17        |          | 0.997        |
| DQB1        | -4         | L        | P        | A        | 0.361        | -0.135       | 0.017        | 6.83E-15        |          | 0.976        |
| DQB1        | -5         | P        | P        | A        | 0.607        | 0.144        | 0.017        | 1.27E-17        |          | 0.996        |
| DQB1        | -5         | Px       | P        | A        | 0.639        | 0.135        | 0.017        | 6.81E-15        | 5.15E-16 | 0.976        |
| DQB1        | -5         | PS       | P        | A        | 0.757        | 0.121        | 0.019        | 1.66E-10        |          | 0.997        |

|      |     |    |   |   |       |        |       |          |          |       |
|------|-----|----|---|---|-------|--------|-------|----------|----------|-------|
| DQB1 | -5  | L  | P | A | 0.211 | -0.114 | 0.020 | 1.70E-08 |          | 0.970 |
| DQB1 | -5  | PL | P | A | 0.819 | 0.107  | 0.022 | 8.85E-07 |          | 0.959 |
| DQB1 | -6  | TA | P | A | 0.607 | 0.145  | 0.017 | 1.25E-17 |          | 0.996 |
| DQB1 | -6  | T  | P | A | 0.605 | 0.142  | 0.017 | 5.73E-17 | 8.03E-17 | 0.988 |
| DQB1 | -6  | S  | P | A | 0.361 | -0.135 | 0.017 | 6.83E-15 |          | 0.976 |
| DQB1 | -6  | Tx | P | A | 0.637 | 0.133  | 0.017 | 2.88E-14 |          | 0.967 |
| DQB1 | -9  | M  | P | A | 0.819 | 0.107  | 0.022 | 9.15E-07 |          | 0.959 |
| DQB1 | -21 | G  | P | A | 0.607 | 0.145  | 0.017 | 1.21E-17 |          | 0.996 |
| DQB1 | -21 | D  | P | A | 0.361 | -0.135 | 0.017 | 6.83E-15 |          | 0.976 |
| DQB1 | -27 | A  | P | A | 0.819 | 0.107  | 0.022 | 8.90E-07 |          | 0.959 |
| DQB1 | 30  | H  | P | A | 0.246 | -0.128 | 0.020 | 1.04E-10 |          | 0.918 |
| DQB1 | 30  | Y  | P | A | 0.500 | 0.078  | 0.017 | 3.60E-06 |          | 0.939 |
| DQB1 | 53  |    | Q | L | 0.395 | -0.148 | 0.017 | 1.73E-18 |          | 0.997 |
| DQB1 | 55  | R  | P | A | 0.417 | -0.108 | 0.017 | 9.17E-11 |          | 0.997 |
| DQB1 | 55  | P  | P | A | 0.329 | 0.103  | 0.017 | 4.07E-09 |          | 0.997 |
| DQB1 | 56  |    | L | P | 0.022 | 0.412  | 0.056 | 1.87E-13 |          | 0.995 |
| DQB1 | 57  | A  | P | A | 0.401 | 0.134  | 0.017 | 3.00E-15 |          | 0.982 |
| DQB1 | 57  | AS | P | A | 0.411 | 0.130  | 0.017 | 1.16E-14 |          | 0.981 |
| DQB1 | 57  | AV | P | A | 0.552 | 0.079  | 0.017 | 2.73E-06 | 4.87E-14 | 0.952 |
| DQB1 | 57  | D  | P | A | 0.438 | -0.078 | 0.017 | 4.74E-06 |          | 0.950 |
| DQB1 | 57  | AD | P | A | 0.839 | 0.103  | 0.023 | 7.29E-06 |          | 0.937 |
| DQB1 | 57  | V  | P | A | 0.151 | -0.104 | 0.024 | 1.01E-05 |          | 0.939 |
| DQB1 | 70  | G  | P | A | 0.358 | -0.135 | 0.017 | 1.40E-14 |          | 0.965 |
| DQB1 | 70  | E  | P | A | 0.024 | 0.367  | 0.054 | 8.95E-12 | 3.16E-22 | 0.989 |
| DQB1 | 70  | R  | P | A | 0.618 | 0.093  | 0.017 | 7.38E-08 |          | 0.966 |
| DQB1 | 71  | D  | P | A | 0.024 | 0.367  | 0.054 | 8.95E-12 |          | 0.989 |
| DQB1 | 84  | Q  | P | A | 0.605 | 0.148  | 0.017 | 1.72E-18 |          | 0.996 |
| DQB1 | 84  | E  | P | A | 0.393 | -0.147 | 0.017 | 2.96E-18 |          | 0.996 |
| DQB1 | 85  | L  | P | A | 0.605 | 0.148  | 0.017 | 1.72E-18 |          | 0.997 |
| DQB1 | 85  | V  | P | A | 0.393 | -0.147 | 0.017 | 2.96E-18 |          | 0.996 |
| DQB1 | 86  | E  | P | A | 0.605 | 0.148  | 0.017 | 1.70E-18 |          | 0.996 |
| DQB1 | 86  | Ex | P | A | 0.607 | 0.147  | 0.017 | 2.96E-18 |          | 0.996 |
| DQB1 | 86  | EG | P | A | 0.637 | 0.139  | 0.017 | 1.38E-15 |          | 0.965 |
| DQB1 | 86  | A  | P | A | 0.361 | -0.138 | 0.017 | 2.33E-15 |          | 0.965 |
| DQB1 | 87  | L  | P | A | 0.605 | 0.148  | 0.017 | 1.70E-18 | 1.19E-17 | 0.997 |
| DQB1 | 87  | Lx | P | A | 0.606 | 0.147  | 0.017 | 2.93E-18 |          | 0.997 |
| DQB1 | 87  | LY | P | A | 0.786 | 0.119  | 0.020 | 4.78E-09 |          | 0.956 |
| DQB1 | 87  | F  | P | A | 0.212 | -0.118 | 0.020 | 7.05E-09 |          | 0.955 |
| DQB1 | 87  | LF | P | A | 0.816 | 0.111  | 0.022 | 3.33E-07 |          | 0.945 |
| DQB1 | 87  | Y  | P | A | 0.182 | -0.110 | 0.022 | 5.06E-07 |          | 0.945 |

|      |     |    |   |   |       |        |       |          |          |       |
|------|-----|----|---|---|-------|--------|-------|----------|----------|-------|
| DQB1 | 89  | T  | P | A | 0.605 | 0.148  | 0.017 | 1.73E-18 |          | 0.997 |
| DQB1 | 89  | G  | P | A | 0.393 | -0.147 | 0.017 | 2.97E-18 |          | 0.996 |
| DQB1 | 90  | T  | P | A | 0.605 | 0.148  | 0.017 | 1.73E-18 |          | 0.997 |
| DQB1 | 90  | I  | P | A | 0.394 | -0.147 | 0.017 | 2.96E-18 |          | 0.997 |
| DQB1 | 125 | A  | P | A | 0.605 | 0.148  | 0.017 | 1.73E-18 |          | 0.998 |
| DQB1 | 125 | Ax | P | A | 0.606 | 0.147  | 0.017 | 2.96E-18 | 1.08E-17 | 0.997 |
| DQB1 | 125 | G  | P | A | 0.244 | -0.125 | 0.019 | 4.94E-11 |          | 0.998 |
| DQB1 | 125 | AS | P | A | 0.752 | 0.124  | 0.019 | 5.13E-11 |          | 0.989 |
| DQB1 | 135 | G  | P | A | 0.100 | 0.272  | 0.027 | 1.27E-23 |          | 0.993 |
| DQB1 | 135 | D  | P | A | 0.898 | -0.263 | 0.027 | 1.09E-22 |          | 0.991 |
| DQB1 | 140 | T  | P | A | 0.350 | 0.138  | 0.017 | 7.93E-16 |          | 0.997 |
| DQB1 | 140 | A  | P | A | 0.648 | -0.137 | 0.017 | 1.52E-15 |          | 0.996 |
| DQB1 | 182 | N  | P | A | 0.350 | 0.138  | 0.017 | 7.86E-16 |          | 0.997 |
| DQB1 | 182 | S  | P | A | 0.648 | -0.137 | 0.017 | 1.49E-15 |          | 0.997 |
| DQB1 | 185 | I  | P | A | 0.172 | 0.261  | 0.021 | 1.39E-33 |          | 0.985 |
| DQB1 | 185 | T  | P | A | 0.826 | -0.257 | 0.021 | 8.05E-33 |          | 0.984 |
| DQB1 | 203 | I  | P | A | 0.606 | 0.144  | 0.017 | 1.77E-17 |          | 0.991 |
| DQB1 | 203 | V  | P | A | 0.391 | -0.144 | 0.017 | 2.05E-17 |          | 0.997 |
| DQB1 | 220 | R  | P | A | 0.394 | -0.147 | 0.017 | 2.89E-18 |          | 0.996 |
| DQB1 | 220 | H  | P | A | 0.603 | 0.147  | 0.017 | 4.64E-18 |          | 0.985 |
| DQB1 | 221 | Q  | P | A | 0.394 | -0.147 | 0.017 | 2.90E-18 |          | 0.995 |
| DQB1 | 221 | H  | P | A | 0.604 | 0.147  | 0.017 | 4.26E-18 |          | 0.986 |
| DRB1 | -1  | x  | P | A | 0.037 | 0.228  | 0.052 | 1.07E-05 |          | 0.684 |
| DRB1 | -16 | V  | P | A | 0.462 | -0.213 | 0.017 | 1.31E-36 |          | 0.944 |
| DRB1 | -16 | A  | P | A | 0.501 | 0.178  | 0.016 | 1.40E-27 | 2.50E-39 | 0.986 |
| DRB1 | -16 | x  | P | A | 0.037 | 0.228  | 0.052 | 1.07E-05 |          | 0.684 |
| DRB1 | -17 | T  | P | A | 0.162 | -0.100 | 0.022 | 9.28E-06 |          | 0.977 |
| DRB1 | -17 | x  | P | A | 0.037 | 0.228  | 0.052 | 1.07E-05 |          | 0.684 |
| DRB1 | -24 | L  | P | A | 0.775 | -0.197 | 0.020 | 8.79E-23 |          | 0.937 |
| DRB1 | -24 | F  | P | A | 0.188 | 0.174  | 0.021 | 5.29E-17 | 4.09E-25 | 0.997 |
| DRB1 | -24 | x  | P | A | 0.037 | 0.228  | 0.052 | 1.07E-05 |          | 0.684 |
| DRB1 | -25 | R  | P | A | 0.462 | -0.213 | 0.017 | 1.31E-36 |          | 0.944 |
| DRB1 | -25 | K  | P | A | 0.501 | 0.178  | 0.016 | 1.40E-27 | 2.50E-39 | 0.986 |
| DRB1 | -25 | x  | P | A | 0.037 | 0.228  | 0.052 | 1.07E-05 |          | 0.684 |
| DRB1 | 4   | Q  | P | A | 0.151 | 0.233  | 0.023 | 6.30E-25 |          | 1.000 |
| DRB1 | 4   | R  | P | A | 0.846 | -0.234 | 0.023 | 7.60E-25 |          | 0.974 |
| DRB1 | 9   | W  | P | A | 0.300 | 0.084  | 0.018 | 2.52E-06 |          | 0.985 |
| DRB1 | 9   | E  | P | A | 0.687 | -0.080 | 0.018 | 5.74E-06 |          | 0.985 |
| DRB1 | 10  | Q  | P | A | 0.501 | 0.178  | 0.016 | 1.34E-27 |          | 0.987 |
| DRB1 | 10  | Y  | P | A | 0.493 | -0.173 | 0.016 | 5.65E-26 |          | 0.987 |

|      |    |     |   |   |       |        |       |          |          |       |
|------|----|-----|---|---|-------|--------|-------|----------|----------|-------|
| DRB1 | 11 | VG  | P | A | 0.332 | 0.251  | 0.017 | 1.59E-48 |          | 0.999 |
| DRB1 | 11 | SPL | P | A | 0.655 | -0.245 | 0.017 | 5.55E-47 |          | 0.999 |
| DRB1 | 11 | SPD | P | A | 0.662 | -0.245 | 0.017 | 3.51E-46 |          | 0.986 |
| DRB1 | 11 | SP  | P | A | 0.650 | -0.239 | 0.017 | 9.87E-45 |          | 0.986 |
| DRB1 | 11 | SLD | P | A | 0.511 | -0.179 | 0.016 | 6.85E-28 |          | 0.999 |
| DRB1 | 11 | G   | P | A | 0.138 | 0.255  | 0.023 | 2.01E-27 |          | 1.000 |
| DRB1 | 11 | SL  | P | A | 0.499 | -0.177 | 0.016 | 2.18E-27 |          | 0.999 |
| DRB1 | 11 | SD  | P | A | 0.506 | -0.174 | 0.016 | 1.90E-26 |          | 0.987 |
| DRB1 | 11 | S   | P | A | 0.493 | -0.173 | 0.016 | 5.65E-26 |          | 0.987 |
| DRB1 | 11 | GD  | P | A | 0.151 | 0.233  | 0.023 | 6.30E-25 |          | 1.000 |
| DRB1 | 11 | GL  | P | A | 0.144 | 0.239  | 0.023 | 8.99E-25 | 8.33E-48 | 0.974 |
| DRB1 | 11 | SPV | P | A | 0.844 | -0.220 | 0.022 | 1.49E-22 |          | 0.975 |
| DRB1 | 11 | V   | P | A | 0.194 | 0.161  | 0.020 | 3.68E-15 |          | 0.999 |
| DRB1 | 11 | VD  | P | A | 0.206 | 0.151  | 0.020 | 3.92E-14 |          | 0.999 |
| DRB1 | 11 | VL  | P | A | 0.200 | 0.150  | 0.020 | 1.45E-13 |          | 0.980 |
| DRB1 | 11 | SPG | P | A | 0.788 | -0.142 | 0.020 | 1.19E-12 |          | 0.981 |
| DRB1 | 11 | PG  | P | A | 0.295 | 0.091  | 0.018 | 3.80E-07 |          | 1.000 |
| DRB1 | 11 | SVL | P | A | 0.693 | -0.087 | 0.018 | 9.52E-07 |          | 1.000 |
| DRB1 | 11 | SVD | P | A | 0.700 | -0.084 | 0.018 | 2.52E-06 |          | 0.985 |
| DRB1 | 11 | SV  | P | A | 0.687 | -0.080 | 0.018 | 5.74E-06 |          | 0.985 |
| DRB1 | 11 | SVG | P | A | 0.826 | 0.097  | 0.022 | 8.35E-06 |          | 0.978 |
| DRB1 | 11 | PL  | P | A | 0.162 | -0.100 | 0.022 | 9.28E-06 |          | 0.977 |
| DRB1 | 12 |     | T | K | 0.493 | -0.173 | 0.016 | 5.65E-26 |          | 0.987 |
| DRB1 | 13 | SRF | P | A | 0.625 | -0.276 | 0.017 | 1.25E-58 |          | 0.952 |
| DRB1 | 13 | SR  | P | A | 0.602 | -0.257 | 0.017 | 6.27E-52 |          | 0.940 |
| DRB1 | 13 | HY  | P | A | 0.327 | 0.259  | 0.017 | 2.74E-51 |          | 0.999 |
| DRB1 | 13 | SRG | P | A | 0.650 | -0.239 | 0.017 | 9.87E-45 |          | 0.986 |
| DRB1 | 13 | SF  | P | A | 0.469 | -0.211 | 0.017 | 1.00E-36 |          | 0.955 |
| DRB1 | 13 | S   | P | A | 0.445 | -0.200 | 0.017 | 7.64E-33 |          | 0.942 |
| DRB1 | 13 | YG  | P | A | 0.186 | 0.247  | 0.021 | 3.01E-30 |          | 0.924 |
| DRB1 | 13 | SFG | P | A | 0.517 | -0.184 | 0.016 | 1.37E-29 |          | 1.000 |
| DRB1 | 13 | Y   | P | A | 0.138 | 0.255  | 0.023 | 2.01E-27 | 4.71E-58 | 1.000 |
| DRB1 | 13 | SG  | P | A | 0.493 | -0.173 | 0.016 | 5.65E-26 |          | 0.987 |
| DRB1 | 13 | SRH | P | A | 0.790 | -0.206 | 0.021 | 2.55E-23 |          | 0.912 |
| DRB1 | 13 | HG  | P | A | 0.237 | 0.182  | 0.020 | 1.97E-20 |          | 0.938 |
| DRB1 | 13 | YF  | P | A | 0.162 | 0.204  | 0.022 | 4.38E-20 |          | 0.976 |
| DRB1 | 13 | H   | P | A | 0.189 | 0.173  | 0.021 | 5.36E-17 |          | 0.999 |
| DRB1 | 13 | SRY | P | A | 0.740 | -0.154 | 0.019 | 6.74E-16 |          | 0.926 |
| DRB1 | 13 | HF  | P | A | 0.212 | 0.142  | 0.020 | 1.19E-12 |          | 0.981 |
| DRB1 | 13 | SHF | P | A | 0.657 | -0.108 | 0.018 | 8.53E-10 |          | 0.950 |

|      |    |     |   |   |       |        |       |          |          |       |
|------|----|-----|---|---|-------|--------|-------|----------|----------|-------|
| DRB1 | 13 | SH  | P | A | 0.634 | -0.091 | 0.017 | 1.68E-07 | 0.938    |       |
| DRB1 | 13 | RY  | P | A | 0.295 | 0.091  | 0.018 | 3.80E-07 | 1.000    |       |
| DRB1 | 13 | SYF | P | A | 0.607 | -0.086 | 0.017 | 5.36E-07 | 0.953    |       |
| DRB1 | 13 | RF  | P | A | 0.180 | -0.105 | 0.022 | 1.26E-06 | 0.978    |       |
| DRB1 | 13 | SY  | P | A | 0.584 | -0.071 | 0.017 | 3.08E-05 | 0.941    |       |
| DRB1 | 13 | SHG | P | A | 0.682 | -0.073 | 0.018 | 3.33E-05 | 0.985    |       |
| DRB1 | 14 |     | K | E | 0.138 | 0.255  | 0.023 | 2.01E-27 | 1.000    |       |
| DRB1 | 25 |     | Q | R | 0.138 | 0.255  | 0.023 | 2.01E-27 | 1.000    |       |
| DRB1 | 26 | F   | P | A | 0.837 | 0.255  | 0.032 | 1.13E-15 | 0.343    |       |
| DRB1 | 26 | L   | P | A | 0.026 | -0.249 | 0.059 | 2.53E-05 | 0.719    |       |
| DRB1 | 28 | E   | P | A | 0.175 | 0.192  | 0.023 | 3.20E-17 | 0.876    |       |
| DRB1 | 28 | D   | P | A | 0.812 | -0.177 | 0.022 | 9.15E-16 | 0.882    |       |
| DRB1 | 30 | L   | P | A | 0.138 | 0.255  | 0.023 | 2.01E-27 | 1.000    |       |
| DRB1 | 30 | LG  | P | A | 0.151 | 0.233  | 0.023 | 6.30E-25 | 1.000    |       |
| DRB1 | 30 | LC  | P | A | 0.144 | 0.239  | 0.023 | 8.99E-25 | 0.974    |       |
| DRB1 | 30 | LR  | P | A | 0.144 | 0.236  | 0.023 | 1.97E-24 | 0.999    |       |
| DRB1 | 30 | YHR | P | A | 0.844 | -0.220 | 0.022 | 1.49E-22 | 0.975    |       |
| DRB1 | 30 | LH  | P | A | 0.161 | 0.225  | 0.023 | 1.67E-22 | 0.910    |       |
| DRB1 | 30 | YCH | P | A | 0.844 | -0.217 | 0.022 | 2.93E-22 | 1.000    |       |
| DRB1 | 30 | YHG | P | A | 0.850 | -0.221 | 0.023 | 5.14E-22 | 0.974    |       |
| DRB1 | 30 | YCR | P | A | 0.826 | -0.208 | 0.022 | 1.48E-20 | 0.916    |       |
| DRB1 | 30 | YGR | P | A | 0.833 | -0.212 | 0.023 | 3.04E-20 | 8.34E-23 | 0.890 |
| DRB1 | 30 | YH  | P | A | 0.838 | -0.204 | 0.022 | 4.38E-20 | 0.976    |       |
| DRB1 | 30 | YCG | P | A | 0.833 | -0.208 | 0.023 | 5.98E-20 | 0.913    |       |
| DRB1 | 30 | YR  | P | A | 0.821 | -0.195 | 0.022 | 1.64E-18 | 0.896    |       |
| DRB1 | 30 | YC  | P | A | 0.821 | -0.192 | 0.022 | 2.94E-18 | 0.918    |       |
| DRB1 | 30 | YG  | P | A | 0.827 | -0.195 | 0.023 | 6.89E-18 | 0.893    |       |
| DRB1 | 30 | Y   | P | A | 0.815 | -0.180 | 0.022 | 2.18E-16 | 0.898    |       |
| DRB1 | 30 | YLG | P | A | 0.966 | 0.280  | 0.059 | 2.16E-06 | 0.548    |       |
| DRB1 | 30 | CH  | P | A | 0.029 | -0.286 | 0.069 | 3.45E-05 | 0.462    |       |
| DRB1 | 30 | YL  | P | A | 0.954 | 0.192  | 0.047 | 4.46E-05 | 0.661    |       |
| DRB1 | 32 |     | H | Y | 0.392 | -0.247 | 0.019 | 3.18E-37 | 0.734    |       |
| DRB1 | 33 |     | H | N | 0.189 | 0.173  | 0.021 | 5.33E-17 | 0.999    |       |
| DRB1 | 37 | YF  | P | A | 0.455 | 0.291  | 0.019 | 1.64E-53 | 0.703    |       |
| DRB1 | 37 | NS  | P | A | 0.530 | -0.280 | 0.019 | 1.39E-49 | 0.695    |       |
| DRB1 | 37 | NL  | P | A | 0.376 | -0.242 | 0.020 | 6.88E-34 | 0.675    |       |
| DRB1 | 37 | N   | P | A | 0.361 | -0.235 | 0.020 | 1.93E-31 | 4.19E-57 | 0.664 |
| DRB1 | 37 | F   | P | A | 0.155 | 0.238  | 0.023 | 4.56E-24 | 0.898    |       |
| DRB1 | 37 | FL  | P | A | 0.170 | 0.208  | 0.023 | 7.82E-20 | 0.885    |       |
| DRB1 | 37 | Y   | P | A | 0.301 | 0.165  | 0.021 | 3.69E-15 | 0.681    |       |

|      |    |    |   |   |       |        |       |          |       |
|------|----|----|---|---|-------|--------|-------|----------|-------|
| DRB1 | 37 | YL | P | A | 0.316 | 0.149  | 0.021 | 8.33E-13 | 0.674 |
| DRB1 | 37 | SL | P | A | 0.184 | -0.112 | 0.022 | 4.65E-07 | 0.911 |
| DRB1 | 37 | S  | P | A | 0.169 | -0.102 | 0.023 | 7.38E-06 | 0.934 |
| DRB1 | 37 | SF | P | A | 0.323 | 0.077  | 0.018 | 2.36E-05 | 0.898 |
| DRB1 | 47 |    | F | Y | 0.545 | -0.290 | 0.018 | 1.10E-54 | 0.750 |
| DRB1 | 57 | DA | P | A | 0.781 | -0.257 | 0.021 | 1.34E-32 | 0.821 |
| DRB1 | 57 | D  | P | A | 0.766 | -0.242 | 0.021 | 3.15E-29 | 0.774 |
| DRB1 | 57 | V  | P | A | 0.166 | 0.209  | 0.022 | 4.73E-21 | 0.969 |
| DRB1 | 57 | DS | P | A | 0.819 | -0.192 | 0.022 | 3.41E-18 | 0.895 |
| DRB1 | 57 | S  | P | A | 0.053 | 0.318  | 0.051 | 3.51E-10 | 0.481 |
| DRB1 | 57 | DV | P | A | 0.931 | -0.216 | 0.048 | 7.28E-06 | 0.407 |
| DRB1 | 60 | S  | P | A | 0.166 | 0.209  | 0.022 | 4.73E-21 | 0.969 |
| DRB1 | 60 | Y  | P | A | 0.819 | -0.192 | 0.022 | 3.41E-18 | 0.895 |
| DRB1 | 71 | R  | P | A | 0.392 | 0.297  | 0.025 | 1.11E-31 | 0.351 |
| DRB1 | 71 | KR | P | A | 0.632 | 0.256  | 0.022 | 1.92E-30 | 0.478 |
| DRB1 | 71 | E  | P | A | 0.241 | -0.238 | 0.025 | 7.50E-21 | 0.445 |
| DRB1 | 71 | KE | P | A | 0.481 | -0.152 | 0.022 | 4.03E-12 | 0.480 |
| DRB1 | 73 |    | G | A | 0.259 | 0.151  | 0.023 | 5.00E-11 | 0.542 |
| DRB1 | 74 | QL | P | A | 0.164 | 0.279  | 0.022 | 1.24E-36 | 0.988 |
| DRB1 | 74 | RA | P | A | 0.794 | -0.268 | 0.022 | 9.57E-35 | 0.835 |
| DRB1 | 74 | Q  | P | A | 0.138 | 0.255  | 0.023 | 2.01E-27 | 1.000 |
| DRB1 | 74 | QE | P | A | 0.180 | 0.240  | 0.023 | 1.65E-25 | 0.825 |
| DRB1 | 74 | AE | P | A | 0.715 | -0.194 | 0.022 | 2.00E-18 | 0.558 |
| DRB1 | 74 | A  | P | A | 0.674 | -0.182 | 0.022 | 4.98E-17 | 0.554 |
| DRB1 | 74 | RQ | P | A | 0.259 | 0.151  | 0.023 | 5.00E-11 | 0.542 |
| DRB1 | 74 | RE | P | A | 0.162 | -0.211 | 0.034 | 5.16E-10 | 0.321 |
| DRB1 | 74 | AL | P | A | 0.700 | -0.139 | 0.022 | 5.55E-10 | 0.540 |
| DRB1 | 74 | L  | P | A | 0.026 | 0.304  | 0.053 | 9.28E-09 | 0.938 |
| DRB1 | 74 | LE | P | A | 0.068 | 0.175  | 0.042 | 2.88E-05 | 0.573 |
| DRB1 | 78 |    | V | Y | 0.151 | 0.233  | 0.023 | 6.30E-25 | 1.000 |
| DRB1 | 86 |    | V | G | 0.477 | -0.329 | 0.025 | 2.49E-40 | 0.364 |
| DRB1 | 96 | Y  | P | A | 0.188 | 0.173  | 0.021 | 6.80E-17 | 0.997 |
| DRB1 | 96 | Yx | P | A | 0.201 | 0.173  | 0.021 | 1.67E-16 | 0.923 |
| DRB1 | 96 | YE | P | A | 0.213 | 0.160  | 0.021 | 7.24E-15 | 0.880 |
| DRB1 | 96 | HQ | P | A | 0.774 | -0.157 | 0.021 | 3.13E-14 | 0.822 |
| DRB1 | 96 | HY | P | A | 0.801 | 0.118  | 0.023 | 1.82E-07 | 0.796 |
| DRB1 | 96 | QE | P | A | 0.186 | -0.112 | 0.023 | 6.15E-07 | 0.864 |
| DRB1 | 96 | Qx | P | A | 0.175 | -0.105 | 0.023 | 3.13E-06 | 0.910 |
| DRB1 | 96 | Q  | P | A | 0.162 | -0.098 | 0.022 | 1.17E-05 | 0.999 |
| DRB1 | 98 | K  | P | A | 0.648 | -0.258 | 0.017 | 5.79E-50 | 0.946 |

|      |     |   |   |   |       |        |       |          |          |       |
|------|-----|---|---|---|-------|--------|-------|----------|----------|-------|
| DRB1 | 98  | E | P | A | 0.339 | 0.252  | 0.017 | 1.75E-49 |          | 0.998 |
| DRB1 | 104 | S | P | A | 0.638 | -0.261 | 0.017 | 4.45E-50 |          | 0.906 |
| DRB1 | 104 | A | P | A | 0.339 | 0.252  | 0.017 | 1.75E-49 |          | 0.998 |
| DRB1 | 120 | N | P | A | 0.194 | 0.161  | 0.020 | 4.61E-15 |          | 0.997 |
| DRB1 | 120 | S | P | A | 0.781 | -0.158 | 0.021 | 3.67E-14 |          | 0.858 |
| DRB1 | 133 | R | P | A | 0.818 | 0.104  | 0.023 | 6.34E-06 |          | 0.834 |
| DRB1 | 140 | A | P | A | 0.331 | 0.083  | 0.018 | 4.87E-06 |          | 0.907 |
| DRB1 | 140 | T | P | A | 0.643 | -0.078 | 0.018 | 2.08E-05 |          | 0.815 |
| DRB1 | 142 | V | P | A | 0.818 | 0.104  | 0.023 | 6.34E-06 |          | 0.834 |
| DRB1 | 149 | H | P | A | 0.449 | -0.188 | 0.017 | 5.18E-27 |          | 0.837 |
| DRB1 | 149 | Q | P | A | 0.525 | 0.181  | 0.017 | 6.38E-27 |          | 0.919 |
| DRB1 | 180 | V | P | A | 0.752 | -0.202 | 0.021 | 1.55E-22 |          | 0.780 |
| DRB1 | 180 | L | P | A | 0.196 | 0.173  | 0.021 | 9.86E-17 | 3.22E-24 | 0.951 |
| DRB1 | 180 | x | P | A | 0.044 | 0.299  | 0.061 | 1.08E-06 |          | 0.320 |
| DRB1 | 181 | T | P | A | 0.789 | -0.243 | 0.022 | 1.22E-28 |          | 0.766 |
| DRB1 | 181 | M | P | A | 0.163 | 0.217  | 0.022 | 5.26E-22 | 1.85E-33 | 0.949 |
| DRB1 | 181 | x | P | A | 0.044 | 0.298  | 0.061 | 1.14E-06 |          | 0.318 |
| DRB1 | 189 | x | P | A | 0.043 | 0.219  | 0.052 | 2.33E-05 |          | 0.570 |
| DRB1 | 231 | x | P | A | 0.039 | 0.222  | 0.052 | 1.98E-05 |          | 0.634 |
| DRB1 | 233 | R | P | A | 0.335 | -0.208 | 0.018 | 1.15E-31 |          | 0.954 |
| DRB1 | 233 | T | P | A | 0.626 | 0.168  | 0.017 | 9.40E-23 | 5.76E-34 | 0.985 |
| DRB1 | 233 | x | P | A | 0.039 | 0.222  | 0.052 | 1.98E-05 |          | 0.634 |



**Table S19:** Associations for HLA amino acid (AA) sequence substitutions that were significantly associated ( $P < 4.6 \times 10^{-5}$ ) with seroreactivity to HSV1. At each position that contained a significantly associated allele and >2 possible substitutions, we tested all common (frequency  $\geq 0.01$ ) haplotypes at that position using the omnibus test ( $P_{\text{omni}}$ ) in the conditional haplotype module of PLINK 1.07. Variants and haplotypes with the lowest p-value are indicated in bold and shaded.

| Gene | AA position | AA | A1 | A2 | FRQ   | BETA   | SE    | P        | $P_{\text{omni}}$ | INFO  |
|------|-------------|----|----|----|-------|--------|-------|----------|-------------------|-------|
| DQA1 | -16         | L  | P  | A  | 0.420 | -0.097 | 0.019 | 3.77E-07 |                   | 0.999 |
| DQA1 | -16         | M  | P  | A  | 0.580 | 0.097  | 0.019 | 4.02E-07 |                   | 0.998 |
| DQA1 | 11          | Y  | P  | A  | 0.604 | 0.101  | 0.019 | 1.57E-07 |                   | 0.999 |
| DQA1 | 11          | C  | P  | A  | 0.396 | -0.101 | 0.019 | 1.57E-07 |                   | 0.999 |
| DQA1 | 18          |    | F  | S  | 0.396 | -0.101 | 0.019 | 1.57E-07 |                   | 0.999 |
| DQA1 | 41          |    | K  | R  | 0.171 | -0.120 | 0.027 | 7.52E-06 |                   | 0.816 |
| DQA1 | 45          |    | A  | V  | 0.396 | -0.101 | 0.019 | 1.58E-07 |                   | 0.999 |
| DQA1 | 47          | R  | P  | A  | 0.395 | -0.101 | 0.019 | 1.60E-07 |                   | 0.997 |
| DQA1 | 47          | RK | P  | A  | 0.531 | -0.090 | 0.019 | 1.91E-06 |                   | 0.988 |
| DQA1 | 48          |    | W  | L  | 0.396 | -0.101 | 0.019 | 1.57E-07 |                   | 0.999 |
| DQA1 | 50          | E  | P  | A  | 0.396 | -0.101 | 0.019 | 1.59E-07 |                   | 0.998 |
| DQA1 | 52          | S  | P  | A  | 0.396 | -0.101 | 0.019 | 1.58E-07 |                   | 0.999 |
| DQA1 | 52          | R  | P  | A  | 0.468 | 0.090  | 0.019 | 1.88E-06 |                   | 0.989 |
| DQA1 | 53          | K  | P  | A  | 0.396 | -0.101 | 0.019 | 1.57E-07 |                   | 0.999 |
| DQA1 | 55          |    | G  | R  | 0.396 | -0.101 | 0.019 | 1.59E-07 |                   | 0.998 |
| DQA1 | 56          | G  | P  | A  | 0.396 | -0.101 | 0.019 | 1.59E-07 |                   | 0.998 |
| DQA1 | 61          |    | G  | F  | 0.396 | -0.101 | 0.019 | 1.57E-07 |                   | 0.999 |
| DQA1 | 64          |    | R  | T  | 0.396 | -0.101 | 0.019 | 1.59E-07 |                   | 0.998 |
| DQA1 | 66          |    | M  | I  | 0.396 | -0.101 | 0.019 | 1.57E-07 |                   | 0.999 |
| DQA1 | 69          | A  | P  | A  | 0.396 | -0.101 | 0.019 | 1.57E-07 |                   | 0.999 |
| DQA1 | 69          | L  | P  | A  | 0.580 | 0.097  | 0.019 | 3.82E-07 |                   | 0.998 |
| DQA1 | 76          | M  | P  | A  | 0.396 | -0.101 | 0.019 | 1.58E-07 |                   | 0.998 |
| DQA1 | 80          |    | Y  | S  | 0.396 | -0.101 | 0.019 | 1.57E-07 |                   | 0.999 |
| DQA1 | 130         | A  | P  | A  | 0.172 | -0.120 | 0.027 | 7.46E-06 |                   | 0.818 |
| DQA1 | 130         | S  | P  | A  | 0.829 | 0.120  | 0.027 | 8.26E-06 |                   | 0.817 |
| DQA1 | 175         | Qx | P  | A  | 0.396 | -0.101 | 0.019 | 1.77E-07 |                   | 0.999 |
| DQA1 | 175         | Q  | P  | A  | 0.396 | -0.101 | 0.019 | 1.77E-07 |                   | 0.999 |
| DQA1 | 218         | R  | P  | A  | 0.603 | 0.100  | 0.019 | 2.09E-07 |                   | 0.999 |
| DQA1 | 218         | Q  | P  | A  | 0.397 | -0.100 | 0.019 | 2.34E-07 |                   | 0.999 |
| DQB1 | -4          | V  | P  | A  | 0.607 | 0.098  | 0.019 | 4.43E-07 |                   | 0.997 |
| DQB1 | -4          | L  | P  | A  | 0.361 | -0.086 | 0.020 | 1.45E-05 |                   | 0.976 |
| DQB1 | -5          | P  | P  | A  | 0.607 | 0.098  | 0.019 | 4.42E-07 | 1.51E-06          | 0.996 |
| DQB1 | -5          | PS | P  | A  | 0.757 | 0.109  | 0.022 | 4.46E-07 |                   | 0.997 |

|             |           |          |          |          |              |              |              |                 |          |              |
|-------------|-----------|----------|----------|----------|--------------|--------------|--------------|-----------------|----------|--------------|
| DQB1        | -5        | L        | P        | A        | 0.211        | -0.100       | 0.023        | 1.17E-05        |          | 0.970        |
| DQB1        | -5        | Px       | P        | A        | 0.639        | 0.086        | 0.020        | 1.45E-05        |          | 0.976        |
| DQB1        | -6        | T        | P        | A        | 0.605        | 0.098        | 0.019        | 4.19E-07        |          | 0.988        |
| DQB1        | -6        | TA       | P        | A        | 0.607        | 0.098        | 0.019        | 4.44E-07        | 1.80E-06 | 0.996        |
| DQB1        | -6        | Tx       | P        | A        | 0.637        | 0.087        | 0.020        | 1.41E-05        |          | 0.967        |
| DQB1        | -6        | S        | P        | A        | 0.361        | -0.086       | 0.020        | 1.45E-05        |          | 0.976        |
| DQB1        | -10       | S        | P        | A        | 0.254        | 0.112        | 0.022        | 2.31E-07        |          | 0.999        |
| DQB1        | -10       | A        | P        | A        | 0.714        | -0.087       | 0.021        | 3.60E-05        |          | 0.974        |
| DQB1        | -21       | G        | P        | A        | 0.607        | 0.098        | 0.019        | 4.43E-07        |          | 0.996        |
| DQB1        | -21       | D        | P        | A        | 0.361        | -0.086       | 0.020        | 1.45E-05        |          | 0.976        |
| DQB1        | 9         | Y        | P        | A        | 0.833        | 0.107        | 0.026        | 3.57E-05        | 4.70E-05 | 0.913        |
| DQB1        | 9         | Yx       | P        | A        | 0.833        | 0.107        | 0.026        | 3.57E-05        |          | 0.913        |
| DQB1        | 28        |          | S        | T        | 0.254        | 0.112        | 0.022        | 2.30E-07        |          | 1.000        |
| DQB1        | 30        | S        | P        | A        | 0.254        | 0.112        | 0.022        | 2.30E-07        |          | 1.000        |
| DQB1        | 37        | I        | P        | A        | 0.254        | 0.112        | 0.022        | 2.30E-07        |          | 1.000        |
| DQB1        | 37        | Y        | P        | A        | 0.743        | -0.106       | 0.021        | 8.49E-07        |          | 0.999        |
| DQB1        | 46        |          | E        | V        | 0.254        | 0.112        | 0.022        | 2.30E-07        |          | 0.999        |
| DQB1        | 47        |          | F        | Y        | 0.254        | 0.112        | 0.022        | 2.30E-07        |          | 0.999        |
| DQB1        | 52        |          | L        | P        | 0.254        | 0.112        | 0.022        | 2.30E-07        |          | 0.999        |
| DQB1        | 53        |          | Q        | L        | 0.395        | -0.101       | 0.019        | 1.72E-07        |          | 0.997        |
| DQB1        | 55        | L        | P        | A        | 0.254        | 0.112        | 0.022        | 2.30E-07        |          | 0.999        |
| DQB1        | 55        | R        | P        | A        | 0.417        | -0.098       | 0.019        | 2.93E-07        |          | 0.997        |
| <b>DQB1</b> | <b>57</b> | <b>A</b> | <b>P</b> | <b>A</b> | <b>0.401</b> | <b>0.123</b> | <b>0.019</b> | <b>2.20E-10</b> |          | <b>0.982</b> |
| DQB1        | 57        | AS       | P        | A        | 0.411        | 0.116        | 0.019        | 1.59E-09        | 6.50E-09 | 0.981        |
| DQB1        | 57        | AV       | P        | A        | 0.552        | 0.111        | 0.019        | 8.88E-09        |          | 0.952        |
| DQB1        | 57        | D        | P        | A        | 0.438        | -0.106       | 0.019        | 4.17E-08        |          | 0.950        |
| DQB1        | 66        |          | D        | E        | 0.281        | 0.096        | 0.021        | 4.46E-06        |          | 0.998        |
| DQB1        | 67        |          | I        | V        | 0.281        | 0.096        | 0.021        | 4.47E-06        |          | 0.998        |
| DQB1        | 70        | R        | P        | A        | 0.618        | 0.089        | 0.020        | 7.21E-06        |          | 0.966        |
| DQB1        | 70        | G        | P        | A        | 0.358        | -0.087       | 0.020        | 1.35E-05        |          | 0.965        |
| DQB1        | 71        | K        | P        | A        | 0.254        | 0.112        | 0.022        | 2.30E-07        | 7.06E-06 | 0.999        |
| DQB1        | 71        | KD       | P        | A        | 0.278        | 0.101        | 0.021        | 1.38E-06        |          | 0.998        |
| DQB1        | 74        | A        | P        | A        | 0.254        | 0.112        | 0.022        | 2.30E-07        |          | 0.999        |
| DQB1        | 84        | Q        | P        | A        | 0.605        | 0.101        | 0.019        | 1.72E-07        |          | 0.996        |
| DQB1        | 84        | E        | P        | A        | 0.393        | -0.097       | 0.019        | 6.22E-07        |          | 0.996        |
| DQB1        | 85        | L        | P        | A        | 0.605        | 0.101        | 0.019        | 1.73E-07        |          | 0.997        |
| DQB1        | 85        | V        | P        | A        | 0.393        | -0.097       | 0.019        | 6.22E-07        |          | 0.996        |
| DQB1        | 86        | E        | P        | A        | 0.605        | 0.101        | 0.019        | 1.73E-07        |          | 0.996        |
| DQB1        | 86        | Ex       | P        | A        | 0.607        | 0.097        | 0.019        | 6.21E-07        | 1.30E-06 | 0.996        |
| DQB1        | 86        | EG       | P        | A        | 0.637        | 0.096        | 0.020        | 1.63E-06        |          | 0.965        |

|      |     |     |   |   |       |        |       |          |          |       |
|------|-----|-----|---|---|-------|--------|-------|----------|----------|-------|
| DQB1 | 86  | A   | P | A | 0.361 | -0.091 | 0.020 | 5.53E-06 |          | 0.965 |
| DQB1 | 87  | L   | P | A | 0.605 | 0.101  | 0.019 | 1.72E-07 |          | 0.997 |
| DQB1 | 87  | Lx  | P | A | 0.606 | 0.097  | 0.019 | 6.21E-07 | 2.90E-07 | 0.997 |
| DQB1 | 87  | LY  | P | A | 0.786 | 0.112  | 0.023 | 1.01E-06 |          | 0.956 |
| DQB1 | 87  | F   | P | A | 0.212 | -0.106 | 0.023 | 3.83E-06 |          | 0.955 |
| DQB1 | 89  | T   | P | A | 0.605 | 0.101  | 0.019 | 1.72E-07 |          | 0.997 |
| DQB1 | 89  | G   | P | A | 0.393 | -0.097 | 0.019 | 6.21E-07 |          | 0.996 |
| DQB1 | 90  | T   | P | A | 0.605 | 0.101  | 0.019 | 1.72E-07 |          | 0.997 |
| DQB1 | 90  | I   | P | A | 0.394 | -0.097 | 0.019 | 6.19E-07 |          | 0.997 |
| DQB1 | 125 | AS  | P | A | 0.752 | 0.113  | 0.021 | 1.59E-07 |          | 0.989 |
| DQB1 | 125 | A   | P | A | 0.605 | 0.101  | 0.019 | 1.71E-07 | 1.54E-07 | 0.998 |
| DQB1 | 125 | Ax  | P | A | 0.606 | 0.097  | 0.019 | 6.16E-07 |          | 0.997 |
| DQB1 | 125 | G   | P | A | 0.244 | -0.107 | 0.022 | 6.50E-07 |          | 0.998 |
| DQB1 | 203 | I   | P | A | 0.606 | 0.098  | 0.019 | 4.21E-07 |          | 0.991 |
| DQB1 | 203 | V   | P | A | 0.391 | -0.093 | 0.019 | 1.60E-06 |          | 0.997 |
| DQB1 | 220 | H   | P | A | 0.603 | 0.099  | 0.019 | 3.14E-07 |          | 0.985 |
| DQB1 | 220 | R   | P | A | 0.394 | -0.097 | 0.019 | 5.62E-07 |          | 0.996 |
| DQB1 | 221 | H   | P | A | 0.604 | 0.099  | 0.019 | 3.83E-07 |          | 0.986 |
| DQB1 | 221 | Q   | P | A | 0.394 | -0.097 | 0.019 | 5.24E-07 |          | 0.995 |
| DRB1 | -1  | S   | P | A | 0.149 | -0.115 | 0.026 | 1.15E-05 |          | 0.994 |
| DRB1 | -17 | T   | P | A | 0.162 | -0.118 | 0.026 | 4.53E-06 |          | 0.977 |
| DRB1 | -17 | A   | P | A | 0.801 | 0.101  | 0.024 | 3.91E-05 |          | 0.911 |
| DRB1 | 11  | PL  | P | A | 0.162 | -0.118 | 0.026 | 4.53E-06 |          | 0.977 |
| DRB1 | 11  | P   | P | A | 0.156 | -0.114 | 0.026 | 1.00E-05 | 6.31E-04 | 1.000 |
| DRB1 | 11  | SVG | P | A | 0.826 | 0.105  | 0.025 | 2.59E-05 |          | 0.978 |
| DRB1 | 13  | RG  | P | A | 0.204 | -0.113 | 0.024 | 2.05E-06 |          | 0.932 |
| DRB1 | 13  | SHY | P | A | 0.772 | 0.103  | 0.023 | 7.69E-06 | 5.68E-04 | 0.919 |
| DRB1 | 13  | R   | P | A | 0.156 | -0.114 | 0.026 | 1.00E-05 |          | 1.000 |
| DRB1 | 13  | RF  | P | A | 0.180 | -0.101 | 0.025 | 4.14E-05 |          | 0.978 |
| DRB1 | 37  | SL  | P | A | 0.184 | -0.130 | 0.025 | 2.79E-07 |          | 0.911 |
| DRB1 | 37  | S   | P | A | 0.169 | -0.118 | 0.026 | 4.82E-06 | 1.13E-04 | 0.934 |
| DRB1 | 71  | A   | P | A | 0.127 | -0.140 | 0.032 | 9.94E-06 |          | 0.785 |
| DRB1 | 96  | QE  | P | A | 0.186 | -0.115 | 0.026 | 7.48E-06 |          | 0.864 |
| DRB1 | 96  | HY  | P | A | 0.801 | 0.115  | 0.026 | 7.85E-06 | 1.51E-04 | 0.796 |
| DRB1 | 96  | Qx  | P | A | 0.175 | -0.112 | 0.026 | 1.44E-05 |          | 0.910 |
| DRB1 | 96  | Q   | P | A | 0.162 | -0.109 | 0.025 | 1.70E-05 |          | 0.999 |
| DRB1 | 133 | R   | P | A | 0.818 | 0.117  | 0.026 | 7.98E-06 |          | 0.834 |
| DRB1 | 133 | L   | P | A | 0.156 | -0.114 | 0.026 | 9.84E-06 |          | 0.999 |
| DRB1 | 142 | V   | P | A | 0.818 | 0.117  | 0.026 | 7.98E-06 |          | 0.834 |
| DRB1 | 142 | M   | P | A | 0.156 | -0.114 | 0.026 | 9.84E-06 |          | 0.999 |

**Table S20:** Associations for HLA amino acid (AA) sequence substitutions that were significantly associated ( $P < 4.6 \times 10^{-5}$ ) with seroreactivity to JCV. At each position that contained a significantly associated allele and >2 possible substitutions, we tested all common (frequency  $\geq 0.01$ ) haplotypes at that position using the omnibus test ( $P_{\text{omni}}$ ) in the conditional haplotype module of PLINK 1.07. Variants and haplotypes with the lowest p-value are indicated in bold and shaded.

| Gene | AA position | AA | A1 | A2 | FRQ   | BETA   | SE    | P        | $P_{\text{omni}}$ | INFO  |
|------|-------------|----|----|----|-------|--------|-------|----------|-------------------|-------|
| DQA1 | -16         | M  | P  | A  | 0.580 | 0.130  | 0.021 | 1.09E-09 |                   | 0.998 |
| DQA1 | -16         | L  | P  | A  | 0.420 | -0.129 | 0.021 | 1.42E-09 |                   | 0.999 |
| DQA1 | 11          | C  | P  | A  | 0.396 | -0.134 | 0.022 | 6.73E-10 |                   | 0.999 |
| DQA1 | 11          | Y  | P  | A  | 0.604 | 0.134  | 0.022 | 6.73E-10 |                   | 0.999 |
| DQA1 | 18          |    | F  | S  | 0.396 | -0.134 | 0.022 | 6.72E-10 |                   | 0.999 |
| DQA1 | 41          |    | K  | R  | 0.171 | -0.181 | 0.031 | 6.86E-09 |                   | 0.816 |
| DQA1 | 45          |    | A  | V  | 0.396 | -0.134 | 0.022 | 6.78E-10 |                   | 0.999 |
| DQA1 | 47          | R  | P  | A  | 0.395 | -0.134 | 0.022 | 6.96E-10 |                   | 0.997 |
| DQA1 | 47          | RK | P  | A  | 0.531 | -0.111 | 0.021 | 2.28E-07 | 5.78E-09          | 0.988 |
| DQA1 | 47          | RC | P  | A  | 0.660 | -0.089 | 0.021 | 3.73E-05 |                   | 0.996 |
| DQA1 | 48          |    | W  | L  | 0.396 | -0.134 | 0.022 | 6.71E-10 |                   | 0.999 |
| DQA1 | 50          | E  | P  | A  | 0.396 | -0.134 | 0.022 | 6.86E-10 |                   | 0.998 |
| DQA1 | 50          | L  | P  | A  | 0.340 | 0.089  | 0.021 | 3.73E-05 |                   | 0.996 |
| DQA1 | 52          | S  | P  | A  | 0.396 | -0.134 | 0.022 | 6.80E-10 |                   | 0.999 |
| DQA1 | 52          | R  | P  | A  | 0.468 | 0.111  | 0.021 | 2.22E-07 |                   | 0.989 |
| DQA1 | 53          | K  | P  | A  | 0.396 | -0.134 | 0.022 | 6.70E-10 |                   | 0.999 |
| DQA1 | 53          | R  | P  | A  | 0.340 | 0.089  | 0.021 | 3.73E-05 |                   | 0.996 |
| DQA1 | 55          |    | G  | R  | 0.396 | -0.134 | 0.022 | 6.85E-10 |                   | 0.998 |
| DQA1 | 56          | G  | P  | A  | 0.396 | -0.134 | 0.022 | 6.85E-10 |                   | 0.998 |
| DQA1 | 61          |    | G  | F  | 0.396 | -0.134 | 0.022 | 6.70E-10 |                   | 0.999 |
| DQA1 | 64          |    | R  | T  | 0.396 | -0.134 | 0.022 | 6.86E-10 |                   | 0.998 |
| DQA1 | 66          |    | M  | I  | 0.396 | -0.134 | 0.022 | 6.70E-10 |                   | 0.999 |
| DQA1 | 69          | A  | P  | A  | 0.396 | -0.134 | 0.022 | 6.70E-10 |                   | 0.999 |
| DQA1 | 69          | L  | P  | A  | 0.580 | 0.129  | 0.021 | 1.35E-09 |                   | 0.998 |
| DQA1 | 76          | M  | P  | A  | 0.396 | -0.134 | 0.022 | 6.77E-10 |                   | 0.998 |
| DQA1 | 80          |    | Y  | S  | 0.396 | -0.134 | 0.022 | 6.70E-10 |                   | 0.999 |
| DQA1 | 130         | A  | P  | A  | 0.172 | -0.181 | 0.031 | 6.86E-09 |                   | 0.818 |
| DQA1 | 130         | S  | P  | A  | 0.829 | 0.181  | 0.031 | 6.88E-09 |                   | 0.817 |
| DQA1 | 175         | Qx | P  | A  | 0.396 | -0.134 | 0.022 | 6.53E-10 |                   | 0.999 |
| DQA1 | 175         | Q  | P  | A  | 0.396 | -0.134 | 0.022 | 6.54E-10 | 3.70E-09          | 0.999 |
| DQA1 | 175         | QK | P  | A  | 0.636 | -0.088 | 0.021 | 3.89E-05 |                   | 0.996 |
| DQA1 | 175         | E  | P  | A  | 0.364 | 0.088  | 0.021 | 3.89E-05 |                   | 0.996 |
| DQA1 | 218         | R  | P  | A  | 0.603 | 0.133  | 0.022 | 1.01E-09 |                   | 0.999 |

|      |     |    |   |   |       |        |       |          |          |       |
|------|-----|----|---|---|-------|--------|-------|----------|----------|-------|
| DQA1 | 218 | Q  | P | A | 0.397 | -0.133 | 0.022 | 1.03E-09 |          | 0.999 |
| DQB1 | -4  | L  | P | A | 0.361 | -0.142 | 0.022 | 2.95E-10 |          | 0.976 |
| DQB1 | -4  | V  | P | A | 0.607 | 0.129  | 0.022 | 2.82E-09 |          | 0.997 |
| DQB1 | -5  | Px | P | A | 0.639 | 0.142  | 0.022 | 2.95E-10 |          | 0.976 |
| DQB1 | -5  | L  | P | A | 0.211 | -0.162 | 0.027 | 1.84E-09 | 4.09E-10 | 0.97  |
| DQB1 | -5  | P  | P | A | 0.607 | 0.129  | 0.022 | 2.83E-09 |          | 0.996 |
| DQB1 | -5  | PS | P | A | 0.757 | 0.135  | 0.025 | 6.41E-08 |          | 0.997 |
| DQB1 | -6  | Tx | P | A | 0.637 | 0.143  | 0.023 | 2.64E-10 |          | 0.967 |
| DQB1 | -6  | S  | P | A | 0.361 | -0.142 | 0.022 | 2.95E-10 | 1.43E-09 | 0.976 |
| DQB1 | -6  | T  | P | A | 0.605 | 0.130  | 0.022 | 2.57E-09 |          | 0.988 |
| DQB1 | -6  | TA | P | A | 0.607 | 0.129  | 0.022 | 2.83E-09 |          | 0.996 |
| DQB1 | -18 | V  | P | A | 0.534 | -0.127 | 0.021 | 2.28E-09 |          | 0.971 |
| DQB1 | -18 | A  | P | A | 0.434 | 0.123  | 0.021 | 6.40E-09 |          | 0.99  |
| DQB1 | -21 | D  | P | A | 0.361 | -0.142 | 0.022 | 2.95E-10 |          | 0.976 |
| DQB1 | -21 | G  | P | A | 0.607 | 0.129  | 0.022 | 2.79E-09 |          | 0.996 |
| DQB1 | 9   | Y  | P | A | 0.833 | 0.274  | 0.031 | 1.68E-18 |          | 0.913 |
| DQB1 | 9   | Yx | P | A | 0.833 | 0.274  | 0.031 | 1.68E-18 | 1.31E-18 | 0.913 |
| DQB1 | 9   | F  | P | A | 0.164 | -0.269 | 0.031 | 1.43E-17 |          | 0.912 |
| DQB1 | 9   | YL | P | A | 0.836 | 0.269  | 0.031 | 1.44E-17 |          | 0.912 |
| DQB1 | 13  | A  | P | A | 0.180 | 0.125  | 0.027 | 3.69E-06 |          | 0.984 |
| DQB1 | 13  | G  | P | A | 0.820 | -0.125 | 0.027 | 3.71E-06 |          | 0.985 |
| DQB1 | 26  | Y  | P | A | 0.180 | 0.125  | 0.027 | 3.70E-06 |          | 0.985 |
| DQB1 | 45  |    | E | G | 0.177 | 0.135  | 0.027 | 7.33E-07 |          | 0.985 |
| DQB1 | 53  |    | Q | L | 0.395 | -0.134 | 0.022 | 7.00E-10 |          | 0.997 |
| DQB1 | 55  | R  | P | A | 0.417 | -0.131 | 0.021 | 1.09E-09 |          | 0.997 |
| DQB1 | 70  | G  | P | A | 0.358 | -0.144 | 0.023 | 2.39E-10 |          | 0.965 |
| DQB1 | 70  | R  | P | A | 0.618 | 0.137  | 0.022 | 7.54E-10 |          | 0.966 |
| DQB1 | 84  | E  | P | A | 0.393 | -0.136 | 0.022 | 4.21E-10 |          | 0.996 |
| DQB1 | 84  | Q  | P | A | 0.605 | 0.134  | 0.022 | 7.06E-10 |          | 0.996 |
| DQB1 | 85  | V  | P | A | 0.393 | -0.136 | 0.022 | 4.21E-10 |          | 0.996 |
| DQB1 | 85  | L  | P | A | 0.605 | 0.134  | 0.022 | 7.07E-10 |          | 0.997 |
| DQB1 | 86  | A  | P | A | 0.361 | -0.148 | 0.023 | 5.23E-11 |          | 0.965 |
| DQB1 | 86  | EG | P | A | 0.637 | 0.146  | 0.023 | 9.21E-11 | 5.52E-10 | 0.965 |
| DQB1 | 86  | Ex | P | A | 0.607 | 0.136  | 0.022 | 4.20E-10 |          | 0.996 |
| DQB1 | 86  | E  | P | A | 0.605 | 0.134  | 0.022 | 7.07E-10 |          | 0.996 |
| DQB1 | 87  | F  | P | A | 0.212 | -0.171 | 0.027 | 2.55E-10 |          | 0.955 |
| DQB1 | 87  | Lx | P | A | 0.606 | 0.136  | 0.022 | 4.16E-10 | 7.08E-11 | 0.997 |
| DQB1 | 87  | LY | P | A | 0.786 | 0.167  | 0.027 | 5.35E-10 |          | 0.956 |
| DQB1 | 87  | L  | P | A | 0.605 | 0.134  | 0.022 | 6.99E-10 |          | 0.997 |
| DQB1 | 89  | G  | P | A | 0.393 | -0.136 | 0.022 | 4.20E-10 |          | 0.996 |

|      |     |     |   |   |       |        |       |          |          |       |
|------|-----|-----|---|---|-------|--------|-------|----------|----------|-------|
| DQB1 | 89  | T   | P | A | 0.605 | 0.134  | 0.022 | 7.06E-10 |          | 0.997 |
| DQB1 | 90  | I   | P | A | 0.394 | -0.136 | 0.022 | 4.16E-10 |          | 0.997 |
| DQB1 | 90  | T   | P | A | 0.605 | 0.134  | 0.022 | 6.99E-10 |          | 0.997 |
| DQB1 | 125 | Ax  | P | A | 0.606 | 0.136  | 0.022 | 4.17E-10 |          | 0.997 |
| DQB1 | 125 | A   | P | A | 0.605 | 0.134  | 0.022 | 6.99E-10 | 1.16E-09 | 0.998 |
| DQB1 | 125 | G   | P | A | 0.244 | -0.143 | 0.025 | 8.92E-09 |          | 0.998 |
| DQB1 | 125 | AS  | P | A | 0.752 | 0.141  | 0.025 | 1.62E-08 |          | 0.989 |
| DQB1 | 167 | R   | P | A | 0.817 | -0.127 | 0.027 | 2.18E-06 |          | 0.987 |
| DQB1 | 167 | H   | P | A | 0.181 | 0.125  | 0.027 | 3.24E-06 |          | 0.988 |
| DQB1 | 203 | V   | P | A | 0.391 | -0.131 | 0.022 | 1.71E-09 |          | 0.997 |
| DQB1 | 203 | I   | P | A | 0.606 | 0.130  | 0.022 | 2.79E-09 |          | 0.991 |
| DQB1 | 220 | R   | P | A | 0.394 | -0.135 | 0.022 | 4.57E-10 |          | 0.996 |
| DQB1 | 220 | H   | P | A | 0.603 | 0.134  | 0.022 | 7.30E-10 |          | 0.985 |
| DQB1 | 221 | Q   | P | A | 0.394 | -0.135 | 0.022 | 4.86E-10 |          | 0.995 |
| DQB1 | 221 | H   | P | A | 0.604 | 0.135  | 0.022 | 5.85E-10 |          | 0.986 |
| DRB1 | -1  | S   | P | A | 0.149 | -0.310 | 0.032 | 9.03E-22 |          | 0.994 |
| DRB1 | -1  | A   | P | A | 0.814 | 0.252  | 0.030 | 3.26E-17 |          | 0.921 |
| DRB1 | -17 | T   | P | A | 0.162 | -0.315 | 0.031 | 1.32E-23 |          | 0.977 |
| DRB1 | -17 | A   | P | A | 0.801 | 0.260  | 0.029 | 5.41E-19 |          | 0.911 |
| DRB1 | -24 | L   | P | A | 0.775 | -0.110 | 0.026 | 1.74E-05 |          | 0.937 |
| DRB1 | 9   | E   | P | A | 0.687 | 0.154  | 0.023 | 4.64E-11 |          | 0.985 |
| DRB1 | 9   | W   | P | A | 0.300 | -0.155 | 0.024 | 6.88E-11 |          | 0.985 |
| DRB1 | 11  | PL  | P | A | 0.162 | -0.315 | 0.031 | 1.32E-23 |          | 0.977 |
| DRB1 | 11  | SVG | P | A | 0.826 | 0.297  | 0.030 | 7.61E-23 |          | 0.978 |
| DRB1 | 11  | P   | P | A | 0.156 | -0.312 | 0.032 | 8.40E-23 |          | 1     |
| DRB1 | 11  | PD  | P | A | 0.168 | -0.294 | 0.030 | 4.84E-22 |          | 1     |
| DRB1 | 11  | SV  | P | A | 0.687 | 0.154  | 0.023 | 4.64E-11 | 8.68E-21 | 0.985 |
| DRB1 | 11  | SVD | P | A | 0.700 | 0.155  | 0.024 | 6.88E-11 |          | 0.985 |
| DRB1 | 11  | SVL | P | A | 0.693 | 0.150  | 0.023 | 1.77E-10 |          | 1     |
| DRB1 | 11  | PG  | P | A | 0.295 | -0.151 | 0.024 | 2.61E-10 |          | 1     |
| DRB1 | 11  | VG  | P | A | 0.332 | 0.088  | 0.022 | 4.56E-05 |          | 0.999 |
| DRB1 | 13  | RF  | P | A | 0.180 | -0.297 | 0.030 | 2.15E-23 |          | 0.978 |
| DRB1 | 13  | R   | P | A | 0.156 | -0.312 | 0.032 | 8.40E-23 |          | 1     |
| DRB1 | 13  | SHY | P | A | 0.772 | 0.242  | 0.027 | 7.94E-19 |          | 0.919 |
| DRB1 | 13  | RG  | P | A | 0.204 | -0.244 | 0.028 | 1.14E-17 |          | 0.932 |
| DRB1 | 13  | SHG | P | A | 0.682 | 0.158  | 0.023 | 1.28E-11 | 2.01E-21 | 0.985 |
| DRB1 | 13  | SH  | P | A | 0.634 | 0.147  | 0.023 | 1.47E-10 |          | 0.938 |
| DRB1 | 13  | RY  | P | A | 0.295 | -0.151 | 0.024 | 2.61E-10 |          | 1     |
| DRB1 | 13  | SHF | P | A | 0.657 | 0.137  | 0.023 | 3.06E-09 |          | 0.95  |
| DRB1 | 13  | SRF | P | A | 0.625 | -0.097 | 0.022 | 7.80E-06 |          | 0.952 |

|      |     |    |   |   |       |        |       |          |          |       |
|------|-----|----|---|---|-------|--------|-------|----------|----------|-------|
| DRB1 | 13  | HY | P | A | 0.327 | 0.093  | 0.022 | 1.86E-05 |          | 0.999 |
| DRB1 | 13  | HG | P | A | 0.237 | 0.103  | 0.025 | 4.04E-05 |          | 0.938 |
| DRB1 | 37  | S  | P | A | 0.169 | -0.321 | 0.031 | 2.90E-24 |          | 0.934 |
| DRB1 | 37  | SL | P | A | 0.184 | -0.303 | 0.031 | 8.26E-23 |          | 0.911 |
| DRB1 | 37  | SF | P | A | 0.323 | -0.160 | 0.024 | 4.56E-11 |          | 0.898 |
| DRB1 | 37  | NY | P | A | 0.662 | 0.156  | 0.024 | 9.94E-11 | 2.69E-21 | 0.889 |
| DRB1 | 37  | NS | P | A | 0.530 | -0.131 | 0.024 | 6.58E-08 |          | 0.695 |
| DRB1 | 37  | YF | P | A | 0.455 | 0.131  | 0.024 | 7.87E-08 |          | 0.703 |
| DRB1 | 37  | YL | P | A | 0.316 | 0.126  | 0.027 | 2.98E-06 |          | 0.674 |
| DRB1 | 37  | Y  | P | A | 0.301 | 0.127  | 0.027 | 3.10E-06 |          | 0.681 |
| DRB1 | 67  | L  | P | A | 0.344 | 0.121  | 0.027 | 9.71E-06 |          | 0.524 |
| DRB1 | 71  | A  | P | A | 0.127 | -0.384 | 0.039 | 1.04E-22 |          | 0.785 |
| DRB1 | 71  | KE | P | A | 0.481 | 0.174  | 0.029 | 1.43E-09 | 4.59E-22 | 0.48  |
| DRB1 | 71  | KR | P | A | 0.632 | 0.147  | 0.029 | 3.23E-07 |          | 0.478 |
| DRB1 | 96  | HY | P | A | 0.801 | 0.325  | 0.031 | 1.61E-25 |          | 0.796 |
| DRB1 | 96  | QE | P | A | 0.186 | -0.323 | 0.031 | 4.48E-25 |          | 0.864 |
| DRB1 | 96  | Qx | P | A | 0.175 | -0.320 | 0.031 | 2.80E-24 | 7.73E-23 | 0.91  |
| DRB1 | 96  | Q  | P | A | 0.162 | -0.310 | 0.031 | 3.03E-23 |          | 0.999 |
| DRB1 | 96  | H  | P | A | 0.612 | 0.096  | 0.023 | 3.12E-05 |          | 0.867 |
| DRB1 | 133 | R  | P | A | 0.818 | 0.326  | 0.032 | 2.50E-24 |          | 0.834 |
| DRB1 | 133 | L  | P | A | 0.156 | -0.311 | 0.032 | 1.08E-22 |          | 0.999 |
| DRB1 | 140 | T  | P | A | 0.643 | 0.171  | 0.024 | 1.65E-12 |          | 0.815 |
| DRB1 | 140 | A  | P | A | 0.331 | -0.163 | 0.024 | 1.14E-11 |          | 0.907 |
| DRB1 | 142 | V  | P | A | 0.818 | 0.326  | 0.032 | 2.50E-24 |          | 0.834 |
| DRB1 | 142 | M  | P | A | 0.156 | -0.311 | 0.032 | 1.08E-22 |          | 0.999 |

**Table S21:** Associations for HLA amino acid (AA) sequence substitutions that were significantly associated ( $P < 4.6 \times 10^{-5}$ ) with seroreactivity to EBV EBNA. At each position that contained a significantly associated allele and >2 possible substitutions, we tested all common (frequency  $\geq 0.01$ ) haplotypes at that position using the omnibus test ( $P_{\text{omni}}$ ) in the conditional haplotype module of PLINK 1.07. Variants and haplotypes with the lowest p-value are indicated in bold and shaded.

| Gene | AA position | AA | A1 | A2 | FRQ   | BETA   | SE    | P        | $P_{\text{omni}}$ | INFO     |
|------|-------------|----|----|----|-------|--------|-------|----------|-------------------|----------|
| A    | 152         | E  | P  | A  | 0.188 | 0.126  | 0.022 | 6.87E-09 | 6.51E-09          | 0.949    |
| A    | 152         | EW | P  | A  | 0.197 | 0.115  | 0.022 | 1.18E-07 |                   | 0.892    |
| A    | 152         | ER | P  | A  | 0.200 | 0.112  | 0.022 | 2.09E-07 |                   | 0.892    |
| A    | 152         | AV | P  | A  | 0.791 | -0.095 | 0.021 | 5.50E-06 |                   | 0.946    |
| A    | 161         |    | D  | E  | 0.146 | 0.126  | 0.024 | 1.11E-07 |                   | 0.999    |
| B    | 9           | D  | P  | A  | 0.146 | -0.137 | 0.024 | 1.27E-08 |                   | 0.999    |
| B    | 11          |    | S  | A  | 0.306 | 0.096  | 0.018 | 1.80E-07 |                   | 0.931    |
| B    | 12          |    | V  | M  | 0.321 | 0.089  | 0.018 | 5.20E-07 |                   | 0.997    |
| B    | 67          | Y  | P  | A  | 0.170 | 0.137  | 0.023 | 1.61E-09 | 2.12E-10          | 0.939    |
| B    | 67          | YS | P  | A  | 0.573 | 0.077  | 0.017 | 8.48E-06 |                   | 0.932    |
| B    | 67          | YC | P  | A  | 0.295 | 0.081  | 0.019 | 1.69E-05 |                   | 0.933    |
| B    | 67          | FM | P  | A  | 0.301 | -0.076 | 0.019 | 4.07E-05 |                   | 0.950    |
| B    | 70          | Q  | P  | A  | 0.169 | 0.137  | 0.023 | 1.61E-09 |                   | 0.944    |
| B    | 70          | QK | P  | A  | 0.226 | 0.101  | 0.020 | 7.13E-07 |                   | 0.943    |
| B    | 152         | E  | P  | A  | 0.292 | 0.205  | 0.025 | 4.90E-16 |                   | 0.484    |
| B    | 152         | V  | P  | A  | 0.689 | -0.178 | 0.023 | 1.27E-14 |                   | 0.559    |
| B    | 156         | RW | P  | A  | 0.184 | 0.174  | 0.026 | 4.23E-11 | 5.79E-10          | 0.623    |
| B    | 156         | Rx | P  | A  | 0.160 | 0.183  | 0.028 | 7.80E-11 |                   | 0.604    |
| B    | 156         | DL | P  | A  | 0.797 | -0.152 | 0.024 | 2.80E-10 |                   | 0.715    |
| B    | 156         | R  | P  | A  | 0.141 | 0.172  | 0.028 | 8.00E-10 |                   | 0.710    |
| B    | 156         | D  | P  | A  | 0.268 | -0.121 | 0.023 | 1.34E-07 |                   | 0.587    |
| B    | 156         | Dx | P  | A  | 0.287 | -0.119 | 0.023 | 3.67E-07 |                   | 0.529    |
| B    | 156         | DW | P  | A  | 0.311 | -0.104 | 0.023 | 5.06E-06 |                   | 0.529    |
| B    | 163         | Ex | P  | A  | 0.305 | 0.090  | 0.020 | 7.41E-06 |                   | 1.39E-04 |
| B    | 163         | T  | P  | A  | 0.280 | -0.083 | 0.020 | 2.79E-05 | 0.881             |          |
| B    | 163         | E  | P  | A  | 0.287 | 0.082  | 0.020 | 3.17E-05 | 0.824             |          |
| B    | 178         | T  | P  | A  | 0.771 | -0.137 | 0.023 | 1.12E-09 |                   | 0.712    |
| B    | 178         | K  | P  | A  | 0.210 | 0.128  | 0.022 | 9.08E-09 |                   | 0.800    |
| C    | 99          | S  | P  | A  | 0.157 | 0.143  | 0.023 | 3.22E-10 | 1.24E-09          | 0.998    |
| C    | 99          | YC | P  | A  | 0.749 | -0.112 | 0.019 | 3.19E-09 |                   | 0.998    |
| C    | 99          | YF | P  | A  | 0.808 | -0.122 | 0.021 | 7.00E-09 |                   | 0.998    |
| C    | 99          | Y  | P  | A  | 0.714 | -0.103 | 0.018 | 1.50E-08 |                   | 0.998    |
| DPB1 | 8           |    | V  | L  | 0.280 | -0.115 | 0.018 | 4.51E-10 |                   | 0.998    |



|      |     |    |   |   |       |        |       |          |       |
|------|-----|----|---|---|-------|--------|-------|----------|-------|
| DPB1 | 9   | Y  | P | A | 0.237 | -0.139 | 0.020 | 1.36E-12 | 0.995 |
| DPB1 | 9   | F  | P | A | 0.720 | 0.115  | 0.018 | 4.47E-10 | 0.998 |
| DPB1 | 11  |    | L | G | 0.216 | -0.145 | 0.020 | 8.23E-13 | 0.994 |
| DPB1 | 57  |    | D | E | 0.154 | -0.162 | 0.024 | 8.94E-12 | 0.965 |
| DPB1 | 65  |    | L | I | 0.172 | -0.178 | 0.023 | 6.56E-15 | 0.935 |
| DPB1 | 76  | M  | P | A | 0.779 | 0.102  | 0.021 | 1.32E-06 | 0.888 |
| DPB1 | 76  | V  | P | A | 0.201 | -0.097 | 0.022 | 1.10E-05 | 0.881 |
| DPB1 | 84  | D  | P | A | 0.307 | -0.086 | 0.018 | 1.72E-06 | 0.997 |
| DPB1 | 84  | G  | P | A | 0.686 | 0.086  | 0.018 | 1.91E-06 | 0.997 |
| DPB1 | 85  |    | E | G | 0.307 | -0.086 | 0.018 | 1.75E-06 | 0.997 |
| DPB1 | 86  |    | P | A | 0.693 | 0.086  | 0.018 | 1.74E-06 | 0.997 |
| DPB1 | 87  |    | V | M | 0.307 | -0.086 | 0.018 | 1.73E-06 | 0.997 |
| DPB1 | 96  | K  | P | A | 0.302 | -0.088 | 0.018 | 1.62E-06 | 0.991 |
| DPB1 | 96  | R  | P | A | 0.696 | 0.086  | 0.018 | 2.48E-06 | 0.996 |
| DPB1 | 170 | I  | P | A | 0.302 | -0.088 | 0.018 | 1.63E-06 | 0.991 |
| DPB1 | 170 | T  | P | A | 0.696 | 0.086  | 0.018 | 2.49E-06 | 0.996 |
| DPB1 | 178 | L  | P | A | 0.892 | -0.157 | 0.027 | 4.33E-09 | 0.975 |
| DPB1 | 178 | M  | P | A | 0.106 | 0.154  | 0.027 | 7.33E-09 | 0.991 |
| DQA1 | 11  | C  | P | A | 0.396 | 0.203  | 0.017 | 6.33E-33 | 0.999 |
| DQA1 | 11  | Y  | P | A | 0.604 | -0.203 | 0.017 | 6.33E-33 | 0.999 |
| DQA1 | -16 | M  | P | A | 0.580 | -0.193 | 0.017 | 1.46E-30 | 0.998 |
| DQA1 | -16 | L  | P | A | 0.420 | 0.193  | 0.017 | 2.67E-30 | 0.999 |
| DQA1 | 18  |    | F | S | 0.396 | 0.203  | 0.017 | 6.34E-33 | 0.999 |
| DQA1 | 26  |    | S | T | 0.204 | -0.123 | 0.021 | 7.46E-09 | 0.980 |
| DQA1 | 34  |    | E | Q | 0.484 | -0.158 | 0.017 | 1.52E-21 | 0.989 |
| DQA1 | 41  |    | K | R | 0.171 | 0.267  | 0.024 | 1.38E-29 | 0.816 |
| DQA1 | 45  |    | A | V | 0.396 | 0.203  | 0.017 | 6.47E-33 | 0.999 |
| DQA1 | 47  | R  | P | A | 0.395 | 0.204  | 0.017 | 7.00E-33 | 0.997 |
| DQA1 | 47  | RC | P | A | 0.660 | 0.203  | 0.018 | 1.16E-30 | 0.996 |
| DQA1 | 47  | K  | P | A | 0.136 | -0.231 | 0.025 | 8.82E-21 | 0.979 |
| DQA1 | 47  | RQ | P | A | 0.600 | 0.127  | 0.017 | 1.94E-13 | 0.986 |
| DQA1 | 47  | Q  | P | A | 0.204 | -0.123 | 0.021 | 7.46E-09 | 0.980 |
| DQA1 | 47  | RK | P | A | 0.531 | 0.091  | 0.017 | 6.50E-08 | 0.988 |
| DQA1 | 48  |    | W | L | 0.396 | 0.203  | 0.017 | 6.22E-33 | 0.999 |
| DQA1 | 50  | E  | P | A | 0.396 | 0.203  | 0.017 | 6.72E-33 | 0.998 |
| DQA1 | 50  | L  | P | A | 0.340 | -0.203 | 0.018 | 1.15E-30 | 0.996 |
| DQA1 | 52  | S  | P | A | 0.396 | 0.203  | 0.017 | 6.49E-33 | 0.999 |
| DQA1 | 52  | H  | P | A | 0.136 | -0.231 | 0.025 | 8.82E-21 | 0.979 |
| DQA1 | 52  | R  | P | A | 0.468 | -0.092 | 0.017 | 6.05E-08 | 0.989 |
| DQA1 | 53  | K  | P | A | 0.396 | 0.203  | 0.017 | 6.22E-33 | 0.999 |

|      |     |    |   |   |       |        |       |          |          |       |
|------|-----|----|---|---|-------|--------|-------|----------|----------|-------|
| DQA1 | 53  | R  | P | A | 0.340 | -0.203 | 0.018 | 1.15E-30 |          | 0.996 |
| DQA1 | 54  |    | L | F | 0.136 | -0.231 | 0.025 | 8.82E-21 |          | 0.979 |
| DQA1 | 55  |    | G | R | 0.396 | 0.203  | 0.017 | 6.71E-33 |          | 0.998 |
| DQA1 | 56  | G  | P | A | 0.396 | 0.203  | 0.017 | 6.71E-33 |          | 0.998 |
| DQA1 | 56  | x  | P | A | 0.400 | -0.127 | 0.017 | 2.07E-13 | 5.14E-32 | 0.985 |
| DQA1 | 56  | R  | P | A | 0.204 | -0.123 | 0.021 | 7.46E-09 |          | 0.980 |
| DQA1 | 61  |    | G | F | 0.396 | 0.203  | 0.017 | 6.21E-33 |          | 0.999 |
| DQA1 | 64  |    | R | T | 0.396 | 0.203  | 0.017 | 6.73E-33 |          | 0.998 |
| DQA1 | 66  |    | M | I | 0.396 | 0.203  | 0.017 | 6.21E-33 |          | 0.999 |
| DQA1 | 69  | A  | P | A | 0.396 | 0.203  | 0.017 | 6.21E-33 |          | 0.999 |
| DQA1 | 69  | L  | P | A | 0.580 | -0.193 | 0.017 | 2.15E-30 |          | 0.998 |
| DQA1 | 76  | M  | P | A | 0.396 | 0.203  | 0.017 | 6.50E-33 |          | 0.998 |
| DQA1 | 76  | L  | P | A | 0.400 | -0.127 | 0.017 | 2.07E-13 | 5.14E-32 | 0.985 |
| DQA1 | 76  | V  | P | A | 0.204 | -0.123 | 0.021 | 7.46E-09 |          | 0.980 |
| DQA1 | 80  |    | Y | S | 0.396 | 0.203  | 0.017 | 6.21E-33 |          | 0.999 |
| DQA1 | 129 | H  | P | A | 0.776 | -0.101 | 0.021 | 2.33E-06 |          | 0.831 |
| DQA1 | 129 | Q  | P | A | 0.224 | 0.101  | 0.021 | 2.35E-06 |          | 0.831 |
| DQA1 | 130 | S  | P | A | 0.829 | -0.267 | 0.024 | 1.29E-29 |          | 0.817 |
| DQA1 | 130 | A  | P | A | 0.172 | 0.267  | 0.023 | 1.32E-29 |          | 0.818 |
| DQA1 | 175 | Qx | P | A | 0.396 | 0.204  | 0.017 | 5.72E-33 |          | 0.999 |
| DQA1 | 175 | Q  | P | A | 0.396 | 0.204  | 0.017 | 5.85E-33 | 3.21E-39 | 0.999 |
| DQA1 | 175 | E  | P | A | 0.364 | -0.205 | 0.017 | 6.68E-32 |          | 0.996 |
| DQA1 | 175 | QK | P | A | 0.636 | 0.205  | 0.017 | 6.72E-32 |          | 0.996 |
| DQA1 | 187 | T  | P | A | 0.206 | -0.127 | 0.021 | 2.27E-09 |          | 0.971 |
| DQA1 | 187 | A  | P | A | 0.795 | 0.125  | 0.021 | 3.72E-09 |          | 0.971 |
| DQA1 | 207 | M  | P | A | 0.085 | 0.181  | 0.036 | 4.94E-07 |          | 0.593 |
| DQA1 | 207 | V  | P | A | 0.915 | -0.181 | 0.036 | 5.02E-07 |          | 0.593 |
| DQA1 | 215 | L  | P | A | 0.339 | -0.203 | 0.018 | 2.02E-30 |          | 0.996 |
| DQA1 | 215 | F  | P | A | 0.661 | 0.203  | 0.018 | 2.05E-30 |          | 0.996 |
| DQA1 | 218 | Q  | P | A | 0.397 | 0.203  | 0.017 | 1.29E-32 |          | 0.999 |
| DQA1 | 218 | R  | P | A | 0.603 | -0.203 | 0.017 | 1.35E-32 |          | 0.999 |
| DQB1 | -4  | L  | P | A | 0.361 | 0.217  | 0.017 | 3.73E-35 |          | 0.976 |
| DQB1 | -4  | V  | P | A | 0.607 | -0.207 | 0.017 | 8.70E-34 |          | 0.997 |
| DQB1 | -5  | Px | P | A | 0.639 | -0.217 | 0.017 | 3.73E-35 |          | 0.976 |
| DQB1 | -5  | P  | P | A | 0.607 | -0.207 | 0.017 | 8.48E-34 | 2.73E-38 | 0.996 |
| DQB1 | -5  | L  | P | A | 0.211 | 0.243  | 0.020 | 1.89E-33 |          | 0.970 |
| DQB1 | -5  | PS | P | A | 0.757 | -0.216 | 0.019 | 3.65E-30 |          | 0.997 |
| DQB1 | -6  | Tx | P | A | 0.637 | -0.218 | 0.017 | 2.99E-35 |          | 0.967 |
| DQB1 | -6  | S  | P | A | 0.361 | 0.217  | 0.017 | 3.73E-35 | 5.24E-34 | 0.976 |
| DQB1 | -6  | T  | P | A | 0.605 | -0.208 | 0.017 | 6.77E-34 |          | 0.988 |

|             |           |          |          |          |              |               |              |                 |          |              |
|-------------|-----------|----------|----------|----------|--------------|---------------|--------------|-----------------|----------|--------------|
| DQB1        | -6        | TA       | P        | A        | 0.607        | -0.207        | 0.017        | 8.79E-34        |          | 0.996        |
| DQB1        | -10       | S        | P        | A        | 0.254        | -0.256        | 0.019        | 2.20E-39        |          | 0.999        |
| DQB1        | -10       | A        | P        | A        | 0.714        | 0.240         | 0.019        | 9.83E-37        |          | 0.974        |
| DQB1        | -18       | A        | P        | A        | 0.434        | -0.165        | 0.017        | 2.09E-22        |          | 0.990        |
| DQB1        | -18       | V        | P        | A        | 0.534        | 0.163         | 0.017        | 4.97E-22        |          | 0.971        |
| DQB1        | -21       | D        | P        | A        | 0.361        | 0.217         | 0.017        | 3.73E-35        |          | 0.976        |
| DQB1        | -21       | G        | P        | A        | 0.607        | -0.207        | 0.017        | 9.02E-34        |          | 0.996        |
| DQB1        | 9         | YL       | P        | A        | 0.836        | -0.218        | 0.023        | 1.09E-21        |          | 0.912        |
| DQB1        | 9         | F        | P        | A        | 0.164        | 0.218         | 0.023        | 1.10E-21        | 4.05E-21 | 0.912        |
| DQB1        | 9         | Y        | P        | A        | 0.833        | -0.210        | 0.022        | 1.09E-20        |          | 0.913        |
| DQB1        | 9         | Yx       | P        | A        | 0.833        | -0.210        | 0.022        | 1.09E-20        |          | 0.913        |
| DQB1        | 28        |          | S        | T        | 0.254        | -0.256        | 0.019        | 2.17E-39        |          | 1.000        |
| DQB1        | 30        | S        | P        | A        | 0.254        | -0.256        | 0.019        | 2.17E-39        |          | 1.000        |
| DQB1        | 30        | Y        | P        | A        | 0.500        | 0.119         | 0.017        | 4.56E-12        | 1.37E-38 | 0.939        |
| DQB1        | 30        | H        | P        | A        | 0.246        | 0.105         | 0.020        | 1.42E-07        |          | 0.918        |
| DQB1        | 37        | Y        | P        | A        | 0.743        | 0.256         | 0.019        | 8.87E-40        |          | 0.999        |
| DQB1        | 37        | I        | P        | A        | 0.254        | -0.256        | 0.019        | 2.17E-39        |          | 1.000        |
| DQB1        | 38        |          | V        | A        | 0.409        | -0.163        | 0.017        | 8.38E-22        |          | 0.996        |
| DQB1        | 46        |          | E        | V        | 0.254        | -0.256        | 0.019        | 2.24E-39        |          | 0.999        |
| DQB1        | 47        |          | F        | Y        | 0.254        | -0.256        | 0.019        | 2.17E-39        |          | 0.999        |
| DQB1        | 52        |          | L        | P        | 0.254        | -0.256        | 0.019        | 2.16E-39        |          | 0.999        |
| DQB1        | 53        |          | Q        | L        | 0.395        | 0.204         | 0.017        | 5.33E-33        |          | 0.997        |
| DQB1        | 55        | L        | P        | A        | 0.254        | -0.256        | 0.019        | 2.16E-39        |          | 0.999        |
| DQB1        | 55        | R        | P        | A        | 0.417        | 0.198         | 0.017        | 1.33E-31        |          | 0.997        |
| <b>DQB1</b> | <b>57</b> | <b>A</b> | <b>P</b> | <b>A</b> | <b>0.401</b> | <b>-0.237</b> | <b>0.017</b> | <b>1.37E-42</b> |          | <b>0.982</b> |
| DQB1        | 57        | AV       | P        | A        | 0.552        | -0.231        | 0.017        | 1.06E-41        | 6.13E-44 | 0.952        |
| DQB1        | 57        | AS       | P        | A        | 0.411        | -0.223        | 0.017        | 1.43E-38        |          | 0.981        |
| DQB1        | 57        | D        | P        | A        | 0.438        | 0.222         | 0.017        | 2.16E-38        |          | 0.950        |
| DQB1        | 66        |          | D        | E        | 0.281        | -0.244        | 0.019        | 4.39E-38        |          | 0.998        |
| DQB1        | 67        |          | I        | V        | 0.281        | -0.244        | 0.019        | 4.45E-38        |          | 0.998        |
| DQB1        | 70        | G        | P        | A        | 0.358        | 0.218         | 0.018        | 4.86E-35        |          | 0.965        |
| DQB1        | 70        | R        | P        | A        | 0.618        | -0.210        | 0.017        | 1.02E-33        |          | 0.966        |
| DQB1        | 71        | K        | P        | A        | 0.254        | -0.256        | 0.019        | 2.16E-39        |          | 0.999        |
| DQB1        | 71        | KD       | P        | A        | 0.278        | -0.243        | 0.019        | 1.18E-37        | 4.64E-38 | 0.998        |
| DQB1        | 71        | KA       | P        | A        | 0.404        | -0.164        | 0.017        | 8.36E-22        |          | 0.996        |
| DQB1        | 71        | T        | P        | A        | 0.572        | 0.162         | 0.017        | 1.04E-21        |          | 0.995        |
| DQB1        | 74        | A        | P        | A        | 0.254        | -0.256        | 0.019        | 2.16E-39        |          | 0.999        |
| DQB1        | 74        | E        | P        | A        | 0.572        | 0.162         | 0.017        | 1.01E-21        |          | 0.995        |
| DQB1        | 75        |          | V        | L        | 0.428        | -0.162        | 0.017        | 1.04E-21        |          | 0.995        |
| DQB1        | 77        |          | R        | T        | 0.406        | -0.162        | 0.017        | 2.23E-21        |          | 0.995        |

|      |     |     |   |   |       |        |       |          |          |       |
|------|-----|-----|---|---|-------|--------|-------|----------|----------|-------|
| DQB1 | 84  | Q   | P | A | 0.605 | -0.204 | 0.017 | 5.58E-33 |          | 0.996 |
| DQB1 | 84  | E   | P | A | 0.393 | 0.203  | 0.017 | 1.46E-32 |          | 0.996 |
| DQB1 | 85  | L   | P | A | 0.605 | -0.204 | 0.017 | 5.54E-33 |          | 0.997 |
| DQB1 | 85  | V   | P | A | 0.393 | 0.203  | 0.017 | 1.46E-32 |          | 0.996 |
| DQB1 | 86  | EG  | P | A | 0.637 | -0.216 | 0.017 | 1.16E-34 |          | 0.965 |
| DQB1 | 86  | A   | P | A | 0.361 | 0.215  | 0.018 | 3.26E-34 | 1.71E-33 | 0.965 |
| DQB1 | 86  | E   | P | A | 0.605 | -0.204 | 0.017 | 5.58E-33 |          | 0.996 |
| DQB1 | 86  | Ex  | P | A | 0.607 | -0.203 | 0.017 | 1.45E-32 |          | 0.996 |
| DQB1 | 87  | L   | P | A | 0.605 | -0.204 | 0.017 | 5.34E-33 |          | 0.997 |
| DQB1 | 87  | LY  | P | A | 0.786 | -0.240 | 0.020 | 9.27E-33 | 4.61E-38 | 0.956 |
| DQB1 | 87  | Lx  | P | A | 0.606 | -0.203 | 0.017 | 1.40E-32 |          | 0.997 |
| DQB1 | 87  | F   | P | A | 0.212 | 0.240  | 0.020 | 2.05E-32 |          | 0.955 |
| DQB1 | 89  | T   | P | A | 0.605 | -0.204 | 0.017 | 5.58E-33 |          | 0.997 |
| DQB1 | 89  | G   | P | A | 0.393 | 0.203  | 0.017 | 1.46E-32 |          | 0.996 |
| DQB1 | 90  | T   | P | A | 0.605 | -0.204 | 0.017 | 5.33E-33 |          | 0.997 |
| DQB1 | 90  | I   | P | A | 0.394 | 0.203  | 0.017 | 1.40E-32 |          | 0.997 |
| DQB1 | 125 | A   | P | A | 0.605 | -0.204 | 0.017 | 5.33E-33 |          | 0.998 |
| DQB1 | 125 | Ax  | P | A | 0.606 | -0.203 | 0.017 | 1.39E-32 | 4.20E-35 | 0.997 |
| DQB1 | 125 | G   | P | A | 0.244 | 0.211  | 0.019 | 6.99E-29 |          | 0.998 |
| DQB1 | 125 | AS  | P | A | 0.752 | -0.211 | 0.019 | 7.35E-29 |          | 0.989 |
| DQB1 | 135 | G   | P | A | 0.100 | -0.217 | 0.028 | 1.03E-14 |          | 0.993 |
| DQB1 | 135 | D   | P | A | 0.898 | 0.209  | 0.028 | 6.04E-14 |          | 0.991 |
| DQB1 | 203 | I   | P | A | 0.606 | -0.206 | 0.017 | 2.01E-33 |          | 0.991 |
| DQB1 | 203 | V   | P | A | 0.391 | 0.206  | 0.017 | 2.61E-33 |          | 0.997 |
| DQB1 | 220 | R   | P | A | 0.394 | 0.203  | 0.017 | 1.24E-32 |          | 0.996 |
| DQB1 | 220 | H   | P | A | 0.603 | -0.203 | 0.017 | 2.38E-32 |          | 0.985 |
| DQB1 | 221 | Q   | P | A | 0.394 | 0.203  | 0.017 | 1.20E-32 |          | 0.995 |
| DQB1 | 221 | H   | P | A | 0.604 | -0.203 | 0.017 | 2.34E-32 |          | 0.986 |
| DRB1 | -1  | A   | P | A | 0.814 | -0.230 | 0.022 | 2.71E-26 |          | 0.921 |
| DRB1 | -1  | S   | P | A | 0.149 | 0.239  | 0.023 | 1.06E-25 |          | 0.994 |
| DRB1 | -17 | A   | P | A | 0.801 | -0.235 | 0.021 | 2.62E-28 |          | 0.911 |
| DRB1 | -17 | T   | P | A | 0.162 | 0.242  | 0.022 | 1.59E-27 |          | 0.977 |
| DRB1 | -24 | F   | P | A | 0.188 | -0.147 | 0.022 | 1.67E-11 |          | 0.997 |
| DRB1 | -24 | L   | P | A | 0.775 | 0.124  | 0.021 | 4.11E-09 |          | 0.937 |
| DRB1 | 4   | R   | P | A | 0.846 | 0.187  | 0.023 | 1.44E-15 |          | 0.974 |
| DRB1 | 4   | Q   | P | A | 0.151 | -0.186 | 0.023 | 1.50E-15 |          | 1.000 |
| DRB1 | 11  | VG  | P | A | 0.332 | -0.221 | 0.018 | 6.95E-36 |          | 0.999 |
| DRB1 | 11  | SPD | P | A | 0.662 | 0.220  | 0.018 | 1.70E-35 | 2.60E-49 | 0.986 |
| DRB1 | 11  | SVG | P | A | 0.826 | -0.250 | 0.021 | 5.55E-31 |          | 0.978 |
| DRB1 | 11  | PD  | P | A | 0.168 | 0.251  | 0.022 | 6.11E-31 |          | 1.000 |

|      |    |     |   |   |       |        |       |          |       |
|------|----|-----|---|---|-------|--------|-------|----------|-------|
| DRB1 | 11 | SPL | P | A | 0.655 | 0.202  | 0.017 | 7.17E-31 | 0.999 |
| DRB1 | 11 | SP  | P | A | 0.650 | 0.201  | 0.017 | 1.50E-30 | 0.986 |
| DRB1 | 11 | PL  | P | A | 0.162 | 0.242  | 0.022 | 1.59E-27 | 0.977 |
| DRB1 | 11 | P   | P | A | 0.156 | 0.243  | 0.022 | 1.64E-27 | 1.000 |
| DRB1 | 11 | G   | P | A | 0.138 | -0.229 | 0.024 | 4.29E-21 | 1.000 |
| DRB1 | 11 | GL  | P | A | 0.144 | -0.223 | 0.024 | 1.96E-20 | 0.974 |
| DRB1 | 11 | GD  | P | A | 0.151 | -0.186 | 0.023 | 1.50E-15 | 1.000 |
| DRB1 | 11 | SPV | P | A | 0.844 | 0.182  | 0.023 | 4.37E-15 | 0.975 |
| DRB1 | 11 | V   | P | A | 0.194 | -0.145 | 0.021 | 1.47E-11 | 0.999 |
| DRB1 | 11 | VL  | P | A | 0.200 | -0.142 | 0.021 | 3.24E-11 | 0.980 |
| DRB1 | 11 | VD  | P | A | 0.206 | -0.118 | 0.021 | 1.91E-08 | 0.999 |
| DRB1 | 11 | SPG | P | A | 0.788 | 0.115  | 0.021 | 3.40E-08 | 0.981 |
| DRB1 | 13 | SHY | P | A | 0.772 | -0.269 | 0.020 | 2.58E-41 | 0.919 |
| DRB1 | 13 | RG  | P | A | 0.204 | 0.268  | 0.021 | 1.76E-38 | 0.932 |
| DRB1 | 13 | HY  | P | A | 0.327 | -0.222 | 0.018 | 8.36E-36 | 0.999 |
| DRB1 | 13 | SRG | P | A | 0.650 | 0.201  | 0.017 | 1.50E-30 | 0.986 |
| DRB1 | 13 | RF  | P | A | 0.180 | 0.243  | 0.021 | 6.99E-30 | 0.978 |
| DRB1 | 13 | R   | P | A | 0.156 | 0.243  | 0.022 | 1.64E-27 | 1.000 |
| DRB1 | 13 | SRF | P | A | 0.625 | 0.175  | 0.018 | 4.92E-23 | 0.952 |
| DRB1 | 13 | Y   | P | A | 0.138 | -0.229 | 0.024 | 4.29E-21 | 1.000 |
| DRB1 | 13 | SR  | P | A | 0.602 | 0.157  | 0.017 | 2.66E-19 | 0.940 |
| DRB1 | 13 | YF  | P | A | 0.162 | -0.179 | 0.023 | 4.95E-15 | 0.976 |
| DRB1 | 13 | H   | P | A | 0.189 | -0.146 | 0.022 | 1.66E-11 | 0.999 |
| DRB1 | 13 | FG  | P | A | 0.071 | 0.226  | 0.035 | 1.20E-10 | 0.784 |
| DRB1 | 13 | SY  | P | A | 0.584 | -0.107 | 0.017 | 6.07E-10 | 0.941 |
| DRB1 | 13 | G   | P | A | 0.048 | 0.260  | 0.043 | 1.86E-09 | 0.753 |
| DRB1 | 13 | HF  | P | A | 0.212 | -0.115 | 0.021 | 3.40E-08 | 0.981 |
| DRB1 | 13 | YG  | P | A | 0.186 | -0.122 | 0.022 | 3.84E-08 | 0.924 |
| DRB1 | 13 | SYF | P | A | 0.607 | -0.095 | 0.017 | 5.14E-08 | 0.953 |
| DRB1 | 13 | SH  | P | A | 0.634 | -0.086 | 0.018 | 9.34E-07 | 0.938 |
| DRB1 | 13 | SRH | P | A | 0.790 | 0.091  | 0.021 | 1.66E-05 | 0.912 |
| DRB1 | 13 | SHF | P | A | 0.657 | -0.074 | 0.018 | 3.04E-05 | 0.950 |
| DRB1 | 14 | NA  | K | E | 0.138 | -0.229 | 0.024 | 4.29E-21 | 1.000 |
| DRB1 | 16 | Y   | P | A | 0.048 | 0.260  | 0.043 | 1.86E-09 | 0.753 |
| DRB1 | 16 | H   | P | A | 0.952 | -0.260 | 0.043 | 1.89E-09 | 0.751 |
| DRB1 | 25 | NA  | Q | R | 0.138 | -0.229 | 0.024 | 4.29E-21 | 1.000 |
| DRB1 | 26 | F   | P | A | 0.837 | -0.219 | 0.032 | 6.59E-12 | 0.343 |
| DRB1 | 26 | L   | P | A | 0.026 | 0.389  | 0.058 | 2.49E-11 | 0.719 |
| DRB1 | 28 | E   | P | A | 0.175 | -0.151 | 0.023 | 1.10E-10 | 0.876 |
| DRB1 | 28 | D   | P | A | 0.812 | 0.118  | 0.023 | 1.91E-07 | 0.882 |

2.95E-51

|      |    |     |   |   |       |        |       |          |          |       |
|------|----|-----|---|---|-------|--------|-------|----------|----------|-------|
| DRB1 | 30 | H   | P | A | 0.023 | 0.821  | 0.076 | 5.58E-27 |          | 0.470 |
| DRB1 | 30 | HG  | P | A | 0.035 | 0.540  | 0.054 | 1.02E-23 |          | 0.647 |
| DRB1 | 30 | CH  | P | A | 0.029 | 0.653  | 0.067 | 2.97E-22 |          | 0.462 |
| DRB1 | 30 | YLR | P | A | 0.959 | -0.483 | 0.050 | 1.12E-21 |          | 0.618 |
| DRB1 | 30 | L   | P | A | 0.138 | -0.229 | 0.024 | 4.29E-21 |          | 1.000 |
| DRB1 | 30 | LR  | P | A | 0.144 | -0.224 | 0.024 | 7.32E-21 |          | 0.999 |
| DRB1 | 30 | LC  | P | A | 0.144 | -0.223 | 0.024 | 1.96E-20 |          | 0.974 |
| DRB1 | 30 | YHG | P | A | 0.850 | 0.218  | 0.024 | 3.10E-20 |          | 0.974 |
| DRB1 | 30 | YLC | P | A | 0.959 | -0.436 | 0.049 | 5.44E-19 |          | 0.693 |
| DRB1 | 30 | HR  | P | A | 0.028 | 0.555  | 0.064 | 3.51E-18 |          | 0.568 |
| DRB1 | 30 | YL  | P | A | 0.954 | -0.399 | 0.046 | 8.51E-18 |          | 0.661 |
| DRB1 | 30 | YLG | P | A | 0.966 | -0.473 | 0.058 | 5.19E-16 |          | 0.548 |
| DRB1 | 30 | LG  | P | A | 0.151 | -0.186 | 0.023 | 1.50E-15 | 3.74E-34 | 1.000 |
| DRB1 | 30 | YCH | P | A | 0.844 | 0.183  | 0.023 | 1.78E-15 |          | 1.000 |
| DRB1 | 30 | YHR | P | A | 0.844 | 0.182  | 0.023 | 4.37E-15 |          | 0.975 |
| DRB1 | 30 | YH  | P | A | 0.838 | 0.179  | 0.023 | 4.95E-15 |          | 0.976 |
| DRB1 | 30 | YCG | P | A | 0.833 | 0.138  | 0.023 | 4.02E-09 |          | 0.913 |
| DRB1 | 30 | LH  | P | A | 0.161 | -0.140 | 0.024 | 4.32E-09 |          | 0.910 |
| DRB1 | 30 | YG  | P | A | 0.827 | 0.134  | 0.023 | 7.92E-09 |          | 0.893 |
| DRB1 | 30 | YGR | P | A | 0.833 | 0.136  | 0.024 | 8.54E-09 |          | 0.890 |
| DRB1 | 30 | YC  | P | A | 0.821 | 0.105  | 0.023 | 3.37E-06 |          | 0.918 |
| DRB1 | 30 | YCR | P | A | 0.826 | 0.106  | 0.023 | 3.94E-06 |          | 0.916 |
| DRB1 | 30 | Y   | P | A | 0.815 | 0.103  | 0.023 | 5.36E-06 |          | 0.898 |
| DRB1 | 30 | YR  | P | A | 0.821 | 0.103  | 0.023 | 6.34E-06 |          | 0.896 |
| DRB1 | 33 | NA  | H | N | 0.189 | -0.146 | 0.022 | 1.70E-11 |          | 0.999 |
| DRB1 | 37 | SL  | P | A | 0.184 | 0.287  | 0.022 | 1.55E-39 |          | 0.911 |
| DRB1 | 37 | YF  | P | A | 0.455 | -0.227 | 0.019 | 2.45E-31 |          | 0.703 |
| DRB1 | 37 | S   | P | A | 0.169 | 0.243  | 0.022 | 2.21E-27 |          | 0.934 |
| DRB1 | 37 | NS  | P | A | 0.530 | 0.182  | 0.019 | 1.01E-20 |          | 0.695 |
| DRB1 | 37 | L   | P | A | 0.015 | 0.685  | 0.077 | 4.69E-19 |          | 0.722 |
| DRB1 | 37 | F   | P | A | 0.155 | -0.189 | 0.024 | 7.10E-15 | 1.11E-55 | 0.898 |
| DRB1 | 37 | NF  | P | A | 0.516 | -0.123 | 0.020 | 2.77E-10 |          | 0.703 |
| DRB1 | 37 | Y   | P | A | 0.301 | -0.133 | 0.022 | 1.58E-09 |          | 0.681 |
| DRB1 | 37 | NY  | P | A | 0.662 | -0.093 | 0.018 | 3.69E-07 |          | 0.889 |
| DRB1 | 37 | FL  | P | A | 0.170 | -0.112 | 0.023 | 1.73E-06 |          | 0.885 |
| DRB1 | 38 | L   | P | A | 0.015 | 0.685  | 0.077 | 4.69E-19 |          | 0.722 |
| DRB1 | 38 | V   | P | A | 0.979 | -0.456 | 0.064 | 9.79E-13 |          | 0.792 |
| DRB1 | 47 |     | F | Y | 0.545 | 0.188  | 0.019 | 1.94E-22 |          | 0.750 |
| DRB1 | 57 | DA  | P | A | 0.781 | 0.126  | 0.022 | 1.35E-08 |          | 0.821 |
| DRB1 | 57 | V   | P | A | 0.166 | -0.117 | 0.023 | 2.94E-07 | 9.94E-05 | 0.969 |

|      |     |    |   |   |       |        |       |          |          |       |
|------|-----|----|---|---|-------|--------|-------|----------|----------|-------|
| DRB1 | 57  | D  | P | A | 0.766 | 0.093  | 0.022 | 2.80E-05 | 0.774    |       |
| DRB1 | 60  | S  | P | A | 0.166 | -0.117 | 0.023 | 2.94E-07 | 0.969    |       |
| DRB1 | 70  | R  | P | A | 0.033 | 0.352  | 0.057 | 6.75E-10 | 0.606    |       |
| DRB1 | 70  | D  | P | A | 0.523 | -0.129 | 0.022 | 4.78E-09 | 0.488    |       |
| DRB1 | 71  | A  | P | A | 0.127 | 0.300  | 0.027 | 1.32E-27 | 0.785    |       |
| DRB1 | 71  | KA | P | A | 0.367 | 0.210  | 0.027 | 3.16E-15 | 0.328    |       |
| DRB1 | 71  | KR | P | A | 0.632 | -0.141 | 0.023 | 6.10E-10 | 7.89E-27 | 0.478 |
| DRB1 | 71  | KE | P | A | 0.481 | -0.106 | 0.022 | 1.58E-06 | 0.480    |       |
| DRB1 | 71  | R  | P | A | 0.392 | -0.117 | 0.026 | 6.20E-06 | 0.351    |       |
| DRB1 | 73  |    | G | A | 0.259 | -0.185 | 0.024 | 7.46E-15 | 0.542    |       |
| DRB1 | 74  | Q  | P | A | 0.138 | -0.229 | 0.024 | 4.29E-21 | 1.000    |       |
| DRB1 | 74  | QL | P | A | 0.164 | -0.211 | 0.023 | 2.32E-20 | 0.988    |       |
| DRB1 | 74  | AE | P | A | 0.715 | 0.180  | 0.023 | 3.00E-15 | 0.558    |       |
| DRB1 | 74  | RQ | P | A | 0.259 | -0.185 | 0.024 | 7.46E-15 | 0.542    |       |
| DRB1 | 74  | RA | P | A | 0.794 | 0.158  | 0.022 | 1.62E-12 | 5.23E-27 | 0.835 |
| DRB1 | 74  | QE | P | A | 0.180 | -0.167 | 0.024 | 1.85E-12 | 0.825    |       |
| DRB1 | 74  | E  | P | A | 0.042 | 0.381  | 0.065 | 5.26E-09 | 0.350    |       |
| DRB1 | 74  | A  | P | A | 0.674 | 0.126  | 0.022 | 1.40E-08 | 0.554    |       |
| DRB1 | 74  | AL | P | A | 0.700 | 0.125  | 0.023 | 5.31E-08 | 0.540    |       |
| DRB1 | 74  | RE | P | A | 0.162 | 0.174  | 0.034 | 3.69E-07 | 0.321    |       |
| DRB1 | 78  |    | V | Y | 0.151 | -0.186 | 0.023 | 1.50E-15 | 1.000    |       |
| DRB1 | 85  |    | A | V | 0.024 | 0.666  | 0.076 | 2.38E-18 | 0.456    |       |
| DRB1 | 86  |    | V | G | 0.477 | 0.208  | 0.025 | 2.01E-16 | 0.364    |       |
| DRB1 | 96  | Qx | P | A | 0.175 | 0.241  | 0.022 | 6.17E-27 | 0.910    |       |
| DRB1 | 96  | Q  | P | A | 0.162 | 0.235  | 0.022 | 1.68E-26 | 0.999    |       |
| DRB1 | 96  | QE | P | A | 0.186 | 0.236  | 0.022 | 3.92E-26 | 0.864    |       |
| DRB1 | 96  | HY | P | A | 0.801 | -0.236 | 0.022 | 5.20E-26 | 2.45E-29 | 0.796 |
| DRB1 | 96  | HQ | P | A | 0.774 | 0.149  | 0.022 | 5.26E-12 | 0.822    |       |
| DRB1 | 96  | Yx | P | A | 0.201 | -0.151 | 0.022 | 7.43E-12 | 0.923    |       |
| DRB1 | 96  | YE | P | A | 0.213 | -0.147 | 0.022 | 8.04E-12 | 0.880    |       |
| DRB1 | 96  | Y  | P | A | 0.188 | -0.146 | 0.022 | 1.86E-11 | 0.997    |       |
| DRB1 | 98  | K  | P | A | 0.648 | 0.210  | 0.018 | 6.91E-32 | 0.946    |       |
| DRB1 | 98  | E  | P | A | 0.339 | -0.203 | 0.018 | 1.10E-30 | 0.998    |       |
| DRB1 | 104 | S  | P | A | 0.638 | 0.216  | 0.018 | 1.03E-32 | 0.906    |       |
| DRB1 | 104 | A  | P | A | 0.339 | -0.203 | 0.018 | 1.10E-30 | 0.998    |       |
| DRB1 | 120 | S  | P | A | 0.781 | 0.153  | 0.022 | 3.47E-12 | 0.858    |       |
| DRB1 | 120 | N  | P | A | 0.194 | -0.145 | 0.021 | 1.64E-11 | 0.997    |       |
| DRB1 | 133 | R  | P | A | 0.818 | -0.251 | 0.023 | 3.80E-28 | 0.834    |       |
| DRB1 | 133 | L  | P | A | 0.156 | 0.243  | 0.022 | 1.37E-27 | 0.999    |       |
| DRB1 | 142 | V  | P | A | 0.818 | -0.251 | 0.023 | 3.80E-28 | 0.834    |       |

|      |     |   |   |   |       |        |       |          |       |
|------|-----|---|---|---|-------|--------|-------|----------|-------|
| DRB1 | 142 | M | P | A | 0.156 | 0.243  | 0.022 | 1.37E-27 | 0.999 |
| DRB1 | 180 | V | P | A | 0.752 | 0.152  | 0.022 | 2.83E-12 | 0.780 |
| DRB1 | 180 | L | P | A | 0.196 | -0.150 | 0.022 | 9.00E-12 | 0.951 |
| DRB1 | 181 | T | P | A | 0.789 | 0.182  | 0.022 | 6.07E-16 | 0.766 |
| DRB1 | 181 | M | P | A | 0.163 | -0.186 | 0.023 | 1.12E-15 | 0.949 |



**Table S22:** Associations for HLA amino acid (AA) sequence substitutions that were significantly associated ( $P < 4.6 \times 10^{-5}$ ) with seroreactivity to EBV EA-D. At each position that contained a significantly associated allele and >2 possible substitutions, we tested all common (frequency  $\geq 0.01$ ) haplotypes at that position using the omnibus test ( $P_{\text{omni}}$ ) in the conditional haplotype module of PLINK 1.07. Variants and haplotypes with the lowest p-value are indicated in bold and shaded.

| Gene     | AA position | AA       | A1       | A2       | FRQ          | BETA          | SE           | P               | $P_{\text{omni}}$ | INFO         |
|----------|-------------|----------|----------|----------|--------------|---------------|--------------|-----------------|-------------------|--------------|
| A        | 70          |          | Q        | H        | 0.301        | 0.100         | 0.019        | 1.66E-07        |                   | 0.905        |
| A        | 152         | EW       | P        | A        | 0.197        | 0.103         | 0.022        | 3.21E-06        | 3.67E-05          | 0.892        |
| A        | 152         | ER       | P        | A        | 0.200        | 0.102         | 0.022        | 3.63E-06        |                   | 0.892        |
| A        | 152         | E        | P        | A        | 0.188        | 0.102         | 0.022        | 3.66E-06        |                   | 0.949        |
| A        | 152         | AV       | P        | A        | 0.791        | -0.096        | 0.021        | 6.52E-06        |                   | 0.946        |
| A        | 161         |          | D        | E        | 0.146        | 0.116         | 0.024        | 1.34E-06        |                   | 0.999        |
| <b>B</b> | <b>9</b>    | <b>D</b> | <b>P</b> | <b>A</b> | <b>0.146</b> | <b>-0.146</b> | <b>0.024</b> | <b>1.77E-09</b> |                   | <b>0.999</b> |
| B        | 67          | F        | P        | A        | 0.246        | -0.100        | 0.021        | 1.22E-06        |                   | 0.881        |
| B        | 67          | FM       | P        | A        | 0.301        | -0.088        | 0.019        | 2.61E-06        |                   | 0.950        |
| B        | 156         | Dx       | P        | A        | 0.287        | -0.108        | 0.024        | 4.91E-06        | 4.46E-03          | 0.529        |
| B        | 156         | DW       | P        | A        | 0.311        | -0.104        | 0.023        | 6.30E-06        |                   | 0.529        |
| B        | 156         | D        | P        | A        | 0.268        | -0.103        | 0.023        | 8.21E-06        |                   | 0.587        |
| B        | 156         | RL       | P        | A        | 0.670        | 0.094         | 0.022        | 1.72E-05        |                   | 0.579        |
| DPB1     | 11          |          | L        | G        | 0.216        | 0.099         | 0.020        | 8.78E-07        |                   | 0.994        |
| DQA1     | 26          |          | S        | T        | 0.204        | 0.111         | 0.021        | 7.51E-08        |                   | 0.980        |
| DQA1     | 34          |          | E        | Q        | 0.484        | 0.083         | 0.017        | 6.65E-07        |                   | 0.989        |
| DQA1     | 40          |          | G        | E        | 0.264        | -0.083        | 0.019        | 1.59E-05        |                   | 0.995        |
| DQA1     | 47          | Q        | P        | A        | 0.204        | 0.111         | 0.021        | 7.51E-08        | 2.87E-08          | 0.980        |
| DQA1     | 47          | RC       | P        | A        | 0.660        | -0.094        | 0.017        | 8.11E-08        |                   | 0.996        |
| DQA1     | 47          | C        | P        | A        | 0.264        | -0.083        | 0.019        | 1.59E-05        |                   | 0.996        |
| DQA1     | 50          | L        | P        | A        | 0.340        | 0.094         | 0.017        | 8.15E-08        |                   | 0.996        |
| DQA1     | 50          | V        | P        | A        | 0.264        | -0.083        | 0.019        | 1.59E-05        |                   | 0.995        |
| DQA1     | 51          |          | L        | F        | 0.264        | -0.083        | 0.019        | 1.59E-05        |                   | 0.996        |
| DQA1     | 53          | R        | P        | A        | 0.340        | 0.094         | 0.017        | 8.15E-08        |                   | 0.996        |
| DQA1     | 53          | Q        | P        | A        | 0.264        | -0.083        | 0.019        | 1.59E-05        |                   | 0.995        |
| DQA1     | 56          | R        | P        | A        | 0.204        | 0.111         | 0.021        | 7.51E-08        |                   | 0.980        |
| DQA1     | 75          |          | S        | I        | 0.240        | -0.090        | 0.020        | 6.28E-06        |                   | 0.995        |
| DQA1     | 76          | V        | P        | A        | 0.204        | 0.111         | 0.021        | 7.51E-08        |                   | 0.980        |
| DQA1     | 107         | I        | P        | A        | 0.240        | -0.090        | 0.020        | 6.26E-06        |                   | 0.995        |
| DQA1     | 107         | T        | P        | A        | 0.758        | 0.089         | 0.020        | 7.09E-06        |                   | 0.986        |
| DQA1     | 156         | F        | P        | A        | 0.760        | 0.090         | 0.020        | 6.18E-06        |                   | 0.994        |
| DQA1     | 156         | L        | P        | A        | 0.240        | -0.090        | 0.020        | 6.19E-06        |                   | 0.994        |
| DQA1     | 161         | E        | P        | A        | 0.240        | -0.090        | 0.020        | 6.21E-06        |                   | 0.994        |

|      |     |    |   |   |       |        |       |          |          |       |
|------|-----|----|---|---|-------|--------|-------|----------|----------|-------|
| DQA1 | 161 | D  | P | A | 0.760 | 0.090  | 0.020 | 6.22E-06 |          | 0.995 |
| DQA1 | 163 | S  | P | A | 0.240 | -0.090 | 0.020 | 6.22E-06 |          | 0.995 |
| DQA1 | 163 | I  | P | A | 0.760 | 0.090  | 0.020 | 6.23E-06 |          | 0.994 |
| DQA1 | 175 | QK | P | A | 0.636 | -0.093 | 0.017 | 8.16E-08 |          | 0.996 |
| DQA1 | 175 | E  | P | A | 0.364 | 0.093  | 0.017 | 8.17E-08 | 3.63E-08 | 0.996 |
| DQA1 | 175 | QE | P | A | 0.760 | 0.090  | 0.020 | 6.01E-06 |          | 0.995 |
| DQA1 | 175 | K  | P | A | 0.240 | -0.090 | 0.020 | 6.20E-06 |          | 0.995 |
| DQA1 | 187 | T  | P | A | 0.206 | 0.114  | 0.021 | 3.26E-08 |          | 0.971 |
| DQA1 | 187 | A  | P | A | 0.795 | -0.112 | 0.021 | 5.58E-08 |          | 0.971 |
| DQA1 | 215 | L  | P | A | 0.339 | 0.093  | 0.018 | 1.24E-07 |          | 0.996 |
| DQA1 | 215 | F  | P | A | 0.661 | -0.093 | 0.018 | 1.24E-07 |          | 0.996 |
| DQB1 | -10 | A  | P | A | 0.714 | 0.099  | 0.019 | 1.74E-07 |          | 0.974 |
| DQB1 | -10 | S  | P | A | 0.254 | -0.098 | 0.019 | 5.23E-07 |          | 0.999 |
| DQB1 | 13  | A  | P | A | 0.180 | 0.096  | 0.022 | 1.37E-05 |          | 0.984 |
| DQB1 | 13  | G  | P | A | 0.820 | -0.096 | 0.022 | 1.37E-05 |          | 0.985 |
| DQB1 | 26  | Y  | P | A | 0.180 | 0.096  | 0.022 | 1.38E-05 |          | 0.985 |
| DQB1 | 28  |    | S | T | 0.254 | -0.098 | 0.019 | 5.25E-07 |          | 1.000 |
| DQB1 | 30  | S  | P | A | 0.254 | -0.098 | 0.019 | 5.25E-07 |          | 1.000 |
| DQB1 | 30  | Y  | P | A | 0.500 | 0.078  | 0.017 | 6.24E-06 |          | 0.939 |
| DQB1 | 37  | Y  | P | A | 0.743 | 0.100  | 0.019 | 2.92E-07 |          | 0.999 |
| DQB1 | 37  | I  | P | A | 0.254 | -0.098 | 0.019 | 5.25E-07 |          | 1.000 |
| DQB1 | 38  |    | V | A | 0.409 | -0.080 | 0.017 | 2.63E-06 |          | 0.996 |
| DQB1 | 45  |    | E | G | 0.177 | 0.100  | 0.022 | 6.01E-06 |          | 0.985 |
| DQB1 | 46  |    | E | V | 0.254 | -0.098 | 0.019 | 5.25E-07 |          | 0.999 |
| DQB1 | 47  |    | F | Y | 0.254 | -0.098 | 0.019 | 5.25E-07 |          | 0.999 |
| DQB1 | 52  |    | L | P | 0.254 | -0.098 | 0.019 | 5.26E-07 |          | 0.999 |
| DQB1 | 55  | P  | P | A | 0.329 | 0.105  | 0.018 | 3.61E-09 |          | 0.997 |
| DQB1 | 55  | L  | P | A | 0.254 | -0.098 | 0.019 | 5.26E-07 |          | 0.999 |
| DQB1 | 66  |    | D | E | 0.281 | -0.093 | 0.019 | 7.71E-07 |          | 0.998 |
| DQB1 | 67  |    | I | V | 0.281 | -0.093 | 0.019 | 7.69E-07 |          | 0.998 |
| DQB1 | 71  | K  | P | A | 0.254 | -0.098 | 0.019 | 5.26E-07 |          | 0.999 |
| DQB1 | 71  | KD | P | A | 0.278 | -0.092 | 0.019 | 1.36E-06 | 4.61E-06 | 0.998 |
| DQB1 | 71  | KA | P | A | 0.404 | -0.077 | 0.017 | 6.43E-06 |          | 0.996 |
| DQB1 | 71  | T  | P | A | 0.572 | 0.075  | 0.017 | 9.15E-06 |          | 0.995 |
| DQB1 | 74  | A  | P | A | 0.254 | -0.098 | 0.019 | 5.26E-07 |          | 0.999 |
| DQB1 | 74  | E  | P | A | 0.572 | 0.075  | 0.017 | 9.17E-06 |          | 0.995 |
| DQB1 | 75  |    | V | L | 0.428 | -0.075 | 0.017 | 9.20E-06 |          | 0.995 |
| DQB1 | 77  |    | R | T | 0.406 | -0.078 | 0.017 | 4.46E-06 |          | 0.995 |
| DQB1 | 140 | T  | P | A | 0.350 | 0.104  | 0.018 | 2.85E-09 |          | 0.997 |
| DQB1 | 140 | A  | P | A | 0.648 | -0.103 | 0.018 | 4.56E-09 |          | 0.996 |

|      |     |     |   |   |       |        |       |          |                 |       |
|------|-----|-----|---|---|-------|--------|-------|----------|-----------------|-------|
| DQB1 | 167 | H   | P | A | 0.181 | 0.091  | 0.022 | 3.43E-05 |                 | 0.988 |
| DQB1 | 182 | N   | P | A | 0.350 | 0.104  | 0.018 | 2.85E-09 |                 | 0.997 |
| DQB1 | 182 | S   | P | A | 0.648 | -0.103 | 0.018 | 4.57E-09 |                 | 0.997 |
| DRB1 | 9   | K   | P | A | 0.012 | 0.404  | 0.073 | 3.25E-08 |                 | 1.000 |
| DRB1 | 11  | D   | P | A | 0.012 | 0.404  | 0.073 | 3.25E-08 |                 | 1.000 |
| DRB1 | 11  | SP  | P | A | 0.650 | -0.095 | 0.017 | 4.84E-08 |                 | 0.986 |
| DRB1 | 11  | SPL | P | A | 0.655 | -0.095 | 0.017 | 5.54E-08 |                 | 0.999 |
| DRB1 | 11  | VD  | P | A | 0.206 | 0.108  | 0.020 | 1.12E-07 | <b>1.71E-10</b> | 0.999 |
| DRB1 | 11  | SPG | P | A | 0.788 | -0.108 | 0.020 | 1.14E-07 |                 | 0.981 |
| DRB1 | 11  | LD  | P | A | 0.018 | 0.321  | 0.065 | 7.10E-07 |                 | 0.825 |
| DRB1 | 11  | SPD | P | A | 0.662 | -0.073 | 0.018 | 3.05E-05 |                 | 0.986 |
| DRB1 | 11  | VG  | P | A | 0.332 | 0.073  | 0.018 | 3.34E-05 |                 | 0.999 |
| DRB1 | 13  | SRG | P | A | 0.650 | -0.095 | 0.017 | 4.84E-08 |                 | 0.986 |
| DRB1 | 13  | HF  | P | A | 0.212 | 0.108  | 0.020 | 1.14E-07 |                 | 0.981 |
| DRB1 | 13  | SR  | P | A | 0.602 | -0.090 | 0.017 | 2.56E-07 | 2.44E-07        | 0.940 |
| DRB1 | 13  | F   | P | A | 0.023 | 0.271  | 0.057 | 1.69E-06 |                 | 0.863 |
| DRB1 | 13  | SRY | P | A | 0.740 | -0.093 | 0.019 | 1.93E-06 |                 | 0.926 |
| DRB1 | 28  | H   | P | A | 0.012 | 0.404  | 0.073 | 3.25E-08 |                 | 1.000 |
| DRB1 | 30  | G   | P | A | 0.012 | 0.404  | 0.073 | 3.25E-08 |                 | 1.000 |
| DRB1 | 30  | GR  | P | A | 0.018 | 0.319  | 0.062 | 2.40E-07 | 6.80E-07        | 0.999 |
| DRB1 | 30  | CG  | P | A | 0.018 | 0.321  | 0.065 | 7.10E-07 |                 | 0.825 |
| DRB1 | 30  | YLH | P | A | 0.977 | -0.271 | 0.057 | 1.69E-06 |                 | 0.863 |
| DRB1 | 31  | I   | P | A | 0.018 | 0.321  | 0.065 | 7.10E-07 |                 | 0.825 |
| DRB1 | 31  | F   | P | A | 0.977 | -0.271 | 0.057 | 1.69E-06 |                 | 0.863 |
| DRB1 | 37  | YF  | P | A | 0.455 | 0.081  | 0.019 | 2.95E-05 |                 | 0.703 |
| DRB1 | 47  |     | F | Y | 0.545 | -0.105 | 0.019 | 3.78E-08 |                 | 0.750 |
| DRB1 | 70  | R   | P | A | 0.033 | 0.245  | 0.057 | 1.88E-05 |                 | 0.606 |
| DRB1 | 71  | KR  | P | A | 0.632 | 0.096  | 0.023 | 2.92E-05 |                 | 0.478 |
| DRB1 | 74  | E   | P | A | 0.042 | 0.342  | 0.065 | 1.78E-07 |                 | 0.350 |
| DRB1 | 86  |     | V | G | 0.477 | -0.138 | 0.025 | 4.72E-08 |                 | 0.364 |
| DRB1 | 98  | K   | P | A | 0.648 | -0.097 | 0.018 | 5.41E-08 |                 | 0.946 |
| DRB1 | 98  | E   | P | A | 0.339 | 0.092  | 0.017 | 1.40E-07 |                 | 0.998 |
| DRB1 | 104 | S   | P | A | 0.638 | -0.100 | 0.018 | 2.70E-08 |                 | 0.906 |
| DRB1 | 104 | A   | P | A | 0.339 | 0.092  | 0.017 | 1.40E-07 |                 | 0.998 |
| DRB1 | 149 | H   | P | A | 0.449 | -0.076 | 0.018 | 2.17E-05 |                 | 0.837 |
| DRB1 | 180 | V   | P | A | 0.752 | -0.087 | 0.021 | 3.91E-05 |                 | 0.780 |
| DRB1 | 233 | R   | P | A | 0.335 | -0.092 | 0.018 | 4.85E-07 |                 | 0.954 |
| DRB1 | 233 | T   | P | A | 0.626 | 0.083  | 0.018 | 2.06E-06 |                 | 0.985 |

**Table S23:** Associations for HLA amino acid (AA) sequence substitutions that were significantly associated ( $P < 4.6 \times 10^{-5}$ ) with seroreactivity to VZV. At each position that contained a significant allele and >2 possible substitutions, we tested all possible common (frequency  $\geq 0.01$ ) haplotypes constructed from all well-imputed (INFO > 0.30) amino acid residues at that position using the haplotype omnibus test ( $P_{\text{omni}}$ ) in PLINK 1.07. Variants and haplotypes with the lowest p-value are indicated in bold and shaded.

| Gene | AA position | AA | A1 | A2 | FRQ   | BETA   | SE    | P        | $P_{\text{omni}}$ | INFO  |
|------|-------------|----|----|----|-------|--------|-------|----------|-------------------|-------|
| A    | -15         | L  | P  | A  | 0.536 | 0.100  | 0.016 | 1.46E-09 |                   | 0.998 |
| A    | -15         | V  | P  | A  | 0.462 | -0.099 | 0.017 | 1.93E-09 |                   | 0.993 |
| A    | 44          |    | K  | R  | 0.197 | 0.182  | 0.021 | 1.05E-18 |                   | 0.999 |
| A    | 62          | Q  | P  | A  | 0.479 | 0.119  | 0.017 | 1.17E-12 | 2.04E-10          | 0.957 |
| A    | 62          | QE | P  | A  | 0.575 | 0.112  | 0.017 | 4.12E-11 |                   | 0.956 |
| A    | 62          | QR | P  | A  | 0.576 | 0.105  | 0.017 | 2.38E-10 |                   | 0.999 |
| A    | 62          | QL | P  | A  | 0.519 | 0.105  | 0.017 | 3.52E-10 |                   | 0.957 |
| A    | 62          | GL | P  | A  | 0.328 | -0.106 | 0.018 | 1.76E-09 |                   | 0.999 |
| A    | 62          | GR | P  | A  | 0.386 | -0.101 | 0.017 | 5.44E-09 |                   | 0.954 |
| A    | 62          | GE | P  | A  | 0.384 | -0.094 | 0.017 | 2.50E-08 |                   | 0.999 |
| A    | 62          | G  | P  | A  | 0.289 | -0.099 | 0.018 | 7.48E-08 |                   | 0.999 |
| A    | 66          |    | K  | N  | 0.388 | -0.097 | 0.017 | 1.31E-08 |                   | 0.982 |
| A    | 67          |    | M  | V  | 0.197 | 0.182  | 0.021 | 1.18E-18 |                   | 0.999 |
| A    | 74          | D  | P  | A  | 0.714 | 0.100  | 0.019 | 6.10E-08 |                   | 0.983 |
| A    | 74          | H  | P  | A  | 0.286 | -0.100 | 0.019 | 6.98E-08 |                   | 0.983 |
| A    | 76          | A  | P  | A  | 0.258 | 0.135  | 0.019 | 2.72E-12 |                   | 0.892 |
| A    | 76          | V  | P  | A  | 0.589 | -0.101 | 0.017 | 4.56E-09 |                   | 0.918 |
| A    | 77          | N  | P  | A  | 0.366 | 0.105  | 0.018 | 2.62E-09 |                   | 0.872 |
| A    | 77          | D  | P  | A  | 0.589 | -0.101 | 0.017 | 4.56E-09 |                   | 0.918 |
| A    | 90          |    | D  | A  | 0.301 | 0.127  | 0.018 | 1.57E-12 |                   | 0.997 |
| A    | 95          | I  | P  | A  | 0.616 | 0.095  | 0.017 | 2.14E-08 |                   | 0.996 |
| A    | 95          | V  | P  | A  | 0.272 | -0.106 | 0.019 | 5.85E-08 |                   | 0.916 |
| A    | 97          | IK | P  | A  | 0.425 | 0.112  | 0.017 | 2.09E-11 | 1.55E-11          | 0.995 |
| A    | 97          | I  | P  | A  | 0.425 | 0.112  | 0.017 | 2.09E-11 |                   | 0.995 |
| A    | 97          | IM | P  | A  | 0.660 | 0.106  | 0.018 | 3.04E-09 |                   | 0.958 |
| A    | 97          | R  | P  | A  | 0.340 | -0.106 | 0.018 | 3.13E-09 |                   | 0.958 |
| A    | 105         |    | P  | S  | 0.343 | 0.127  | 0.017 | 3.42E-13 |                   | 0.963 |
| A    | 107         |    | W  | G  | 0.289 | -0.099 | 0.018 | 5.92E-08 |                   | 0.996 |
| A    | 114         | RE | P  | A  | 0.493 | 0.100  | 0.017 | 2.55E-09 | 5.38E-08          | 0.965 |
| A    | 114         | H  | P  | A  | 0.392 | -0.097 | 0.017 | 1.48E-08 |                   | 0.964 |
| A    | 114         | R  | P  | A  | 0.470 | 0.095  | 0.017 | 1.62E-08 |                   | 0.965 |
| A    | 114         | RQ | P  | A  | 0.586 | 0.089  | 0.017 | 1.25E-07 |                   | 0.964 |
| A    | 116         | Y  | P  | A  | 0.392 | -0.097 | 0.017 | 1.49E-08 |                   | 0.964 |
| A    | 116         | D  | P  | A  | 0.585 | 0.089  | 0.017 | 1.26E-07 |                   | 0.964 |

|   |     |    |   |   |       |        |       |          |       |
|---|-----|----|---|---|-------|--------|-------|----------|-------|
| A | 127 |    | K | N | 0.420 | -0.092 | 0.017 | 3.88E-08 | 0.999 |
| A | 142 |    | T | I | 0.325 | -0.092 | 0.018 | 2.07E-07 | 0.999 |
| A | 145 |    | H | R | 0.324 | -0.092 | 0.018 | 2.05E-07 | 0.999 |
| A | 150 |    | V | A | 0.197 | 0.182  | 0.021 | 1.19E-18 | 0.998 |
| A | 152 | AR | P | A | 0.269 | 0.156  | 0.019 | 1.11E-16 | 0.948 |
| A | 152 | AW | P | A | 0.267 | 0.155  | 0.019 | 1.35E-16 | 0.950 |
| A | 152 | EV | P | A | 0.721 | -0.151 | 0.018 | 1.56E-16 | 0.994 |
| A | 152 | A  | P | A | 0.257 | 0.152  | 0.019 | 5.86E-16 | 0.997 |
| A | 152 | V  | P | A | 0.533 | -0.102 | 0.017 | 1.21E-09 | 0.966 |
| A | 152 | VW | P | A | 0.543 | -0.102 | 0.017 | 1.89E-09 | 0.930 |
| A | 152 | VR | P | A | 0.545 | -0.101 | 0.017 | 2.39E-09 | 0.933 |
| A | 152 | AE | P | A | 0.445 | 0.097  | 0.017 | 7.71E-09 | 0.969 |
| A | 156 | R  | P | A | 0.197 | 0.182  | 0.021 | 1.19E-18 | 0.998 |
| A | 156 | RQ | P | A | 0.345 | 0.128  | 0.018 | 9.15E-13 | 0.923 |
| A | 156 | RW | P | A | 0.296 | 0.133  | 0.019 | 1.80E-12 | 0.901 |
| A | 156 | L  | P | A | 0.556 | -0.109 | 0.018 | 8.53E-10 | 0.851 |
| A | 158 |    | V | A | 0.197 | 0.182  | 0.021 | 1.19E-18 | 0.998 |
| A | 163 | T  | P | A | 0.701 | -0.127 | 0.018 | 2.01E-12 | 0.988 |
| A | 163 | R  | P | A | 0.299 | 0.127  | 0.018 | 2.14E-12 | 0.989 |
| A | 166 |    | D | E | 0.289 | 0.129  | 0.018 | 1.53E-12 | 0.982 |
| A | 167 |    | G | W | 0.289 | 0.129  | 0.018 | 1.52E-12 | 0.982 |
| A | 184 | P  | P | A | 0.558 | 0.100  | 0.017 | 2.13E-09 | 0.998 |
| A | 184 | A  | P | A | 0.442 | -0.100 | 0.017 | 2.20E-09 | 0.998 |
| A | 193 | P  | P | A | 0.521 | 0.100  | 0.017 | 1.38E-09 | 0.999 |
| A | 193 | A  | P | A | 0.479 | -0.100 | 0.017 | 1.41E-09 | 0.999 |
| A | 194 | I  | P | A | 0.521 | 0.100  | 0.017 | 1.38E-09 | 0.999 |
| A | 194 | V  | P | A | 0.479 | -0.100 | 0.017 | 1.41E-09 | 0.999 |
| A | 207 | G  | P | A | 0.521 | 0.100  | 0.017 | 1.45E-09 | 0.999 |
| A | 207 | S  | P | A | 0.479 | -0.100 | 0.017 | 1.46E-09 | 0.999 |
| A | 253 | EK | P | A | 0.521 | 0.101  | 0.017 | 1.26E-09 | 0.999 |
| A | 253 | Q  | P | A | 0.479 | -0.101 | 0.017 | 1.28E-09 | 0.999 |
| A | 253 | Ex | P | A | 0.521 | 0.100  | 0.017 | 1.34E-09 | 0.999 |
| A | 253 | E  | P | A | 0.521 | 0.100  | 0.017 | 1.34E-09 | 0.999 |
| A | 276 | P  | P | A | 0.562 | -0.115 | 0.017 | 9.31E-12 | 0.947 |
| A | 276 | L  | P | A | 0.425 | 0.112  | 0.017 | 1.74E-11 | 0.999 |
| A | 294 | F  | P | A | 0.466 | -0.105 | 0.017 | 5.82E-10 | 0.948 |
| A | 294 | L  | P | A | 0.521 | 0.101  | 0.017 | 1.19E-09 | 0.999 |
| A | 321 | S  | P | A | 0.562 | -0.116 | 0.017 | 8.74E-12 | 0.947 |
| A | 321 | T  | P | A | 0.425 | 0.113  | 0.017 | 1.55E-11 | 0.999 |
| B | -8  | L  | P | A | 0.539 | 0.075  | 0.017 | 7.07E-06 | 0.984 |

|          |          |          |          |          |              |              |              |                 |              |
|----------|----------|----------|----------|----------|--------------|--------------|--------------|-----------------|--------------|
| B        | -8       | V        | P        | A        | 0.459        | -0.075       | 0.017        | 7.12E-06        | 0.977        |
| B        | -10      | G        | P        | A        | 0.554        | -0.088       | 0.017        | 1.86E-07        | 0.975        |
| B        | -10      | A        | P        | A        | 0.444        | 0.087        | 0.017        | 1.87E-07        | 0.984        |
| B        | -11      | S        | P        | A        | 0.516        | 0.076        | 0.017        | 4.31E-06        | 0.984        |
| B        | -11      | W        | P        | A        | 0.482        | -0.076       | 0.017        | 4.32E-06        | 0.976        |
| B        | -21      | M        | P        | A        | 0.362        | 0.097        | 0.017        | 1.55E-08        | 0.992        |
| B        | -21      | T        | P        | A        | 0.635        | -0.097       | 0.017        | 1.56E-08        | 0.983        |
| B        | -23      | L        | P        | A        | 0.361        | 0.097        | 0.017        | 1.57E-08        | 0.998        |
| B        | -23      | R        | P        | A        | 0.637        | -0.097       | 0.017        | 1.58E-08        | 0.989        |
| <b>B</b> | <b>9</b> | <b>D</b> | <b>P</b> | <b>A</b> | <b>0.146</b> | <b>0.237</b> | <b>0.023</b> | <b>9.71E-25</b> | <b>0.999</b> |
| B        | 9        | Y        | P        | A        | 0.663        | -0.124       | 0.017        | 1.24E-12        | 0.986        |
| B        | 24       | S        | P        | A        | 0.416        | 0.100        | 0.017        | 2.19E-09        | 0.982        |
| B        | 24       | T        | P        | A        | 0.333        | -0.077       | 0.017        | 1.06E-05        | 0.988        |
| B        | 32       |          | L        | Q        | 0.313        | -0.077       | 0.018        | 1.35E-05        | 0.988        |
| B        | 45       | E        | P        | A        | 0.443        | 0.080        | 0.017        | 1.70E-06        | 0.966        |
| B        | 45       | EG       | P        | A        | 0.445        | 0.080        | 0.017        | 1.92E-06        | 0.972        |
| B        | 45       | ET       | P        | A        | 0.615        | 0.071        | 0.017        | 2.97E-05        | 0.957        |
| B        | 45       | KM       | P        | A        | 0.383        | -0.071       | 0.017        | 3.26E-05        | 0.963        |
| B        | 45       | EM       | P        | A        | 0.569        | 0.069        | 0.017        | 3.85E-05        | 0.983        |
| B        | 45       | TK       | P        | A        | 0.429        | -0.068       | 0.017        | 4.24E-05        | 0.989        |
| B        | 63       |          | E        | N        | 0.480        | -0.084       | 0.017        | 1.56E-06        | 0.869        |
| B        | 67       | F        | P        | A        | 0.246        | 0.154        | 0.020        | 9.88E-15        | 0.881        |
| B        | 67       | FM       | P        | A        | 0.301        | 0.125        | 0.018        | 5.18E-12        | 0.950        |
| B        | 67       | FC       | P        | A        | 0.371        | 0.112        | 0.018        | 4.75E-10        | 0.875        |
| B        | 67       | YS       | P        | A        | 0.573        | -0.099       | 0.017        | 6.25E-09        | 0.932        |
| B        | 67       | YF       | P        | A        | 0.416        | 0.083        | 0.018        | 2.33E-06        | 0.873        |
| B        | 67       | SC       | P        | A        | 0.528        | -0.076       | 0.017        | 9.01E-06        | 0.924        |
| B        | 74       |          | D        | Y        | 0.409        | 0.089        | 0.018        | 5.28E-07        | 0.852        |
| B        | 77       | SG       | P        | A        | 0.613        | 0.089        | 0.020        | 1.17E-05        | 0.613        |
| B        | 77       | S        | P        | A        | 0.612        | 0.088        | 0.020        | 1.29E-05        | 0.613        |
| B        | 77       | N        | P        | A        | 0.321        | -0.094       | 0.022        | 1.36E-05        | 0.574        |
| B        | 77       | SD       | P        | A        | 0.678        | 0.094        | 0.022        | 1.51E-05        | 0.574        |
| B        | 80       | N        | P        | A        | 0.611        | 0.088        | 0.020        | 1.19E-05        | 0.619        |
| B        | 81       |          | A        | L        | 0.321        | -0.094       | 0.022        | 1.36E-05        | 0.574        |
| B        | 82       |          | L        | R        | 0.389        | -0.088       | 0.020        | 1.21E-05        | 0.619        |
| B        | 83       |          | R        | G        | 0.389        | -0.088       | 0.020        | 1.21E-05        | 0.619        |
| B        | 95       | L        | P        | A        | 0.571        | 0.081        | 0.018        | 1.05E-05        | 0.751        |
| B        | 97       | SW       | P        | A        | 0.318        | 0.111        | 0.018        | 1.95E-09        | 0.908        |
| B        | 97       | S        | P        | A        | 0.313        | 0.110        | 0.018        | 2.37E-09        | 0.926        |
| B        | 97       | SV       | P        | A        | 0.350        | 0.106        | 0.018        | 3.60E-09        | 0.924        |

|   |     |     |   |   |       |        |       |          |       |
|---|-----|-----|---|---|-------|--------|-------|----------|-------|
| B | 97  | SWV | P | A | 0.355 | 0.106  | 0.018 | 3.61E-09 | 0.919 |
| B | 97  | STV | P | A | 0.461 | 0.094  | 0.018 | 1.74E-07 | 0.782 |
| B | 97  | RN  | P | A | 0.534 | -0.094 | 0.018 | 1.83E-07 | 0.780 |
| B | 97  | STW | P | A | 0.429 | 0.094  | 0.018 | 2.28E-07 | 0.771 |
| B | 97  | ST  | P | A | 0.424 | 0.093  | 0.018 | 2.64E-07 | 0.786 |
| B | 97  | SWN | P | A | 0.374 | 0.089  | 0.018 | 4.74E-07 | 0.907 |
| B | 97  | RT  | P | A | 0.589 | -0.088 | 0.017 | 4.86E-07 | 0.916 |
| B | 97  | SNV | P | A | 0.407 | 0.087  | 0.017 | 5.13E-07 | 0.921 |
| B | 97  | SN  | P | A | 0.369 | 0.088  | 0.018 | 5.89E-07 | 0.927 |
| B | 97  | RW  | P | A | 0.483 | -0.081 | 0.018 | 7.41E-06 | 0.779 |
| B | 97  | R   | P | A | 0.478 | -0.080 | 0.018 | 7.52E-06 | 0.776 |
| B | 97  | RV  | P | A | 0.515 | -0.079 | 0.018 | 1.17E-05 | 0.771 |
| B | 97  | STN | P | A | 0.480 | 0.078  | 0.018 | 1.34E-05 | 0.787 |
| B | 113 | H   | P | A | 0.712 | 0.083  | 0.020 | 2.75E-05 | 0.798 |
| B | 114 | Nx  | P | A | 0.472 | 0.174  | 0.023 | 4.00E-14 | 0.454 |
| B | 114 | DH  | P | A | 0.528 | -0.174 | 0.023 | 4.07E-14 | 0.454 |
| B | 114 | N   | P | A | 0.453 | 0.162  | 0.022 | 1.50E-13 | 0.504 |
| B | 114 | NK  | P | A | 0.453 | 0.162  | 0.022 | 1.50E-13 | 0.504 |
| B | 114 | D   | P | A | 0.467 | -0.151 | 0.023 | 4.53E-11 | 0.458 |
| B | 114 | DK  | P | A | 0.467 | -0.151 | 0.023 | 4.53E-11 | 0.458 |
| B | 114 | Dx  | P | A | 0.486 | -0.141 | 0.022 | 1.27E-10 | 0.509 |
| B | 114 | NH  | P | A | 0.514 | 0.141  | 0.022 | 1.28E-10 | 0.509 |
| B | 116 | YFx | P | A | 0.550 | 0.109  | 0.020 | 4.50E-08 | 0.617 |
| B | 116 | YF  | P | A | 0.532 | 0.103  | 0.019 | 6.86E-08 | 0.677 |
| B | 116 | DS  | P | A | 0.376 | -0.110 | 0.022 | 8.01E-07 | 0.512 |
| B | 116 | Y   | P | A | 0.431 | 0.088  | 0.018 | 1.45E-06 | 0.808 |
| B | 116 | YFL | P | A | 0.606 | 0.101  | 0.021 | 1.49E-06 | 0.572 |
| B | 116 | Yx  | P | A | 0.450 | 0.090  | 0.019 | 1.54E-06 | 0.743 |
| B | 116 | YFS | P | A | 0.707 | 0.094  | 0.020 | 2.15E-06 | 0.769 |
| B | 116 | DL  | P | A | 0.275 | -0.089 | 0.020 | 5.74E-06 | 0.843 |
| B | 116 | Dx  | P | A | 0.219 | -0.109 | 0.024 | 6.85E-06 | 0.596 |
| B | 116 | YS  | P | A | 0.606 | 0.089  | 0.020 | 8.71E-06 | 0.648 |
| B | 116 | D   | P | A | 0.201 | -0.103 | 0.024 | 1.82E-05 | 0.675 |
| B | 116 | YSx | P | A | 0.625 | 0.082  | 0.020 | 2.73E-05 | 0.707 |
| B | 131 | R   | P | A | 0.364 | 0.099  | 0.018 | 4.31E-08 | 0.876 |
| B | 131 | S   | P | A | 0.617 | -0.101 | 0.019 | 4.78E-08 | 0.804 |
| B | 152 | E   | P | A | 0.292 | -0.115 | 0.025 | 4.19E-06 | 0.484 |
| B | 152 | V   | P | A | 0.689 | 0.100  | 0.023 | 1.11E-05 | 0.559 |
| B | 156 | D   | P | A | 0.268 | 0.177  | 0.022 | 1.94E-15 | 0.587 |
| B | 156 | Dx  | P | A | 0.287 | 0.180  | 0.023 | 2.45E-15 | 0.529 |

|   |     |    |   |   |       |        |       |          |          |       |
|---|-----|----|---|---|-------|--------|-------|----------|----------|-------|
| B | 156 | DW | P | A | 0.311 | 0.168  | 0.022 | 3.54E-14 |          | 0.529 |
| B | 156 | RL | P | A | 0.670 | -0.148 | 0.021 | 2.19E-12 |          | 0.579 |
| B | 156 | LW | P | A | 0.572 | -0.118 | 0.022 | 4.31E-08 |          | 0.501 |
| B | 156 | RD | P | A | 0.410 | 0.114  | 0.021 | 4.67E-08 |          | 0.554 |
| B | 156 | Lx | P | A | 0.547 | -0.115 | 0.022 | 1.05E-07 |          | 0.485 |
| B | 156 | L  | P | A | 0.529 | -0.104 | 0.021 | 6.35E-07 |          | 0.526 |
| B | 163 | T  | P | A | 0.280 | 0.172  | 0.019 | 5.20E-19 |          | 0.881 |
| B | 163 | EL | P | A | 0.701 | -0.174 | 0.019 | 6.40E-19 | 1.62E-16 | 0.804 |
| B | 163 | L  | P | A | 0.415 | -0.090 | 0.018 | 6.28E-07 |          | 0.801 |
| B | 163 | ET | P | A | 0.567 | 0.086  | 0.017 | 8.10E-07 |          | 0.871 |
| B | 167 | W  | P | A | 0.830 | 0.114  | 0.027 | 2.82E-05 |          | 0.588 |
| B | 177 | D  | P | A | 0.363 | 0.099  | 0.018 | 4.70E-08 |          | 0.877 |
| B | 177 | E  | P | A | 0.619 | -0.101 | 0.018 | 5.33E-08 |          | 0.804 |
| B | 180 | E  | P | A | 0.363 | 0.099  | 0.018 | 4.70E-08 |          | 0.877 |
| B | 180 | Q  | P | A | 0.619 | -0.101 | 0.018 | 5.33E-08 |          | 0.804 |
| B | 199 | A  | P | A | 0.837 | 0.121  | 0.029 | 2.48E-05 |          | 0.536 |
| C | -9  | G  | P | A | 0.357 | 0.085  | 0.017 | 6.90E-07 |          | 1.000 |
| C | -9  | A  | P | A | 0.643 | -0.085 | 0.017 | 7.07E-07 |          | 0.998 |
| C | -15 | L  | P | A | 0.419 | 0.076  | 0.017 | 6.86E-06 |          | 1.000 |
| C | -15 | I  | P | A | 0.580 | -0.076 | 0.017 | 6.99E-06 |          | 0.997 |
| C | -17 | A  | P | A | 0.363 | 0.090  | 0.017 | 1.34E-07 |          | 1.000 |
| C | -17 | T  | P | A | 0.637 | -0.090 | 0.017 | 1.37E-07 |          | 0.998 |
| C | 9   | D  | P | A | 0.446 | 0.081  | 0.017 | 1.01E-06 |          | 0.999 |
| C | 9   | DF | P | A | 0.480 | 0.079  | 0.016 | 1.50E-06 |          | 0.999 |
| C | 24  |    | S | A | 0.480 | 0.079  | 0.016 | 1.51E-06 |          | 0.999 |
| C | 66  |    | N | K | 0.201 | 0.176  | 0.020 | 6.87E-18 |          | 0.998 |
| C | 116 | S  | P | A | 0.571 | 0.071  | 0.017 | 3.50E-05 |          | 0.939 |
| C | 147 |    | L | W | 0.363 | 0.090  | 0.017 | 1.44E-07 |          | 0.999 |
| C | 152 | A  | P | A | 0.403 | 0.075  | 0.017 | 7.25E-06 |          | 0.999 |
| C | 152 | E  | P | A | 0.586 | -0.077 | 0.017 | 7.72E-06 |          | 0.954 |
| C | 184 | PR | P | A | 0.363 | 0.090  | 0.017 | 1.48E-07 |          | 0.999 |
| C | 184 | H  | P | A | 0.637 | -0.090 | 0.017 | 1.49E-07 | 1.37E-07 | 0.999 |
| C | 184 | P  | P | A | 0.357 | 0.085  | 0.017 | 7.56E-07 |          | 0.999 |
| C | 184 | Px | P | A | 0.357 | 0.085  | 0.017 | 7.64E-07 |          | 0.999 |
| C | 194 | V  | P | A | 0.643 | -0.085 | 0.017 | 7.64E-07 |          | 0.999 |
| C | 194 | L  | P | A | 0.357 | 0.085  | 0.017 | 7.66E-07 |          | 1.000 |
| C | 253 | Q  | P | A | 0.363 | 0.090  | 0.017 | 1.61E-07 |          | 0.999 |
| C | 253 | E  | P | A | 0.637 | -0.090 | 0.017 | 1.63E-07 |          | 0.997 |
| C | 261 | M  | P | A | 0.357 | 0.085  | 0.017 | 8.22E-07 |          | 0.999 |
| C | 261 | V  | P | A | 0.643 | -0.085 | 0.017 | 8.31E-07 |          | 0.997 |



|      |     |    |   |   |       |        |       |          |       |
|------|-----|----|---|---|-------|--------|-------|----------|-------|
| C    | 267 | Q  | P | A | 0.363 | 0.090  | 0.017 | 1.61E-07 | 0.999 |
| C    | 267 | P  | P | A | 0.637 | -0.090 | 0.017 | 1.85E-07 | 0.996 |
| C    | 273 | S  | P | A | 0.357 | 0.085  | 0.017 | 8.21E-07 | 0.999 |
| C    | 273 | R  | P | A | 0.643 | -0.084 | 0.017 | 9.36E-07 | 0.996 |
| C    | 285 | ML | P | A | 0.362 | 0.090  | 0.017 | 1.61E-07 | 0.998 |
| C    | 285 | V  | P | A | 0.637 | -0.089 | 0.017 | 1.87E-07 | 0.996 |
| C    | 285 | M  | P | A | 0.357 | 0.085  | 0.017 | 8.17E-07 | 0.999 |
| C    | 285 | Mx | P | A | 0.357 | 0.084  | 0.017 | 9.45E-07 | 0.996 |
| C    | 295 | V  | P | A | 0.357 | 0.085  | 0.017 | 8.47E-07 | 0.994 |
| C    | 295 | A  | P | A | 0.642 | -0.084 | 0.017 | 9.80E-07 | 0.992 |
| C    | 305 | T  | P | A | 0.356 | 0.084  | 0.017 | 9.90E-07 | 0.998 |
| C    | 305 | A  | P | A | 0.643 | -0.084 | 0.017 | 1.16E-06 | 0.996 |
| C    | 306 | A  | P | A | 0.362 | 0.089  | 0.017 | 1.96E-07 | 0.998 |
| C    | 306 | V  | P | A | 0.637 | -0.089 | 0.017 | 2.31E-07 | 0.996 |
| C    | 307 | M  | P | A | 0.357 | 0.084  | 0.017 | 9.85E-07 | 0.998 |
| C    | 307 | V  | P | A | 0.643 | -0.084 | 0.017 | 1.16E-06 | 0.996 |
| C    | 326 | C  | P | A | 0.357 | 0.084  | 0.017 | 9.86E-07 | 0.999 |
| C    | 326 | S  | P | A | 0.642 | -0.084 | 0.017 | 1.07E-06 | 0.995 |
| C    | 339 | T  | P | A | 0.357 | 0.084  | 0.017 | 1.00E-06 | 0.999 |
| C    | 339 | A  | P | A | 0.642 | -0.084 | 0.017 | 1.07E-06 | 0.995 |
| DQA1 | -16 | L  | P | A | 0.420 | -0.080 | 0.017 | 2.01E-06 | 0.999 |
| DQA1 | -16 | M  | P | A | 0.580 | 0.079  | 0.017 | 2.21E-06 | 0.998 |
| DQA1 | 11  | Y  | P | A | 0.604 | 0.096  | 0.017 | 1.65E-08 | 0.999 |
| DQA1 | 11  | C  | P | A | 0.396 | -0.096 | 0.017 | 1.65E-08 | 0.999 |
| DQA1 | 18  |    | F | S | 0.396 | -0.096 | 0.017 | 1.65E-08 | 0.999 |
| DQA1 | 40  |    | G | E | 0.264 | 0.148  | 0.019 | 1.79E-15 | 0.995 |
| DQA1 | 41  |    | K | R | 0.171 | -0.126 | 0.024 | 1.28E-07 | 0.816 |
| DQA1 | 45  |    | A | V | 0.396 | -0.096 | 0.017 | 1.65E-08 | 0.999 |
| DQA1 | 47  | C  | P | A | 0.264 | 0.148  | 0.019 | 1.79E-15 | 0.996 |
| DQA1 | 47  | RQ | P | A | 0.600 | -0.126 | 0.017 | 1.06E-13 | 0.986 |
| DQA1 | 47  | R  | P | A | 0.395 | -0.096 | 0.017 | 1.68E-08 | 0.997 |
| DQA1 | 47  | RK | P | A | 0.531 | -0.089 | 0.017 | 8.77E-08 | 0.988 |
| DQA1 | 48  |    | W | L | 0.396 | -0.096 | 0.017 | 1.63E-08 | 0.999 |
| DQA1 | 50  | V  | P | A | 0.264 | 0.148  | 0.019 | 1.78E-15 | 0.995 |
| DQA1 | 50  | E  | P | A | 0.396 | -0.096 | 0.017 | 1.66E-08 | 0.998 |
| DQA1 | 51  |    | L | F | 0.264 | 0.148  | 0.019 | 1.79E-15 | 0.996 |
| DQA1 | 52  | S  | P | A | 0.396 | -0.096 | 0.017 | 1.65E-08 | 0.999 |
| DQA1 | 52  | R  | P | A | 0.468 | 0.089  | 0.017 | 8.57E-08 | 0.989 |
| DQA1 | 53  | Q  | P | A | 0.264 | 0.148  | 0.019 | 1.78E-15 | 0.995 |
| DQA1 | 53  | K  | P | A | 0.396 | -0.096 | 0.017 | 1.63E-08 | 0.999 |

|      |     |    |   |   |       |        |       |          |       |
|------|-----|----|---|---|-------|--------|-------|----------|-------|
| DQA1 | 55  |    | G | R | 0.396 | -0.096 | 0.017 | 1.66E-08 | 0.998 |
| DQA1 | 56  | x  | P | A | 0.400 | 0.126  | 0.017 | 1.08E-13 | 0.985 |
| DQA1 | 56  | G  | P | A | 0.396 | -0.096 | 0.017 | 1.66E-08 | 0.998 |
| DQA1 | 61  |    | G | F | 0.396 | -0.096 | 0.017 | 1.63E-08 | 0.999 |
| DQA1 | 64  |    | R | T | 0.396 | -0.096 | 0.017 | 1.66E-08 | 0.998 |
| DQA1 | 66  |    | M | I | 0.396 | -0.096 | 0.017 | 1.63E-08 | 0.999 |
| DQA1 | 69  | A  | P | A | 0.396 | -0.096 | 0.017 | 1.63E-08 | 0.999 |
| DQA1 | 69  | L  | P | A | 0.580 | 0.080  | 0.017 | 1.86E-06 | 0.998 |
| DQA1 | 75  |    | S | I | 0.240 | 0.140  | 0.019 | 3.07E-13 | 0.995 |
| DQA1 | 76  | L  | P | A | 0.400 | 0.126  | 0.017 | 1.08E-13 | 0.985 |
| DQA1 | 76  | M  | P | A | 0.396 | -0.096 | 0.017 | 1.65E-08 | 0.998 |
| DQA1 | 80  |    | Y | S | 0.396 | -0.096 | 0.017 | 1.63E-08 | 0.999 |
| DQA1 | 107 | T  | P | A | 0.758 | -0.141 | 0.019 | 2.35E-13 | 0.986 |
| DQA1 | 107 | I  | P | A | 0.240 | 0.140  | 0.019 | 3.05E-13 | 0.995 |
| DQA1 | 130 | A  | P | A | 0.172 | -0.126 | 0.024 | 1.25E-07 | 0.818 |
| DQA1 | 130 | S  | P | A | 0.829 | 0.126  | 0.024 | 1.26E-07 | 0.817 |
| DQA1 | 156 | L  | P | A | 0.240 | 0.140  | 0.019 | 3.00E-13 | 0.994 |
| DQA1 | 156 | F  | P | A | 0.760 | -0.140 | 0.019 | 3.04E-13 | 0.994 |
| DQA1 | 161 | D  | P | A | 0.760 | -0.140 | 0.019 | 2.99E-13 | 0.995 |
| DQA1 | 161 | E  | P | A | 0.240 | 0.140  | 0.019 | 3.01E-13 | 0.994 |
| DQA1 | 163 | I  | P | A | 0.760 | -0.140 | 0.019 | 3.02E-13 | 0.994 |
| DQA1 | 163 | S  | P | A | 0.240 | 0.140  | 0.019 | 3.02E-13 | 0.995 |
| DQA1 | 175 | QE | P | A | 0.760 | -0.140 | 0.019 | 2.91E-13 | 0.995 |
| DQA1 | 175 | K  | P | A | 0.240 | 0.140  | 0.019 | 3.01E-13 | 0.995 |
| DQA1 | 175 | Qx | P | A | 0.396 | -0.096 | 0.017 | 1.56E-08 | 0.999 |
| DQA1 | 175 | Q  | P | A | 0.396 | -0.096 | 0.017 | 1.58E-08 | 0.999 |
| DQA1 | 218 | R  | P | A | 0.603 | 0.097  | 0.017 | 1.28E-08 | 0.999 |
| DQA1 | 218 | Q  | P | A | 0.397 | -0.096 | 0.017 | 1.32E-08 | 0.999 |
| DQB1 | -4  | V  | P | A | 0.607 | 0.095  | 0.017 | 2.05E-08 | 0.997 |
| DQB1 | -4  | L  | P | A | 0.361 | -0.098 | 0.017 | 2.07E-08 | 0.976 |
| DQB1 | -5  | P  | P | A | 0.607 | 0.095  | 0.017 | 2.05E-08 | 0.996 |
| DQB1 | -5  | Px | P | A | 0.639 | 0.098  | 0.017 | 2.08E-08 | 0.976 |
| DQB1 | -5  | L  | P | A | 0.211 | -0.105 | 0.020 | 2.17E-07 | 0.970 |
| DQB1 | -5  | PS | P | A | 0.757 | 0.096  | 0.019 | 4.85E-07 | 0.997 |
| DQB1 | -6  | TA | P | A | 0.607 | 0.095  | 0.017 | 2.06E-08 | 0.996 |
| DQB1 | -6  | S  | P | A | 0.361 | -0.098 | 0.017 | 2.07E-08 | 0.976 |
| DQB1 | -6  | T  | P | A | 0.605 | 0.095  | 0.017 | 2.88E-08 | 0.988 |
| DQB1 | -6  | Tx | P | A | 0.637 | 0.097  | 0.018 | 2.97E-08 | 0.967 |
| DQB1 | -10 | S  | P | A | 0.254 | 0.161  | 0.019 | 1.30E-17 | 0.999 |
| DQB1 | -10 | A  | P | A | 0.714 | -0.149 | 0.018 | 4.41E-16 | 0.974 |

|      |     |    |   |   |       |        |       |          |       |
|------|-----|----|---|---|-------|--------|-------|----------|-------|
| DQB1 | -18 | A  | P | A | 0.434 | 0.072  | 0.017 | 1.57E-05 | 0.990 |
| DQB1 | -18 | V  | P | A | 0.534 | -0.069 | 0.017 | 3.17E-05 | 0.971 |
| DQB1 | -21 | G  | P | A | 0.607 | 0.095  | 0.017 | 2.05E-08 | 0.996 |
| DQB1 | -21 | D  | P | A | 0.361 | -0.098 | 0.017 | 2.07E-08 | 0.976 |
| DQB1 | 13  | G  | P | A | 0.820 | 0.091  | 0.022 | 2.71E-05 | 0.985 |
| DQB1 | 13  | A  | P | A | 0.180 | -0.091 | 0.022 | 2.72E-05 | 0.984 |
| DQB1 | 26  | Y  | P | A | 0.180 | -0.091 | 0.022 | 2.72E-05 | 0.985 |
| DQB1 | 28  |    | S | T | 0.254 | 0.161  | 0.019 | 1.36E-17 | 1.000 |
| DQB1 | 30  | S  | P | A | 0.254 | 0.161  | 0.019 | 1.36E-17 | 1.000 |
| DQB1 | 30  | Y  | P | A | 0.500 | -0.097 | 0.017 | 7.39E-09 | 0.939 |
| DQB1 | 37  | I  | P | A | 0.254 | 0.161  | 0.019 | 1.36E-17 | 1.000 |
| DQB1 | 37  | Y  | P | A | 0.743 | -0.157 | 0.019 | 4.54E-17 | 0.999 |
| DQB1 | 38  |    | V | A | 0.409 | 0.106  | 0.017 | 2.28E-10 | 0.996 |
| DQB1 | 45  |    | E | G | 0.177 | -0.090 | 0.022 | 4.02E-05 | 0.985 |
| DQB1 | 46  |    | E | V | 0.254 | 0.161  | 0.019 | 1.35E-17 | 0.999 |
| DQB1 | 47  |    | F | Y | 0.254 | 0.161  | 0.019 | 1.35E-17 | 0.999 |
| DQB1 | 52  |    | L | P | 0.254 | 0.161  | 0.019 | 1.35E-17 | 0.999 |
| DQB1 | 53  |    | Q | L | 0.395 | -0.096 | 0.017 | 1.31E-08 | 0.997 |
| DQB1 | 55  | L  | P | A | 0.254 | 0.161  | 0.019 | 1.35E-17 | 0.999 |
| DQB1 | 55  | R  | P | A | 0.417 | -0.081 | 0.017 | 1.57E-06 | 0.997 |
| DQB1 | 57  | A  | P | A | 0.401 | 0.139  | 0.017 | 3.18E-16 | 0.982 |
| DQB1 | 57  | AS | P | A | 0.411 | 0.134  | 0.017 | 1.74E-15 | 0.981 |
| DQB1 | 57  | AV | P | A | 0.552 | 0.117  | 0.017 | 5.16E-12 | 0.952 |
| DQB1 | 57  | D  | P | A | 0.438 | -0.114 | 0.017 | 1.45E-11 | 0.950 |
| DQB1 | 66  |    | D | E | 0.281 | 0.165  | 0.018 | 1.43E-19 | 0.998 |
| DQB1 | 67  |    | I | V | 0.281 | 0.165  | 0.018 | 1.43E-19 | 0.998 |
| DQB1 | 70  | G  | P | A | 0.358 | -0.099 | 0.018 | 1.80E-08 | 0.965 |
| DQB1 | 70  | R  | P | A | 0.618 | 0.082  | 0.017 | 2.28E-06 | 0.966 |
| DQB1 | 71  | KD | P | A | 0.278 | 0.168  | 0.018 | 4.08E-20 | 0.998 |
| DQB1 | 71  | K  | P | A | 0.254 | 0.161  | 0.019 | 1.35E-17 | 0.999 |
| DQB1 | 71  | T  | P | A | 0.572 | -0.120 | 0.017 | 5.26E-13 | 0.995 |
| DQB1 | 71  | KA | P | A | 0.404 | 0.108  | 0.017 | 9.14E-11 | 0.996 |
| DQB1 | 74  | A  | P | A | 0.254 | 0.161  | 0.019 | 1.35E-17 | 0.999 |
| DQB1 | 74  | E  | P | A | 0.572 | -0.120 | 0.017 | 5.25E-13 | 0.995 |
| DQB1 | 75  |    | V | L | 0.428 | 0.120  | 0.017 | 5.30E-13 | 0.995 |
| DQB1 | 77  |    | R | T | 0.406 | 0.108  | 0.017 | 1.18E-10 | 0.995 |
| DQB1 | 84  | Q  | P | A | 0.605 | 0.097  | 0.017 | 1.32E-08 | 0.996 |
| DQB1 | 84  | E  | P | A | 0.393 | -0.096 | 0.017 | 1.55E-08 | 0.996 |
| DQB1 | 85  | L  | P | A | 0.605 | 0.096  | 0.017 | 1.32E-08 | 0.997 |
| DQB1 | 85  | V  | P | A | 0.393 | -0.096 | 0.017 | 1.55E-08 | 0.996 |

|      |     |     |   |   |       |        |       |          |          |       |
|------|-----|-----|---|---|-------|--------|-------|----------|----------|-------|
| DQB1 | 86  | EG  | P | A | 0.637 | 0.101  | 0.018 | 9.60E-09 |          | 0.965 |
| DQB1 | 86  | A   | P | A | 0.361 | -0.100 | 0.018 | 1.13E-08 | 2.46E-08 | 0.965 |
| DQB1 | 86  | E   | P | A | 0.605 | 0.096  | 0.017 | 1.33E-08 |          | 0.996 |
| DQB1 | 86  | Ex  | P | A | 0.607 | 0.096  | 0.017 | 1.55E-08 |          | 0.996 |
| DQB1 | 87  | L   | P | A | 0.605 | 0.096  | 0.017 | 1.32E-08 |          | 0.997 |
| DQB1 | 87  | Lx  | P | A | 0.606 | 0.096  | 0.017 | 1.55E-08 | 5.27E-09 | 0.997 |
| DQB1 | 87  | LY  | P | A | 0.786 | 0.108  | 0.020 | 1.02E-07 |          | 0.956 |
| DQB1 | 87  | F   | P | A | 0.212 | -0.108 | 0.020 | 1.13E-07 |          | 0.955 |
| DQB1 | 89  | T   | P | A | 0.605 | 0.097  | 0.017 | 1.32E-08 |          | 0.997 |
| DQB1 | 89  | G   | P | A | 0.393 | -0.096 | 0.017 | 1.55E-08 |          | 0.996 |
| DQB1 | 90  | T   | P | A | 0.605 | 0.096  | 0.017 | 1.31E-08 |          | 0.997 |
| DQB1 | 90  | I   | P | A | 0.394 | -0.096 | 0.017 | 1.54E-08 |          | 0.997 |
| DQB1 | 125 | A   | P | A | 0.605 | 0.096  | 0.017 | 1.31E-08 |          | 0.998 |
| DQB1 | 125 | Ax  | P | A | 0.606 | 0.096  | 0.017 | 1.54E-08 | 1.86E-08 | 0.997 |
| DQB1 | 125 | AS  | P | A | 0.752 | 0.096  | 0.019 | 3.50E-07 |          | 0.989 |
| DQB1 | 125 | G   | P | A | 0.244 | -0.097 | 0.019 | 3.66E-07 |          | 0.998 |
| DQB1 | 167 | R   | P | A | 0.817 | 0.092  | 0.022 | 1.82E-05 |          | 0.987 |
| DQB1 | 167 | H   | P | A | 0.181 | -0.092 | 0.022 | 2.13E-05 |          | 0.988 |
| DQB1 | 203 | I   | P | A | 0.606 | 0.096  | 0.017 | 2.05E-08 |          | 0.991 |
| DQB1 | 203 | V   | P | A | 0.391 | -0.095 | 0.017 | 2.46E-08 |          | 0.997 |
| DQB1 | 220 | H   | P | A | 0.603 | 0.097  | 0.017 | 1.44E-08 |          | 0.985 |
| DQB1 | 220 | R   | P | A | 0.394 | -0.096 | 0.017 | 1.62E-08 |          | 0.996 |
| DQB1 | 221 | H   | P | A | 0.604 | 0.097  | 0.017 | 1.50E-08 |          | 0.986 |
| DQB1 | 221 | Q   | P | A | 0.394 | -0.096 | 0.017 | 1.59E-08 |          | 0.995 |
| DRB1 | -1  | S   | P | A | 0.149 | -0.135 | 0.023 | 4.34E-09 |          | 0.994 |
| DRB1 | -1  | A   | P | A | 0.814 | 0.102  | 0.022 | 2.90E-06 |          | 0.921 |
| DRB1 | -16 | A   | P | A | 0.501 | -0.100 | 0.016 | 1.04E-09 |          | 0.986 |
| DRB1 | -16 | V   | P | A | 0.462 | 0.094  | 0.017 | 2.38E-08 |          | 0.944 |
| DRB1 | -17 | T   | P | A | 0.162 | -0.138 | 0.022 | 7.76E-10 |          | 0.977 |
| DRB1 | -17 | A   | P | A | 0.801 | 0.107  | 0.021 | 5.93E-07 |          | 0.911 |
| DRB1 | -25 | K   | P | A | 0.501 | -0.100 | 0.016 | 1.04E-09 |          | 0.986 |
| DRB1 | -25 | R   | P | A | 0.462 | 0.094  | 0.017 | 2.38E-08 |          | 0.944 |
| DRB1 | 9   | W   | P | A | 0.300 | -0.084 | 0.018 | 2.87E-06 |          | 0.985 |
| DRB1 | 9   | E   | P | A | 0.687 | 0.083  | 0.018 | 2.92E-06 |          | 0.985 |
| DRB1 | 10  | Q   | P | A | 0.501 | -0.100 | 0.016 | 1.03E-09 |          | 0.987 |
| DRB1 | 10  | Y   | P | A | 0.493 | 0.100  | 0.016 | 1.40E-09 |          | 0.987 |
| DRB1 | 11  | SG  | P | A | 0.632 | 0.112  | 0.017 | 6.43E-11 |          | 0.986 |
| DRB1 | 11  | SGD | P | A | 0.644 | 0.112  | 0.017 | 6.57E-11 | 1.68E-10 | 0.986 |
| DRB1 | 11  | SGL | P | A | 0.638 | 0.108  | 0.017 | 3.04E-10 |          | 0.999 |
| DRB1 | 11  | PV  | P | A | 0.350 | -0.108 | 0.017 | 3.08E-10 |          | 0.999 |

|      |    |     |   |   |       |        |       |          |          |       |
|------|----|-----|---|---|-------|--------|-------|----------|----------|-------|
| DRB1 | 11 | PL  | P | A | 0.162 | -0.138 | 0.022 | 7.76E-10 |          | 0.977 |
| DRB1 | 11 | S   | P | A | 0.493 | 0.100  | 0.016 | 1.40E-09 |          | 0.987 |
| DRB1 | 11 | SVG | P | A | 0.826 | 0.132  | 0.022 | 1.62E-09 |          | 0.978 |
| DRB1 | 11 | SD  | P | A | 0.506 | 0.099  | 0.016 | 1.90E-09 |          | 0.987 |
| DRB1 | 11 | P   | P | A | 0.156 | -0.133 | 0.023 | 4.13E-09 |          | 1.000 |
| DRB1 | 11 | SL  | P | A | 0.499 | 0.095  | 0.016 | 6.21E-09 |          | 0.999 |
| DRB1 | 11 | SLD | P | A | 0.511 | 0.094  | 0.016 | 8.19E-09 |          | 0.999 |
| DRB1 | 11 | PD  | P | A | 0.168 | -0.126 | 0.022 | 8.23E-09 |          | 1.000 |
| DRB1 | 11 | SVD | P | A | 0.700 | 0.084  | 0.018 | 2.87E-06 |          | 0.985 |
| DRB1 | 11 | SV  | P | A | 0.687 | 0.083  | 0.018 | 2.92E-06 |          | 0.985 |
| DRB1 | 11 | PG  | P | A | 0.295 | -0.080 | 0.018 | 9.14E-06 |          | 1.000 |
| DRB1 | 11 | SVL | P | A | 0.693 | 0.079  | 0.018 | 9.24E-06 |          | 1.000 |
| DRB1 | 12 |     | T | K | 0.493 | 0.100  | 0.016 | 1.40E-09 |          | 0.987 |
| DRB1 | 13 | SYG | P | A | 0.632 | 0.112  | 0.017 | 6.43E-11 |          | 0.986 |
| DRB1 | 13 | RH  | P | A | 0.345 | -0.110 | 0.017 | 1.94E-10 |          | 1.000 |
| DRB1 | 13 | SY  | P | A | 0.584 | 0.105  | 0.017 | 5.56E-10 |          | 0.941 |
| DRB1 | 13 | SG  | P | A | 0.493 | 0.100  | 0.016 | 1.40E-09 |          | 0.987 |
| DRB1 | 13 | SYF | P | A | 0.607 | 0.103  | 0.017 | 1.91E-09 |          | 0.953 |
| DRB1 | 13 | S   | P | A | 0.445 | 0.100  | 0.017 | 3.29E-09 |          | 0.942 |
| DRB1 | 13 | RF  | P | A | 0.180 | -0.127 | 0.022 | 3.68E-09 |          | 0.978 |
| DRB1 | 13 | R   | P | A | 0.156 | -0.133 | 0.023 | 4.13E-09 | 2.63E-10 | 1.000 |
| DRB1 | 13 | SFG | P | A | 0.517 | 0.095  | 0.016 | 6.11E-09 |          | 1.000 |
| DRB1 | 13 | SF  | P | A | 0.469 | 0.094  | 0.017 | 1.66E-08 |          | 0.955 |
| DRB1 | 13 | SHY | P | A | 0.772 | 0.104  | 0.020 | 2.49E-07 |          | 0.919 |
| DRB1 | 13 | RG  | P | A | 0.204 | -0.105 | 0.021 | 4.24E-07 |          | 0.932 |
| DRB1 | 13 | SHG | P | A | 0.682 | 0.082  | 0.018 | 4.16E-06 |          | 0.985 |
| DRB1 | 13 | RY  | P | A | 0.295 | -0.080 | 0.018 | 9.14E-06 |          | 1.000 |
| DRB1 | 13 | SH  | P | A | 0.634 | 0.074  | 0.017 | 2.29E-05 |          | 0.938 |
| DRB1 | 32 |     | H | Y | 0.392 | 0.112  | 0.019 | 9.77E-09 |          | 0.734 |
| DRB1 | 37 | SL  | P | A | 0.184 | -0.149 | 0.022 | 1.41E-11 |          | 0.911 |
| DRB1 | 37 | N   | P | A | 0.361 | 0.135  | 0.020 | 1.99E-11 |          | 0.664 |
| DRB1 | 37 | NF  | P | A | 0.516 | 0.122  | 0.019 | 1.48E-10 |          | 0.703 |
| DRB1 | 37 | S   | P | A | 0.169 | -0.143 | 0.023 | 3.03E-10 | 8.72E-11 | 0.934 |
| DRB1 | 37 | NL  | P | A | 0.376 | 0.121  | 0.020 | 1.28E-09 |          | 0.675 |
| DRB1 | 37 | SY  | P | A | 0.469 | -0.112 | 0.019 | 4.53E-09 |          | 0.714 |
| DRB1 | 37 | NY  | P | A | 0.662 | 0.100  | 0.018 | 3.47E-08 |          | 0.889 |
| DRB1 | 37 | SF  | P | A | 0.323 | -0.093 | 0.018 | 4.46E-07 |          | 0.898 |
| DRB1 | 70 | D   | P | A | 0.523 | 0.128  | 0.021 | 2.36E-09 |          | 0.488 |
| DRB1 | 70 | Q   | P | A | 0.444 | -0.127 | 0.022 | 5.36E-09 |          | 0.471 |
| DRB1 | 71 | E   | P | A | 0.241 | 0.174  | 0.025 | 8.01E-12 | 2.24E-11 | 0.445 |

|      |     |    |   |   |       |        |       |          |       |
|------|-----|----|---|---|-------|--------|-------|----------|-------|
| DRB1 | 71  | A  | P | A | 0.127 | -0.164 | 0.028 | 4.00E-09 | 0.785 |
| DRB1 | 71  | KA | P | A | 0.367 | -0.152 | 0.026 | 7.71E-09 | 0.328 |
| DRB1 | 71  | KE | P | A | 0.481 | 0.126  | 0.022 | 9.04E-09 | 0.480 |
| DRB1 | 96  | H  | P | A | 0.612 | 0.124  | 0.018 | 2.22E-12 | 0.867 |
| DRB1 | 96  | Hx | P | A | 0.626 | 0.120  | 0.017 | 6.27E-12 | 0.912 |
| DRB1 | 96  | HE | P | A | 0.637 | 0.114  | 0.018 | 7.07E-11 | 0.946 |
| DRB1 | 96  | HY | P | A | 0.801 | 0.145  | 0.023 | 1.21E-10 | 0.796 |
| DRB1 | 96  | QE | P | A | 0.186 | -0.143 | 0.022 | 2.25E-10 | 0.864 |
| DRB1 | 96  | QY | P | A | 0.350 | -0.109 | 0.017 | 2.33E-10 | 0.997 |
| DRB1 | 96  | Qx | P | A | 0.175 | -0.133 | 0.023 | 3.59E-09 | 0.910 |
| DRB1 | 96  | Q  | P | A | 0.162 | -0.128 | 0.022 | 9.23E-09 | 0.999 |
| DRB1 | 133 | R  | P | A | 0.818 | 0.141  | 0.023 | 7.57E-10 | 0.834 |
| DRB1 | 133 | L  | P | A | 0.156 | -0.133 | 0.023 | 3.98E-09 | 0.999 |
| DRB1 | 140 | T  | P | A | 0.643 | 0.096  | 0.018 | 2.15E-07 | 0.815 |
| DRB1 | 140 | A  | P | A | 0.331 | -0.091 | 0.018 | 6.32E-07 | 0.907 |
| DRB1 | 142 | V  | P | A | 0.818 | 0.141  | 0.023 | 7.57E-10 | 0.834 |
| DRB1 | 142 | M  | P | A | 0.156 | -0.133 | 0.023 | 3.98E-09 | 0.999 |
| DRB1 | 149 | H  | P | A | 0.449 | 0.119  | 0.017 | 1.05E-11 | 0.837 |
| DRB1 | 149 | Q  | P | A | 0.525 | -0.109 | 0.017 | 1.16E-10 | 0.919 |
| DRB1 | 233 | T  | P | A | 0.626 | -0.124 | 0.017 | 4.27E-13 | 0.985 |
| DRB1 | 233 | R  | P | A | 0.335 | 0.117  | 0.018 | 5.48E-11 | 0.954 |

**Table S24:** TWAS results for antigen response phenotypes that were analyzed using gene expression models based on whole blood and brain tissues. Associations with  $P_{TWAS} < 4.2 \times 10^{-6}$  are considered statistically significant and genes with  $P_{TWAS} < 4.5 \times 10^{-5}$  are considered suggestive.

| Antigen   | Region          | Gene ID         | Gene               | Whole Blood          |                      | Brain (Frontal Cortex) |                       |
|-----------|-----------------|-----------------|--------------------|----------------------|----------------------|------------------------|-----------------------|
|           |                 |                 |                    | Z                    | $P_{TWAS}$           | Z                      | $P_{TWAS}$            |
| BKV       | 19q13.33        | ENSG00000176909 | <i>MAMSTR</i>      | -4.22                | $2.4 \times 10^{-5}$ | -                      | -                     |
|           | 7q21.2          | ENSG00000004766 | <i>VPS50</i>       | 4.09                 | $4.4 \times 10^{-5}$ | -0.33                  | 0.74                  |
|           | 19q13.33        | ENSG00000142233 | <i>NTN5</i>        | -2.33                | 0.020                | 6.09                   | $1.1 \times 10^{-9}$  |
|           | 19q13.33        | ENSG00000176920 | <i>FUT2</i>        | -                    | -                    | 7.16                   | $8.1 \times 10^{-13}$ |
|           | 20q13.2         | ENSG00000054803 | <i>CBLN4</i>       | -                    | -                    | 4.09                   | $4.4 \times 10^{-5}$  |
| CMV pp150 | 16p13.3         | ENSG00000172366 | <i>MCRIP2</i>      | -0.44                | 0.66                 | -4.10                  | $4.1 \times 10^{-5}$  |
| CMV pp52  | 3q13.12         | ENSG00000196776 | <i>CD47</i>        | -4.49                | $7.3 \times 10^{-6}$ | -                      | -                     |
| HHV6 IE1A | 6p21.32         | ENSG00000196735 | <i>HLA-DQA1</i>    | 4.29                 | $1.8 \times 10^{-5}$ | 4.34                   | $1.4 \times 10^{-5}$  |
|           | 6p21.33         | ENSG00000204525 | <i>HLA-C</i>       | -2.97                | $3.0 \times 10^{-3}$ | -4.25                  | $2.1 \times 10^{-5}$  |
| HHV6 p101 | 4q13.3          | ENSG00000163734 | <i>CXCL3</i>       | 4.12                 | $3.8 \times 10^{-5}$ | 4.12                   | $3.8 \times 10^{-5}$  |
| HHV7      | 6p21.32         | ENSG00000232629 | <i>HLA-DQB2</i>    | 5.38                 | $7.3 \times 10^{-8}$ | 5.29                   | $1.2 \times 10^{-7}$  |
|           | 6p21.32         | ENSG00000179344 | <i>HLA-DQB1</i>    | -5.07                | $3.9 \times 10^{-7}$ | 0.64                   | 0.52                  |
|           | 22q13.2         | ENSG00000273424 | <i>CTA-223H9.9</i> | -4.71                | $2.5 \times 10^{-6}$ | -4.71                  | $2.5 \times 10^{-6}$  |
|           | 22q13.2         | ENSG00000167074 | <i>TEF</i>         | 4.66                 | $3.1 \times 10^{-6}$ | -                      | -                     |
|           | 22q13.33        | ENSG00000025708 | <i>TYMP</i>        | 4.54                 | $5.6 \times 10^{-6}$ | 3.98                   | $6.8 \times 10^{-5}$  |
|           | 6p21.32         | ENSG00000204267 | <i>TAP2</i>        | -4.48                | $7.4 \times 10^{-6}$ | 1.90                   | 0.058                 |
|           | 17q21.32        | ENSG00000198933 | <i>TBKBP1</i>      | -4.41                | $1.0 \times 10^{-5}$ | -4.21                  | $2.6 \times 10^{-5}$  |
|           | 22q13.33        | ENSG00000177989 | <i>ODF3B</i>       | 4.30                 | $1.7 \times 10^{-5}$ | 3.01                   | $2.6 \times 10^{-3}$  |
|           | 22q13.2         | ENSG00000100417 | <i>PMM1</i>        | -4.26                | $2.0 \times 10^{-5}$ | -1.90                  | 0.057                 |
|           | 6p21.33         | ENSG00000204428 | <i>LY6G5C</i>      | 4.24                 | $2.3 \times 10^{-5}$ | 4.24                   | $2.3 \times 10^{-5}$  |
|           | 22q13.2         | ENSG00000172346 | <i>CSDC2</i>       | 4.14                 | $3.4 \times 10^{-5}$ | 4.67                   | $3.0 \times 10^{-6}$  |
|           | 1q31.2          | ENSG00000090104 | <i>RGS1</i>        | 2.70                 | $6.9 \times 10^{-3}$ | -4.65                  | $3.3 \times 10^{-6}$  |
|           | 2q11.2          | ENSG00000198885 | <i>ITPRIPL1</i>    | -2.66                | $7.9 \times 10^{-3}$ | -4.09                  | $4.4 \times 10^{-5}$  |
| HSV1      | 6p21.32         | ENSG00000204261 | <i>PSMB8-AS1</i>   | 2.38                 | 0.017                | -5.06                  | $4.1 \times 10^{-7}$  |
|           | 6p21.32         | ENSG00000241404 | <i>EGFL8</i>       | -0.83                | 0.41                 | -5.36                  | $8.4 \times 10^{-8}$  |
|           | 6p21.32         | ENSG00000179344 | <i>HLA-DQB1</i>    | -5.46                | $4.8 \times 10^{-8}$ | -4.62                  | $3.9 \times 10^{-6}$  |
|           | 6p21.32         | ENSG00000232629 | <i>HLA-DQB2</i>    | 5.11                 | $3.3 \times 10^{-7}$ | 4.99                   | $5.9 \times 10^{-7}$  |
|           | 6p21.32         | ENSG00000204257 | <i>HLA-DMA</i>     | 4.93                 | $8.2 \times 10^{-7}$ | 4.88                   | $1.0 \times 10^{-6}$  |
|           | 6p21.33         | ENSG00000204444 | <i>APOM</i>        | -4.71                | $2.5 \times 10^{-6}$ | -4.60                  | $4.3 \times 10^{-6}$  |
|           | 6p21.33         | ENSG00000204386 | <i>NEU1</i>        | -4.44                | $9.1 \times 10^{-6}$ | -                      | -                     |
|           | 6p21.33         | ENSG00000231852 | <i>CYP21A2</i>     | 4.41                 | $1.0 \times 10^{-5}$ | -                      | -                     |
|           | 6p21.33         | ENSG00000224389 | <i>C4B</i>         | 4.40                 | $1.1 \times 10^{-5}$ | -                      | -                     |
|           | 6p21.33         | ENSG00000166278 | <i>C2</i>          | 4.38                 | $1.2 \times 10^{-5}$ | -                      | -                     |
| 6p21.33   | ENSG00000213719 | <i>CLIC1</i>    | -4.34              | $1.5 \times 10^{-5}$ | -4.34                | $1.5 \times 10^{-5}$   |                       |
| 6p21.32   | ENSG00000204305 | <i>AGER</i>     | 4.13               | $3.6 \times 10^{-5}$ | 2.96                 | $3.0 \times 10^{-3}$   |                       |

|     |         |                 |                  |        |                       |        |                       |
|-----|---------|-----------------|------------------|--------|-----------------------|--------|-----------------------|
|     | 6p21.33 | ENSG00000244731 | <i>C4A</i>       | -4.09  | 4.3×10 <sup>-5</sup>  | -4.29  | 1.8×10 <sup>-5</sup>  |
|     | 6p21.32 | ENSG00000204308 | <i>RNF5</i>      | -1.92  | 0.055                 | -4.82  | 1.5×10 <sup>-6</sup>  |
|     | 6p21.32 | ENSG00000196735 | <i>HLA-DQA1</i>  | -1.80  | 0.072                 | -4.25  | 2.1×10 <sup>-5</sup>  |
|     | 6p21.32 | ENSG00000242574 | <i>HLA-DMB</i>   | -0.81  | 0.42                  | 5.00   | 5.6×10 <sup>-7</sup>  |
|     | 6p21.32 | ENSG00000196126 | <i>HLA-DRB1</i>  | -      | -                     | -4.50  | 6.8×10 <sup>-6</sup>  |
|     | 6p21.32 | ENSG00000237541 | <i>HLA-DQA2</i>  | 7.09   | 1.3×10 <sup>-12</sup> | -      | -                     |
|     | 6p21.33 | ENSG00000204371 | <i>EHMT2</i>     | -6.95  | 3.7×10 <sup>-12</sup> | -      | -                     |
|     | 6p21.32 | ENSG00000204305 | <i>AGER</i>      | 6.14   | 8.0×10 <sup>-10</sup> | 7.45   | 9.5×10 <sup>-14</sup> |
|     | 6p21.32 | ENSG00000232629 | <i>HLA-DQB2</i>  | 6.11   | 9.9×10 <sup>-10</sup> | 5.97   | 2.4×10 <sup>-9</sup>  |
|     | 6p21.32 | ENSG00000179344 | <i>HLA-DQB1</i>  | -5.88  | 4.2×10 <sup>-9</sup>  | -0.31  | 0.76                  |
|     | 6p21.33 | ENSG00000213722 | <i>DDAH2</i>     | -5.44  | 5.5×10 <sup>-8</sup>  | -1.34  | 0.18                  |
|     | 6p21.32 | ENSG00000204308 | <i>RNF5</i>      | -5.02  | 5.2×10 <sup>-7</sup>  | -1.74  | 0.082                 |
|     | 6p21.32 | ENSG00000204310 | <i>AGPAT1</i>    | -4.85  | 1.2×10 <sup>-6</sup>  | 5.07   | 4.1×10 <sup>-7</sup>  |
| JCV | 6p21.33 | ENSG00000198563 | <i>DDX39B</i>    | -4.84  | 1.3×10 <sup>-6</sup>  | -0.43  | 0.67                  |
|     | 6p21.32 | ENSG00000240065 | <i>PSMB9</i>     | 4.47   | 7.7×10 <sup>-6</sup>  | 2.01   | 0.045                 |
|     | 6p21.33 | ENSG00000213760 | <i>ATP6V1G2</i>  | 2.80   | 5.1×10 <sup>-3</sup>  | -4.46  | 8.3×10 <sup>-6</sup>  |
|     | 11q13.4 | ENSG00000214517 | <i>PPME1</i>     | 2.22   | 0.026                 | 4.31   | 1.6×10 <sup>-5</sup>  |
|     | 6p21.32 | ENSG00000204264 | <i>PSMB8</i>     | 1.99   | 0.047                 | 4.17   | 3.0×10 <sup>-5</sup>  |
|     | 6p21.32 | ENSG00000204252 | <i>HLA-DOA</i>   | -0.68  | 0.50                  | -4.56  | 5.2×10 <sup>-6</sup>  |
|     | 6p21.32 | ENSG00000204315 | <i>FKBPL</i>     | 0.01   | 0.99                  | -4.53  | 6.0×10 <sup>-6</sup>  |
|     | 6p21.32 | ENSG00000196126 | <i>HLA-DRB1</i>  | -      | -                     | -7.50  | 6.5×10 <sup>-14</sup> |
|     | 6p21.33 | ENSG00000204540 | <i>PSORS1C1</i>  | -      | -                     | -4.69  | 2.8×10 <sup>-6</sup>  |
|     | 6p21.33 | ENSG00000204444 | <i>APOM</i>      | -10.73 | 7.5×10 <sup>-27</sup> | -10.47 | 1.1×10 <sup>-25</sup> |
|     | 6p21.33 | ENSG00000231852 | <i>CYP21A2</i>   | 10.53  | 6.5×10 <sup>-26</sup> | -      | -                     |
|     | 6p21.33 | ENSG00000224389 | <i>C4B</i>       | 10.47  | 1.2×10 <sup>-25</sup> | -      | -                     |
|     | 6p21.33 | ENSG00000166278 | <i>C2</i>        | 10.29  | 8.1×10 <sup>-25</sup> | -      | -                     |
|     | 6p21.33 | ENSG00000204386 | <i>NEU1</i>      | -10.28 | 8.4×10 <sup>-25</sup> | -      | -                     |
|     | 6p21.33 | ENSG00000213719 | <i>CLIC1</i>     | -10.22 | 1.6×10 <sup>-24</sup> | -10.22 | 1.6×10 <sup>-24</sup> |
|     | 6p21.33 | ENSG00000244731 | <i>C4A</i>       | -10.19 | 2.3×10 <sup>-24</sup> | -10.16 | 2.9×10 <sup>-24</sup> |
|     | 6p22.1  | ENSG00000204613 | <i>TRIM10</i>    | -8.82  | 1.1×10 <sup>-18</sup> | -      | -                     |
|     | 6p21.32 | ENSG00000204305 | <i>AGER</i>      | 8.69   | 3.6×10 <sup>-18</sup> | 4.44   | 9.1×10 <sup>-6</sup>  |
| VZV | 6p21.33 | ENSG00000214894 | <i>LINC00243</i> | 8.01   | 1.1×10 <sup>-15</sup> | -      | -                     |
|     | 6p22.1  | ENSG00000281831 | <i>HCP5B</i>     | 7.90   | 2.8×10 <sup>-15</sup> | 1.53   | 0.13                  |
|     | 6p22.1  | ENSG00000187626 | <i>ZKSCAN4</i>   | 7.84   | 4.5×10 <sup>-15</sup> | 7.24   | 4.4×10 <sup>-13</sup> |
|     | 6p22.1  | ENSG00000204681 | <i>GABBR1</i>    | 7.29   | 3.1×10 <sup>-13</sup> | 1.02   | 0.31                  |
|     | 6p22.1  | ENSG00000204657 | <i>OR2H2</i>     | 7.09   | 1.3×10 <sup>-12</sup> | 0.27   | 0.79                  |
|     | 6p22.1  | ENSG00000204644 | <i>ZFP57</i>     | 7.09   | 1.4×10 <sup>-12</sup> | -      | -                     |
|     | 6p21.33 | ENSG00000204435 | <i>CSNK2B</i>    | 7.06   | 1.7×10 <sup>-12</sup> | -4.09  | 4.2×10 <sup>-5</sup>  |
|     | 6p22.2  | ENSG00000186470 | <i>BTN3A2</i>    | -6.91  | 4.8×10 <sup>-12</sup> | -6.72  | 1.8×10 <sup>-11</sup> |
|     | 6p21.32 | ENSG00000204257 | <i>HLA-DMA</i>   | 6.75   | 1.5×10 <sup>-11</sup> | 6.76   | 1.3×10 <sup>-11</sup> |



|         |                 |             |       |                       |       |                       |
|---------|-----------------|-------------|-------|-----------------------|-------|-----------------------|
| 6p22.1  | ENSG00000158691 | ZSCAN12     | -6.73 | 1.7×10 <sup>-11</sup> | 5.45  | 5.0×10 <sup>-8</sup>  |
| 6p21.32 | ENSG00000204304 | PBX2        | -6.28 | 3.5×10 <sup>-10</sup> | -1.48 | 0.14                  |
| 6p22.1  | ENSG00000189298 | ZKSCAN3     | 6.20  | 5.7×10 <sup>-10</sup> | -2.35 | 0.019                 |
| 6p22.1  | ENSG00000206503 | HLA-A       | -6.14 | 8.2×10 <sup>-10</sup> | 0.13  | 0.89                  |
| 6p22.1  | ENSG00000261353 | CTA-14H9.5  | -5.96 | 2.5×10 <sup>-9</sup>  | -     | -                     |
| 6p21.32 | ENSG00000179344 | HLA-DQB1    | -5.96 | 2.6×10 <sup>-9</sup>  | -6.33 | 2.5×10 <sup>-10</sup> |
| 6p22.1  | ENSG00000137185 | ZSCAN9      | -5.86 | 4.7×10 <sup>-9</sup>  | 7.84  | 4.6×10 <sup>-15</sup> |
| 6p21.32 | ENSG00000232629 | HLA-DQB2    | 5.79  | 7.0×10 <sup>-9</sup>  | 5.61  | 2.1×10 <sup>-8</sup>  |
| 6p21.33 | ENSG00000204536 | CCHCR1      | 5.72  | 1.1×10 <sup>-8</sup>  | 7.34  | 2.2×10 <sup>-13</sup> |
| 6p22.1  | ENSG00000197062 | ZSCAN26     | -5.57 | 2.5×10 <sup>-8</sup>  | -5.71 | 1.1×10 <sup>-8</sup>  |
| 6p21.33 | ENSG00000204463 | BAG6        | 5.52  | 3.3×10 <sup>-8</sup>  | -4.29 | 1.8×10 <sup>-5</sup>  |
| 6p22.2  | ENSG00000180596 | HIST1H2BC   | -5.46 | 4.8×10 <sup>-8</sup>  | -2.38 | 0.017                 |
| 6p22.1  | ENSG00000204655 | MOG         | 5.42  | 5.9×10 <sup>-8</sup>  | -     | -                     |
| 6p22.2  | ENSG00000272462 | U91328.19   | 5.02  | 5.1×10 <sup>-7</sup>  | 2.19  | 0.028                 |
| 6p21.33 | ENSG00000204396 | VWA7        | -4.90 | 9.5×10 <sup>-7</sup>  | 5.72  | 1.0×10 <sup>-8</sup>  |
| 6p21.33 | ENSG00000204388 | HSPA1B      | 4.89  | 1.0×10 <sup>-6</sup>  | -     | -                     |
| 6p21.32 | ENSG00000221988 | PPT2        | 4.79  | 1.6×10 <sup>-6</sup>  | -1.48 | 0.14                  |
| 6p22.1  | ENSG00000272468 | RP1-86C11.7 | -4.61 | 3.9×10 <sup>-6</sup>  | 1.12  | 0.26                  |
| 6p22.1  | ENSG00000234127 | TRIM26      | 4.56  | 5.0×10 <sup>-6</sup>  | 1.58  | 0.11                  |
| 6p22.1  | ENSG00000137338 | PGBD1       | 4.56  | 5.2×10 <sup>-6</sup>  | 1.34  | 0.18                  |
| 6p22.2  | ENSG00000010704 | HFE         | -4.42 | 9.8×10 <sup>-6</sup>  | -1.15 | 0.25                  |
| 6p22.1  | ENSG00000241370 | RPP21       | 4.41  | 1.0×10 <sup>-5</sup>  | -3.91 | 9.3×10 <sup>-5</sup>  |
| 6p21.33 | ENSG00000204371 | EHMT2       | -4.36 | 1.3×10 <sup>-5</sup>  | -     | -                     |
| 6p22.1  | ENSG00000204632 | HLA-G       | 4.24  | 2.2×10 <sup>-5</sup>  | -0.64 | 0.52                  |
| 6p22.2  | ENSG00000124508 | BTN2A2      | 4.22  | 2.5×10 <sup>-5</sup>  | -1.95 | 0.051                 |
| 6p21.32 | ENSG00000204310 | AGPAT1      | -3.70 | 2.2×10 <sup>-4</sup>  | 4.26  | 2.0×10 <sup>-5</sup>  |
| 6p21.33 | ENSG00000204387 | C6orf48     | -2.96 | 3.1×10 <sup>-3</sup>  | -4.18 | 3.0×10 <sup>-5</sup>  |
| 6p21.32 | ENSG00000204264 | PSMB8       | 2.89  | 3.8×10 <sup>-3</sup>  | 4.83  | 1.3×10 <sup>-6</sup>  |
| 6p21.33 | ENSG00000213722 | DDAH2       | -2.46 | 0.014                 | -8.27 | 1.3×10 <sup>-16</sup> |
| 6p21.32 | ENSG00000204301 | NOTCH4      | -2.37 | 0.018                 | -6.98 | 3.0×10 <sup>-12</sup> |
| 6p21.33 | ENSG00000204420 | MPIG6B      | 2.10  | 0.036                 | -5.68 | 1.4×10 <sup>-8</sup>  |
| 6p22.1  | ENSG00000112812 | PRSS16      | 2.03  | 0.043                 | 4.94  | 7.7×10 <sup>-7</sup>  |
| 6p22.1  | ENSG00000198315 | ZKSCAN8     | 1.66  | 0.097                 | -4.90 | 9.5×10 <sup>-7</sup>  |
| 6p21.33 | ENSG00000137411 | VAR2        | -1.64 | 0.10                  | -5.17 | 2.3×10 <sup>-7</sup>  |
| 6p21.33 | ENSG00000204410 | MSH5        | -1.45 | 0.15                  | -7.81 | 5.7×10 <sup>-15</sup> |
| 6p21.32 | ENSG00000213676 | ATF6B       | -1.36 | 0.18                  | -4.38 | 1.2×10 <sup>-5</sup>  |
| 6p21.33 | ENSG00000137312 | FLOT1       | 1.22  | 0.22                  | 6.32  | 2.6×10 <sup>-10</sup> |
| 6p21.33 | ENSG00000226979 | LTA         | -0.97 | 0.33                  | 4.09  | 4.3×10 <sup>-5</sup>  |
| 6p21.33 | ENSG00000213760 | ATP6V1G2    | 0.83  | 0.40                  | -5.43 | 5.8×10 <sup>-8</sup>  |
| 6p21.32 | ENSG00000204308 | RNF5        | -0.69 | 0.49                  | -9.65 | 5.2×10 <sup>-22</sup> |

|         |                 |                 |       |      |       |                       |
|---------|-----------------|-----------------|-------|------|-------|-----------------------|
| 6p21.32 | ENSG00000242574 | <i>HLA-DMB</i>  | 0.55  | 0.58 | 6.63  | $3.3 \times 10^{-11}$ |
| 6p21.32 | ENSG00000196735 | <i>HLA-DQA1</i> | -0.37 | 0.71 | -5.22 | $1.8 \times 10^{-7}$  |
| 6p21.33 | ENSG00000228022 | <i>HCG20</i>    | -     | -    | -5.62 | $1.9 \times 10^{-8}$  |
| 6p21.33 | ENSG00000204540 | <i>PSORS1C1</i> | -     | -    | -5.09 | $3.6 \times 10^{-7}$  |
| 6p21.33 | ENSG00000204531 | <i>POU5F1</i>   | -     | -    | 4.23  | $2.4 \times 10^{-5}$  |
| 10p14   | ENSG00000151657 | <i>KIN</i>      | -     | -    | 4.14  | $3.5 \times 10^{-5}$  |

**Table S25:** TWAS results for EBV antigen response phenotypes that were analyzed using gene expression models based on whole blood, brain tissues, and EBV-transformed lymphocytes. Associations with  $P_{TWAS} < 4.2 \times 10^{-6}$  are considered statistically significant and genes with  $P_{TWAS} < 4.5 \times 10^{-5}$  are considered suggestive.

| Antigen     | Region          | Gene ID         | Gene             | Whole Blood |                       | Brain (Frontal Cortex) |                       | EBV Lymphocytes |                       |
|-------------|-----------------|-----------------|------------------|-------------|-----------------------|------------------------|-----------------------|-----------------|-----------------------|
|             |                 |                 |                  | Z           | $P_{TWAS}$            | Z                      | $P_{TWAS}$            | Z               | $P_{TWAS}$            |
| EBV<br>EA-D | 6p21.32         | ENSG00000204257 | <i>HLA-DMA</i>   | -5.91       | $3.5 \times 10^{-9}$  | -5.93                  | $3.0 \times 10^{-9}$  | 5.88            | $4.0 \times 10^{-9}$  |
|             | 6p21.33         | ENSG00000204444 | <i>APOM</i>      | 5.86        | $4.6 \times 10^{-9}$  | 5.73                   | $1.0 \times 10^{-8}$  | 5.45            | $5.1 \times 10^{-8}$  |
|             | 6p21.33         | ENSG00000166278 | <i>C2</i>        | -5.70       | $1.2 \times 10^{-8}$  | -                      | -                     | -               | -                     |
|             | 6p21.33         | ENSG00000244731 | <i>C4A</i>       | 5.66        | $1.5 \times 10^{-8}$  | 5.55                   | $2.9 \times 10^{-8}$  | 5.59            | $2.3 \times 10^{-8}$  |
|             | 6p21.33         | ENSG00000204386 | <i>NEU1</i>      | 5.59        | $2.3 \times 10^{-8}$  | -                      | -                     | -1.65           | 0.099                 |
|             | 6p21.33         | ENSG00000213719 | <i>CLIC1</i>     | 5.55        | $2.9 \times 10^{-8}$  | 5.55                   | $2.9 \times 10^{-8}$  | 1.14            | 0.25                  |
|             | 6p21.33         | ENSG00000224389 | <i>C4B</i>       | -5.43       | $5.6 \times 10^{-8}$  | -                      | -                     | -               | -                     |
|             | 6p21.33         | ENSG00000231852 | <i>CYP21A2</i>   | -5.41       | $6.4 \times 10^{-8}$  | -                      | -                     | -               | -                     |
|             | 6p22.1          | ENSG00000281831 | <i>HCP5B</i>     | -4.66       | $3.2 \times 10^{-6}$  | -5.30                  | $1.1 \times 10^{-7}$  | -6.01           | $1.9 \times 10^{-9}$  |
|             | 6p22.1          | ENSG00000204625 | <i>HCG9</i>      | -4.52       | $6.2 \times 10^{-6}$  | -                      | -                     | -               | -                     |
|             | 6p22.1          | ENSG00000204613 | <i>TRIM10</i>    | 4.48        | $7.6 \times 10^{-6}$  | -                      | -                     | -               | -                     |
|             | 6p21.33         | ENSG00000204388 | <i>HSPA1B</i>    | -4.43       | $9.3 \times 10^{-6}$  | -                      | -                     | 1.61            | 0.11                  |
|             | 6p21.33         | ENSG00000214894 | <i>LINC00243</i> | -4.38       | $1.2 \times 10^{-5}$  | -                      | -                     | 1.19            | 0.23                  |
|             | 6q22.1          | ENSG00000188820 | <i>FAM26F</i>    | 4.26        | $2.0 \times 10^{-5}$  | 4.68                   | $2.8 \times 10^{-6}$  | 3.41            | $6.4 \times 10^{-4}$  |
|             | 6p21.33         | ENSG00000204536 | <i>CCHCR1</i>    | -3.77       | $1.7 \times 10^{-4}$  | -4.75                  | $2.1 \times 10^{-6}$  | 0.40            | 0.69                  |
|             | 20q11.23        | ENSG00000080839 | <i>RBL1</i>      | -2.68       | $7.3 \times 10^{-3}$  | -2.28                  | 0.022                 | -4.10           | $4.2 \times 10^{-5}$  |
|             | 12q23.1         | ENSG00000139343 | <i>SNRPF</i>     | -2.46       | 0.014                 | -4.12                  | $3.9 \times 10^{-5}$  | -4.13           | $3.6 \times 10^{-5}$  |
|             | 6p21.33         | ENSG00000204410 | <i>MSH5</i>      | -2.40       | 0.016                 | 5.71                   | $1.2 \times 10^{-8}$  | -1.32           | 0.19                  |
|             | 6p21.32         | ENSG00000242574 | <i>HLA-DMB</i>   | 2.00        | 0.046                 | -5.80                  | $6.8 \times 10^{-9}$  | -2.59           | $9.7 \times 10^{-3}$  |
|             | 6p21.32         | ENSG00000232629 | <i>HLA-DQB2</i>  | 1.48        | 0.14                  | 1.31                   | 0.19                  | 4.15            | $3.3 \times 10^{-5}$  |
|             | 6p21.33         | ENSG00000204482 | <i>LST1</i>      | 0.87        | 0.39                  | -                      | -                     | -4.34           | $1.4 \times 10^{-5}$  |
|             | 6p21.33         | ENSG00000204560 | <i>DHX16</i>     | 0.72        | 0.47                  | 0.07                   | 0.94                  | -4.17           | $3.1 \times 10^{-5}$  |
|             | 6p21.32         | ENSG00000198502 | <i>HLA-DRB5</i>  | -           | -                     | -                      | -                     | -5.85           | $4.8 \times 10^{-9}$  |
|             | 6p21.33         | ENSG00000204531 | <i>POU5F1</i>    | -           | -                     | -1.64                  | 0.10                  | -5.40           | $6.7 \times 10^{-8}$  |
|             | 6p21.33         | ENSG00000204540 | <i>PSORS1C1</i>  | -           | -                     | 4.43                   | $9.6 \times 10^{-6}$  | 4.67            | $3.0 \times 10^{-6}$  |
|             | 6p21.33         | ENSG00000228022 | <i>HCG20</i>     | -           | -                     | 4.10                   | $4.2 \times 10^{-5}$  | 3.58            | $3.5 \times 10^{-4}$  |
| 6p21.32     | ENSG00000196126 | <i>HLA-DRB1</i> | -                | -           | -4.38                 | $1.2 \times 10^{-5}$   | -                     | -               |                       |
| EBV<br>EBNA | 6p21.32         | ENSG00000179344 | <i>HLA-DQB1</i>  | 13.30       | $2.2 \times 10^{-40}$ | 11.46                  | $2.2 \times 10^{-30}$ | 10.67           | $1.4 \times 10^{-26}$ |
|             | 6p21.32         | ENSG00000232629 | <i>HLA-DQB2</i>  | -12.19      | $3.6 \times 10^{-34}$ | -12.16                 | $5.0 \times 10^{-34}$ | -3.78           | $1.6 \times 10^{-4}$  |
|             | 6p21.32         | ENSG00000204305 | <i>AGER</i>      | -10.70      | $9.9 \times 10^{-27}$ | -8.91                  | $5.1 \times 10^{-19}$ | -7.28           | $3.4 \times 10^{-13}$ |
|             | 6p21.33         | ENSG00000204371 | <i>EHMT2</i>     | 9.43        | $4.0 \times 10^{-21}$ | -                      | -                     | -               | -                     |
|             | 6p21.33         | ENSG00000213722 | <i>DDAH2</i>     | 9.00        | $2.2 \times 10^{-19}$ | 7.76                   | $8.6 \times 10^{-15}$ | 0.01            | 1.00                  |
|             | 6p21.33         | ENSG00000204435 | <i>CSNK2B</i>    | -7.62       | $2.5 \times 10^{-14}$ | 3.36                   | $7.8 \times 10^{-4}$  | -1.61           | 0.11                  |
|             | 6p21.32         | ENSG00000204308 | <i>RNF5</i>      | 7.53        | $5.0 \times 10^{-14}$ | 9.45                   | $3.6 \times 10^{-21}$ | 10.17           | $2.8 \times 10^{-24}$ |

|      |         |                 |                 |       |                       |       |                       |       |                       |
|------|---------|-----------------|-----------------|-------|-----------------------|-------|-----------------------|-------|-----------------------|
|      | 6p21.32 | ENSG00000204304 | <i>PBX2</i>     | 7.31  | 2.7×10 <sup>-13</sup> | 4.05  | 5.1×10 <sup>-5</sup>  | 4.05  | 5.1×10 <sup>-5</sup>  |
|      | 6p21.33 | ENSG00000204444 | <i>APOM</i>     | 7.30  | 2.8×10 <sup>-13</sup> | 7.16  | 7.8×10 <sup>-13</sup> | 6.14  | 8.2×10 <sup>-10</sup> |
|      | 6p21.32 | ENSG00000204310 | <i>AGPAT1</i>   | 7.30  | 3.0×10 <sup>-13</sup> | -7.57 | 3.7×10 <sup>-14</sup> | -     | -                     |
|      | 6p21.33 | ENSG00000204463 | <i>BAG6</i>     | -7.07 | 1.5×10 <sup>-12</sup> | 3.26  | 1.1×10 <sup>-3</sup>  | 2.51  | 0.012                 |
|      | 6p21.32 | ENSG00000204315 | <i>FKBPL</i>    | -6.74 | 1.6×10 <sup>-11</sup> | 4.81  | 1.5×10 <sup>-6</sup>  | -     | -                     |
|      | 6p21.33 | ENSG00000224389 | <i>C4B</i>      | -6.43 | 1.3×10 <sup>-10</sup> | -     | -                     | -     | -                     |
|      | 6p21.33 | ENSG00000231852 | <i>CYP21A2</i>  | -6.41 | 1.4×10 <sup>-10</sup> | -     | -                     | -     | -                     |
|      | 6p21.33 | ENSG00000213719 | <i>CLIC1</i>    | 6.21  | 5.3×10 <sup>-10</sup> | 6.21  | 5.3×10 <sup>-10</sup> | 6.98  | 3.0×10 <sup>-12</sup> |
|      | 6p21.33 | ENSG00000166278 | <i>C2</i>       | -6.21 | 5.3×10 <sup>-10</sup> | -     | -                     | -     | -                     |
|      | 6p21.33 | ENSG00000204386 | <i>NEU1</i>     | 6.14  | 8.2×10 <sup>-10</sup> | -     | -                     | -2.05 | 0.040                 |
|      | 6p21.33 | ENSG00000204536 | <i>CCHCR1</i>   | -5.94 | 2.9×10 <sup>-9</sup>  | -5.82 | 6.0×10 <sup>-9</sup>  | 3.30  | 9.7×10 <sup>-4</sup>  |
|      | 6p21.33 | ENSG00000227507 | <i>LTB</i>      | 5.77  | 7.8×10 <sup>-9</sup>  | -     | -                     | -     | -                     |
|      | 3q25.1  | ENSG00000169313 | <i>P2RY12</i>   | 5.53  | 3.3×10 <sup>-8</sup>  | 5.20  | 2.0×10 <sup>-7</sup>  | 5.20  | 2.0×10 <sup>-7</sup>  |
|      | 6p21.33 | ENSG00000244731 | <i>C4A</i>      | 5.30  | 1.2×10 <sup>-7</sup>  | 5.83  | 5.6×10 <sup>-9</sup>  | 7.18  | 6.8×10 <sup>-13</sup> |
|      | 6p21.32 | ENSG00000236104 | <i>ZBTB22</i>   | -5.13 | 2.9×10 <sup>-7</sup>  | -3.73 | 1.9×10 <sup>-4</sup>  | -     | -                     |
|      | 6p21.32 | ENSG00000204314 | <i>PRRT1</i>    | -5.02 | 5.1×10 <sup>-7</sup>  | -     | -                     | -9.99 | 1.6×10 <sup>-23</sup> |
|      | 6p21.33 | ENSG00000204396 | <i>VWA7</i>     | 4.96  | 7.0×10 <sup>-7</sup>  | -6.57 | 4.9×10 <sup>-11</sup> | 0.42  | 0.68                  |
|      | 6p21.32 | ENSG00000204209 | <i>DAXX</i>     | 4.94  | 7.8×10 <sup>-7</sup>  | 0.19  | 0.85                  | 4.55  | 5.3×10 <sup>-6</sup>  |
|      | 6p21.32 | ENSG00000237541 | <i>HLA-DQA2</i> | -4.84 | 1.3×10 <sup>-6</sup>  | -     | -                     | -     | -                     |
| EBV  | 6p21.32 | ENSG00000204257 | <i>HLA-DMA</i>  | -4.69 | 2.7×10 <sup>-6</sup>  | -4.54 | 5.5×10 <sup>-6</sup>  | 4.64  | 3.5×10 <sup>-6</sup>  |
| EBNA | 6p21.32 | ENSG00000227057 | <i>WDR46</i>    | -4.54 | 5.6×10 <sup>-6</sup>  | -1.86 | 0.063                 | -1.86 | 0.063                 |
|      | 6p21.33 | ENSG00000204366 | <i>ZBTB12</i>   | -4.44 | 8.9×10 <sup>-6</sup>  | 3.02  | 2.5×10 <sup>-3</sup>  | 0.26  | 0.80                  |
|      | 6p21.33 | ENSG00000204420 | <i>MPIG6B</i>   | -4.44 | 9.0×10 <sup>-6</sup>  | 2.89  | 3.8×10 <sup>-3</sup>  | 4.44  | 9.0×10 <sup>-6</sup>  |
|      | 6p21.33 | ENSG00000204344 | <i>STK19</i>    | 4.44  | 9.1×10 <sup>-6</sup>  | 1.21  | 0.23                  | -     | -                     |
|      | 6p21.32 | ENSG00000231925 | <i>TAPBP</i>    | -4.37 | 1.2×10 <sup>-5</sup>  | -5.18 | 2.3×10 <sup>-7</sup>  | 5.42  | 5.9×10 <sup>-8</sup>  |
|      | 6p22.1  | ENSG00000204625 | <i>HCG9</i>     | -4.25 | 2.1×10 <sup>-5</sup>  | -     | -                     | -     | -                     |
|      | 6p21.32 | ENSG00000196735 | <i>HLA-DQA1</i> | 4.18  | 2.9×10 <sup>-5</sup>  | 11.93 | 8.8×10 <sup>-33</sup> | 0.87  | 0.38                  |
|      | 6p21.32 | ENSG00000221988 | <i>PPT2</i>     | -3.72 | 2.0×10 <sup>-4</sup>  | -0.59 | 0.55                  | -6.36 | 2.0×10 <sup>-10</sup> |
|      | 6p22.1  | ENSG00000281831 | <i>HCP5B</i>    | -3.49 | 4.9×10 <sup>-4</sup>  | -4.24 | 2.3×10 <sup>-5</sup>  | -5.08 | 3.7×10 <sup>-7</sup>  |
|      | 6p21.33 | ENSG00000206344 | <i>HCG27</i>    | -3.22 | 1.3×10 <sup>-3</sup>  | 0.74  | 0.46                  | -5.86 | 4.6×10 <sup>-9</sup>  |
|      | 6p21.33 | ENSG00000232810 | <i>TNF</i>      | 3.06  | 2.2×10 <sup>-3</sup>  | 3.06  | 2.2×10 <sup>-3</sup>  | -7.43 | 1.1×10 <sup>-13</sup> |
|      | 6p21.33 | ENSG00000213760 | <i>ATP6V1G2</i> | -3.04 | 2.4×10 <sup>-3</sup>  | 3.58  | 3.5×10 <sup>-4</sup>  | -4.89 | 9.9×10 <sup>-7</sup>  |
|      | 6p21.32 | ENSG00000204252 | <i>HLA-DOA</i>  | 2.45  | 0.014                 | 7.80  | 6.3×10 <sup>-15</sup> | 1.84  | 0.066                 |
|      | 6p21.33 | ENSG00000204410 | <i>MSH5</i>     | -2.04 | 0.041                 | 5.27  | 1.4×10 <sup>-7</sup>  | 1.68  | 0.093                 |
|      | 6p21.32 | ENSG00000231389 | <i>HLA-DPA1</i> | -1.97 | 0.049                 | -5.49 | 4.1×10 <sup>-8</sup>  | 0.33  | 0.74                  |
|      | 6p21.32 | ENSG00000223865 | <i>HLA-DPB1</i> | 1.96  | 0.050                 | -6.35 | 2.1×10 <sup>-10</sup> | -     | -                     |
|      | 6p22.1  | ENSG00000234127 | <i>TRIM26</i>   | 1.34  | 0.18                  | -4.69 | 2.7×10 <sup>-6</sup>  | 1.34  | 0.18                  |
|      | 6p21.32 | ENSG00000242574 | <i>HLA-DMB</i>  | 1.22  | 0.22                  | -5.05 | 4.4×10 <sup>-7</sup>  | -3.61 | 3.1×10 <sup>-4</sup>  |
|      | 6p21.33 | ENSG00000204469 | <i>PRRC2A</i>   | -1.20 | 0.23                  | 0.62  | 0.53                  | -7.58 | 3.5×10 <sup>-14</sup> |
|      | 6p21.32 | ENSG00000204228 | <i>HSD17B8</i>  | 1.16  | 0.25                  | 4.63  | 3.7×10 <sup>-6</sup>  | 1.14  | 0.26                  |

|             |                 |                 |                  |                      |                       |                       |                       |                      |                       |
|-------------|-----------------|-----------------|------------------|----------------------|-----------------------|-----------------------|-----------------------|----------------------|-----------------------|
| EBV<br>EBNA | 6p21.33         | ENSG00000204388 | <i>HSPA1B</i>    | 1.05                 | 0.30                  | -                     | -                     | 4.46                 | 8.4×10 <sup>-6</sup>  |
|             | 6p21.33         | ENSG00000226979 | <i>LTA</i>       | -0.75                | 0.45                  | -5.76                 | 8.6×10 <sup>-9</sup>  | -5.71                | 1.1×10 <sup>-8</sup>  |
|             | 6p21.32         | ENSG00000204231 | <i>RXRΒ</i>      | -0.67                | 0.50                  | 4.54                  | 5.7×10 <sup>-6</sup>  | 0.67                 | 0.50                  |
|             | 3q25.1          | ENSG00000181631 | <i>P2RY13</i>    | 0.48                 | 0.63                  | 5.72                  | 1.1×10 <sup>-8</sup>  | -0.13                | 0.90                  |
|             | 6p21.32         | ENSG00000204301 | <i>NOTCH4</i>    | 0.36                 | 0.72                  | 4.41                  | 1.0×10 <sup>-5</sup>  | 2.12                 | 0.034                 |
|             | 6p21.33         | ENSG00000204389 | <i>HSPA1A</i>    | -                    | -                     | -                     | -                     | 8.81                 | 1.3×10 <sup>-18</sup> |
|             | 6p21.33         | ENSG00000204531 | <i>POU5F1</i>    | -                    | -                     | -4.32                 | 1.5×10 <sup>-5</sup>  | -6.23                | 4.7×10 <sup>-10</sup> |
|             | 6p21.32         | ENSG00000198502 | <i>HLA-DRB5</i>  | -                    | -                     | -                     | -                     | 5.24                 | 1.6×10 <sup>-7</sup>  |
|             | 6p21.33         | ENSG00000168631 | <i>DPCR1</i>     | -                    | -                     | -                     | -                     | 4.92                 | 8.5×10 <sup>-7</sup>  |
|             | 6p21.33         | ENSG00000204540 | <i>PSORS1C1</i>  | -                    | -                     | 4.89                  | 1.0×10 <sup>-6</sup>  | 4.91                 | 9.3×10 <sup>-7</sup>  |
|             | 6p21.33         | ENSG00000137337 | <i>MDC1</i>      | -                    | -                     | -                     | -                     | 4.73                 | 2.2×10 <sup>-6</sup>  |
|             | 6p21.32         | ENSG00000204287 | <i>HLA-DRA</i>   | -                    | -                     | -                     | -                     | 4.67                 | 3.0×10 <sup>-6</sup>  |
|             | 6p21.32         | ENSG00000168477 | <i>TNXB</i>      | -                    | -                     | -                     | -                     | 4.25                 | 2.2×10 <sup>-5</sup>  |
|             | 6p21.33         | ENSG00000228789 | <i>HCG22</i>     | -                    | -                     | -4.47                 | 7.7×10 <sup>-6</sup>  | 3.27                 | 1.1×10 <sup>-3</sup>  |
|             | 6p21.32         | ENSG00000196126 | <i>HLA-DRB1</i>  | -                    | -                     | 13.05                 | 6.7×10 <sup>-39</sup> | -                    | -                     |
|             | 6p22.1          | ENSG00000270604 | <i>HCG17</i>     | -                    | -                     | 4.16                  | 3.3×10 <sup>-5</sup>  | -                    | -                     |
|             | EBV p18         | 6p21.33         | ENSG00000213722  | <i>DDAH2</i>         | 9.74                  | 2.0×10 <sup>-22</sup> | 6.03                  | 1.6×10 <sup>-9</sup> | 1.85                  |
| 6p21.33     |                 | ENSG00000204371 | <i>EHMT2</i>     | 9.56                 | 1.2×10 <sup>-21</sup> | -                     | -                     | -                    | -                     |
| 6p21.32     |                 | ENSG00000204305 | <i>AGER</i>      | -8.39                | 4.8×10 <sup>-17</sup> | -8.90                 | 5.4×10 <sup>-19</sup> | -5.02                | 5.1×10 <sup>-7</sup>  |
| 6p21.33     |                 | ENSG00000204463 | <i>BAG6</i>      | -8.20                | 2.5×10 <sup>-16</sup> | -2.14                 | 0.032                 | -1.18                | 0.24                  |
| 6p21.33     |                 | ENSG00000204536 | <i>CCHCR1</i>    | -6.66                | 2.7×10 <sup>-11</sup> | -5.05                 | 4.4×10 <sup>-7</sup>  | 0.09                 | 0.93                  |
| 6p21.33     |                 | ENSG00000227507 | <i>LTB</i>       | 6.65                 | 3.0×10 <sup>-11</sup> | -                     | -                     | -                    | -                     |
| 6p21.33     |                 | ENSG00000213760 | <i>ATP6V1G2</i>  | -6.36                | 2.0×10 <sup>-10</sup> | 2.65                  | 8.1×10 <sup>-3</sup>  | -7.02                | 2.2×10 <sup>-12</sup> |
| 6p21.32     |                 | ENSG00000179344 | <i>HLA-DQB1</i>  | 5.79                 | 7.1×10 <sup>-9</sup>  | 5.74                  | 9.8×10 <sup>-9</sup>  | 4.65                 | 3.3×10 <sup>-6</sup>  |
| 6p21.33     |                 | ENSG00000137310 | <i>TCF19</i>     | -5.76                | 8.6×10 <sup>-9</sup>  | -3.44                 | 5.9×10 <sup>-4</sup>  | 3.65                 | 2.6×10 <sup>-4</sup>  |
| 6p21.32     |                 | ENSG00000204310 | <i>AGPAT1</i>    | 5.72                 | 1.1×10 <sup>-8</sup>  | -6.10                 | 1.1×10 <sup>-9</sup>  | -                    | -                     |
| 6p21.32     |                 | ENSG00000232629 | <i>HLA-DQB2</i>  | -5.61                | 2.1×10 <sup>-8</sup>  | -5.64                 | 1.7×10 <sup>-8</sup>  | -1.74                | 0.082                 |
| 6p21.33     |                 | ENSG00000214894 | <i>LINC00243</i> | -5.60                | 2.2×10 <sup>-8</sup>  | -                     | -                     | -0.16                | 0.87                  |
| 6p21.32     |                 | ENSG00000237541 | <i>HLA-DQA2</i>  | -5.41                | 6.5×10 <sup>-8</sup>  | -                     | -                     | -                    | -                     |
| 6p21.33     |                 | ENSG00000166278 | <i>C2</i>        | -5.35                | 8.9×10 <sup>-8</sup>  | -                     | -                     | -                    | -                     |
| 6p22.2      |                 | ENSG00000186470 | <i>BTN3A2</i>    | 5.33                 | 9.9×10 <sup>-8</sup>  | 5.05                  | 4.4×10 <sup>-7</sup>  | 5.25                 | 1.5×10 <sup>-7</sup>  |
| 6p21.33     |                 | ENSG00000213719 | <i>CLIC1</i>     | 5.31                 | 1.1×10 <sup>-7</sup>  | 5.31                  | 1.1×10 <sup>-7</sup>  | 6.84                 | 8.2×10 <sup>-12</sup> |
| 6p21.33     |                 | ENSG00000204386 | <i>NEU1</i>      | 5.26                 | 1.5×10 <sup>-7</sup>  | -                     | -                     | -1.05                | 0.29                  |
| 6p21.33     |                 | ENSG00000204396 | <i>VWA7</i>      | 5.21                 | 1.9×10 <sup>-7</sup>  | -6.23                 | 4.8×10 <sup>-10</sup> | 1.10                 | 0.27                  |
| 6p21.33     |                 | ENSG00000204469 | <i>PRRC2A</i>    | -5.16                | 2.4×10 <sup>-7</sup>  | 0.77                  | 0.44                  | -8.33                | 8.1×10 <sup>-17</sup> |
| 6p21.33     |                 | ENSG00000206344 | <i>HCG27</i>     | -5.11                | 3.3×10 <sup>-7</sup>  | -1.61                 | 0.11                  | -8.68                | 4.1×10 <sup>-18</sup> |
| 6p21.33     |                 | ENSG00000224389 | <i>C4B</i>       | -5.03                | 4.9×10 <sup>-7</sup>  | -                     | -                     | -                    | -                     |
| 6p21.33     |                 | ENSG00000204444 | <i>APOM</i>      | 4.97                 | 6.6×10 <sup>-7</sup>  | 4.83                  | 1.4-6                 | 5.38                 | 7.5×10 <sup>-8</sup>  |
| 6p21.33     |                 | ENSG00000231852 | <i>CYP21A2</i>   | -4.95                | 7.3×10 <sup>-7</sup>  | -                     | -                     | -                    | -                     |
| 6p21.32     | ENSG00000204304 | <i>PBX2</i>     | 4.83             | 1.4×10 <sup>-6</sup> | 0.20                  | 0.84                  | 0.20                  | 0.84                 |                       |

|         |          |                 |                          |       |                      |       |                       |        |                       |
|---------|----------|-----------------|--------------------------|-------|----------------------|-------|-----------------------|--------|-----------------------|
|         | 6p22.2   | ENSG00000124508 | <i>BTN2A2</i>            | -4.70 | 2.6×10 <sup>-6</sup> | -0.72 | 0.47                  | 5.06   | 4.2×10 <sup>-7</sup>  |
|         | 6p22.1   | ENSG00000261353 | <i>CTA-14H9.5</i>        | 4.67  | 3.0×10 <sup>-6</sup> | -     | -                     | -3.65  | 2.6×10 <sup>-4</sup>  |
|         | 6p22.1   | ENSG00000137185 | <i>ZSCAN9</i>            | 4.53  | 6.0×10 <sup>-6</sup> | -4.40 | 1.1×10 <sup>-5</sup>  | 4.40   | 1.1×10 <sup>-5</sup>  |
|         | 6p22.1   | ENSG00000197279 | <i>ZNF165</i>            | -4.50 | 6.9×10 <sup>-6</sup> | -0.76 | 0.45                  | -2.03  | 0.042                 |
|         | 6p22.1   | ENSG00000158691 | <i>ZSCAN12</i>           | 4.45  | 8.6×10 <sup>-6</sup> | -3.27 | 1.1×10 <sup>-3</sup>  | 4.46   | 8.1×10 <sup>-6</sup>  |
|         | 6p22.1   | ENSG00000187626 | <i>ZKSCAN4</i>           | -4.42 | 1.0×10 <sup>-5</sup> | -4.79 | 1.7×10 <sup>-6</sup>  | -4.79  | 1.7×10 <sup>-6</sup>  |
|         | 19q13.12 | ENSG00000126243 | <i>LRFN3</i>             | 4.34  | 1.4×10 <sup>-5</sup> | 4.14  | 3.5×10 <sup>-5</sup>  | 4.47   | 7.8×10 <sup>-6</sup>  |
|         | 9q21.11  | ENSG00000226337 | <i>RP11-274B18.4</i>     | -4.22 | 2.5×10 <sup>-5</sup> | -     | -                     | -      | -                     |
|         | 19q13.12 | ENSG00000011600 | <i>TYROBP</i>            | -4.22 | 2.5×10 <sup>-5</sup> | 4.22  | 2.5×10 <sup>-5</sup>  | -      | -                     |
|         | 6p22.1   | ENSG00000197062 | <i>ZSCAN26</i>           | 4.18  | 2.9×10 <sup>-5</sup> | 4.33  | 1.5×10 <sup>-5</sup>  | 3.86   | 1.1×10 <sup>-4</sup>  |
|         | 6p22.1   | ENSG00000272468 | <i>RP1-86C11.7</i>       | 4.17  | 3.1×10 <sup>-5</sup> | -0.93 | 0.35                  | -      | -                     |
|         | 6p21.32  | ENSG00000204257 | <i>HLA-DMA</i>           | -4.15 | 3.4×10 <sup>-5</sup> | -4.11 | 3.9×10 <sup>-5</sup>  | 4.16   | 3.2×10 <sup>-5</sup>  |
|         | 6p22.1   | ENSG00000204613 | <i>TRIM10</i>            | 4.10  | 4.2×10 <sup>-5</sup> | -     | -                     | -      | -                     |
|         | 6p21.33  | ENSG00000244731 | <i>C4A</i>               | 4.01  | 6.1×10 <sup>-5</sup> | 4.24  | 2.2×10 <sup>-5</sup>  | 5.60   | 2.2×10 <sup>-8</sup>  |
|         | 6p21.32  | ENSG00000241106 | <i>HLA-DOB</i>           | 3.97  | 7.1×10 <sup>-5</sup> | 4.54  | 5.6×10 <sup>-6</sup>  | -1.10  | 0.27                  |
|         | 6p21.33  | ENSG00000204435 | <i>CSNK2B</i>            | -3.97 | 7.1×10 <sup>-5</sup> | 6.41  | 1.4×10 <sup>-10</sup> | -3.45  | 5.5×10 <sup>-4</sup>  |
|         | 6p21.32  | ENSG00000204301 | <i>NOTCH4</i>            | -3.93 | 8.4×10 <sup>-5</sup> | 4.70  | 2.6×10 <sup>-6</sup>  | 0.84   | 0.40                  |
|         | 6p21.32  | ENSG00000204308 | <i>RNF5</i>              | 3.66  | 2.5×10 <sup>-4</sup> | 5.59  | 2.3×10 <sup>-8</sup>  | 5.96   | 2.5×10 <sup>-9</sup>  |
|         | 6p21.33  | ENSG00000204516 | <i>MICB</i>              | -3.62 | 3.0×10 <sup>-4</sup> | 2.97  | 3.0×10 <sup>-3</sup>  | -8.06  | 7.4×10 <sup>-16</sup> |
| EBV p18 | 6p22.1   | ENSG00000233822 | <i>HIST1H2BN</i>         | 3.36  | 7.8×10 <sup>-4</sup> | 0.83  | 0.41                  | 4.69   | 2.8×10 <sup>-6</sup>  |
|         | 6p21.32  | ENSG00000204267 | <i>TAP2</i>              | -3.09 | 2.0×10 <sup>-3</sup> | -4.22 | 2.4×10 <sup>-5</sup>  | -4.09  | 4.2×10 <sup>-5</sup>  |
|         | 6p21.33  | ENSG00000204387 | <i>C6orf48</i>           | 3.04  | 2.3×10 <sup>-3</sup> | 3.78  | 1.5×10 <sup>-4</sup>  | 4.85   | 1.2×10 <sup>-6</sup>  |
|         | 6p21.33  | ENSG00000204482 | <i>LST1</i>              | 3.00  | 2.7×10 <sup>-3</sup> | -     | -                     | -4.52  | 6.1×10 <sup>-6</sup>  |
|         | 6p21.33  | ENSG00000204520 | <i>MICA</i>              | 2.52  | 0.012                | 1.90  | 0.057                 | 5.60   | 2.1×10 <sup>-8</sup>  |
|         | 6p21.33  | ENSG00000272221 | <i>XXbac-BPG181B23.7</i> | 2.09  | 0.037                | 4.52  | 6.1×10 <sup>-6</sup>  | -0.37  | 0.71                  |
|         | 6p21.32  | ENSG00000204228 | <i>HSD17B8</i>           | 1.87  | 0.062                | 4.81  | 1.5×10 <sup>-6</sup>  | 2.47   | 0.014                 |
|         | 5q31.1   | ENSG00000164402 | <i>SEPTIN8</i>           | 1.65  | 0.098                | 4.42  | 9.9×10 <sup>-6</sup>  | -1.95  | 0.051                 |
|         | 6p21.32  | ENSG00000204252 | <i>HLA-DOA</i>           | -1.34 | 0.18                 | 6.56  | 5.5×10 <sup>-11</sup> | -1.13  | 0.26                  |
|         | 6p22.2   | ENSG00000111801 | <i>BTN3A3</i>            | -0.93 | 0.35                 | -4.68 | 2.8×10 <sup>-6</sup>  | 0.25   | 0.80                  |
|         | 6p21.32  | ENSG00000242574 | <i>HLA-DMB</i>           | -0.87 | 0.38                 | -4.40 | 1.1×10 <sup>-5</sup>  | -3.24  | 1.2×10 <sup>-3</sup>  |
|         | 6p21.33  | ENSG00000204472 | <i>AIF1</i>              | 0.86  | 0.39                 | -3.01 | 2.6×10 <sup>-3</sup>  | -4.21  | 2.6×10 <sup>-5</sup>  |
|         | 6p21.32  | ENSG00000204314 | <i>PRRT1</i>             | 0.68  | 0.50                 | -     | -                     | -5.91  | 3.5×10 <sup>-9</sup>  |
|         | 6p21.33  | ENSG00000226979 | <i>LTA</i>               | -0.65 | 0.51                 | -6.72 | 1.8×10 <sup>-11</sup> | -6.64  | 3.1×10 <sup>-11</sup> |
|         | 6p22.1   | ENSG00000198315 | <i>ZKSCAN8</i>           | 0.62  | 0.53                 | 5.15  | 2.7×10 <sup>-7</sup>  | -0.01  | 1.00                  |
|         | 6p21.32  | ENSG00000204248 | <i>COL11A2</i>           | -0.60 | 0.55                 | 4.15  | 3.3×10 <sup>-5</sup>  | 1.64   | 0.10                  |
|         | 6p21.32  | ENSG00000196735 | <i>HLA-DQA1</i>          | 0.50  | 0.62                 | 6.81  | 1.0×10 <sup>-11</sup> | 1.01   | 0.31                  |
|         | 6p21.33  | ENSG00000232810 | <i>TNF</i>               | 0.48  | 0.63                 | 0.48  | 0.63                  | -10.43 | 1.8×10 <sup>-25</sup> |
|         | 22q13.1  | ENSG00000278195 | <i>SSTR3</i>             | 0.23  | 0.82                 | -4.70 | 2.6×10 <sup>-6</sup>  | 1.23   | 0.22                  |
|         | 6p21.33  | ENSG00000204531 | <i>POU5F1</i>            | -     | -                    | -5.64 | 1.7×10 <sup>-8</sup>  | -5.84  | 5.2×10 <sup>-9</sup>  |

|           |                 |                 |                  |                      |                       |                      |                       |                      |                       |
|-----------|-----------------|-----------------|------------------|----------------------|-----------------------|----------------------|-----------------------|----------------------|-----------------------|
| EBV p18   | 6p21.33         | ENSG00000228022 | <i>HCG20</i>     | -                    | -                     | 5.10                 | 3.4×10 <sup>-7</sup>  | 5.70                 | 1.2×10 <sup>-8</sup>  |
|           | 6p21.33         | ENSG00000204389 | <i>HSPA1A</i>    | -                    | -                     | -                    | -                     | 5.65                 | 1.6×10 <sup>-8</sup>  |
|           | 6p22.1          | ENSG00000184357 | <i>HIST1H1B</i>  | -                    | -                     | -                    | -                     | -4.85                | 1.2×10 <sup>-6</sup>  |
|           | 6p21.33         | ENSG00000137337 | <i>MDC1</i>      | -                    | -                     | -                    | -                     | 4.76                 | 1.9×10 <sup>-6</sup>  |
|           | 6p21.33         | ENSG00000204540 | <i>PSORS1C1</i>  | -                    | -                     | 4.99                 | 6.0×10 <sup>-7</sup>  | 4.15                 | 3.3×10 <sup>-5</sup>  |
|           | 6p21.33         | ENSG00000168631 | <i>DPCR1</i>     | -                    | -                     | -                    | -                     | 4.10                 | 4.1×10 <sup>-5</sup>  |
|           | 6p21.33         | ENSG00000228789 | <i>HCG22</i>     | -                    | -                     | -4.33                | 1.5×10 <sup>-5</sup>  | 3.03                 | 2.4×10 <sup>-3</sup>  |
|           | 6p21.32         | ENSG00000196126 | <i>HLA-DRB1</i>  | -                    | -                     | 7.02                 | 2.2×10 <sup>-12</sup> | -                    | -                     |
|           | 6p21.32         | ENSG00000232629 | <i>HLA-DQB2</i>  | 8.87                 | 7.6×10 <sup>-19</sup> | 8.54                 | 1.4×10 <sup>-17</sup> | 5.29                 | 1.3×10 <sup>-7</sup>  |
|           | 6p21.32         | ENSG00000179344 | <i>HLA-DQB1</i>  | -8.56                | 1.1×10 <sup>-17</sup> | 1.04                 | 0.30                  | -11.40               | 4.1×10 <sup>-30</sup> |
|           | 6p21.32         | ENSG00000204257 | <i>HLA-DMA</i>   | -7.28                | 3.4×10 <sup>-13</sup> | -7.45                | 9.5×10 <sup>-14</sup> | 7.32                 | 2.6×10 <sup>-13</sup> |
|           | 6p21.33         | ENSG00000214894 | <i>LINC00243</i> | -6.89                | 5.6×10 <sup>-12</sup> | -                    | -                     | -0.22                | 0.82                  |
|           | 6p21.33         | ENSG00000244731 | <i>C4A</i>       | 6.80                 | 1.1×10 <sup>-11</sup> | 6.46                 | 1.0×10 <sup>-10</sup> | 6.54                 | 6.0×10 <sup>-11</sup> |
|           | 6p21.33         | ENSG00000166278 | <i>C2</i>        | -6.42                | 1.4×10 <sup>-10</sup> | -                    | -                     | -                    | -                     |
|           | 6p21.33         | ENSG00000204386 | <i>NEU1</i>      | 6.39                 | 1.6×10 <sup>-10</sup> | -                    | -                     | -2.35                | 0.019                 |
|           | 6p21.33         | ENSG00000213719 | <i>CLIC1</i>     | 6.20                 | 5.6×10 <sup>-10</sup> | 6.20                 | 5.6×10 <sup>-10</sup> | -0.45                | 0.65                  |
|           | 6p21.33         | ENSG00000224389 | <i>C4B</i>       | -6.17                | 7.0×10 <sup>-10</sup> | -                    | -                     | -                    | -                     |
|           | 6p21.33         | ENSG00000231852 | <i>CYP21A2</i>   | -6.16                | 7.5×10 <sup>-10</sup> | -                    | -                     | -                    | -                     |
|           | 6p21.33         | ENSG00000204444 | <i>APOM</i>      | 6.13                 | 8.6×10 <sup>-10</sup> | 5.97                 | 2.3×10 <sup>-9</sup>  | 6.18                 | 6.6×10 <sup>-10</sup> |
|           | 6p21.33         | ENSG00000228727 | <i>SAPCD1</i>    | -6.06                | 1.4×10 <sup>-9</sup>  | -1.18                | 0.24                  | -6.06                | 1.4×10 <sup>-9</sup>  |
|           | 6p21.33         | ENSG00000146112 | <i>PPP1R18</i>   | -5.71                | 1.1×10 <sup>-8</sup>  | 0.84                 | 0.40                  | -5.77                | 8.1×10 <sup>-9</sup>  |
|           | 6p21.33         | ENSG00000204351 | <i>SKIV2L</i>    | 5.70                 | 1.2×10 <sup>-8</sup>  | 5.76                 | 8.2×10 <sup>-9</sup>  | 6.13                 | 8.7×10 <sup>-10</sup> |
|           | 6p21.33         | ENSG00000204396 | <i>VWA7</i>      | 5.49                 | 4.0×10 <sup>-8</sup>  | -4.62                | 3.9×10 <sup>-6</sup>  | 4.31                 | 1.6×10 <sup>-5</sup>  |
| EBV ZEBRA | 6p21.33         | ENSG00000204392 | <i>LSM2</i>      | -5.43                | 5.7×10 <sup>-8</sup>  | -5.01                | 5.4×10 <sup>-7</sup>  | -5.01                | 5.4×10 <sup>-7</sup>  |
|           | 6p21.33         | ENSG00000227507 | <i>LTB</i>       | 5.28                 | 1.3×10 <sup>-7</sup>  | -                    | -                     | -                    | -                     |
|           | 6p21.33         | ENSG00000204388 | <i>HSPA1B</i>    | -5.27                | 1.4×10 <sup>-7</sup>  | -                    | -                     | -2.17                | 0.030                 |
|           | 6p21.33         | ENSG00000204564 | <i>C6orf136</i>  | 5.06                 | 4.1×10 <sup>-7</sup>  | 0.38                 | 0.70                  | 5.05                 | 4.4×10 <sup>-7</sup>  |
|           | 6p21.32         | ENSG00000204315 | <i>FKBPL</i>     | 5.03                 | 4.9×10 <sup>-7</sup>  | -0.60                | 0.55                  | -                    | -                     |
|           | 6p21.32         | ENSG00000204252 | <i>HLA-DOA</i>   | -4.98                | 6.5×10 <sup>-7</sup>  | 1.48                 | 0.14                  | -4.95                | 7.5×10 <sup>-7</sup>  |
|           | 6p21.33         | ENSG00000204536 | <i>CCHCR1</i>    | -4.96                | 7.0×10 <sup>-7</sup>  | -5.72                | 1.1×10 <sup>-8</sup>  | -1.37                | 0.17                  |
|           | 6p21.33         | ENSG00000204463 | <i>BAG6</i>      | -4.86                | 1.2×10 <sup>-6</sup>  | 0.80                 | 0.42                  | 1.20                 | 0.23                  |
|           | 6p22.1          | ENSG00000204592 | <i>HLA-E</i>     | -4.66                | 3.2×10 <sup>-6</sup>  | -4.66                | 3.2×10 <sup>-6</sup>  | -4.66                | 3.2×10 <sup>-6</sup>  |
|           | 6p22.1          | ENSG00000204613 | <i>TRIM10</i>    | 4.60                 | 4.2×10 <sup>-6</sup>  | -                    | -                     | -                    | -                     |
|           | 6p21.33         | ENSG00000204525 | <i>HLA-C</i>     | -4.60                | 4.3×10 <sup>-6</sup>  | 1.19                 | 0.23                  | -5.39                | 7.1×10 <sup>-8</sup>  |
|           | 6p21.32         | ENSG00000196735 | <i>HLA-DQA1</i>  | -4.57                | 5.0×10 <sup>-6</sup>  | -6.72                | 1.8×10 <sup>-11</sup> | -4.09                | 4.4×10 <sup>-5</sup>  |
|           | 22q11.21        | ENSG00000185608 | <i>MRPL40</i>    | 4.49                 | 7.1×10 <sup>-6</sup>  | 3.96                 | 7.5×10 <sup>-5</sup>  | 4.48                 | 7.5×10 <sup>-6</sup>  |
|           | 4q24            | ENSG00000109320 | <i>NFKB1</i>     | -4.37                | 1.2×10 <sup>-5</sup>  | 3.88                 | 1.1×10 <sup>-4</sup>  | 0.94                 | 0.35                  |
|           | 6p21.33         | ENSG00000204394 | <i>VARS</i>      | 4.32                 | 1.5×10 <sup>-5</sup>  | 0.44                 | 0.66                  | 0.44                 | 0.66                  |
|           | 6p22.1          | ENSG00000281831 | <i>HCP5B</i>     | -4.29                | 1.8×10 <sup>-5</sup>  | -5.24                | 1.6×10 <sup>-7</sup>  | -4.40                | 1.1×10 <sup>-5</sup>  |
| 6p21.32   | ENSG00000241404 | <i>EGFL8</i>    | -4.26            | 2.0×10 <sup>-5</sup> | -2.58                 | 9.8×10 <sup>-3</sup> | -4.90                 | 9.6×10 <sup>-7</sup> |                       |

EBV  
ZEBRA

|         |                 |                     |       |                      |        |                       |        |                       |
|---------|-----------------|---------------------|-------|----------------------|--------|-----------------------|--------|-----------------------|
| 6p22.1  | ENSG00000204625 | <i>HCG9</i>         | -4.16 | 3.1×10 <sup>-5</sup> | -      | -                     | -      | -                     |
| 6p21.33 | ENSG00000204356 | <i>NELFE</i>        | -4.14 | 3.4×10 <sup>-5</sup> | 0.77   | 0.44                  | -      | -                     |
| 6p22.1  | ENSG00000158691 | <i>ZSCAN12</i>      | 4.10  | 4.1×10 <sup>-5</sup> | -0.49  | 0.63                  | 3.19   | 1.4×10 <sup>-3</sup>  |
| 6p21.33 | ENSG00000204428 | <i>LY6G5C</i>       | -3.48 | 5.1×10 <sup>-4</sup> | -3.48  | 5.1×10 <sup>-4</sup>  | -6.49  | 8.8×10 <sup>-11</sup> |
| 6p22.1  | ENSG00000204619 | <i>PPP1R11</i>      | 3.39  | 7.1×10 <sup>-4</sup> | 0.08   | 0.94                  | 5.08   | 3.8×10 <sup>-7</sup>  |
| 6p21.33 | ENSG00000204438 | <i>GPANK1</i>       | 2.81  | 4.9×10 <sup>-3</sup> | 2.21   | 0.027                 | 4.36   | 1.3×10 <sup>-5</sup>  |
| 6p21.32 | ENSG00000242574 | <i>HLA-DMB</i>      | 2.70  | 6.9×10 <sup>-3</sup> | -7.33  | 2.3×10 <sup>-13</sup> | 0.72   | 0.47                  |
| 6p21.32 | ENSG00000204261 | <i>PSMB8-AS1</i>    | -2.67 | 7.6×10 <sup>-3</sup> | 2.36   | 0.018                 | 4.26   | 2.0×10 <sup>-5</sup>  |
| 6p21.32 | ENSG00000204267 | <i>TAP2</i>         | -2.21 | 0.027                | -4.76  | 2.0×10 <sup>-6</sup>  | -3.92  | 9.0×10 <sup>-5</sup>  |
| 6p21.33 | ENSG00000226979 | <i>LTA</i>          | 2.05  | 0.040                | -6.15  | 7.6×10 <sup>-10</sup> | -5.29  | 1.3×10 <sup>-7</sup>  |
| 6p22.1  | ENSG00000198315 | <i>ZKSCAN8</i>      | 2.00  | 0.046                | 4.54   | 5.7×10 <sup>-6</sup>  | -0.78  | 0.44                  |
| 6p21.32 | ENSG00000231389 | <i>HLA-DPA1</i>     | 1.75  | 0.079                | 5.52   | 3.5×10 <sup>-8</sup>  | 2.44   | 0.015                 |
| 6p21.33 | ENSG00000204482 | <i>LST1</i>         | 1.53  | 0.13                 | -      | -                     | -6.81  | 1.0×10 <sup>-11</sup> |
| 6p21.33 | ENSG00000213760 | <i>ATP6V1G2</i>     | 1.44  | 0.15                 | 4.23   | 2.4×10 <sup>-5</sup>  | 2.55   | 0.011                 |
| 6p21.33 | ENSG00000204435 | <i>CSNK2B</i>       | -1.25 | 0.21                 | 4.91   | 9.3×10 <sup>-7</sup>  | -3.55  | 3.9×10 <sup>-4</sup>  |
| 6p21.33 | ENSG00000204410 | <i>MSH5</i>         | -0.82 | 0.41                 | 5.67   | 1.4×10 <sup>-8</sup>  | -0.02  | 0.98                  |
| 6p21.32 | ENSG00000221988 | <i>PPT2</i>         | -0.59 | 0.55                 | 4.90   | 9.6×10 <sup>-7</sup>  | -3.68  | 2.3×10 <sup>-4</sup>  |
| 6p21.33 | ENSG00000137312 | <i>FLOT1</i>        | 0.54  | 0.59                 | -5.77  | 8.1×10 <sup>-9</sup>  | -1.41  | 0.16                  |
| 6p21.32 | ENSG00000198502 | <i>HLA-DRB5</i>     | -     | -                    | -      | -                     | -14.09 | 4.2×10 <sup>-45</sup> |
| 6p21.32 | ENSG00000204287 | <i>HLA-DRA</i>      | -     | -                    | -      | -                     | 8.48   | 2.2×10 <sup>-17</sup> |
| 6p21.33 | ENSG00000204531 | <i>POU5F1</i>       | -     | -                    | 0.64   | 0.52                  | -6.11  | 9.9×10 <sup>-10</sup> |
| 6p21.33 | ENSG00000204574 | <i>ABCF1</i>        | -     | -                    | -      | -                     | -5.74  | 9.3×10 <sup>-9</sup>  |
| 6p21.33 | ENSG00000204540 | <i>PSORS1C1</i>     | -     | -                    | 6.24   | 4.4×10 <sup>-10</sup> | 5.25   | 1.5×10 <sup>-7</sup>  |
| 6p21.32 | ENSG00000168394 | <i>TAP1</i>         | -     | -                    | -2.30  | 0.022                 | 4.76   | 2.0×10 <sup>-6</sup>  |
| 6p21.33 | ENSG00000228022 | <i>HCG20</i>        | -     | -                    | 5.05   | 4.4×10 <sup>-7</sup>  | 3.92   | 8.9×10 <sup>-5</sup>  |
| 6p21.32 | ENSG00000196126 | <i>HLA-DRB1</i>     | -     | -                    | -12.01 | 3.3×10 <sup>-33</sup> | -      | -                     |
| 6p22.1  | ENSG00000271755 | <i>RP1-153G14.4</i> | -     | -                    | 4.16   | 3.2×10 <sup>-5</sup>  | -      | -                     |



**Table S26:** TWAS results for MCV antigen response using gene expression models based on whole blood, brain, and skin tissues. Associations with  $P_{TWAS} < 4.2 \times 10^{-6}$  are considered statistically significant and genes with  $P_{TWAS} < 4.5 \times 10^{-5}$  are considered suggestive.

| Region  | Gene ID         | Gene            | Whole Blood |                      | Brain (Frontal Cortex) |                       | Skin (Sun Exposed) |                       | Skin (Sun Unexposed) |                       |
|---------|-----------------|-----------------|-------------|----------------------|------------------------|-----------------------|--------------------|-----------------------|----------------------|-----------------------|
|         |                 |                 | Z           | $P_{TWAS}$           | Z                      | $P_{TWAS}$            | Z                  | $P_{TWAS}$            | Z                    | $P_{TWAS}$            |
| 6p21.33 | ENSG00000204396 | <i>VWA7</i>     | -5.89       | $4.0 \times 10^{-9}$ | 5.42                   | $6.0 \times 10^{-8}$  | -4.91              | $9.0 \times 10^{-7}$  | -4.85                | $1.2 \times 10^{-6}$  |
| 6p21.33 | ENSG00000204371 | <i>EHMT2</i>    | -5.88       | $4.0 \times 10^{-9}$ | -                      | -                     | -2.68              | $7.5 \times 10^{-3}$  | -2.66                | $7.9 \times 10^{-3}$  |
| 6p21.33 | ENSG00000204564 | <i>C6orf136</i> | -5.76       | $8.2 \times 10^{-9}$ | -0.97                  | 0.33                  | -2.75              | $6.0 \times 10^{-3}$  | -2.58                | $9.9 \times 10^{-3}$  |
| 6p21.33 | ENSG00000213722 | <i>DDAH2</i>    | -5.68       | $1.4 \times 10^{-8}$ | -1.49                  | 0.14                  | -3.94              | $8.2 \times 10^{-5}$  | -                    | -                     |
| 5q31.2  | ENSG00000170464 | <i>DNAJC18</i>  | 4.82        | $1.5 \times 10^{-6}$ | 6.07                   | $1.3 \times 10^{-9}$  | 3.39               | $6.9 \times 10^{-4}$  | 3.40                 | $6.7 \times 10^{-4}$  |
| 6p21.33 | ENSG00000227507 | <i>LTB</i>      | -4.72       | $2.3 \times 10^{-6}$ | -                      | -                     | -                  | -                     | -                    | -                     |
| 5q31.2  | ENSG00000228672 | <i>PROB1</i>    | -4.64       | $3.6 \times 10^{-6}$ | -3.29                  | $1.0 \times 10^{-3}$  | -                  | -                     | -6.75                | $1.5 \times 10^{-11}$ |
| 6p21.33 | ENSG00000204388 | <i>HSPA1B</i>   | -4.48       | $7.4 \times 10^{-6}$ | -                      | -                     | -                  | -                     | -                    | -                     |
| 6p22.1  | ENSG00000204599 | <i>TRIM39</i>   | -4.36       | $1.3 \times 10^{-5}$ | -0.43                  | 0.67                  | 0.20               | 0.84                  | -0.11                | 0.91                  |
| 5q31.2  | ENSG00000170482 | <i>SLC23A1</i>  | -4.34       | $1.4 \times 10^{-5}$ | -4.07                  | $4.7 \times 10^{-5}$  | 4.39               | $1.1 \times 10^{-5}$  | 4.07                 | $4.7 \times 10^{-5}$  |
| 5q31.2  | ENSG00000170469 | <i>SPATA24</i>  | 4.20        | $2.7 \times 10^{-5}$ | -                      | -                     | 4.30               | $1.7 \times 10^{-5}$  | 4.29                 | $1.8 \times 10^{-5}$  |
| 6p22.1  | ENSG00000204632 | <i>HLA-G</i>    | 4.11        | $3.9 \times 10^{-5}$ | -1.45                  | 0.15                  | 0.19               | 0.85                  | 0.11                 | 0.92                  |
| 5q31.2  | ENSG00000184584 | <i>TMEM173</i>  | -4.08       | $4.5 \times 10^{-5}$ | -4.28                  | $1.9 \times 10^{-5}$  | -4.17              | $3.0 \times 10^{-5}$  | -4.20                | $2.6 \times 10^{-5}$  |
| 6p21.32 | ENSG00000241106 | <i>HLA-DOB</i>  | -3.84       | $1.2 \times 10^{-4}$ | -5.30                  | $1.2 \times 10^{-7}$  | -3.59              | $3.3 \times 10^{-4}$  | -4.73                | $2.3 \times 10^{-6}$  |
| 6p22.1  | ENSG00000204619 | <i>PPP1R11</i>  | -3.46       | $5.4 \times 10^{-4}$ | 0.64                   | 0.52                  | 4.21               | $2.5 \times 10^{-5}$  | 4.20                 | $2.7 \times 10^{-5}$  |
| 6p21.32 | ENSG00000204267 | <i>TAP2</i>     | 3.32        | $9.1 \times 10^{-4}$ | 3.11                   | $1.9 \times 10^{-3}$  | 5.52               | $3.4 \times 10^{-8}$  | 3.18                 | $1.5 \times 10^{-3}$  |
| 6p21.33 | ENSG00000226979 | <i>LTA</i>      | 2.94        | $3.3 \times 10^{-3}$ | 5.07                   | $4.0 \times 10^{-7}$  | 0.88               | 0.38                  | 1.33                 | 0.18                  |
| 6p21.32 | ENSG00000204314 | <i>PRRT1</i>    | -2.80       | $5.1 \times 10^{-3}$ | -                      | -                     | 5.75               | $9.2 \times 10^{-9}$  | 5.72                 | $1.1 \times 10^{-8}$  |
| 5q31.2  | ENSG00000249751 | <i>ECSCR</i>    | 2.38        | 0.018                | 7.83                   | $5.0 \times 10^{-15}$ | 7.25               | $4.2 \times 10^{-13}$ | 7.83                 | $5.0 \times 10^{-15}$ |
| 6p22.1  | ENSG00000234127 | <i>TRIM26</i>   | -2.24       | 0.025                | -1.64                  | 0.10                  | -6.21              | $5.3 \times 10^{-10}$ | -5.47                | $4.6 \times 10^{-8}$  |
| 6p21.33 | ENSG00000204498 | <i>NFKBIL1</i>  | -2.19       | 0.029                | -1.94                  | 0.052                 | -4.16              | $3.2 \times 10^{-5}$  | -3.32                | $9.0 \times 10^{-4}$  |
| 6p21.32 | ENSG00000204305 | <i>AGER</i>     | 0.91        | 0.36                 | 5.83                   | $5.6 \times 10^{-9}$  | 1.87               | 0.062                 | 0.28                 | 0.78                  |
| 5q31.2  | ENSG00000131508 | <i>UBE2D2</i>   | -           | -                    | 4.33                   | $1.5 \times 10^{-5}$  | -                  | -                     | -                    | -                     |

**Table S27:** TWAS results for seropositivity using gene expression models based on whole blood, brain, and skin tissues. Only statistically significant associations with  $P_{\text{TWAS}} < 4.2 \times 10^{-6}$  are presented.

| Antigen                   | Region  | Gene ID         | Gene            | Whole Blood |                       | Brain (Frontal Cortex) |                       |
|---------------------------|---------|-----------------|-----------------|-------------|-----------------------|------------------------|-----------------------|
|                           |         |                 |                 | Z           | $P_{\text{TWAS}}$     | Z                      | $P_{\text{TWAS}}$     |
| EBV<br>EA-D <sup>1</sup>  | 6p21.33 | ENSG00000204388 | <i>HSPA1B</i>   | -6.33       | $2.5 \times 10^{-10}$ | -                      | -                     |
|                           | 6p21.33 | ENSG00000204371 | <i>EHMT2</i>    | -5.77       | $8.0 \times 10^{-9}$  | -                      | -                     |
|                           | 6p21.33 | ENSG00000244731 | <i>C4A</i>      | 5.58        | $2.4 \times 10^{-8}$  | 5.27                   | $1.4 \times 10^{-7}$  |
|                           | 6p21.33 | ENSG00000166278 | <i>C2</i>       | -4.88       | $1.0 \times 10^{-6}$  | -                      | -                     |
|                           | 6p21.33 | ENSG00000204469 | <i>PRRC2A</i>   | 4.84        | $1.3 \times 10^{-6}$  | -                      | -                     |
|                           | 6p21.33 | ENSG00000231852 | <i>CYP21A2</i>  | -4.78       | $1.7 \times 10^{-6}$  | -                      | -                     |
|                           | 6p21.33 | ENSG00000213719 | <i>CLIC1</i>    | 4.76        | $2.0 \times 10^{-6}$  | 4.76                   | $2.0 \times 10^{-6}$  |
|                           | 6p21.33 | ENSG00000224389 | <i>C4B</i>      | -4.76       | $2.0 \times 10^{-6}$  | -                      | -                     |
|                           | 6p21.33 | ENSG00000204386 | <i>NEU1</i>     | 4.75        | $2.1 \times 10^{-6}$  | -                      | -                     |
|                           | 6p22.3  | ENSG00000137177 | <i>KIF13A</i>   | -4.65       | $3.3 \times 10^{-6}$  | -                      | -                     |
|                           | 6p21.32 | ENSG00000196126 | <i>HLA-DRB1</i> | -           | -                     | -6.87                  | $6.4 \times 10^{-12}$ |
|                           | 6p21.32 | ENSG00000204305 | <i>AGER</i>     | -           | -                     | 5.77                   | $8.1 \times 10^{-9}$  |
|                           | 6p21.33 | ENSG00000204420 | <i>MPIG6B</i>   | -           | -                     | 4.71                   | $2.5 \times 10^{-6}$  |
|                           | 6p21.32 | ENSG00000213676 | <i>ATF6B</i>    | -           | -                     | 4.80                   | $1.6 \times 10^{-6}$  |
| EBV<br>EBNA <sup>1</sup>  | 6p21.32 | ENSG00000179344 | <i>HLA-DQB1</i> | 8.37        | $5.6 \times 10^{-17}$ | -                      | -                     |
|                           | 6p21.32 | ENSG00000232629 | <i>HLA-DQB2</i> | -8.10       | $5.7 \times 10^{-16}$ | -7.95                  | $1.9 \times 10^{-15}$ |
|                           | 6p21.32 | ENSG00000237541 | <i>HLA-DQA2</i> | -5.46       | $4.8 \times 10^{-8}$  | -                      | -                     |
|                           | 6p21.32 | ENSG00000196126 | <i>HLA-DRB1</i> | -           | -                     | 7.78                   | $7.0 \times 10^{-15}$ |
|                           | 6p21.32 | ENSG00000196735 | <i>HLA-DQA1</i> | -           | -                     | 6.91                   | $4.7 \times 10^{-12}$ |
|                           | 6p21.32 | ENSG00000204252 | <i>HLA-DOA</i>  | -           | -                     | 4.79                   | $1.7 \times 10^{-6}$  |
|                           | 6p21.32 | ENSG00000231389 | <i>HLA-DPA1</i> | -           | -                     | -5.20                  | $2.0 \times 10^{-7}$  |
| EBV<br>ZEBRA <sup>1</sup> | 6p21.33 | ENSG00000244731 | <i>C4A</i>      | 4.64        | $3.5 \times 10^{-6}$  | -                      | -                     |
|                           | 6p21.32 | ENSG00000196126 | <i>HLA-DRB1</i> | -           | -                     | -5.95                  | $2.7 \times 10^{-9}$  |
| VZV <sup>1</sup>          | 4p15.2  | ENSG00000109680 | <i>TBC1D19</i>  | -4.96       | $7.2 \times 10^{-7}$  | -                      | -                     |
| JCV                       | 6p21.32 | ENSG00000237541 | <i>HLA-DQA2</i> | 9.68        | $3.5 \times 10^{-22}$ | -                      | -                     |
|                           | 6p21.33 | ENSG00000204371 | <i>EHMT2</i>    | -9.30       | $1.4 \times 10^{-20}$ | -                      | -                     |
|                           | 6p21.32 | ENSG00000179344 | <i>HLA-DQB1</i> | -8.05       | $8.4 \times 10^{-16}$ | -                      | -                     |
|                           | 6p21.32 | ENSG00000232629 | <i>HLA-DQB2</i> | 7.98        | $1.5 \times 10^{-15}$ | 7.85                   | $4.3 \times 10^{-15}$ |
|                           | 6p21.32 | ENSG00000204305 | <i>AGER</i>     | 7.82        | $5.3 \times 10^{-15}$ | 10.39                  | $2.8 \times 10^{-25}$ |
|                           | 6p21.33 | ENSG00000213722 | <i>DDAH2</i>    | -7.46       | $8.5 \times 10^{-14}$ | -                      | -                     |
|                           | 6p21.32 | ENSG00000204310 | <i>AGPAT1</i>   | -6.80       | $1.0 \times 10^{-11}$ | 7.80                   | $6.0 \times 10^{-15}$ |
|                           | 6p21.32 | ENSG00000204308 | <i>RNF5</i>     | -6.13       | $9.0 \times 10^{-10}$ | -                      | -                     |
|                           | 6p21.33 | ENSG00000204396 | <i>VWA7</i>     | -5.64       | $1.7 \times 10^{-8}$  | 4.98                   | $6.4 \times 10^{-7}$  |
|                           | 6p21.33 | ENSG00000227507 | <i>LTB</i>      | -5.56       | $2.8 \times 10^{-8}$  | -                      | -                     |
|                           | 6p21.33 | ENSG00000204463 | <i>BAG6</i>     | 5.30        | $1.2 \times 10^{-7}$  | -                      | -                     |
|                           | 6p21.32 | ENSG00000196126 | <i>HLA-DRB1</i> | -           | -                     | -9.995                 | $1.6 \times 10^{-23}$ |

|     |         |                 |                  |       |                       |       |                       |
|-----|---------|-----------------|------------------|-------|-----------------------|-------|-----------------------|
|     | 6p21.32 | ENSG00000196735 | <i>HLA-DQA1</i>  | -     | -                     | -5.73 | 9.8×10 <sup>-9</sup>  |
|     | 6p21.32 | ENSG00000204252 | <i>HLA-DOA</i>   | -     | -                     | -5.90 | 3.6×10 <sup>-9</sup>  |
|     | 6p21.32 | ENSG00000204261 | <i>PSMB8-AS1</i> | -     | -                     | -5.36 | 8.1×10 <sup>-8</sup>  |
|     | 6p21.32 | ENSG00000204264 | <i>PSMB8</i>     | -     | -                     | 5.71  | 1.2×10 <sup>-8</sup>  |
|     | 6p21.32 | ENSG00000204301 | <i>NOTCH4</i>    | -     | -                     | -5.85 | 5.0×10 <sup>-9</sup>  |
|     | 6p21.33 | ENSG00000213760 | <i>ATP6V1G2</i>  | -     | -                     | -4.98 | 6.2×10 <sup>-7</sup>  |
|     | 6p21.33 | ENSG00000226979 | <i>LTA</i>       | -     | -                     | 5.81  | 6.2×10 <sup>-9</sup>  |
|     | 6p21.33 | ENSG00000204371 | <i>EHMT2</i>     | -8.64 | 5.8×10 <sup>-18</sup> | -     | -                     |
|     | 6p21.33 | ENSG00000213722 | <i>DDAH2</i>     | -8.49 | 2.2×10 <sup>-17</sup> | -4.69 | 2.7×10 <sup>-6</sup>  |
|     | 6p21.33 | ENSG00000227507 | <i>LTB</i>       | -8.24 | 1.7×10 <sup>-16</sup> | -     | -                     |
|     | 6p21.33 | ENSG00000204396 | <i>VWA7</i>      | -6.20 | 5.7×10 <sup>-10</sup> | 5.40  | 6.7×10 <sup>-8</sup>  |
|     | 6p21.32 | ENSG00000204305 | <i>AGER</i>      | 5.27  | 1.4×10 <sup>-7</sup>  | 9.35  | 9.0×10 <sup>-21</sup> |
|     | 6p21.32 | ENSG00000240065 | <i>PSMB9</i>     | 5.18  | 2.2×10 <sup>-7</sup>  | -     | -                     |
|     | 6p21.33 | ENSG00000146112 | <i>PPP1R18</i>   | 5.11  | 3.2×10 <sup>-7</sup>  | -     | -                     |
| MCV | 6p21.32 | ENSG00000241106 | <i>HLA-DOB</i>   | -4.75 | 2.0×10 <sup>-6</sup>  | -5.79 | 7.1×10 <sup>-9</sup>  |
|     | 6p21.32 | ENSG00000237541 | <i>HLA-DQA2</i>  | 4.72  | 2.3×10 <sup>-6</sup>  | -     | -                     |
|     | 6p21.32 | ENSG00000179344 | <i>HLA-DQB1</i>  | -     | -                     | -6.79 | 1.1×10 <sup>-11</sup> |
|     | 6p21.32 | ENSG00000196126 | <i>HLA-DRB1</i>  | -     | -                     | -5.41 | 6.4×10 <sup>-8</sup>  |
|     | 6p21.32 | ENSG00000196735 | <i>HLA-DQA1</i>  | -     | -                     | -6.48 | 9.4×10 <sup>-11</sup> |
|     | 6p21.32 | ENSG00000204310 | <i>AGPAT1</i>    | -     | -                     | 4.92  | 8.5×10 <sup>-7</sup>  |
|     | 6p21.33 | ENSG00000226979 | <i>LTA</i>       | -     | -                     | 8.84  | 9.9×10 <sup>-19</sup> |
|     | 6p21.33 | ENSG00000228789 | <i>HCG22</i>     | -     | -                     | 5.40  | 6.5×10 <sup>-8</sup>  |
|     | 5q31.2  | ENSG00000249751 | <i>ECSCR</i>     | -     | -                     | 5.63  | 1.8×10 <sup>-8</sup>  |

**Table S28:** Replication results for previously reported genome-wide significant associations for variants and classical HLA alleles for selected antigens. Replication was restricted to findings from genome-wide association studies of serological phenotypes (IgG levels or seropositivity) conducted in primarily non-diseased populations or controls. Variants reported in multiple studies are listed under the earlier publication.

| Study                                     | Population                        | Antigen                             | Phenotype  | Variant/Allele                      | Beta/OR    | P                                   |       |         |
|-------------------------------------------|-----------------------------------|-------------------------------------|------------|-------------------------------------|------------|-------------------------------------|-------|---------|
| Hammer et. al<br>(2015)<br>PMID: 26456283 | European<br>ancestry<br>(N=2,363) | EBV EBNA                            | IgG        | DRβ1: Ser-11 Ser-13 His-96 Arg-133  | 0.017      | 0.30                                |       |         |
|                                           |                                   |                                     |            | DRβ1: Gly-11 Tyr-13 His-96 Arg-133  | -0.231     | 1.4E-21                             |       |         |
|                                           |                                   |                                     |            | DRβ1: Pro-11 Arg-13 Gln-96 Leu-133  | 0.243      | 1.5E-27                             |       |         |
|                                           |                                   |                                     |            | DRβ1: Leu-11 Phe-13 Glu-96* Arg-133 | -          | -                                   |       |         |
|                                           |                                   |                                     |            | rs6927022-A                         | 0.204      | 6.0E-33                             |       |         |
|                                           |                                   |                                     |            | HLA-DRb1 (11)                       | -          | 2.6E-49                             |       |         |
|                                           |                                   |                                     |            | DRB1*07:01                          | -0.230     | 3.8E-21                             |       |         |
|                                           |                                   |                                     |            | DRB1*15:01                          | 0.253      | 7.8E-28                             |       |         |
|                                           |                                   |                                     |            | DQB1*06:02                          | 0.244      | 8.5E-26                             |       |         |
|                                           |                                   |                                     |            | DRB1*03:01                          | -0.209     | 6.5E-19                             |       |         |
|                                           |                                   |                                     |            | DRB1*04:01                          | -0.118     | 8.2E-03                             |       |         |
|                                           |                                   |                                     |            | DRB1*15:01-DQB1*06:02               | 0.292      | 6.3E-27                             |       |         |
|                                           |                                   |                                     |            | DRB1*15:01-DQB1*06:02-DQA1*01:02    | 0.305      | 2.5E-28                             |       |         |
|                                           |                                   |                                     |            | DRβ1: Ser-11 Ser-13 His-96 Arg-133  | 1.24       | 2.9E-11                             |       |         |
|                                           |                                   |                                     |            | DRβ1: Gly-11 Tyr-13 His-96 Arg-133  | 1.09       | 0.058                               |       |         |
|                                           |                                   |                                     |            | DRβ1: Pro-11 Arg-13 Gln-96 Leu-133  | 0.54       | 1.4E-42                             |       |         |
|                                           |                                   | DRβ1: Leu-11 Phe-13 Glu-96* Arg-133 | -          | -                                   |            |                                     |       |         |
|                                           |                                   | JCV                                 | Serostatus | rs9269910-A                         | 1.83       | 1.6E-41                             |       |         |
|                                           |                                   |                                     |            | HLA-DRb1 (133)                      | -          | 1.4E-42                             |       |         |
|                                           |                                   |                                     |            | HLA-DQA1*01:02                      | 0.61       | 2.4E-34                             |       |         |
|                                           |                                   |                                     |            | HLA-DRB1*15:01                      | 0.54       | 6.7E-41                             |       |         |
|                                           |                                   |                                     |            | DRB1*15:01-DQB1*06:02               | 0.49       | 7.4E-41                             |       |         |
|                                           |                                   |                                     |            | DRB1*15:01-DQB1*06:02-DQA1*01:02    | 0.48       | 7.8E-42                             |       |         |
|                                           |                                   |                                     |            | MCV                                 | Serostatus | rs1049130-G                         | 0.117 | 1.3E-09 |
|                                           |                                   |                                     |            |                                     |            | DRβ1: Ser-11 Ser-13 His-96 Arg-133  | 1.33  | 2.5E-16 |
|                                           |                                   |                                     |            |                                     |            | DRβ1: Gly-11 Tyr-13 His-96 Arg-133  | 1.08  | 0.13    |
|                                           |                                   |                                     |            |                                     |            | DRβ1: Pro-11 Arg-13 Gln-96 Leu-133  | 0.627 | 3.9E-25 |
|                                           |                                   |                                     |            |                                     |            | DRβ1: Leu-11 Phe-13 Glu-96* Arg-133 | -     | -       |
|                                           |                                   |                                     |            |                                     |            | rs9269268-C                         | 1.60  | 1.4E-25 |
|                                           |                                   |                                     |            |                                     |            | DRb1 (13)                           | -     | 8.5E-28 |
|                                           |                                   |                                     |            |                                     |            | DQB1*06:02                          | 0.62  | 4.0E-25 |
|                                           |                                   |                                     |            | EBV EBNA                            | IgG        | DRB1*15:01                          | 0.62  | 2.6E-24 |
| DRB1*15:01-DQB1*06:02                     | 0.56                              |                                     |            |                                     |            | 6.4E-26                             |       |         |
| DRB1*15:01-DQB1*06:02-DQA1*01:02          | 0.56                              | 9.3E-26                             |            |                                     |            |                                     |       |         |
| rs477515-G                                | 0.212                             | 4.3E-33                             |            |                                     |            |                                     |       |         |
| rs2854275-C                               | 0.214                             | 1.1E-19                             |            |                                     |            |                                     |       |         |
| rs3130048-T                               | 0.142                             | 1.9E-14                             |            |                                     |            |                                     |       |         |
| rs204999-A                                | 0.187                             | 2.7E-25                             |            |                                     |            |                                     |       |         |
| rs4248166-T                               | -0.045                            | 0.043                               |            |                                     |            |                                     |       |         |
| EBV EBNA                                  | Serostatus                        | rs652888-A                          | 1.22       | 3.9E-04                             |            |                                     |       |         |

|                                               |                                                              |          |            |                  |             |         |         |
|-----------------------------------------------|--------------------------------------------------------------|----------|------------|------------------|-------------|---------|---------|
|                                               |                                                              |          |            | rs204999-A       | 1.26        | 9.2E-06 |         |
|                                               |                                                              |          |            | rs4248166-T      | 0.85        | 0.018   |         |
|                                               |                                                              |          |            | rs2294884-T      | 0.86        | 0.033   |         |
|                                               |                                                              |          |            | rs2294882-T      | 0.86        | 0.028   |         |
|                                               |                                                              |          |            | rs2294881-T      | 0.86        | 0.034   |         |
|                                               |                                                              |          |            | rs28362680-G     | 0.89        | 0.28    |         |
|                                               |                                                              |          |            | rs28362683-G     | 0.90        | 0.34    |         |
|                                               |                                                              |          |            | rs10947261-G     | 0.90        | 0.30    |         |
|                                               |                                                              |          |            | rs10947262-C     | 0.91        | 0.34    |         |
|                                               |                                                              |          |            | rs7192-T         | 1.19        | 7.6E-04 |         |
|                                               |                                                              |          |            | rs2239803-C      | 1.22        | 9.4E-05 |         |
|                                               |                                                              |          |            | rs7194-G         | 1.19        | 8.4E-04 |         |
|                                               |                                                              |          |            | rs7195-A         | 1.19        | 7.8E-04 |         |
|                                               |                                                              |          |            | rs2213586-A      | 1.19        | 9.3E-04 |         |
|                                               |                                                              |          |            | rs2213585-G      | 1.19        | 7.4E-04 |         |
|                                               |                                                              |          |            | rs2227139-G      | 1.19        | 7.4E-04 |         |
|                                               |                                                              |          |            | rs7754768-C      | 1.22        | 1.3E-04 |         |
|                                               |                                                              |          |            | rs9268832-T      | 1.22        | 1.1E-04 |         |
| Scepanovic et al.<br>(2018)<br>PMID: 30053915 | French,<br>predominantly<br>European<br>ancestry<br>(N=1000) | EBV EBNA | IgG        | DQB1*03:01       | 0.055       | 0.014   |         |
|                                               |                                                              |          |            | HLA-DRβ1 (58) *  | -           | -       |         |
|                                               |                                                              |          |            | HLA-DRβ1 (56) ** | -           | -       |         |
|                                               |                                                              |          |            | rs74951723-A *** | -           | -       |         |
|                                               |                                                              |          |            | rs9469200-C **** | 0.311       | 1.3E-26 |         |
| Sundqvist et al.<br>(2014)<br>PMID: 24763718  | Swedish<br>(N=2865)                                          | JCV      | Serostatus | DQB1*03:01       | 0.189       | 1.3E-05 |         |
| Chen et al.<br>(2011)<br>PMID: 21896673       | European<br>ancestry<br>(N=4811)                             | HPV8     | Serostatus | rs9357152-G      | HPV16 L1    | 1.27    | 7.8E-03 |
|                                               |                                                              |          |            |                  | HPV16 E6/E7 | 1.04    | 0.65    |

\* Unable to assess replication: amino acid sequences at this position were not well imputed in UK Biobank data (INFO<0.30)

\*\* Unable to assess replication: amino acid sequences at this position were not available in reference panel

\*\*\* Unable to assess replication: no available LD proxy in our GWAS data

\*\*\*\* Replication results for variant with the second-lowest p-value (rs9469200:  $P=9.2 \times 10^{-14}$  ; LD with rs74951723:  $r^2=0.30$ )
